# Supplementary material for: Genome-wide analysis of differential transcriptional and epigenetic variability across human immune cell types
Source: Genome Biol. 2017 Jan 26;18:18. doi: 10.1186/s13059-017-1156-8 (PMC5270224; doi:10.1186/s13059-017-1156-8)
Supplement: Additional file 2: — Annotation of genes showing hypervariable gene expression. For cell type-specific hypervariable genes, we provide the results of the correlation analyses of gene expression levels with genetic variation, donor-specific information, cell counts in peripheral blood, as well as seasonal data (corresponding to the date of blood donation). Only correlations with BH-corrected P < 0.05 are reported (indicated by “TRUE”). For all traits other than genetic variation the results presented are based on Spearman correlation tests (see Additional file 4 for correlation coefficients and P values). More detailed information, such as the corresponding SNP IDs for expression QTLs (obtained by the BLUEPRINT Human Variation Panel), can be found in our data portal available online at: http://blueprint-dev.bioinfo.cnio.es/WP10/hypervariability. (XLSX 467 kb) [file 13059_2017_1156_MOESM2_ESM.xlsx]

## Sheet: Monocytes
Ensembl ID	HGNC symbol	GO term	Genotype	Age	Sex	BMI	Alcohol	Monocyte count	Monocyte percentage	Maximum temperature	Minimum temperature	Daylight
ENSG00000002933	TMEM176A	negative regulation of dendritic cell differentiation, integral to membrane, protein binding	TRUE	FALSE	FALSE	FALSE	FALSE	FALSE	FALSE	FALSE	FALSE	FALSE
ENSG00000101665	SMAD7	transcription, DNA-dependent, negative regulation of transcription from RNA polymerase II promoter, intracellular signal transduction, positive regulation of transcription from RNA polymerase II promoter, negative regulation of transcription, DNA-dependent, negative regulation of sequence-specific DNA binding transcription factor activity, regulation of transcription, DNA-dependent, gene expressi…	FALSE	FALSE	FALSE	FALSE	FALSE	FALSE	FALSE	FALSE	FALSE	FALSE
ENSG00000104921	FCER2	positive regulation of humoral immune response mediated by circulating immunoglobulin, positive regulation of nitric-oxide synthase biosynthetic process, positive regulation of nitric-oxide synthase activity, positive regulation of killing of cells of other organism, extracellular region, integral to plasma membrane, external side of plasma membrane, metal ion binding, carbohydrate binding, integ…	TRUE	FALSE	FALSE	FALSE	FALSE	FALSE	FALSE	FALSE	FALSE	FALSE
ENSG00000112303	VNN2	nitrogen compound metabolic process, hydrolase activity, acting on carbon-nitrogen (but not peptide) bonds, in linear amides, hydrolase activity, acting on carbon-nitrogen (but not peptide) bonds, cellular component movement, pantothenate metabolic process, plasma membrane, anchored to membrane, pantetheine hydrolase activity	TRUE	FALSE	FALSE	FALSE	FALSE	FALSE	FALSE	FALSE	TRUE	FALSE
ENSG00000140563	MCTP2	protein binding, calcium-mediated signaling, integral to membrane, calcium ion binding	TRUE	FALSE	FALSE	FALSE	FALSE	FALSE	FALSE	FALSE	FALSE	FALSE
ENSG00000143847	PPFIA4	cell communication, cytoplasm, intracellular, cell surface, protein binding	TRUE	FALSE	FALSE	FALSE	FALSE	FALSE	FALSE	FALSE	FALSE	FALSE
ENSG00000153157	SYCP2L	nucleus	FALSE	FALSE	FALSE	FALSE	FALSE	FALSE	FALSE	FALSE	FALSE	FALSE
ENSG00000155657	TTN	sarcomere organization, cardiac muscle contraction, in utero embryonic development, protein phosphorylation, somitogenesis, regulation of protein kinase activity, platelet activation, regulation of catalytic activity, blood coagulation, response to calcium ion, muscle contraction, skeletal muscle thin filament assembly, cardiac myofibril assembly, platelet degranulation, adult heart development, …	FALSE	FALSE	FALSE	FALSE	FALSE	FALSE	FALSE	TRUE	TRUE	TRUE
ENSG00000163697	APBB2	axon guidance, neuron migration, negative regulation of apoptotic process, negative regulation of cell growth, intracellular signal transduction, regulation of transcription, DNA-dependent, positive regulation of apoptotic process, cell cycle arrest, extracellular matrix organization, negative regulation of S phase of mitotic cell cycle, nucleus, cytoplasm, membrane, growth cone, lamellipodium, s…	TRUE	FALSE	FALSE	FALSE	FALSE	FALSE	FALSE	FALSE	FALSE	FALSE
ENSG00000168234	TTC39C		TRUE	FALSE	FALSE	FALSE	FALSE	FALSE	FALSE	FALSE	FALSE	FALSE
ENSG00000169155	ZBTB43	transcription, DNA-dependent, regulation of transcription, DNA-dependent, nucleus, intracellular, DNA binding, zinc ion binding, protein binding	FALSE	FALSE	FALSE	FALSE	FALSE	FALSE	FALSE	FALSE	FALSE	FALSE
ENSG00000175606	TMEM70	mitochondrial proton-transporting ATP synthase complex assembly, mitochondrial inner membrane, integral to mitochondrial membrane, mitochondrion, molecular_function	TRUE	FALSE	FALSE	FALSE	FALSE	FALSE	FALSE	FALSE	FALSE	FALSE
ENSG00000179029	TMEM107	cilium assembly, biological_process, multicellular organismal development, integral to membrane, cellular_component, molecular_function, embryonic digit morphogenesis, neural tube patterning	TRUE	FALSE	FALSE	FALSE	FALSE	FALSE	FALSE	FALSE	FALSE	FALSE
ENSG00000197798	FAM118B		TRUE	FALSE	FALSE	FALSE	FALSE	FALSE	FALSE	FALSE	FALSE	FALSE

## Sheet: Neutrophils
Ensembl ID	HGNC symbol	GO term	Genotype	Age	Sex	BMI	Alcohol	Neutrophil count	Neutrophil percentage	Neutrophil granularity	Neutrophil cellular content	Maximum temperature	Minimum temperature	Daylight
ENSG00000001630	CYP51A1	oxidation-reduction process, small molecule metabolic process, cholesterol biosynthetic process, xenobiotic metabolic process, cholesterol biosynthetic process via 24,25-dihydrolanosterol, integral to membrane, endoplasmic reticulum membrane, intracellular membrane-bounded organelle, heme binding, iron ion binding, electron carrier activity, oxidoreductase activity, acting on paired donors, with …	FALSE	FALSE	FALSE	FALSE	FALSE	FALSE	FALSE	FALSE	FALSE	FALSE	FALSE	FALSE
ENSG00000002549	LAP3	proteolysis, nucleus, cytoplasm, intracellular, mitochondrion, trans-Golgi network, zinc ion binding, magnesium ion binding, aminopeptidase activity, manganese ion binding, metalloexopeptidase activity, peptidase activity,	TRUE	FALSE	FALSE	FALSE	FALSE	FALSE	FALSE	FALSE	FALSE	FALSE	FALSE	FALSE
ENSG00000002919	SNX11	cell communication, protein binding, phosphatidylinositol binding, , protein transport, membrane	TRUE	FALSE	FALSE	FALSE	FALSE	FALSE	FALSE	FALSE	FALSE	FALSE	FALSE	FALSE
ENSG00000003147	ICA1	regulation of protein homodimerization activity, neurotransmitter transport, nucleus, cytoplasm, cytosol, perinuclear region of cytoplasm, Golgi membrane, cell junction, synaptic vesicle membrane, dendrite, Golgi stack, secretory granule membrane, transport vesicle membrane, molecular_function, protein domain specific binding	TRUE	FALSE	FALSE	FALSE	FALSE	FALSE	FALSE	FALSE	FALSE	FALSE	FALSE	FALSE
ENSG00000004059	ARF5	small GTPase mediated signal transduction, G-protein coupled receptor signaling pathway, protein transport, intracellular protein transport, vesicle-mediated transport, GTP catabolic process, nucleus, cytoplasm, plasma membrane, intracellular, perinuclear region of cytoplasm, Golgi apparatus, protein binding, GTP binding, signal transducer activity, guanyl nucleotide binding, GTPase activity, G-p…	FALSE	FALSE	FALSE	FALSE	FALSE	FALSE	FALSE	FALSE	FALSE	FALSE	FALSE	FALSE
ENSG00000005156	LIG3	reciprocal meiotic recombination, spermatogenesis, cell division, DNA repair, base-excision repair, DNA recombination, DNA replication, nucleotide-excision repair, DNA ligation involved in DNA repair, lagging strand elongation, double-strand break repair via nonhomologous end joining, mitochondrial DNA repair, negative regulation of DNA recombination, nucleus, chromosome, nucleoplasm, mitochondri…	FALSE	FALSE	FALSE	FALSE	FALSE	FALSE	FALSE	FALSE	FALSE	FALSE	FALSE	FALSE
ENSG00000005436	GCFC2	transcription, DNA-dependent, negative regulation of transcription, DNA-dependent, regulation of transcription, DNA-dependent, nucleus, DNA binding, sequence-specific DNA binding transcription factor activity	FALSE	FALSE	FALSE	FALSE	FALSE	FALSE	FALSE	FALSE	FALSE	FALSE	FALSE	FALSE
ENSG00000005810	MYCBP2	transcription, DNA-dependent, protein ubiquitination, regulation of transcription, DNA-dependent, central nervous system projection neuron axonogenesis, regulation of protein localization, regulation of cytoskeleton organization, branchiomotor neuron axon guidance, motor neuron axon guidance, cell morphogenesis involved in neuron differentiation, nucleus, axon, microtubule cytoskeleton, protein h…	FALSE	FALSE	FALSE	FALSE	FALSE	FALSE	FALSE	FALSE	FALSE	FALSE	FALSE	FALSE
ENSG00000006715	VPS41	biological_process, intracellular protein transport, vesicle-mediated transport, Golgi vesicle transport, cytosol, membrane, microtubule, early endosome, Golgi-associated vesicle, late endosome, HOPS complex, molecular_function, zinc ion binding, protein binding, microtubule binding, binding, intracellular	TRUE	FALSE	FALSE	FALSE	FALSE	FALSE	FALSE	FALSE	FALSE	FALSE	FALSE	FALSE
ENSG00000006740	ARHGAP44	small GTPase mediated signal transduction, regulation of small GTPase mediated signal transduction, signal transduction, cytoplasm, cytosol, intracellular, protein binding, GTPase activator activity,	FALSE	FALSE	FALSE	FALSE	FALSE	FALSE	FALSE	FALSE	FALSE	FALSE	FALSE	FALSE
ENSG00000007202	KIAA0100	extracellular region	FALSE	FALSE	FALSE	FALSE	FALSE	FALSE	FALSE	FALSE	FALSE	FALSE	FALSE	FALSE
ENSG00000007341	ST7L	negative regulation of cell growth, integral to membrane,	FALSE	FALSE	FALSE	FALSE	FALSE	FALSE	FALSE	FALSE	FALSE	FALSE	FALSE	FALSE
ENSG00000007516	BAIAP3	protein binding, G-protein coupled receptor signaling pathway, neurotransmitter secretion, protein C-terminus binding	TRUE	FALSE	FALSE	FALSE	FALSE	FALSE	FALSE	FALSE	FALSE	FALSE	FALSE	FALSE
ENSG00000007520	TSR3	rRNA processing	FALSE	FALSE	FALSE	FALSE	FALSE	FALSE	FALSE	FALSE	FALSE	FALSE	FALSE	FALSE
ENSG00000008226	DLEC1	negative regulation of cell proliferation, cytoplasm, molecular_function	FALSE	FALSE	FALSE	FALSE	FALSE	FALSE	FALSE	FALSE	FALSE	FALSE	FALSE	FALSE
ENSG00000008735	MAPK8IP2	regulation of excitatory postsynaptic membrane potential, behavioral fear response, social behavior, mating behavior, JNK cascade, positive regulation of stress-activated MAPK cascade, nonassociative learning, dendrite morphogenesis, regulation of synaptic transmission, glutamatergic, regulation of N-methyl-D-aspartate selective glutamate receptor activity, regulation of alpha-amino-3-hydroxy-5-m…	FALSE	FALSE	FALSE	FALSE	FALSE	FALSE	FALSE	FALSE	FALSE	FALSE	FALSE	FALSE
ENSG00000009790	TRAF3IP3	integral to membrane, protein binding, regulation of transcription, DNA-dependent, nucleus, DNA binding	TRUE	FALSE	FALSE	FALSE	FALSE	FALSE	FALSE	FALSE	FALSE	FALSE	FALSE	FALSE
ENSG00000010270	STARD3NL	integral to membrane, late endosome membrane	TRUE	FALSE	FALSE	FALSE	FALSE	FALSE	FALSE	FALSE	FALSE	FALSE	FALSE	FALSE
ENSG00000010295	IFFO1	intermediate filament	TRUE	FALSE	FALSE	FALSE	FALSE	FALSE	FALSE	FALSE	FALSE	FALSE	FALSE	FALSE
ENSG00000010361	FUZ	cilium assembly, protein transport, neural tube closure, establishment of planar polarity, embryonic skeletal system morphogenesis, hair follicle development, embryonic body morphogenesis, regulation of smoothened signaling pathway, cytoplasm, cytoskeleton	FALSE	FALSE	FALSE	FALSE	FALSE	FALSE	FALSE	FALSE	FALSE	FALSE	FALSE	FALSE
ENSG00000010610	CD4	innate immune response, immune response, cell adhesion, signal transduction, viral reproduction, cell surface receptor signaling pathway, T cell activation, positive regulation of peptidyl-tyrosine phosphorylation, T cell receptor signaling pathway, transmembrane receptor protein tyrosine kinase signaling pathway, positive regulation of protein kinase activity, positive regulation of calcium-medi…	TRUE	FALSE	FALSE	FALSE	FALSE	FALSE	FALSE	FALSE	FALSE	FALSE	FALSE	FALSE
ENSG00000010704	HFE	immune response, antigen processing and presentation, antigen processing and presentation of peptide antigen via MHC class I, female pregnancy, hormone biosynthetic process, protein complex assembly, receptor-mediated endocytosis, iron ion transport, cellular iron ion homeostasis, multicellular organismal iron ion homeostasis, cellular response to iron ion starvation, cytoplasm, plasma membrane, …	FALSE	TRUE	FALSE	FALSE	FALSE	FALSE	FALSE	FALSE	FALSE	FALSE	FALSE	FALSE
ENSG00000010810	FYN	axon guidance, neuron migration, peptidyl-tyrosine phosphorylation, response to drug, viral reproduction, cellular response to growth factor stimulus, calcium ion transport, protein phosphorylation, regulation of cell shape, dendrite morphogenesis, cell surface receptor signaling pathway, protein autophosphorylation, T cell receptor signaling pathway, platelet activation, response to ethanol, int…	FALSE	FALSE	FALSE	FALSE	FALSE	FALSE	TRUE	FALSE	FALSE	FALSE	FALSE	FALSE
ENSG00000011295	TTC19	cell cycle, cytokinesis, mitochondrial respiratory chain complex III assembly, mitochondrial inner membrane, centrosome, midbody, mitochondrion, protein binding, , identical protein binding	FALSE	FALSE	FALSE	FALSE	FALSE	FALSE	FALSE	FALSE	FALSE	FALSE	FALSE	FALSE
ENSG00000011478	QPCTL	proteolysis, peptidyl-pyroglutamic acid biosynthetic process, using glutaminyl-peptide cyclotransferase, integral to membrane, Golgi membrane, Golgi apparatus, zinc ion binding, peptidase activity, glutaminyl-peptide cyclotransferase activity	FALSE	FALSE	FALSE	FALSE	FALSE	FALSE	FALSE	FALSE	FALSE	FALSE	FALSE	FALSE
ENSG00000011523	CEP68	centrosome organization, centrosome	TRUE	FALSE	FALSE	FALSE	FALSE	FALSE	FALSE	FALSE	FALSE	FALSE	FALSE	FALSE
ENSG00000012061	ERCC1	cell proliferation, negative regulation of apoptotic process, spermatogenesis, response to oxidative stress, multicellular organism growth, DNA repair, DNA recombination, male gonad development, multicellular organismal aging, chromosome organization, response to sucrose stimulus, embryonic organ development, oogenesis, nucleotide-excision repair, response to nutrient, germ cell development, resp…	FALSE	FALSE	FALSE	FALSE	FALSE	FALSE	FALSE	FALSE	FALSE	FALSE	FALSE	FALSE
ENSG00000013275	PSMC4	proteolysis, apoptotic process, regulation of apoptotic process, small molecule metabolic process, protein polyubiquitination, protein catabolic process, antigen processing and presentation of peptide antigen via MHC class I, DNA repair, mitotic cell cycle, ATP catabolic process, DNA recombination, viral reproduction, cell cycle checkpoint, S phase of mitotic cell cycle, M/G1 transition of mitoti…	FALSE	FALSE	FALSE	FALSE	FALSE	FALSE	FALSE	FALSE	FALSE	FALSE	FALSE	FALSE
ENSG00000013523	ANGEL1		TRUE	FALSE	FALSE	FALSE	FALSE	FALSE	FALSE	FALSE	FALSE	FALSE	FALSE	FALSE
ENSG00000013583	HEBP1	circadian rhythm, cytoplasm, extracellular region, mitochondrion, cytosol, heme binding, binding	TRUE	FALSE	FALSE	FALSE	FALSE	FALSE	FALSE	FALSE	FALSE	FALSE	FALSE	FALSE
ENSG00000014138	POLA2	mitotic cell cycle, S phase of mitotic cell cycle, M/G1 transition of mitotic cell cycle, DNA replication, DNA replication initiation, telomere maintenance, G1/S transition of mitotic cell cycle, protein import into nucleus, translocation, DNA strand elongation involved in DNA replication, telomere maintenance via recombination, telomere maintenance via semi-conservative replication, nucleus, cyt…	TRUE	FALSE	FALSE	FALSE	FALSE	FALSE	FALSE	FALSE	FALSE	FALSE	FALSE	FALSE
ENSG00000021776	AQR	mRNA splicing, via spliceosome, catalytic step 2 spliceosome, pre-mRNA intronic binding, spliceosomal complex	TRUE	FALSE	FALSE	FALSE	FALSE	FALSE	FALSE	FALSE	FALSE	FALSE	FALSE	FALSE
ENSG00000022567	SLC45A4	transmembrane transport, transport, integral to membrane	TRUE	FALSE	FALSE	FALSE	FALSE	FALSE	FALSE	FALSE	FALSE	FALSE	FALSE	FALSE
ENSG00000023516	AKAP11	intracellular protein kinase cascade, regulation of protein kinase A signaling cascade, cytoplasm, plasma membrane, nucleolus, protein complex, microtubule organizing center, protein complex scaffold, protein phosphatase 1 binding, protein kinase A binding, protein kinase A regulatory subunit binding, protein kinase A catalytic subunit binding	TRUE	FALSE	FALSE	FALSE	FALSE	FALSE	FALSE	FALSE	FALSE	FALSE	FALSE	FALSE
ENSG00000023572	GLRX2	apoptotic process, cell differentiation, glutathione metabolic process, regulation of transcription, DNA-dependent, electron transport chain, cell redox homeostasis, response to hydrogen peroxide, protein thiol-disulfide exchange, response to organic substance, regulation of signal transduction, response to temperature stimulus, response to redox state, DNA protection, nucleus, mitochondrion, met…	TRUE	FALSE	FALSE	FALSE	FALSE	FALSE	FALSE	FALSE	FALSE	FALSE	FALSE	FALSE
ENSG00000023734	STRAP	negative regulation of transcription from RNA polymerase II promoter, negative regulation of transforming growth factor beta receptor signaling pathway, nucleus, cytoplasm, plasma membrane, mitochondrion, cell junction, protein binding, kinase activity, receptor binding, mRNA processing, RNA splicing, transforming growth factor beta receptor signaling pathway, cytosol, spliceosomal complex	FALSE	FALSE	FALSE	FALSE	FALSE	FALSE	FALSE	FALSE	FALSE	FALSE	FALSE	FALSE
ENSG00000023902	PLEKHO1	nucleus, cytoplasm, plasma membrane, protein binding, phospholipid binding	TRUE	FALSE	FALSE	FALSE	FALSE	FALSE	FALSE	FALSE	FALSE	FALSE	FALSE	FALSE
ENSG00000025800	KPNA6	protein import into nucleus, NLS-bearing substrate import into nucleus, nucleus, cytoplasm, protein binding, protein transporter activity, binding	FALSE	FALSE	FALSE	FALSE	FALSE	FALSE	FALSE	FALSE	FALSE	FALSE	FALSE	FALSE
ENSG00000026508	CD44	negative regulation of apoptotic process, small molecule metabolic process, cell adhesion, cell-matrix adhesion, carbohydrate metabolic process, Wnt receptor signaling pathway, cell-cell adhesion, branching involved in ureteric bud morphogenesis, positive regulation of peptidyl-serine phosphorylation, negative regulation of cysteine-type endopeptidase activity involved in apoptotic process, cytok…	TRUE	FALSE	FALSE	FALSE	FALSE	FALSE	FALSE	FALSE	FALSE	FALSE	FALSE	FALSE
ENSG00000027075	PRKCH	protein phosphorylation, positive regulation of macrophage derived foam cell differentiation, positive regulation of keratinocyte differentiation, plasma membrane, cytosol, ATP binding, protein serine/threonine kinase activity, protein kinase activity, protein tyrosine kinase activity, transferase activity, transferring phosphorus-containing groups, Ral GTPase binding, protein binding, intracellu…	TRUE	FALSE	FALSE	FALSE	FALSE	FALSE	FALSE	FALSE	FALSE	FALSE	FALSE	FALSE
ENSG00000034510	TMSB10	cytoskeleton organization, actin cytoskeleton organization, sequestering of actin monomers, cytoplasm, cytoskeleton, actin binding	TRUE	FALSE	FALSE	FALSE	FALSE	FALSE	FALSE	FALSE	FALSE	FALSE	FALSE	FALSE
ENSG00000035681	NSMAF	signal transduction, ceramide metabolic process, cytoplasm, protein binding, receptor signaling protein activity	FALSE	FALSE	FALSE	FALSE	FALSE	FALSE	FALSE	FALSE	FALSE	FALSE	FALSE	FALSE
ENSG00000035928	RFC1	transcription, DNA-dependent, regulation of transcription, DNA-dependent, DNA repair, mitotic cell cycle, S phase of mitotic cell cycle, DNA replication, nucleotide-excision repair, telomere maintenance, positive regulation of catalytic activity, DNA-dependent DNA replication, transcription-coupled nucleotide-excision repair, telomere maintenance via telomerase, DNA strand elongation involved in …	TRUE	FALSE	FALSE	FALSE	FALSE	FALSE	FALSE	FALSE	FALSE	FALSE	FALSE	FALSE
ENSG00000042445	RETSAT	oxidation-reduction process, retinol metabolic process, endoplasmic reticulum membrane, nuclear membrane, nuclear outer membrane, oxidoreductase activity, all-trans-retinol 13,14-reductase activity	TRUE	FALSE	FALSE	FALSE	FALSE	FALSE	FALSE	FALSE	FALSE	FALSE	FALSE	FALSE
ENSG00000043143	PHF15	zinc ion binding, protein binding, histone H4-K5 acetylation, histone H4-K8 acetylation, histone H3 acetylation, histone H4-K12 acetylation, histone acetyltransferase complex	FALSE	FALSE	FALSE	FALSE	FALSE	FALSE	FALSE	FALSE	FALSE	FALSE	FALSE	FALSE
ENSG00000047188	YTHDC2	protein binding, ATP binding, nucleic acid binding, ATP-dependent helicase activity, helicase activity	TRUE	FALSE	FALSE	FALSE	FALSE	FALSE	FALSE	FALSE	FALSE	FALSE	FALSE	FALSE
ENSG00000047579	DTNBP1	neuron projection morphogenesis, cellular membrane organization, actin cytoskeleton reorganization, blood coagulation, neuron projection development, post-Golgi vesicle-mediated transport, melanosome organization, platelet dense granule organization, anterograde axon cargo transport, anterograde synaptic vesicle transport, regulation of dopamine receptor signaling pathway, organelle organization,…	TRUE	FALSE	FALSE	FALSE	FALSE	FALSE	FALSE	FALSE	FALSE	FALSE	FALSE	FALSE
ENSG00000047662	FAM184B		FALSE	FALSE	FALSE	FALSE	FALSE	FALSE	FALSE	FALSE	FALSE	FALSE	FALSE	FALSE
ENSG00000048392	RRM2B	negative regulation of apoptotic process, oxidation-reduction process, small molecule metabolic process, response to oxidative stress, DNA repair, kidney development, mitochondrial DNA replication, deoxyribonucleoside diphosphate metabolic process, deoxyribonucleotide biosynthetic process, renal system process, nucleobase-containing small molecule metabolic process, nucleobase-containing small mo…	TRUE	FALSE	FALSE	FALSE	FALSE	FALSE	FALSE	FALSE	FALSE	FALSE	FALSE	FALSE
ENSG00000049089	COL9A2	axon guidance, skeletal system development, extracellular matrix organization, extracellular region, endoplasmic reticulum lumen, collagen type IX, extracellular matrix structural constituent conferring tensile strength, collagen	TRUE	FALSE	FALSE	FALSE	FALSE	FALSE	FALSE	FALSE	FALSE	FALSE	FALSE	FALSE
ENSG00000049239	H6PD	oxidation-reduction process, carbohydrate metabolic process, glucose metabolic process, pentose-phosphate shunt, response to alcohol, NADP metabolic process, endoplasmic reticulum lumen, intracellular membrane-bounded organelle, mitochondrion, cytoplasm, NADP binding, glucose-6-phosphate dehydrogenase activity, 6-phosphogluconolactonase activity, glucose 1-dehydrogenase [NAD(P)] activity, carbohy…	TRUE	FALSE	FALSE	FALSE	FALSE	FALSE	FALSE	FALSE	FALSE	FALSE	FALSE	FALSE
ENSG00000049860	HEXB	skeletal system development, positive regulation of transcription from RNA polymerase II promoter, carbohydrate metabolic process, phospholipid biosynthetic process, neuromuscular process controlling balance, cellular protein metabolic process, sensory perception of sound, regulation of cell shape, locomotory behavior, oogenesis, myelination, cellular calcium ion homeostasis, N-acetylglucosamine …	TRUE	FALSE	FALSE	FALSE	FALSE	FALSE	FALSE	FALSE	FALSE	FALSE	FALSE	FALSE
ENSG00000051523	CYBA	innate immune response, inflammatory response, oxidation-reduction process, superoxide metabolic process, antigen processing and presentation of peptide antigen via MHC class I, response to drug, hydrogen peroxide biosynthetic process, antigen processing and presentation of exogenous peptide antigen via MHC class I, TAP-dependent, antigen processing and presentation of exogenous peptide antigen v…	TRUE	FALSE	FALSE	FALSE	FALSE	FALSE	FALSE	FALSE	FALSE	FALSE	FALSE	FALSE
ENSG00000052841	TTC17	protein binding	FALSE	FALSE	FALSE	FALSE	FALSE	FALSE	TRUE	FALSE	FALSE	FALSE	FALSE	FALSE
ENSG00000054219	LY75	inflammatory response, immune response, endocytosis, integral to plasma membrane, carbohydrate binding, receptor activity	TRUE	FALSE	FALSE	FALSE	FALSE	FALSE	FALSE	FALSE	FALSE	FALSE	FALSE	FALSE
ENSG00000054983	GALC	carbohydrate metabolic process, galactosylceramide catabolic process, cation binding, galactosylceramidase activity, mitochondrion, small molecule metabolic process, phospholipid metabolic process, sphingolipid metabolic process, glycosphingolipid metabolic process, lysosome, lysosomal lumen	TRUE	FALSE	FALSE	FALSE	FALSE	FALSE	FALSE	FALSE	FALSE	FALSE	FALSE	FALSE
ENSG00000055332	EIF2AK2	negative regulation of cell proliferation, translation, protein phosphorylation, defense response to virus, protein autophosphorylation, endoplasmic reticulum unfolded protein response, virus-infected cell apoptotic process, negative regulation of osteoblast proliferation, virus-host interaction, viral infectious cycle, modulation by virus of host cellular process, evasion or tolerance by virus o…	TRUE	FALSE	FALSE	FALSE	FALSE	FALSE	FALSE	FALSE	FALSE	FALSE	FALSE	FALSE
ENSG00000056097	ZFR	multicellular organismal development, nucleus, cytoplasm, intracellular, chromosome, RNA binding, DNA binding, zinc ion binding, protein binding, nucleic acid binding	TRUE	FALSE	FALSE	FALSE	FALSE	FALSE	FALSE	FALSE	FALSE	FALSE	FALSE	FALSE
ENSG00000056586	RC3H2	biological_process, membrane, perinuclear region of cytoplasm, cell surface, endomembrane system, DNA binding, zinc ion binding, protein binding, nucleic acid binding	FALSE	FALSE	FALSE	FALSE	FALSE	FALSE	FALSE	FALSE	FALSE	FALSE	FALSE	FALSE
ENSG00000057252	SOAT1	cholesterol metabolic process, cholesterol homeostasis, cholesterol efflux, positive regulation of amyloid precursor protein biosynthetic process, very-low-density lipoprotein particle assembly, macrophage derived foam cell differentiation, cholesterol esterification, cholesterol storage, integral to membrane, endoplasmic reticulum membrane, membrane, endoplasmic reticulum, fatty-acyl-CoA binding…	TRUE	FALSE	FALSE	FALSE	FALSE	FALSE	FALSE	FALSE	FALSE	FALSE	FALSE	FALSE
ENSG00000058668	ATP2B4	transmembrane transport, transport, ion transmembrane transport, metabolic process, ATP biosynthetic process, blood coagulation, cation transport, neural retina development, calcium ion transmembrane transport, plasma membrane, membrane, integral to plasma membrane, nucleotide binding, protein binding, ATP binding, metal ion binding, catalytic activity, calmodulin binding, ATPase activity, couple…	TRUE	FALSE	FALSE	FALSE	FALSE	FALSE	FALSE	FALSE	FALSE	FALSE	FALSE	FALSE
ENSG00000059145	UNKL	protein ubiquitination, nucleus, cytoplasm, zinc ion binding, protein binding, ligase activity, nucleic acid binding	FALSE	FALSE	FALSE	FALSE	FALSE	FALSE	FALSE	FALSE	FALSE	FALSE	FALSE	FALSE
ENSG00000059378	PARP12	nucleus, zinc ion binding, nucleic acid binding, NAD+ ADP-ribosyltransferase activity	FALSE	FALSE	FALSE	FALSE	FALSE	FALSE	FALSE	FALSE	FALSE	FALSE	FALSE	FALSE
ENSG00000059691	PET112	translation, mitochondrial translation, glutaminyl-tRNAGln biosynthesis via transamidation, mitochondrion, glutamyl-tRNA(Gln) amidotransferase complex, ATP binding, ligase activity, carbon-nitrogen ligase activity, with glutamine as amido-N-donor, glutaminyl-tRNA synthase (glutamine-hydrolyzing) activity, translation factor activity, nucleic acid binding, transferase activity	FALSE	FALSE	FALSE	FALSE	FALSE	FALSE	FALSE	FALSE	FALSE	FALSE	FALSE	FALSE
ENSG00000059769	DNAJC25	protein folding, integral to membrane, unfolded protein binding, heat shock protein binding, G-protein coupled receptor signaling pathway, heterotrimeric G-protein complex, signal transducer activity	FALSE	FALSE	FALSE	FALSE	FALSE	FALSE	FALSE	FALSE	FALSE	FALSE	FALSE	FALSE
ENSG00000060069	CTDP1	viral reproduction, gene expression, transcription from RNA polymerase II promoter, protein dephosphorylation, transcription elongation from RNA polymerase II promoter, positive regulation of viral transcription, exit from mitosis, nucleus, centrosome, spindle, nucleoplasm, spindle pole, actin cytoskeleton, midbody, spindle midzone, protein binding, phosphoprotein phosphatase activity, DNA-direct…	TRUE	FALSE	FALSE	FALSE	FALSE	FALSE	FALSE	FALSE	FALSE	FALSE	FALSE	FALSE
ENSG00000060491	OGFR	regulation of cell growth, opioid receptor signaling pathway, nucleus, cellular_component, cytoplasm, membrane, receptor activity, opioid receptor activity	FALSE	FALSE	FALSE	FALSE	FALSE	FALSE	FALSE	FALSE	FALSE	FALSE	FALSE	FALSE
ENSG00000060762	MPC1	biological_process, transport, pyruvate metabolic process, mitochondrial pyruvate transport, pyruvate transmembrane transport, integral to membrane, cellular_component, mitochondrial inner membrane, mitochondrion, molecular_function, pyruvate transmembrane transporter activity	TRUE	FALSE	FALSE	FALSE	FALSE	FALSE	FALSE	FALSE	FALSE	FALSE	FALSE	FALSE
ENSG00000060982	BCAT1	cell proliferation, small molecule metabolic process, cellular nitrogen compound metabolic process, metabolic process, branched-chain amino acid catabolic process, G1/S transition of mitotic cell cycle, branched-chain amino acid biosynthetic process, branched-chain amino acid metabolic process, cytosol, catalytic activity, L-leucine transaminase activity, L-valine transaminase activity, L-isoleuc…	TRUE	FALSE	FALSE	FALSE	FALSE	FALSE	FALSE	FALSE	FALSE	FALSE	FALSE	FALSE
ENSG00000062485	CS	small molecule metabolic process, tricarboxylic acid cycle, carbohydrate metabolic process, cellular carbohydrate metabolic process, oxaloacetate metabolic process, citrate metabolic process, mitochondrion, mitochondrial matrix, citrate (Si)-synthase activity, transferase activity, transferring acyl groups, acyl groups converted into alkyl on transfer	FALSE	FALSE	FALSE	FALSE	FALSE	FALSE	FALSE	FALSE	FALSE	FALSE	FALSE	FALSE
ENSG00000063015	SEZ6	regulation of excitatory postsynaptic membrane potential, positive regulation of dendrite development, negative regulation of dendrite development, integral to membrane, plasma membrane, extracellular space, dendritic shaft, dendritic spine, , regulation of dendrite development	FALSE	FALSE	FALSE	FALSE	FALSE	FALSE	FALSE	FALSE	FALSE	FALSE	FALSE	FALSE
ENSG00000063322	MED29	transcription, DNA-dependent, regulation of transcription, DNA-dependent, mediator complex, protein binding	FALSE	FALSE	FALSE	FALSE	FALSE	FALSE	FALSE	FALSE	FALSE	FALSE	FALSE	FALSE
ENSG00000064313	TAF2	positive regulation of transcription from RNA polymerase II promoter, response to organic cyclic compound, transcription initiation from RNA polymerase II promoter, G2/M transition of mitotic cell cycle, transcription factor TFIID complex, transcription factor TFTC complex, zinc ion binding, protein binding, metallopeptidase activity, transcription regulatory region DNA binding, binding	TRUE	FALSE	FALSE	FALSE	FALSE	FALSE	FALSE	FALSE	FALSE	FALSE	FALSE	FALSE
ENSG00000064419	TNPO3	splicing factor protein import into nucleus, nucleus, cytoplasm, intracellular membrane-bounded organelle, protein binding, receptor activity, binding	TRUE	FALSE	FALSE	FALSE	FALSE	FALSE	FALSE	FALSE	FALSE	FALSE	FALSE	FALSE
ENSG00000064490	RFXANK	positive regulation of transcription from RNA polymerase II promoter, Ras protein signal transduction, nucleus, cytoplasm, histone deacetylase binding, protein binding, transcription, DNA-dependent, DNA binding, sequence-specific DNA binding transcription factor activity, transcription cofactor activity	TRUE	FALSE	FALSE	FALSE	FALSE	FALSE	FALSE	FALSE	FALSE	FALSE	FALSE	FALSE
ENSG00000064961	HMG20B	protein binding, transcription, DNA-dependent, cell cycle, regulation of transcription, DNA-dependent, chromatin modification, blood coagulation, chromatin organization, positive regulation of neuron differentiation, negative regulation of protein sumoylation, nucleus, chromosome, nucleoplasm, DNA binding, sequence-specific DNA binding transcription factor activity, protein heterodimerization act…	FALSE	FALSE	FALSE	FALSE	FALSE	FALSE	FALSE	FALSE	FALSE	FALSE	FALSE	FALSE
ENSG00000065600	TMEM206	integral to membrane	FALSE	FALSE	FALSE	FALSE	FALSE	FALSE	FALSE	FALSE	FALSE	FALSE	FALSE	FALSE
ENSG00000065675	PRKCQ	axon guidance, apoptotic process, inflammatory response, intracellular signal transduction, regulation of cell growth, regulation of transcription, DNA-dependent, response to hypoxia, response to organic cyclic compound, protein phosphorylation, aging, response to insulin stimulus, response to glucose stimulus, positive regulation of stress fiber assembly, T cell receptor signaling pathway, posit…	TRUE	FALSE	FALSE	FALSE	FALSE	FALSE	TRUE	FALSE	FALSE	FALSE	FALSE	FALSE
ENSG00000065978	YBX1	negative regulation of transcription from RNA polymerase II promoter, negative regulation of transcription, DNA-dependent, positive regulation of cell division, regulation of transcription, DNA-dependent, gene expression, RNA splicing, in utero embryonic development, transcription from RNA polymerase II promoter, mRNA splicing, via spliceosome, CRD-mediated mRNA stabilization, negative regulation…	FALSE	FALSE	FALSE	FALSE	FALSE	FALSE	FALSE	FALSE	FALSE	FALSE	FALSE	FALSE
ENSG00000066027	PPP2R5A	signal transduction, positive regulation of protein dephosphorylation, negative regulation of establishment of protein localization to plasma membrane, negative regulation of lipid kinase activity, nucleus, cytoplasm, membrane, chromosome, centromeric region, M band, protein phosphatase type 2A complex, Z disc, protein binding, kinase binding, protein phosphatase type 2A regulator activity, bindi…	TRUE	FALSE	FALSE	FALSE	FALSE	FALSE	FALSE	FALSE	FALSE	FALSE	FALSE	FALSE
ENSG00000066322	ELOVL1	fatty acid elongation, saturated fatty acid, triglyceride biosynthetic process, long-chain fatty-acyl-CoA biosynthetic process, very long-chain fatty acid biosynthetic process, cellular lipid metabolic process, small molecule metabolic process, fatty acid elongation, monounsaturated fatty acid, sphingolipid biosynthetic process, integral to membrane, endoplasmic reticulum membrane, endoplasmic re…	FALSE	FALSE	FALSE	FALSE	FALSE	FALSE	FALSE	FALSE	FALSE	FALSE	FALSE	FALSE
ENSG00000066427	ATXN3	transcription, DNA-dependent, regulation of transcription, DNA-dependent, actin cytoskeleton organization, microtubule cytoskeleton organization, cellular response to misfolded protein, nervous system development, synaptic transmission, nucleotide-excision repair, proteasomal ubiquitin-dependent protein catabolic process, cell death, intermediate filament cytoskeleton organization, monoubiquitina…	TRUE	FALSE	FALSE	FALSE	FALSE	FALSE	FALSE	FALSE	FALSE	FALSE	FALSE	FALSE
ENSG00000066583	ISOC1	metabolic process, catalytic activity, biological_process, peroxisome, molecular_function	TRUE	FALSE	FALSE	FALSE	FALSE	FALSE	FALSE	FALSE	FALSE	FALSE	FALSE	FALSE
ENSG00000066654	THUMPD1	RNA binding	FALSE	FALSE	FALSE	FALSE	FALSE	FALSE	FALSE	FALSE	FALSE	FALSE	FALSE	FALSE
ENSG00000067066	SP100	negative regulation of transcription from RNA polymerase II promoter, positive regulation of transcription, DNA-dependent, negative regulation of transcription, DNA-dependent, negative regulation of sequence-specific DNA binding transcription factor activity, response to cytokine stimulus, cytokine-mediated signaling pathway, negative regulation of DNA binding, response to retinoic acid, response…	TRUE	FALSE	FALSE	FALSE	FALSE	FALSE	FALSE	FALSE	FALSE	FALSE	FALSE	FALSE
ENSG00000067225	PKM	small molecule metabolic process, organ regeneration, response to hypoxia, carbohydrate metabolic process, ATP biosynthetic process, glycolysis, glucose metabolic process, response to insulin stimulus, response to gravity, liver development, response to nutrient, skeletal muscle tissue regeneration, programmed cell death, response to muscle inactivity, pyruvate biosynthetic process, nucleus, cyto…	FALSE	FALSE	FALSE	FALSE	FALSE	FALSE	FALSE	FALSE	FALSE	FALSE	FALSE	FALSE
ENSG00000068028	RASSF1	signal transduction, cell cycle arrest, negative regulation of cell cycle arrest, positive regulation of protein ubiquitination, response to DNA damage stimulus, Ras protein signal transduction, protein stabilization, nucleus, cytoplasm, plasma membrane, microtubule, microtubule cytoskeleton, spindle pole, microtubule organizing center, zinc ion binding, protein binding, identical protein binding…	TRUE	FALSE	FALSE	FALSE	FALSE	FALSE	FALSE	FALSE	FALSE	FALSE	FALSE	FALSE
ENSG00000068079	IFI35	response to virus, immune response, cytokine-mediated signaling pathway, type I interferon-mediated signaling pathway, nucleus, cytosol, protein binding	FALSE	FALSE	FALSE	FALSE	FALSE	FALSE	FALSE	FALSE	FALSE	FALSE	FALSE	FALSE
ENSG00000068305	MEF2A	transcription, DNA-dependent, negative regulation of transcription from RNA polymerase II promoter, positive regulation of neuron differentiation, blood vessel remodeling, regulation of transcription, DNA-dependent, positive regulation of cardiac muscle cell proliferation, melanocyte differentiation, cellular response to calcium ion, negative regulation of epithelial cell proliferation, humoral i…	FALSE	FALSE	FALSE	FALSE	FALSE	FALSE	FALSE	FALSE	FALSE	FALSE	FALSE	FALSE
ENSG00000068697	LAPTM4A	transport, integral to membrane, Golgi apparatus, endomembrane system	FALSE	FALSE	FALSE	FALSE	FALSE	FALSE	FALSE	FALSE	FALSE	FALSE	FALSE	FALSE
ENSG00000068793	CYFIP1	lamellipodium assembly, perinuclear region of cytoplasm, lamellipodium, mRNA cap binding complex, regulation of cell shape, ruffle organization, axon extension, cytoplasm, cell junction, neuron projection, ruffle, synapse, protein binding, actin filament binding, Rac GTPase binding	FALSE	FALSE	FALSE	FALSE	FALSE	FALSE	FALSE	FALSE	FALSE	FALSE	FALSE	FALSE
ENSG00000068903	SIRT2	mitosis, cell division, negative regulation of transcription, DNA-dependent, negative regulation of striated muscle tissue development, proteasomal ubiquitin-dependent protein catabolic process, protein ADP-ribosylation, regulation of phosphorylation, histone deacetylation, regulation of exit from mitosis, protein deacetylation, gene silencing, chromatin silencing at rDNA, chromatin silencing, ch…	FALSE	FALSE	FALSE	FALSE	FALSE	FALSE	FALSE	FALSE	FALSE	FALSE	FALSE	FALSE
ENSG00000068971	PPP2R5B	signal transduction, cellular response to growth factor stimulus, regulation of peptidyl-tyrosine phosphorylation, positive regulation of neuron projection development, positive regulation of sequence-specific DNA binding transcription factor activity, regulation of receptor activity, regulation of protein autophosphorylation, positive regulation of protein complex assembly, positive regulation o…	TRUE	FALSE	FALSE	FALSE	FALSE	FALSE	FALSE	FALSE	FALSE	FALSE	FALSE	FALSE
ENSG00000070182	SPTB	protein binding, phospholipid binding, axon guidance, hemopoiesis, porphyrin-containing compound biosynthetic process, plasma membrane organization, actin filament capping, cytoplasm, cytosol, cell surface, protein complex, actin cytoskeleton, spectrin, intrinsic to internal side of plasma membrane, spectrin-associated cytoskeleton, protein heterodimerization activity, actin binding, actin filame…	TRUE	FALSE	FALSE	FALSE	FALSE	FALSE	FALSE	FALSE	FALSE	FALSE	FALSE	FALSE
ENSG00000070495	JMJD6	transcription, DNA-dependent, apoptotic process, heart development, regulation of transcription, DNA-dependent, lung development, mRNA processing, RNA splicing, retina development in camera-type eye, recognition of apoptotic cell, cell surface receptor signaling pathway, kidney development, T cell differentiation in thymus, sprouting angiogenesis, erythrocyte development, macrophage activation, r…	TRUE	FALSE	FALSE	FALSE	FALSE	FALSE	FALSE	FALSE	FALSE	FALSE	FALSE	FALSE
ENSG00000070501	POLB	nucleotidyltransferase activity, DNA repair, base-excision repair, response to DNA damage stimulus, response to ethanol, pyrimidine dimer repair, cell death, DNA-dependent DNA replication, negative regulation of apoptotic process, nucleus, cytoplasm, nucleoplasm, microtubule, spindle microtubule, DNA binding, protein binding, metal ion binding, catalytic activity, enzyme binding, microtubule bind…	FALSE	FALSE	FALSE	FALSE	FALSE	FALSE	FALSE	FALSE	FALSE	FALSE	FALSE	FALSE
ENSG00000072134	EPN2	in utero embryonic development, Notch signaling pathway, regulation of endocytosis, embryonic organ development, endocytosis, clathrin coat of endocytic vesicle, phospholipid binding, lipid binding	TRUE	FALSE	FALSE	FALSE	FALSE	FALSE	FALSE	FALSE	FALSE	FALSE	FALSE	FALSE
ENSG00000072274	TFRC	proteolysis, response to copper ion, response to hypoxia, aging, osteoclast differentiation, response to manganese ion, response to retinoic acid, response to organic substance, cellular iron ion homeostasis, acute-phase response, response to iron ion, positive regulation of bone resorption, mitochondrion, perinuclear region of cytoplasm, external side of plasma membrane, recycling endosome membr…	FALSE	FALSE	FALSE	FALSE	FALSE	FALSE	FALSE	FALSE	FALSE	FALSE	FALSE	FALSE
ENSG00000072401	UBE2D1	transcription, DNA-dependent, ubiquitin-dependent protein catabolic process, negative regulation of transcription from RNA polymerase II promoter, protein polyubiquitination, mitotic cell cycle, cell cycle checkpoint, gene expression, anaphase-promoting complex-dependent proteasomal ubiquitin-dependent protein catabolic process, positive regulation of ubiquitin-protein ligase activity involved in…	TRUE	FALSE	FALSE	FALSE	FALSE	FALSE	FALSE	FALSE	FALSE	FALSE	FALSE	FALSE
ENSG00000072736	NFATC3	regulation of transcription, DNA-dependent, nucleus, sequence-specific DNA binding transcription factor activity, protein binding, , inflammatory response, heart development, positive regulation of transcription from RNA polymerase II promoter, transcription from RNA polymerase II promoter, regulation of transcription from RNA polymerase II promoter, patterning of blood vessels, smooth muscle cel…	TRUE	FALSE	FALSE	FALSE	FALSE	FALSE	FALSE	FALSE	FALSE	FALSE	FALSE	FALSE
ENSG00000072778	ACADVL	oxidation-reduction process, metabolic process, oxidoreductase activity, flavin adenine dinucleotide binding, oxidoreductase activity, acting on the CH-CH group of donors, acyl-CoA dehydrogenase activity, cellular lipid metabolic process, small molecule metabolic process, negative regulation of fatty acid biosynthetic process, regulation of cholesterol metabolic process, temperature homeostasis, …	TRUE	FALSE	FALSE	FALSE	FALSE	FALSE	FALSE	FALSE	FALSE	FALSE	FALSE	FALSE
ENSG00000073060	SCARB1	cell adhesion, integral to membrane, membrane, small molecule metabolic process, lipid metabolic process, cholesterol homeostasis, recognition of apoptotic cell, wound healing, lipoprotein metabolic process, lipopolysaccharide-mediated signaling pathway, positive regulation of triglyceride biosynthetic process, positive regulation of cholesterol storage, low-density lipoprotein particle clearance…	TRUE	FALSE	FALSE	FALSE	FALSE	FALSE	FALSE	FALSE	FALSE	FALSE	FALSE	FALSE
ENSG00000073803	MAP3K13	protein phosphorylation, activation of MAPKK activity, JNK cascade, protein autophosphorylation, positive regulation of NF-kappaB transcription factor activity, membrane, IkappaB kinase complex, protein homodimerization activity, protein binding, ATP binding, protein serine/threonine kinase activity, magnesium ion binding, protein kinase activity, protein tyrosine kinase activity, protein kinase …	TRUE	FALSE	FALSE	FALSE	FALSE	FALSE	FALSE	FALSE	FALSE	FALSE	FALSE	FALSE
ENSG00000074603	DPP8	proteolysis, immune response, nucleus, cytoplasm, membrane, aminopeptidase activity, serine-type peptidase activity, dipeptidyl-peptidase activity	TRUE	FALSE	FALSE	FALSE	FALSE	FALSE	FALSE	FALSE	FALSE	FALSE	FALSE	FALSE
ENSG00000074621	SLC24A1	transmembrane transport, visual perception, calcium ion transport, integral to membrane, calcium, potassium:sodium antiporter activity, ion transport, transport, response to light intensity, plasma membrane, membrane, integral to plasma membrane, outer membrane, symporter activity, protein binding	FALSE	FALSE	FALSE	FALSE	FALSE	FALSE	FALSE	FALSE	FALSE	FALSE	FALSE	FALSE
ENSG00000075234	TTC38		FALSE	FALSE	FALSE	FALSE	FALSE	FALSE	FALSE	FALSE	FALSE	FALSE	FALSE	FALSE
ENSG00000075785	RAB7A	small GTPase mediated signal transduction, protein transport, signal transduction, intracellular protein transport, nucleocytoplasmic transport, endocytosis, protein targeting to lysosome, antigen processing and presentation of exogenous peptide antigen via MHC class II, endosome to lysosome transport, GTP catabolic process, phagosome maturation, early endosome to late endosome transport, epiderm…	FALSE	FALSE	FALSE	FALSE	FALSE	FALSE	FALSE	FALSE	FALSE	FALSE	FALSE	FALSE
ENSG00000075914	EXOSC7	gene expression, RNA metabolic process, mRNA metabolic process, nuclear-transcribed mRNA catabolic process, deadenylation-dependent decay, rRNA processing, RNA catabolic process, exonucleolytic nuclear-transcribed mRNA catabolic process involved in deadenylation-dependent decay, cytosol, nucleolus, exosome (RNase complex), RNA binding, protein binding, 3'-5'-exoribonuclease activity	FALSE	FALSE	FALSE	FALSE	FALSE	FALSE	FALSE	FALSE	FALSE	FALSE	FALSE	FALSE
ENSG00000076641	PAG1	intracellular signal transduction, signal transduction, T cell receptor signaling pathway, epidermal growth factor receptor signaling pathway, negative regulation of T cell activation, regulation of T cell activation, integral to membrane, plasma membrane, intracellular, membrane raft, protein binding, SH2 domain binding, SH3/SH2 adaptor activity	TRUE	FALSE	FALSE	FALSE	FALSE	FALSE	FALSE	FALSE	FALSE	FALSE	FALSE	FALSE
ENSG00000076650	GPATCH1	mRNA splicing, via spliceosome, catalytic step 2 spliceosome, nucleic acid binding	TRUE	FALSE	FALSE	FALSE	FALSE	FALSE	FALSE	FALSE	FALSE	FALSE	FALSE	FALSE
ENSG00000077157	PPP1R12B	signal transduction, positive regulation of catalytic activity, regulation of muscle contraction, cytoplasm, plasma membrane, actin cytoskeleton, protein binding, enzyme activator activity	FALSE	FALSE	FALSE	FALSE	FALSE	FALSE	FALSE	FALSE	FALSE	FALSE	FALSE	FALSE
ENSG00000077232	DNAJC10	negative regulation of protein phosphorylation, protein folding, ER-associated protein catabolic process, cell redox homeostasis, glycerol ether metabolic process, positive regulation of ATPase activity, intrinsic apoptotic signaling pathway in response to endoplasmic reticulum stress, response to endoplasmic reticulum stress, extracellular region, endoplasmic reticulum, endoplasmic reticulum lum…	FALSE	FALSE	FALSE	FALSE	FALSE	FALSE	FALSE	FALSE	FALSE	FALSE	FALSE	FALSE
ENSG00000077463	SIRT6	protein ADP-ribosylation, regulation of double-strand break repair via homologous recombination, nucleus, nucleoplasm, nuclear telomeric heterochromatin, zinc ion binding, protein binding, NAD+ binding, NAD-dependent histone deacetylase activity (H3-K9 specific), NAD(P)+-protein-arginine ADP-ribosyltransferase activity, NAD+ ADP-ribosyltransferase activity, NAD-dependent histone deacetylase activ…	FALSE	FALSE	FALSE	FALSE	FALSE	FALSE	FALSE	FALSE	FALSE	FALSE	FALSE	FALSE
ENSG00000077514	POLD3	DNA replication, DNA-dependent DNA replication, nucleus, mismatch repair, DNA repair, base-excision repair, mitotic cell cycle, S phase of mitotic cell cycle, nucleotide-excision repair, telomere maintenance, transcription-coupled nucleotide-excision repair, DNA strand elongation involved in DNA replication, telomere maintenance via recombination, telomere maintenance via semi-conservative replic…	FALSE	FALSE	FALSE	FALSE	FALSE	FALSE	FALSE	FALSE	FALSE	FALSE	FALSE	FALSE
ENSG00000078043	PIAS2	transcription, DNA-dependent, positive regulation of transcription, DNA-dependent, androgen receptor signaling pathway, protein sumoylation, negative regulation of androgen receptor signaling pathway, positive regulation of transcription from RNA polymerase II promoter, regulation of transcription from RNA polymerase II promoter, regulation of osteoblast differentiation, nucleus, PML body, nuclea…	TRUE	FALSE	FALSE	FALSE	FALSE	FALSE	FALSE	FALSE	FALSE	FALSE	FALSE	FALSE
ENSG00000078142	PIK3C3	cell cycle, innate immune response, small molecule metabolic process, phosphatidylinositol-mediated signaling, phosphatidylinositol phosphorylation, insulin receptor signaling pathway, phospholipid metabolic process, response to leucine, cytokinesis, endosome organization, autophagic vacuole assembly, phosphatidylinositol biosynthetic process, phosphatidylinositol-3-phosphate biosynthetic process…	TRUE	FALSE	FALSE	FALSE	FALSE	FALSE	FALSE	FALSE	FALSE	FALSE	FALSE	FALSE
ENSG00000078269	SYNJ2	small molecule metabolic process, brain development, phosphatidylinositol phosphorylation, inositol phosphate dephosphorylation, phosphatidylinositol dephosphorylation, phospholipid metabolic process, phosphatidylinositol biosynthetic process, intracellular distribution of mitochondria, cytosol, perinuclear region of cytoplasm, cytoplasmic microtubule, extrinsic to mitochondrial outer membrane, r…	TRUE	FALSE	FALSE	FALSE	FALSE	FALSE	FALSE	FALSE	FALSE	FALSE	FALSE	FALSE
ENSG00000078403	MLLT10	zinc ion binding, protein binding, transcription, DNA-dependent, positive regulation of transcription from RNA polymerase II promoter, nucleus, cytoplasm, DNA binding, sequence-specific DNA binding transcription factor activity	TRUE	FALSE	FALSE	FALSE	FALSE	FALSE	FALSE	FALSE	FALSE	FALSE	FALSE	FALSE
ENSG00000078487	ZCWPW1	zinc ion binding	FALSE	FALSE	FALSE	FALSE	FALSE	FALSE	FALSE	FALSE	FALSE	FALSE	FALSE	FALSE
ENSG00000078674	PCM1	cilium assembly, mitotic cell cycle, G2/M transition of mitotic cell cycle, centrosome organization, microtubule anchoring, interkinetic nuclear migration, neuronal stem cell maintenance, microtubule anchoring at centrosome, negative regulation of neurogenesis, protein localization to centrosome, cytoplasm, cytosol, centrosome, nuclear membrane, pericentriolar material, centriolar satellite, prot…	TRUE	FALSE	FALSE	FALSE	FALSE	FALSE	FALSE	FALSE	FALSE	FALSE	FALSE	FALSE
ENSG00000078902	TOLLIP	innate immune response, inflammatory response, intracellular signal transduction, signal transduction, cell-cell signaling, phosphorylation, leukocyte activation, positive regulation of protein sumoylation, cytoplasm, cytosol, interleukin-1 receptor complex, interleukin-18 receptor complex, nuclear body, perinuclear region of cytoplasm, protein binding, kinase binding, signal transducer activity,…	FALSE	FALSE	FALSE	FALSE	FALSE	FALSE	FALSE	FALSE	FALSE	FALSE	FALSE	FALSE
ENSG00000078967	UBE2D4	protein K48-linked ubiquitination, protein K11-linked ubiquitination, protein K63-linked ubiquitination, protein K6-linked ubiquitination, protein K29-linked ubiquitination, protein K27-linked ubiquitination, protein binding, ATP binding, ubiquitin-protein ligase activity, acid-amino acid ligase activity	FALSE	FALSE	FALSE	FALSE	FALSE	FALSE	FALSE	FALSE	FALSE	FALSE	FALSE	FALSE
ENSG00000080345	RIF1	cell cycle, response to DNA damage stimulus, stem cell maintenance, cytoplasm, spindle, chromosome, telomeric region, female pronucleus, male pronucleus, binding, nucleus, protein binding	TRUE	FALSE	FALSE	FALSE	FALSE	FALSE	FALSE	FALSE	FALSE	FALSE	FALSE	FALSE
ENSG00000080802	CNOT4	nucleotide binding, RNA binding, zinc ion binding, protein binding, nucleic acid binding, transcription, DNA-dependent, regulation of transcription, DNA-dependent, gene expression, RNA metabolic process, mRNA metabolic process, nuclear-transcribed mRNA poly(A) tail shortening, nuclear-transcribed mRNA catabolic process, deadenylation-dependent decay, protein autoubiquitination, nucleus, cytosol, …	TRUE	FALSE	FALSE	FALSE	FALSE	FALSE	FALSE	FALSE	FALSE	FALSE	FALSE	FALSE
ENSG00000080822	CLDND1	apical plasma membrane, integral to membrane, membrane	FALSE	FALSE	FALSE	FALSE	FALSE	FALSE	FALSE	FALSE	FALSE	FALSE	FALSE	FALSE
ENSG00000080823	MOK	protein phosphorylation, ATP binding, protein kinase activity, transferase activity, transferring phosphorus-containing groups, protein serine/threonine kinase activity, protein tyrosine kinase activity, signal transduction, cytoplasm, cyclin-dependent protein kinase activity	FALSE	FALSE	FALSE	FALSE	FALSE	FALSE	FALSE	FALSE	FALSE	FALSE	FALSE	FALSE
ENSG00000080824	HSP90AA1	axon guidance, small molecule metabolic process, protein folding, mitotic cell cycle, signal transduction, ATP catabolic process, response to stress, G2/M transition of mitotic cell cycle, positive regulation of nitric oxide biosynthetic process, mitochondrial transport, regulation of nitric-oxide synthase activity, protein refolding, nitric oxide metabolic process, response to unfolded protein, …	FALSE	FALSE	FALSE	FALSE	FALSE	FALSE	FALSE	FALSE	FALSE	FALSE	FALSE	FALSE
ENSG00000081014	AP4E1	intracellular protein transport, vesicle-mediated transport, membrane coat, binding, COPI vesicle coat, structural molecule activity	TRUE	FALSE	FALSE	FALSE	FALSE	FALSE	FALSE	FALSE	FALSE	FALSE	FALSE	FALSE
ENSG00000081019	RSBN1	nucleus, protein binding	FALSE	FALSE	FALSE	FALSE	FALSE	FALSE	FALSE	FALSE	FALSE	FALSE	FALSE	FALSE
ENSG00000082014	SMARCD3	transcription, DNA-dependent, positive regulation of transcription, DNA-dependent, cellular lipid metabolic process, small molecule metabolic process, chromatin remodeling, positive regulation of neuroblast proliferation, regulation of transcription from RNA polymerase II promoter, regulation of protein binding, muscle cell differentiation, neural retina development, secondary heart field specifi…	FALSE	FALSE	FALSE	FALSE	FALSE	FALSE	FALSE	FALSE	FALSE	FALSE	FALSE	FALSE
ENSG00000083097	DOPEY1	protein transport, binding, endoplasmic reticulum organization, Golgi to endosome transport, Golgi membrane	TRUE	FALSE	FALSE	FALSE	FALSE	FALSE	FALSE	FALSE	FALSE	FALSE	FALSE	FALSE
ENSG00000083312	TNPO1	gene expression, RNA metabolic process, mRNA metabolic process, intracellular protein transport, protein import into nucleus, translocation, virus-host interaction, nucleus, cytoplasm, cytosol, nuclear pore, protein binding, protein transporter activity, nuclear localization sequence binding, binding, intracellular	TRUE	FALSE	FALSE	FALSE	FALSE	FALSE	FALSE	FALSE	FALSE	FALSE	FALSE	FALSE
ENSG00000083844	ZNF264	transcription, DNA-dependent, regulation of transcription, DNA-dependent, nucleus, intracellular, DNA binding, zinc ion binding, nucleic acid binding	TRUE	FALSE	FALSE	FALSE	FALSE	FALSE	FALSE	FALSE	FALSE	FALSE	FALSE	FALSE
ENSG00000084764	MAPRE3	cell cycle, positive regulation of transcription, DNA-dependent, mitosis, cell division, cytoplasm, perinuclear region of cytoplasm, microtubule, cytoplasmic microtubule, midbody, protein binding, microtubule binding, small GTPase regulator activity	FALSE	FALSE	FALSE	FALSE	FALSE	FALSE	FALSE	FALSE	FALSE	FALSE	FALSE	FALSE
ENSG00000085788	DDHD2	lipid catabolic process, cytoplasm, centrosome, protein binding, metal ion binding, hydrolase activity	FALSE	FALSE	FALSE	FALSE	FALSE	FALSE	TRUE	FALSE	FALSE	FALSE	FALSE	FALSE
ENSG00000086102	NFX1	negative regulation of transcription from RNA polymerase II promoter, inflammatory response, regulation of transcription, DNA-dependent, transcription from RNA polymerase II promoter, virus-host interaction, negative regulation of MHC class II biosynthetic process, nucleus, DNA binding, sequence-specific DNA binding transcription factor activity, zinc ion binding, protein binding, ligase activity…	TRUE	FALSE	FALSE	FALSE	FALSE	FALSE	FALSE	TRUE	FALSE	FALSE	FALSE	FALSE
ENSG00000086232	EIF2AK1	negative regulation of cell proliferation, protein phosphorylation, response to stress, protein autophosphorylation, response to external stimulus, regulation of eIF2 alpha phosphorylation by heme, protoporphyrinogen IX metabolic process, negative regulation of translational initiation by iron, negative regulation of hemoglobin biosynthetic process, regulation of translation, regulation of hemogl…	FALSE	FALSE	FALSE	FALSE	FALSE	FALSE	FALSE	FALSE	FALSE	FALSE	FALSE	FALSE
ENSG00000086504	MRPL28	cytoplasm, mitochondrion, ribosome, structural constituent of ribosome, translation, mitochondrial ribosome, protein binding	FALSE	FALSE	FALSE	FALSE	FALSE	FALSE	FALSE	FALSE	FALSE	FALSE	FALSE	FALSE
ENSG00000087053	MTMR2	small molecule metabolic process, negative regulation of receptor internalization, inositol phosphate dephosphorylation, phosphatidylinositol dephosphorylation, protein tetramerization, regulation of excitatory postsynaptic membrane potential, protein dephosphorylation, phospholipid metabolic process, negative regulation of endocytosis, dephosphorylation, phosphatidylinositol biosynthetic process…	TRUE	FALSE	FALSE	FALSE	FALSE	FALSE	FALSE	FALSE	FALSE	FALSE	FALSE	FALSE
ENSG00000087157	PGS1	small molecule metabolic process, metabolic process, phospholipid biosynthetic process, phospholipid metabolic process, diacylglycerol metabolic process, glycerophospholipid biosynthetic process, phosphatidylglycerol biosynthetic process, cardiolipin biosynthetic process, mitochondrion, endoplasmic reticulum, mitochondrial inner membrane, ATP binding, calcium ion binding, catalytic activity, phos…	FALSE	FALSE	FALSE	FALSE	FALSE	FALSE	FALSE	FALSE	FALSE	FALSE	FALSE	FALSE
ENSG00000088205	DDX18	nucleolus, RNA binding, protein binding, ATP binding, nucleic acid binding, ATP-dependent helicase activity, helicase activity, ATP-dependent RNA helicase activity	TRUE	FALSE	FALSE	FALSE	FALSE	FALSE	FALSE	FALSE	FALSE	FALSE	FALSE	FALSE
ENSG00000088387	DOCK9	binding, biological_process, blood coagulation, cellular_component, cytosol, membrane, endomembrane system, protein binding, phospholipid binding, GTP binding, Rho guanyl-nucleotide exchange factor activity, Rho GTPase binding	TRUE	FALSE	FALSE	FALSE	FALSE	FALSE	FALSE	FALSE	FALSE	FALSE	FALSE	FALSE
ENSG00000089009	RPL6	translation, regulation of transcription, DNA-dependent, viral reproduction, gene expression, RNA metabolic process, mRNA metabolic process, translational elongation, cellular protein metabolic process, SRP-dependent cotranslational protein targeting to membrane, translational initiation, viral infectious cycle, nuclear-transcribed mRNA catabolic process, nonsense-mediated decay, translational te…	FALSE	FALSE	FALSE	FALSE	FALSE	FALSE	FALSE	FALSE	FALSE	FALSE	FALSE	FALSE
ENSG00000089094	KDM2B	transcription, DNA-dependent, negative regulation of transcription from RNA polymerase II promoter, spermatogenesis, negative regulation of neural precursor cell proliferation, hindbrain development, negative regulation of neuron apoptotic process, embryonic camera-type eye morphogenesis, forebrain development, lateral ventricle development, midbrain development, third ventricle development, four…	FALSE	FALSE	FALSE	FALSE	FALSE	FALSE	FALSE	FALSE	FALSE	FALSE	FALSE	FALSE
ENSG00000089505	CMTM1	chemotaxis, integral to membrane, extracellular space, cytokine activity, , membrane	FALSE	FALSE	FALSE	FALSE	FALSE	FALSE	FALSE	FALSE	FALSE	FALSE	FALSE	FALSE
ENSG00000089737	DDX24	RNA metabolic process, cytoplasm, nucleolus, RNA binding, ATP binding, nucleic acid binding, ATP-dependent helicase activity, helicase activity, RNA helicase activity, ATP-dependent RNA helicase activity	FALSE	FALSE	FALSE	FALSE	FALSE	FALSE	FALSE	FALSE	FALSE	FALSE	FALSE	FALSE
ENSG00000090686	USP48	ubiquitin-dependent protein catabolic process, nucleus, cytoplasm, mitochondrion, ubiquitin thiolesterase activity, cysteine-type peptidase activity	FALSE	FALSE	FALSE	FALSE	FALSE	FALSE	FALSE	FALSE	FALSE	FALSE	FALSE	FALSE
ENSG00000091157	WDR7	protein binding, binding	TRUE	FALSE	FALSE	FALSE	FALSE	FALSE	FALSE	FALSE	FALSE	FALSE	FALSE	FALSE
ENSG00000091164	TXNL1	electron transport chain, cell redox homeostasis, glycerol ether metabolic process, nucleus, cytoplasm, proteasome complex, electron carrier activity, protein disulfide oxidoreductase activity, disulfide oxidoreductase activity	FALSE	FALSE	FALSE	FALSE	FALSE	FALSE	FALSE	FALSE	FALSE	FALSE	FALSE	FALSE
ENSG00000091542	ALKBH5	metal ion binding, oxidoreductase activity, acting on single donors with incorporation of molecular oxygen, incorporation of two atoms of oxygen, oxidoreductase activity, acting on paired donors, with incorporation or reduction of molecular oxygen, 2-oxoglutarate as one donor, and incorporation of one atom each of oxygen into both donors	FALSE	FALSE	FALSE	FALSE	FALSE	FALSE	FALSE	FALSE	FALSE	FALSE	FALSE	FALSE
ENSG00000092020	PPP2R3C	nucleus, centrosome, calcium ion binding, protein binding	TRUE	FALSE	FALSE	FALSE	FALSE	FALSE	FALSE	FALSE	FALSE	FALSE	FALSE	FALSE
ENSG00000092036	HAUS4	mitosis, cell division, spindle assembly, centrosome organization, centrosome, spindle, microtubule, HAUS complex, molecular_function	TRUE	FALSE	FALSE	FALSE	FALSE	FALSE	FALSE	FALSE	FALSE	FALSE	FALSE	FALSE
ENSG00000093144	ECHDC1	metabolic process, cytosol, catalytic activity, carboxy-lyase activity, methylmalonyl-CoA decarboxylase activity	TRUE	FALSE	FALSE	FALSE	FALSE	FALSE	FALSE	FALSE	FALSE	FALSE	FALSE	FALSE
ENSG00000095397	DFNB31	sensory perception of sound, inner ear receptor stereocilium organization, retina homeostasis, sensory perception of light stimulus, cytoplasm, axon, neuronal cell body, growth cone, photoreceptor connecting cilium, stereocilium, dendritic shaft, photoreceptor inner segment, synapse, actin filament, stereocilia ankle link complex, protein binding, protein domain specific binding, cilium, stereoci…	TRUE	FALSE	FALSE	FALSE	FALSE	FALSE	FALSE	FALSE	FALSE	FALSE	FALSE	FALSE
ENSG00000095574	IKZF5	transcription, DNA-dependent, regulation of transcription, DNA-dependent, nucleus, intracellular, DNA binding, zinc ion binding	FALSE	FALSE	FALSE	FALSE	FALSE	FALSE	FALSE	FALSE	FALSE	FALSE	FALSE	FALSE
ENSG00000096063	SRPK1	innate immune response, mRNA processing, RNA splicing, negative regulation of viral genome replication, protein phosphorylation, chromosome segregation, intracellular protein kinase cascade, regulation of mRNA processing, virus-host interaction, positive regulation of viral genome replication, regulation of mRNA splicing, via spliceosome, sperm chromatin condensation, nucleus, cytoplasm, endoplas…	TRUE	FALSE	FALSE	FALSE	FALSE	FALSE	FALSE	FALSE	FALSE	FALSE	FALSE	FALSE
ENSG00000099139	PCSK5	proteolysis, serine-type endopeptidase activity, heart development, embryo implantation, cell-cell signaling, embryonic skeletal system development, anterior/posterior pattern specification, kidney development, signal peptide processing, protein processing, limb morphogenesis, peptide hormone processing, peptide biosynthetic process, nerve growth factor receptor signaling pathway, embryonic diges…	TRUE	FALSE	FALSE	FALSE	FALSE	FALSE	FALSE	FALSE	FALSE	FALSE	FALSE	FALSE
ENSG00000099203	TMED1	protein transport, signal transduction, transport, cell-cell signaling, integral to membrane, plasma membrane, endoplasmic reticulum membrane, endoplasmic reticulum, Golgi apparatus, endoplasmic reticulum-Golgi intermediate compartment, endoplasmic reticulum-Golgi intermediate compartment membrane, protein binding, receptor binding	FALSE	FALSE	FALSE	FALSE	FALSE	FALSE	FALSE	FALSE	FALSE	FALSE	FALSE	FALSE
ENSG00000099330	OCEL1		TRUE	FALSE	FALSE	FALSE	FALSE	FALSE	FALSE	FALSE	FALSE	FALSE	FALSE	FALSE
ENSG00000099785	MARCH2	protein ubiquitination, endocytosis, integral to membrane, endoplasmic reticulum membrane, endoplasmic reticulum, endosome membrane, cytoplasmic vesicle, lysosomal membrane, zinc ion binding, protein binding, ubiquitin-protein ligase activity	FALSE	FALSE	FALSE	FALSE	FALSE	FALSE	FALSE	FALSE	FALSE	FALSE	FALSE	FALSE
ENSG00000099804	CDC34	protein ubiquitination, protein polyubiquitination, cellular protein modification process, DNA replication initiation, proteasomal ubiquitin-dependent protein catabolic process, G1/S transition of mitotic cell cycle, protein K48-linked ubiquitination, negative regulation of cAMP-mediated signaling, nucleus, cytoplasm, protein binding, ATP binding, ubiquitin-protein ligase activity, acid-amino aci…	TRUE	FALSE	FALSE	FALSE	FALSE	FALSE	FALSE	FALSE	FALSE	FALSE	FALSE	FALSE
ENSG00000099810	MTAP	small molecule metabolic process, cellular nitrogen compound metabolic process, nucleoside metabolic process, purine ribonucleoside salvage, L-methionine salvage from methylthioadenosine, nucleobase-containing compound metabolic process, sulfur amino acid metabolic process, polyamine metabolic process, response to testosterone stimulus, nucleus, cytosol, catalytic activity, phosphorylase activity…	FALSE	FALSE	FALSE	FALSE	FALSE	FALSE	TRUE	FALSE	FALSE	FALSE	FALSE	FALSE
ENSG00000099991	CABIN1	protein binding, cell surface receptor signaling pathway, chromatin modification, negative regulation of cell death, nucleus, cytoplasm, aggresome, protein domain specific binding, protein phosphatase inhibitor activity, protein phosphatase 2B binding	FALSE	FALSE	FALSE	FALSE	FALSE	FALSE	FALSE	FALSE	FALSE	FALSE	FALSE	FALSE
ENSG00000099999	RNF215	integral to membrane, zinc ion binding, protein binding	TRUE	FALSE	FALSE	FALSE	FALSE	FALSE	FALSE	FALSE	FALSE	FALSE	FALSE	FALSE
ENSG00000100034	PPM1F	negative regulation of transcription, DNA-dependent, protein dephosphorylation, positive regulation of cell-substrate adhesion, positive regulation of stress fiber assembly, positive regulation of gene expression, cellular response to drug, positive regulation of focal adhesion assembly, positive regulation of epithelial cell migration, negative regulation of peptidyl-serine phosphorylation, nega…	TRUE	FALSE	FALSE	FALSE	FALSE	FALSE	FALSE	FALSE	FALSE	FALSE	FALSE	FALSE
ENSG00000100036	SLC35E4	transmembrane transport, integral to membrane, membrane	FALSE	FALSE	FALSE	FALSE	FALSE	FALSE	FALSE	FALSE	FALSE	FALSE	FALSE	FALSE
ENSG00000100060	MFNG	pattern specification process, positive regulation of protein binding, positive regulation of Notch signaling pathway, membrane, extracellular space, integral to Golgi membrane, metal ion binding, transferase activity, transferring glycosyl groups, O-fucosylpeptide 3-beta-N-acetylglucosaminyltransferase activity, protein binding	TRUE	FALSE	FALSE	FALSE	FALSE	FALSE	FALSE	FALSE	FALSE	FALSE	FALSE	FALSE
ENSG00000100075	SLC25A1	triglyceride biosynthetic process, long-chain fatty-acyl-CoA biosynthetic process, cellular lipid metabolic process, small molecule metabolic process, transport, carbohydrate metabolic process, glucose metabolic process, gluconeogenesis, mitochondrial citrate transport, integral to membrane, mitochondrial inner membrane, mitochondrion, citrate transmembrane transporter activity	TRUE	FALSE	FALSE	FALSE	FALSE	FALSE	FALSE	FALSE	FALSE	FALSE	FALSE	FALSE
ENSG00000100100	PIK3IP1	negative regulation of phosphatidylinositol 3-kinase cascade, negative regulation of phosphatidylinositol 3-kinase activity, integral to membrane, phosphatidylinositol 3-kinase catalytic subunit binding, , kinase activity	FALSE	FALSE	FALSE	FALSE	FALSE	FALSE	FALSE	FALSE	FALSE	FALSE	FALSE	FALSE
ENSG00000100109	TFIP11	biomineral tissue development, regulation of transcription, DNA-dependent, RNA processing, mRNA splicing, via spliceosome, nucleus, cytoplasm, proteinaceous extracellular matrix, spliceosomal complex, nuclear speck, catalytic step 2 spliceosome, DNA binding, nucleic acid binding, protein binding	TRUE	FALSE	FALSE	FALSE	FALSE	FALSE	FALSE	FALSE	FALSE	FALSE	FALSE	FALSE
ENSG00000100151	PICK1	protein phosphorylation, protein targeting, receptor clustering, mitochondrion, perinuclear region of cytoplasm, protein complex, postsynaptic density, protein domain specific binding, receptor binding, protein C-terminus binding, identical protein binding, protein kinase C binding, protein kinase C-activating G-protein coupled receptor signaling pathway, ATP catabolic process, retrograde vesicle…	TRUE	FALSE	FALSE	FALSE	FALSE	FALSE	FALSE	FALSE	FALSE	FALSE	FALSE	FALSE
ENSG00000100239	PPP6R2	cytoplasm, intracellular membrane-bounded organelle, protein binding, binding	TRUE	FALSE	FALSE	FALSE	FALSE	FALSE	FALSE	FALSE	FALSE	FALSE	FALSE	FALSE
ENSG00000100246	DNAL4	microtubule-based movement, microtubule-based process, nerve growth factor receptor signaling pathway, cytoplasm, plasma membrane, microtubule, cilium axoneme, microtubule associated complex, axonemal dynein complex, microtubule motor activity, ATPase activity, coupled	TRUE	FALSE	FALSE	FALSE	FALSE	FALSE	TRUE	FALSE	FALSE	FALSE	FALSE	FALSE
ENSG00000100294	MCAT	metabolic process, fatty acid biosynthetic process, mitochondrion, transferase activity, [acyl-carrier-protein] S-malonyltransferase activity, protein binding, catalytic activity	TRUE	FALSE	FALSE	FALSE	FALSE	FALSE	FALSE	FALSE	FALSE	FALSE	FALSE	FALSE
ENSG00000100297	MCM5	mitotic cell cycle, cell cycle checkpoint, S phase of mitotic cell cycle, M/G1 transition of mitotic cell cycle, DNA replication, DNA replication initiation, G1/S transition of mitotic cell cycle, DNA strand elongation involved in DNA replication, nucleus, nucleoplasm, MCM complex, DNA binding, protein binding, ATP binding, helicase activity, , cell division	TRUE	FALSE	FALSE	FALSE	FALSE	FALSE	FALSE	FALSE	FALSE	FALSE	FALSE	FALSE
ENSG00000100300	TSPO	cell proliferation, apoptotic process, response to drug, positive regulation of apoptotic process, steroid biosynthetic process, glial cell migration, aging, response to progesterone stimulus, protein targeting to mitochondrion, peripheral nervous system axon regeneration, response to manganese ion, response to vitamin B1, positive regulation of necrotic cell death, adrenal gland development, neg…	FALSE	FALSE	FALSE	FALSE	FALSE	FALSE	TRUE	FALSE	FALSE	FALSE	FALSE	FALSE
ENSG00000100316	RPL3	translation, cytoplasm, intracellular, nucleolus, ribosome, structural constituent of ribosome, viral reproduction, gene expression, RNA metabolic process, mRNA metabolic process, translational elongation, cellular protein metabolic process, SRP-dependent cotranslational protein targeting to membrane, translational initiation, viral infectious cycle, nuclear-transcribed mRNA catabolic process, no…	FALSE	FALSE	FALSE	FALSE	FALSE	FALSE	FALSE	FALSE	FALSE	FALSE	FALSE	FALSE
ENSG00000100319	ZMAT5	mRNA processing, RNA splicing, nucleus, cytoplasm, U12-type spliceosomal complex, zinc ion binding, nucleic acid binding	FALSE	FALSE	FALSE	FALSE	FALSE	FALSE	FALSE	FALSE	FALSE	FALSE	FALSE	FALSE
ENSG00000100364	KIAA0930		TRUE	FALSE	FALSE	FALSE	FALSE	FALSE	FALSE	FALSE	FALSE	FALSE	FALSE	FALSE
ENSG00000100413	POLR3H	transcription, DNA-dependent, innate immune response, gene expression, transcription from RNA polymerase III promoter, defense response to virus, nucleobase-containing compound metabolic process, transcription elongation from RNA polymerase III promoter, termination of RNA polymerase III transcription, nucleus, intracellular membrane-bounded organelle, centrosome, nucleoplasm, DNA-directed RNA po…	TRUE	FALSE	FALSE	FALSE	FALSE	FALSE	FALSE	FALSE	FALSE	FALSE	FALSE	FALSE
ENSG00000100523	DDHD1	lipid catabolic process, cytoplasm, metal ion binding, hydrolase activity	FALSE	FALSE	FALSE	FALSE	FALSE	FALSE	FALSE	FALSE	FALSE	FALSE	FALSE	FALSE
ENSG00000100567	PSMA3	ubiquitin-dependent protein catabolic process, apoptotic process, regulation of apoptotic process, small molecule metabolic process, protein polyubiquitination, antigen processing and presentation of peptide antigen via MHC class I, proteolysis involved in cellular protein catabolic process, mitotic cell cycle, viral reproduction, cell cycle checkpoint, S phase of mitotic cell cycle, M/G1 transit…	FALSE	FALSE	FALSE	FALSE	FALSE	FALSE	FALSE	FALSE	FALSE	FALSE	FALSE	FALSE
ENSG00000100578	KIAA0586	cilium morphogenesis, smoothened signaling pathway, centrosome	FALSE	FALSE	FALSE	FALSE	FALSE	FALSE	FALSE	FALSE	FALSE	FALSE	FALSE	FALSE
ENSG00000100580	TMED8	transport, integral to membrane	TRUE	FALSE	FALSE	FALSE	FALSE	FALSE	FALSE	FALSE	FALSE	FALSE	FALSE	FALSE
ENSG00000100650	SRSF5	response to wounding, gene expression, mRNA processing, RNA splicing, transcription from RNA polymerase II promoter, regulation of cell cycle, mRNA splice site selection, mRNA export from nucleus, mRNA splicing, via spliceosome, termination of RNA polymerase II transcription, mRNA 3'-end processing, nucleus, cytoplasm, nucleolus, nucleoplasm, nuclear speck, nucleotide binding, RNA binding, protei…	FALSE	FALSE	FALSE	FALSE	FALSE	FALSE	FALSE	FALSE	FALSE	FALSE	TRUE	FALSE
ENSG00000100890		tRNA processing, mitochondrion	TRUE	FALSE	FALSE	FALSE	FALSE	FALSE	FALSE	FALSE	FALSE	FALSE	FALSE	FALSE
ENSG00000100908	EMC9	cytoplasm, ER membrane protein complex	TRUE	FALSE	FALSE	FALSE	FALSE	FALSE	FALSE	FALSE	FALSE	FALSE	FALSE	FALSE
ENSG00000101040	ZMYND8	negative regulation of transcription from RNA polymerase II promoter, nucleus, zinc ion binding, protein binding, kinase activity, repressing transcription factor binding, RNA polymerase II transcription corepressor activity	FALSE	FALSE	FALSE	FALSE	FALSE	FALSE	FALSE	FALSE	FALSE	FALSE	FALSE	FALSE
ENSG00000101158	TH1L	negative regulation of transcription, DNA-dependent, viral reproduction, gene expression, transcription from RNA polymerase II promoter, transcription elongation from RNA polymerase II promoter, positive regulation of viral transcription, nucleus, nucleoplasm, NELF complex, protein binding	TRUE	FALSE	FALSE	FALSE	FALSE	FALSE	TRUE	FALSE	FALSE	FALSE	FALSE	FALSE
ENSG00000101182	PSMA7	proteolysis involved in cellular protein catabolic process, proteasome core complex, threonine-type endopeptidase activity, ubiquitin-dependent protein catabolic process, apoptotic process, regulation of apoptotic process, small molecule metabolic process, protein polyubiquitination, antigen processing and presentation of peptide antigen via MHC class I, mitotic cell cycle, viral reproduction, ce…	FALSE	FALSE	FALSE	FALSE	FALSE	FALSE	FALSE	FALSE	FALSE	FALSE	FALSE	FALSE
ENSG00000101189	MRGBP	transcription, DNA-dependent, regulation of transcription, DNA-dependent, regulation of growth, chromatin modification, nucleus, H4/H2A histone acetyltransferase complex	TRUE	FALSE	FALSE	FALSE	FALSE	FALSE	FALSE	FALSE	FALSE	FALSE	FALSE	FALSE
ENSG00000101190	TCFL5	cell differentiation, multicellular organismal development, spermatogenesis, regulation of transcription, DNA-dependent, regulation of cell differentiation, transcription from RNA polymerase II promoter, regulation of cell proliferation, nucleus, male germ cell nucleus, DNA binding, sequence-specific DNA binding transcription factor activity, protein dimerization activity	TRUE	FALSE	FALSE	FALSE	FALSE	FALSE	FALSE	FALSE	FALSE	FALSE	FALSE	FALSE
ENSG00000101294	HM13	membrane protein proteolysis, integral to membrane, plasma membrane, endoplasmic reticulum, cell surface, rough endoplasmic reticulum, integral to lumenal side of endoplasmic reticulum membrane, integral to cytosolic side of endoplasmic reticulum membrane, protein homodimerization activity, protein binding, aspartic-type endopeptidase activity, peptidase activity, aspartic endopeptidase activity,…	TRUE	FALSE	FALSE	FALSE	FALSE	FALSE	FALSE	FALSE	FALSE	FALSE	FALSE	FALSE
ENSG00000101347	SAMHD1	innate immune response, immune response, defense response to virus, regulation of innate immune response, nucleus, intracellular, RNA binding, protein binding, nucleic acid binding, metal ion binding, catalytic activity, phosphoric diester hydrolase activity	TRUE	FALSE	FALSE	FALSE	FALSE	FALSE	FALSE	FALSE	FALSE	FALSE	FALSE	FALSE
ENSG00000101350	KIF3B	determination of left/right symmetry, microtubule-based movement, blood coagulation, antigen processing and presentation of exogenous peptide antigen via MHC class II, mitotic spindle organization, anterograde axon cargo transport, spindle assembly involved in mitosis, mitotic centrosome separation, plus-end-directed vesicle transport along microtubule, cytosol, centrosome, microtubule associated…	FALSE	FALSE	FALSE	FALSE	FALSE	FALSE	FALSE	FALSE	FALSE	FALSE	FALSE	FALSE
ENSG00000102531	FNDC3A	fertilization, spermatid development, cell-cell adhesion, Sertoli cell development, integral to membrane, cytosol, Golgi membrane, Golgi apparatus, acrosomal vesicle, vesicle membrane, cytoplasmic vesicle, protein binding	FALSE	FALSE	FALSE	FALSE	FALSE	FALSE	FALSE	FALSE	FALSE	FALSE	FALSE	FALSE
ENSG00000102543	CDADC1	zinc ion binding, catalytic activity, hydrolase activity	FALSE	FALSE	FALSE	FALSE	FALSE	FALSE	FALSE	FALSE	FALSE	FALSE	FALSE	FALSE
ENSG00000102547	CAB39L	cell cycle arrest, insulin receptor signaling pathway, regulation of fatty acid oxidation, cytosol, binding	TRUE	FALSE	FALSE	FALSE	FALSE	FALSE	FALSE	FALSE	FALSE	FALSE	FALSE	FALSE
ENSG00000102580	DNAJC3	protein folding, proteolysis involved in cellular protein catabolic process, defense response to virus, negative regulation of protein kinase activity, endoplasmic reticulum unfolded protein response, activation of signaling protein activity involved in unfolded protein response, cytoplasm, endoplasmic reticulum lumen, endoplasmic reticulum Sec complex, protein binding, chaperone binding, unfolde…	FALSE	FALSE	FALSE	FALSE	FALSE	FALSE	FALSE	FALSE	FALSE	FALSE	FALSE	FALSE
ENSG00000102796	DHRS12	metabolic process, cellular metabolic process, nucleotide binding, oxidoreductase activity, catalytic activity, coenzyme binding	TRUE	FALSE	FALSE	FALSE	FALSE	FALSE	FALSE	FALSE	FALSE	FALSE	FALSE	FALSE
ENSG00000102893	PHKB	glycogen metabolic process, polysaccharide metabolic process, catalytic activity, hydrolase activity, hydrolyzing O-glycosyl compounds, calmodulin binding, small molecule metabolic process, carbohydrate metabolic process, glucose metabolic process, glycogen catabolic process, generation of precursor metabolites and energy, plasma membrane, cytosol, phosphorylase kinase complex, phosphorylase kina…	FALSE	FALSE	FALSE	FALSE	FALSE	FALSE	TRUE	FALSE	FALSE	FALSE	FALSE	FALSE
ENSG00000102910	LONP2	proteolysis, response to organic cyclic compound, regulation of fatty acid beta-oxidation, protein targeting to peroxisome, peroxisome organization, signal peptide processing, misfolded or incompletely synthesized protein catabolic process, nucleus, peroxisome, nucleoid, peroxisomal matrix, cytoplasm, nucleotide binding, protein binding, ATP binding, serine-type endopeptidase activity, sequence-s…	TRUE	FALSE	FALSE	FALSE	FALSE	FALSE	FALSE	FALSE	FALSE	FALSE	FALSE	FALSE
ENSG00000102967	DHODH	oxidation-reduction process, 'de novo' pyrimidine nucleobase biosynthetic process, UMP biosynthetic process, membrane, dihydroorotate dehydrogenase activity, dihydroorotate oxidase activity, , small molecule metabolic process, positive regulation of apoptotic process, 'de novo' UMP biosynthetic process, pyrimidine nucleobase metabolic process, nucleobase-containing small molecule metabolic proces…	FALSE	FALSE	FALSE	FALSE	FALSE	FALSE	FALSE	FALSE	FALSE	FALSE	FALSE	FALSE
ENSG00000102978	POLR2C	transcription, DNA-dependent, DNA repair, viral reproduction, gene expression, RNA splicing, transcription initiation from RNA polymerase II promoter, transcription from RNA polymerase II promoter, nucleotide-excision repair, transcription elongation from RNA polymerase II promoter, 7-methylguanosine mRNA capping, mRNA splicing, via spliceosome, transcription-coupled nucleotide-excision repair, p…	TRUE	FALSE	FALSE	FALSE	FALSE	FALSE	FALSE	FALSE	FALSE	FALSE	FALSE	FALSE
ENSG00000103037	SETD6	negative regulation of NF-kappaB transcription factor activity, regulation of inflammatory response, peptidyl-lysine monomethylation, nucleus, protein binding, NF-kappaB binding, protein-lysine N-methyltransferase activity	FALSE	FALSE	FALSE	FALSE	FALSE	FALSE	FALSE	FALSE	FALSE	FALSE	FALSE	FALSE
ENSG00000103056	SMPD3	cell cycle, multicellular organismal development, small molecule metabolic process, phospholipid metabolic process, sphingolipid metabolic process, glycosphingolipid metabolic process, sphingomyelin catabolic process, peptide hormone secretion, sphingomyelin metabolic process, plasma membrane, Golgi membrane, Golgi cis cisterna, Golgi apparatus, metal ion binding, sphingomyelin phosphodiesterase …	FALSE	FALSE	FALSE	FALSE	FALSE	FALSE	TRUE	FALSE	FALSE	FALSE	FALSE	FALSE
ENSG00000103064	SLC7A6	transmembrane transport, ion transport, transport, amino acid transport, protein complex assembly, cellular amino acid metabolic process, leukocyte migration, blood coagulation, amino acid transmembrane transport, integral to membrane, plasma membrane, membrane, basolateral plasma membrane, integral to plasma membrane, amino acid transmembrane transporter activity, antiporter activity	TRUE	FALSE	FALSE	FALSE	FALSE	FALSE	FALSE	FALSE	FALSE	FALSE	FALSE	FALSE
ENSG00000103148	NPRL3	biological_process, cellular_component, molecular_function	FALSE	FALSE	FALSE	FALSE	FALSE	FALSE	FALSE	FALSE	FALSE	FALSE	FALSE	FALSE
ENSG00000103194	USP10	ubiquitin-dependent protein catabolic process, autophagy, DNA repair, regulation of autophagy, DNA damage response, signal transduction by p53 class mediator, protein deubiquitination, nucleus, cytoplasm, early endosome, intermediate filament cytoskeleton, protein binding, ubiquitin thiolesterase activity, cysteine-type endopeptidase activity, p53 binding, ion channel binding, ubiquitin-specific …	TRUE	FALSE	FALSE	FALSE	FALSE	FALSE	FALSE	FALSE	FALSE	FALSE	FALSE	FALSE
ENSG00000103266	STUB1	ubiquitin-dependent protein catabolic process, protein ubiquitination, protein polyubiquitination, DNA repair, cellular response to misfolded protein, positive regulation of protein ubiquitination, transforming growth factor beta receptor signaling pathway, negative regulation of transforming growth factor beta receptor signaling pathway, positive regulation of proteasomal ubiquitin-dependent pro…	FALSE	FALSE	FALSE	FALSE	FALSE	FALSE	FALSE	FALSE	FALSE	FALSE	FALSE	FALSE
ENSG00000103363	TCEB2	protein binding, translation elongation factor activity, protein ubiquitination, viral reproduction, gene expression, transcription from RNA polymerase II promoter, cellular response to hypoxia, protein complex assembly, cellular response to stress, transcription elongation from RNA polymerase II promoter, positive regulation of viral transcription, regulation of transcription from RNA polymerase…	FALSE	FALSE	FALSE	FALSE	FALSE	FALSE	FALSE	FALSE	FALSE	FALSE	FALSE	FALSE
ENSG00000103502	CDIPT	small molecule metabolic process, phospholipid biosynthetic process, phospholipid metabolic process, phosphatidylinositol biosynthetic process, glycerophospholipid biosynthetic process, CDP-diacylglycerol metabolic process, integral to membrane, plasma membrane, endoplasmic reticulum membrane, membrane, Golgi membrane, manganese ion binding, phosphotransferase activity, for other substituted phos…	FALSE	FALSE	FALSE	FALSE	FALSE	FALSE	FALSE	FALSE	FALSE	FALSE	FALSE	FALSE
ENSG00000103510	KAT8	kinetochore, enzyme binding, acetyltransferase activity, transcription, DNA-dependent, positive regulation of transcription, DNA-dependent, negative regulation of transcription, DNA-dependent, regulation of transcription, DNA-dependent, histone acetylation, myeloid cell differentiation, histone H4-K5 acetylation, histone H4-K8 acetylation, histone H4-K16 acetylation, histone acetyltransferase com…	FALSE	FALSE	FALSE	FALSE	FALSE	FALSE	FALSE	FALSE	FALSE	FALSE	FALSE	FALSE
ENSG00000103707	MTFMT	biosynthetic process, conversion of methionyl-tRNA to N-formyl-methionyl-tRNA, mitochondrion, catalytic activity, methyltransferase activity, hydroxymethyl-, formyl- and related transferase activity, methionyl-tRNA formyltransferase activity	FALSE	FALSE	FALSE	FALSE	FALSE	FALSE	FALSE	FALSE	FALSE	FALSE	FALSE	FALSE
ENSG00000104142	VPS18	intracellular protein transport, vesicle-mediated transport, endosome organization, lysosome organization, late endosome membrane, early endosome, actin filament, lysosomal membrane, HOPS complex, protein binding, metal ion binding, actin binding, binding	FALSE	FALSE	FALSE	FALSE	FALSE	FALSE	FALSE	FALSE	FALSE	FALSE	FALSE	FALSE
ENSG00000104177	MYEF2	transcription, DNA-dependent, neuron differentiation, myotube differentiation, nucleus, Golgi apparatus, nucleotide binding, RNA binding, DNA binding, nucleic acid binding	TRUE	FALSE	FALSE	FALSE	FALSE	FALSE	FALSE	FALSE	FALSE	FALSE	FALSE	FALSE
ENSG00000104218	CSPP1	positive regulation of cell division, positive regulation of cell cycle cytokinesis, centrosome, spindle, microtubule, spindle pole, protein binding	FALSE	FALSE	FALSE	FALSE	FALSE	FALSE	FALSE	FALSE	FALSE	FALSE	FALSE	FALSE
ENSG00000104343	UBE2W	acid-amino acid ligase activity, DNA repair, cellular response to misfolded protein, proteasomal ubiquitin-dependent protein catabolic process, protein monoubiquitination, protein K11-linked ubiquitination, misfolded or incompletely synthesized protein catabolic process, nucleus, ATP binding, ubiquitin-protein ligase activity, ubiquitin protein ligase binding	FALSE	FALSE	FALSE	FALSE	FALSE	FALSE	FALSE	FALSE	FALSE	FALSE	FALSE	FALSE
ENSG00000104447	TRPS1	negative regulation of transcription from RNA polymerase II promoter, skeletal system development, negative regulation of transcription, DNA-dependent, regulation of transcription, DNA-dependent, transcription from RNA polymerase II promoter, regulation of chondrocyte differentiation, NLS-bearing substrate import into nucleus, nucleus, intracellular, sequence-specific DNA binding transcription fa…	TRUE	FALSE	FALSE	FALSE	FALSE	FALSE	FALSE	FALSE	FALSE	FALSE	FALSE	FALSE
ENSG00000104497	SNX16	cell communication, protein targeting to lysosome, endosome to lysosome transport, early endosome to late endosome transport, lysosome, late endosome membrane, early endosome, early endosome membrane, late endosome, extrinsic to endosome membrane, protein binding, phosphatidylinositol binding, identical protein binding	TRUE	FALSE	FALSE	FALSE	FALSE	FALSE	FALSE	FALSE	FALSE	FALSE	FALSE	FALSE
ENSG00000104522	TSTA3	cellular metabolic process, extracellular polysaccharide biosynthetic process, leukocyte cell-cell adhesion, cytolysis, GDP-mannose metabolic process, 'de novo' GDP-L-fucose biosynthetic process, cytoplasm, nucleotide binding, catalytic activity, electron carrier activity, isomerase activity, coenzyme binding, dTDP-4-dehydrorhamnose reductase activity, GDP-4-dehydro-D-rhamnose reductase activity,…	FALSE	FALSE	FALSE	FALSE	FALSE	FALSE	FALSE	FALSE	FALSE	FALSE	FALSE	FALSE
ENSG00000104626	ERI1	gene silencing by RNA, rRNA 3'-end processing, nucleus, cytoplasm, intracellular, nucleolus, histone pre-mRNA 3'end processing complex, nucleic acid binding, exonuclease activity, metal ion binding, rRNA binding, ribosome binding, 3'-5' exonuclease activity, histone pre-mRNA stem-loop binding	TRUE	FALSE	FALSE	FALSE	FALSE	FALSE	FALSE	FALSE	FALSE	FALSE	FALSE	FALSE
ENSG00000104643	MTMR9	dephosphorylation, regulation of catalytic activity, cytoplasm, protein binding, phosphatase activity, enzyme regulator activity	TRUE	FALSE	FALSE	FALSE	FALSE	FALSE	FALSE	FALSE	FALSE	FALSE	FALSE	FALSE
ENSG00000104687	GSR	oxidation-reduction process, spermatogenesis, small molecule metabolic process, glutathione metabolic process, cell redox homeostasis, nucleobase-containing small molecule metabolic process, nucleobase-containing small molecule interconversion, cytoplasm, cytosol, mitochondrion, protein homodimerization activity, oxidoreductase activity, electron carrier activity, NADP binding, flavin adenine din…	FALSE	FALSE	FALSE	FALSE	FALSE	FALSE	FALSE	FALSE	FALSE	FALSE	FALSE	FALSE
ENSG00000104756	KCTD9	protein homooligomerization, intracellular signal transduction, protein binding	FALSE	FALSE	FALSE	FALSE	FALSE	FALSE	FALSE	FALSE	FALSE	FALSE	FALSE	FALSE
ENSG00000104856	RELB	transcription, DNA-dependent, antigen processing and presentation, regulation of transcription, DNA-dependent, positive regulation of gene expression, myeloid dendritic cell differentiation, T-helper 1 cell differentiation, T-helper 1 type immune response, nucleus, cytosol, microtubule organizing center, DNA binding, sequence-specific DNA binding transcription factor activity, protein binding, tr…	FALSE	FALSE	FALSE	FALSE	FALSE	FALSE	FALSE	FALSE	FALSE	FALSE	FALSE	FALSE
ENSG00000104886	PLEKHJ1	protein binding, phospholipid binding	FALSE	FALSE	FALSE	FALSE	FALSE	FALSE	FALSE	FALSE	FALSE	FALSE	FALSE	FALSE
ENSG00000104915	STX10	vesicle-mediated transport, Golgi vesicle transport, membrane, intracellular protein transport, retrograde transport, endosome to Golgi, integral to membrane, Golgi membrane, protein binding, SNAP receptor activity, intracellular	FALSE	FALSE	FALSE	FALSE	FALSE	FALSE	TRUE	FALSE	FALSE	FALSE	FALSE	FALSE
ENSG00000104973	MED25	negative regulation of transcription from RNA polymerase II promoter, positive regulation of transcription from RNA polymerase II promoter, gene expression, transcription initiation from RNA polymerase II promoter, negative regulation of fibroblast proliferation, positive regulation of cell cycle arrest, positive regulation of chromatin binding, positive regulation of mediator complex assembly, n…	FALSE	FALSE	FALSE	FALSE	FALSE	FALSE	FALSE	FALSE	FALSE	FALSE	FALSE	FALSE
ENSG00000105136	ZNF419	regulation of transcription, DNA-dependent, intracellular, nucleic acid binding, , zinc ion binding, transcription, DNA-dependent, nucleus, DNA binding, cytoplasm, nucleolus	TRUE	FALSE	FALSE	FALSE	FALSE	FALSE	FALSE	FALSE	FALSE	FALSE	FALSE	FALSE
ENSG00000105254	TBCB	cell differentiation, cellular protein metabolic process, nervous system development, 'de novo' posttranslational protein folding, cytoplasm, microtubule, microtubule cytoskeleton, protein binding	TRUE	FALSE	FALSE	FALSE	FALSE	FALSE	FALSE	FALSE	FALSE	FALSE	FALSE	FALSE
ENSG00000105327	BBC3	apoptotic process, mitochondrion, induction of apoptosis, cellular response to hypoxia, positive regulation of neuron apoptotic process, release of cytochrome c from mitochondria, release of sequestered calcium ion into cytosol, determination of adult lifespan, activation of cysteine-type endopeptidase activity involved in apoptotic process, negative regulation of growth, intrinsic apoptotic sign…	TRUE	FALSE	FALSE	FALSE	FALSE	FALSE	FALSE	FALSE	FALSE	FALSE	FALSE	FALSE
ENSG00000105518	TMEM205	integral to membrane	FALSE	FALSE	FALSE	FALSE	FALSE	FALSE	FALSE	FALSE	FALSE	FALSE	FALSE	FALSE
ENSG00000105612	DNASE2	apoptotic process, DNA catabolic process, DNA metabolic process, erythrocyte differentiation, lysosome, DNA binding, deoxyribonuclease II activity, endodeoxyribonuclease activity	TRUE	FALSE	FALSE	FALSE	FALSE	FALSE	FALSE	FALSE	FALSE	FALSE	FALSE	FALSE
ENSG00000105669	COPE	protein transport, cellular membrane organization, retrograde vesicle-mediated transport, Golgi to ER, intra-Golgi vesicle-mediated transport, COPI coating of Golgi vesicle, cytosol, Golgi apparatus, COPI vesicle coat, COPI-coated vesicle, structural molecule activity	FALSE	FALSE	FALSE	FALSE	FALSE	FALSE	FALSE	FALSE	FALSE	FALSE	FALSE	FALSE
ENSG00000105875	WDR91	protein binding	FALSE	FALSE	FALSE	FALSE	FALSE	FALSE	FALSE	FALSE	FALSE	FALSE	FALSE	FALSE
ENSG00000105948	TTC26	protein binding, cilium assembly, primary cilium, cilium	TRUE	FALSE	FALSE	FALSE	FALSE	FALSE	FALSE	FALSE	FALSE	FALSE	FALSE	FALSE
ENSG00000105963	ADAP1	regulation of ARF GTPase activity, cell surface receptor signaling pathway, regulation of GTPase activity, nucleus, cytoplasm, plasma membrane, zinc ion binding, protein binding, phospholipid binding, ARF GTPase activator activity, inositol 1,3,4,5 tetrakisphosphate binding	TRUE	FALSE	FALSE	FALSE	FALSE	FALSE	FALSE	FALSE	FALSE	FALSE	FALSE	FALSE
ENSG00000106003	LFNG	membrane, transferase activity, transferring glycosyl groups, female meiosis, Notch signaling pathway, positive regulation of protein binding, positive regulation of Notch signaling pathway, ovarian follicle development, organ morphogenesis, compartment pattern specification, extracellular region, integral to Golgi membrane, molecular_function, metal ion binding, O-fucosylpeptide 3-beta-N-acetylg…	TRUE	FALSE	FALSE	FALSE	FALSE	FALSE	FALSE	FALSE	FALSE	FALSE	FALSE	FALSE
ENSG00000106009	BRAT1	response to ionizing radiation, nucleus, protein binding, binding	TRUE	FALSE	FALSE	FALSE	FALSE	FALSE	FALSE	FALSE	FALSE	FALSE	FALSE	FALSE
ENSG00000106070	GRB10	signal transduction, negative regulation of Wnt receptor signaling pathway, response to insulin stimulus, insulin receptor signaling pathway, negative regulation of glucose import, negative regulation of insulin receptor signaling pathway, insulin-like growth factor receptor signaling pathway, positive regulation of vascular endothelial growth factor receptor signaling pathway, positive regulatio…	FALSE	FALSE	FALSE	FALSE	FALSE	FALSE	FALSE	FALSE	FALSE	FALSE	FALSE	FALSE
ENSG00000106144	CASP2	proteolysis, apoptotic process, regulation of apoptotic process, brain development, induction of apoptosis, DNA damage response, signal transduction by p53 class mediator resulting in cell cycle arrest, positive regulation of apoptotic process, aging, positive regulation of neuron apoptotic process, protein processing, cellular response to mechanical stimulus, neural retina development, nerve gro…	TRUE	FALSE	FALSE	FALSE	FALSE	FALSE	FALSE	FALSE	FALSE	FALSE	FALSE	FALSE
ENSG00000106153	CHCHD2	mitochondrion	TRUE	FALSE	FALSE	FALSE	FALSE	FALSE	FALSE	FALSE	FALSE	FALSE	FALSE	FALSE
ENSG00000106246	PTCD1	tRNA 3'-end processing, mitochondrion, mitochondrial matrix, tRNA binding	TRUE	FALSE	FALSE	FALSE	FALSE	FALSE	FALSE	FALSE	FALSE	FALSE	FALSE	FALSE
ENSG00000106392	C1GALT1	angiogenesis, cell differentiation, O-glycan processing, protein glycosylation, cellular protein metabolic process, kidney development, post-translational protein modification, integral to membrane, membrane, Golgi membrane, metal ion binding, transferase activity, transferring glycosyl groups, galactosyltransferase activity, glycoprotein-N-acetylgalactosamine 3-beta-galactosyltransferase activity	TRUE	FALSE	FALSE	FALSE	FALSE	FALSE	FALSE	FALSE	FALSE	FALSE	FALSE	FALSE
ENSG00000106460	TMEM106B	biological_process, integral to membrane, cellular_component, late endosome membrane, lysosomal membrane, molecular_function	TRUE	FALSE	FALSE	FALSE	FALSE	FALSE	FALSE	FALSE	FALSE	FALSE	FALSE	FALSE
ENSG00000106603	COA1	integral to membrane, mitochondrial membrane	TRUE	FALSE	FALSE	FALSE	FALSE	FALSE	FALSE	FALSE	FALSE	FALSE	FALSE	FALSE
ENSG00000107242	PIP5K1B	small molecule metabolic process, phospholipid metabolic process, phosphatidylinositol metabolic process, phosphatidylinositol biosynthetic process, phosphorylation, cytosol, membrane, endomembrane system, uropod, protein binding, ATP binding, phosphatidylinositol phosphate kinase activity, 1-phosphatidylinositol-4-phosphate 5-kinase activity	TRUE	FALSE	FALSE	FALSE	FALSE	FALSE	FALSE	FALSE	FALSE	FALSE	FALSE	FALSE
ENSG00000107554	DNMBP	regulation of Rho protein signal transduction, intracellular signal transduction, cytoplasm, intracellular, protein binding, Rho guanyl-nucleotide exchange factor activity, cell junction, cytoskeleton, synapse, Golgi stack	TRUE	FALSE	FALSE	FALSE	FALSE	FALSE	FALSE	FALSE	FALSE	FALSE	FALSE	FALSE
ENSG00000107560	RAB11FIP2	transmembrane transport, protein transport, establishment of cell polarity, water transport, nucleus, plasma membrane, intracellular membrane-bounded organelle, cytoplasmic vesicle membrane, recycling endosome membrane, endosome, protein homodimerization activity, protein binding, protein kinase binding	FALSE	FALSE	FALSE	FALSE	FALSE	FALSE	FALSE	FALSE	FALSE	FALSE	FALSE	FALSE
ENSG00000107819	SFXN3	transmembrane transport, iron ion homeostasis, cation transport, integral to membrane, mitochondrion, membrane, mitochondrial membrane, cation transmembrane transporter activity	TRUE	FALSE	FALSE	FALSE	FALSE	FALSE	FALSE	FALSE	FALSE	FALSE	FALSE	FALSE
ENSG00000108021	FAM208B		TRUE	FALSE	FALSE	FALSE	FALSE	FALSE	FALSE	FALSE	FALSE	FALSE	FALSE	FALSE
ENSG00000108064	TFAM	positive regulation of transcription, DNA-dependent, gene expression, transcription from mitochondrial promoter, DNA-dependent DNA replication, transcription initiation from mitochondrial promoter, regulation of transcription from RNA polymerase I promoter, mitochondrial respiratory chain complex assembly, mitochondrion, mitochondrial matrix, mitochondrial nucleoid, sequence-specific DNA binding …	TRUE	FALSE	FALSE	FALSE	FALSE	FALSE	FALSE	FALSE	FALSE	FALSE	FALSE	FALSE
ENSG00000108106	UBE2S	cell division, cellular protein modification process, anaphase-promoting complex-dependent proteasomal ubiquitin-dependent protein catabolic process, protein K11-linked ubiquitination, protein K63-linked ubiquitination, protein K6-linked ubiquitination, exit from mitosis, free ubiquitin chain polymerization, activation of anaphase-promoting complex activity, protein K29-linked ubiquitination, pro…	FALSE	FALSE	FALSE	FALSE	FALSE	FALSE	FALSE	FALSE	FALSE	FALSE	FALSE	FALSE
ENSG00000108298	RPL19	translation, viral reproduction, gene expression, RNA metabolic process, mRNA metabolic process, translational elongation, cellular protein metabolic process, SRP-dependent cotranslational protein targeting to membrane, translational initiation, viral infectious cycle, nuclear-transcribed mRNA catabolic process, nonsense-mediated decay, translational termination, viral transcription, cytosol, int…	FALSE	FALSE	FALSE	FALSE	FALSE	FALSE	FALSE	FALSE	FALSE	FALSE	FALSE	FALSE
ENSG00000108375	RNF43	protein ubiquitination, Wnt receptor signaling pathway, negative regulation of Wnt receptor signaling pathway, protein ubiquitination involved in ubiquitin-dependent protein catabolic process, stem cell proliferation, Wnt receptor catabolic process, endoplasmic reticulum membrane, nuclear envelope, integral to plasma membrane, zinc ion binding, protein binding, ubiquitin-protein ligase activity, …	FALSE	FALSE	FALSE	FALSE	FALSE	FALSE	FALSE	FALSE	FALSE	FALSE	FALSE	FALSE
ENSG00000108387	38231	cell cycle, apoptotic process, regulation of apoptotic process, brain development, positive regulation of apoptotic process, positive regulation of protein ubiquitination, sperm capacitation, cytokinesis, GTP catabolic process, positive regulation of intrinsic apoptotic signaling pathway, sperm mitochondrion organization, nucleus, mitochondrion, cytoskeleton, septin complex, microtubule-based fla…	FALSE	FALSE	TRUE	FALSE	FALSE	FALSE	FALSE	FALSE	FALSE	FALSE	FALSE	FALSE
ENSG00000108395	TRIM37	aggresome assembly, negative regulation of NF-kappaB transcription factor activity, protein autoubiquitination, intracellular, perinuclear region of cytoplasm, peroxisome, aggresome, cytosolic part, protein homodimerization activity, zinc ion binding, protein binding, ubiquitin-protein ligase activity, ubiquitin protein ligase binding, tumor necrosis factor receptor binding	TRUE	FALSE	FALSE	FALSE	FALSE	FALSE	FALSE	FALSE	FALSE	FALSE	FALSE	FALSE
ENSG00000108468	CBX1	negative regulation of transcription, DNA-dependent, nucleus, chromosome, centromeric region, spindle, nucleoplasm, chromatin, centromeric heterochromatin, chromocenter, nuclear heterochromatin, female pronucleus, male pronucleus, protein binding, enzyme binding, chromatin binding, identical protein binding	TRUE	FALSE	FALSE	FALSE	FALSE	FALSE	FALSE	FALSE	FALSE	FALSE	FALSE	FALSE
ENSG00000108556	CHRNE	ion transport, signal transduction, transport, synaptic transmission, regulation of membrane potential, cation transport, muscle contraction, synaptic transmission, cholinergic, plasma membrane, membrane, cell junction, postsynaptic membrane, integral to plasma membrane, acetylcholine-gated channel complex, extracellular ligand-gated ion channel activity, cation transmembrane transporter activity…	TRUE	FALSE	FALSE	FALSE	FALSE	FALSE	FALSE	FALSE	FALSE	FALSE	FALSE	FALSE
ENSG00000108559	NUP88	transmembrane transport, small molecule metabolic process, protein transport, viral reproduction, carbohydrate metabolic process, mRNA transport, cytokine-mediated signaling pathway, regulation of glucose transport, glucose transport, hexose transport, nucleus, cytosol, nuclear pore, transporter activity	TRUE	FALSE	FALSE	FALSE	FALSE	FALSE	FALSE	FALSE	FALSE	FALSE	FALSE	FALSE
ENSG00000108641	B9D1	cilium assembly, cilium morphogenesis, smoothened signaling pathway, centrosome, ciliary transition zone, cilium axoneme, microtubule basal body, TCTN-B9D complex, hedgehog receptor activity, protein binding	FALSE	FALSE	FALSE	FALSE	FALSE	FALSE	FALSE	FALSE	FALSE	FALSE	FALSE	FALSE
ENSG00000108771	DHX58	innate immune response, response to virus, defense response to virus, positive regulation of type I interferon production, negative regulation of type I interferon production, negative regulation of RIG-I signaling pathway, negative regulation of innate immune response, positive regulation of MDA-5 signaling pathway, positive regulation of RIG-I signaling pathway, regulation of innate immune resp…	TRUE	FALSE	FALSE	FALSE	FALSE	FALSE	FALSE	FALSE	FALSE	FALSE	FALSE	FALSE
ENSG00000108788	MLX	transcription, DNA-dependent, small molecule metabolic process, negative regulation of transcription, DNA-dependent, regulation of transcription, DNA-dependent, nucleocytoplasmic transport, energy reserve metabolic process, positive regulation of cellular metabolic process, nucleus, cytoplasm, DNA binding, sequence-specific DNA binding transcription factor activity, protein homodimerization activ…	FALSE	FALSE	FALSE	FALSE	FALSE	FALSE	FALSE	FALSE	FALSE	FALSE	FALSE	FALSE
ENSG00000108861	DUSP3	innate immune response, negative regulation of T cell receptor signaling pathway, Toll signaling pathway, in utero embryonic development, protein dephosphorylation, peptidyl-tyrosine dephosphorylation, toll-like receptor signaling pathway, dephosphorylation, negative regulation of JNK cascade, negative regulation of ERK1 and ERK2 cascade, positive regulation of mitotic cell cycle, inactivation of…	TRUE	FALSE	FALSE	FALSE	FALSE	FALSE	FALSE	FALSE	FALSE	FALSE	FALSE	FALSE
ENSG00000108984	MAP2K6	transcription, DNA-dependent, innate immune response, apoptotic process, regulation of transcription, DNA-dependent, signal transduction, Toll signaling pathway, protein phosphorylation, activation of MAPK activity, cell cycle arrest, toll-like receptor signaling pathway, muscle cell differentiation, stress-activated MAPK cascade, DNA damage induced protein phosphorylation, toll-like receptor 4 s…	FALSE	FALSE	FALSE	FALSE	FALSE	FALSE	FALSE	FALSE	FALSE	FALSE	FALSE	FALSE
ENSG00000109016	DHRS7B	metabolic process, nucleotide binding, oxidoreductase activity, biological_process, integral to membrane, cellular_component, peroxisomal membrane, molecular_function	TRUE	FALSE	FALSE	FALSE	FALSE	FALSE	FALSE	FALSE	FALSE	FALSE	FALSE	FALSE
ENSG00000109220	CHIC2	biological_process, cellular_component, plasma membrane, Golgi-associated vesicle, Golgi apparatus, molecular_function, protein binding	FALSE	FALSE	FALSE	FALSE	FALSE	FALSE	FALSE	FALSE	FALSE	FALSE	FALSE	FALSE
ENSG00000109519	GRPEL1	protein folding, cellular protein metabolic process, protein targeting to mitochondrion, protein import into mitochondrial matrix, mitochondrion, mitochondrial matrix, protein homodimerization activity, chaperone binding, unfolded protein binding, adenyl-nucleotide exchange factor activity	TRUE	FALSE	FALSE	FALSE	FALSE	FALSE	FALSE	FALSE	FALSE	FALSE	FALSE	FALSE
ENSG00000109586	GALNT7	O-glycan processing, carbohydrate metabolic process, cellular protein metabolic process, protein O-linked glycosylation, post-translational protein modification, integral to membrane, Golgi membrane, carbohydrate binding, polypeptide N-acetylgalactosaminyltransferase activity, transferase activity, transferring glycosyl groups	FALSE	FALSE	FALSE	FALSE	FALSE	FALSE	FALSE	FALSE	FALSE	FALSE	FALSE	FALSE
ENSG00000109689	STIM2	positive regulation of calcium ion transport, cellular calcium ion homeostasis, activation of store-operated calcium channel activity, integral to membrane, plasma membrane, endoplasmic reticulum membrane, endoplasmic reticulum, protein binding, calcium ion binding, calcium channel regulator activity, store-operated calcium channel activity	TRUE	FALSE	FALSE	FALSE	FALSE	FALSE	FALSE	FALSE	FALSE	FALSE	FALSE	FALSE
ENSG00000109736	MFSD10	transmembrane transport, integral to membrane, transmembrane transporter activity, apoptotic process, transport, tetracycline transport, tetracycline transporter activity	FALSE	FALSE	FALSE	FALSE	FALSE	FALSE	FALSE	FALSE	FALSE	FALSE	FALSE	FALSE
ENSG00000109790	KLHL5	protein binding, biological_process, cytoplasm, cytoskeleton, molecular_function, actin binding	TRUE	FALSE	FALSE	FALSE	FALSE	FALSE	FALSE	FALSE	FALSE	FALSE	FALSE	FALSE
ENSG00000109861	CTSC	proteolysis, immune response, aging, response to organic substance, T cell mediated cytotoxicity, endoplasmic reticulum, Golgi apparatus, lysosome, serine-type endopeptidase activity, cysteine-type peptidase activity, identical protein binding, protein self-association, chloride ion binding	TRUE	FALSE	FALSE	FALSE	FALSE	FALSE	FALSE	FALSE	FALSE	FALSE	FALSE	FALSE
ENSG00000110002	VWA5A	nucleus, protein binding	TRUE	FALSE	FALSE	FALSE	FALSE	FALSE	FALSE	FALSE	FALSE	FALSE	FALSE	FALSE
ENSG00000110042	DTX4	protein ubiquitination, Notch signaling pathway, cytoplasm, zinc ion binding, protein binding, ligase activity	FALSE	FALSE	FALSE	FALSE	FALSE	FALSE	FALSE	FALSE	FALSE	FALSE	FALSE	FALSE
ENSG00000110057	UNC93B1	innate immune response, intracellular protein transport, defense response to virus, toll-like receptor 3 signaling pathway, toll-like receptor 9 signaling pathway, toll-like receptor 7 signaling pathway, integral to membrane, endoplasmic reticulum membrane, Golgi membrane, endoplasmic reticulum, lysosome, endosome, early phagosome	FALSE	FALSE	FALSE	FALSE	FALSE	FALSE	FALSE	FALSE	FALSE	FALSE	FALSE	FALSE
ENSG00000110075	PPP6R3	regulation of phosphoprotein phosphatase activity, nucleus, cytoplasm, protein binding, protein phosphatase binding, binding	FALSE	FALSE	FALSE	FALSE	FALSE	FALSE	FALSE	FALSE	FALSE	FALSE	FALSE	FALSE
ENSG00000110324	IL10RA	signal transduction, integral to membrane, plasma membrane, protein binding, signal transducer activity, receptor activity, interleukin-10 receptor activity	FALSE	FALSE	FALSE	FALSE	FALSE	FALSE	FALSE	FALSE	FALSE	FALSE	FALSE	FALSE
ENSG00000110717	NDUFS8	oxidation-reduction process, small molecule metabolic process, response to oxidative stress, respiratory electron transport chain, mitochondrial electron transport, NADH to ubiquinone, mitochondrial respiratory chain complex I assembly, mitochondrion, membrane, mitochondrial inner membrane, mitochondrial respiratory chain complex I, oxidoreductase activity, metal ion binding, 4 iron, 4 sulfur clu…	TRUE	FALSE	FALSE	FALSE	FALSE	FALSE	FALSE	FALSE	FALSE	FALSE	FALSE	FALSE
ENSG00000110851	PRDM4	cell proliferation, negative regulation of cell growth, regulation of transcription, DNA-dependent, signal transduction, cellular response to growth factor stimulus, transcription from RNA polymerase II promoter, cellular response to nutrient, nerve growth factor receptor signaling pathway, negative regulation of cell cycle, cytosol, intracellular, nucleoplasm, DNA binding, zinc ion binding, prot…	TRUE	FALSE	FALSE	FALSE	FALSE	FALSE	FALSE	FALSE	FALSE	FALSE	FALSE	FALSE
ENSG00000110955	ATP5B	small molecule metabolic process, lipid metabolic process, angiogenesis, ATP biosynthetic process, ATP hydrolysis coupled proton transport, ADP biosynthetic process, ATP synthesis coupled proton transport, respiratory electron transport chain, regulation of intracellular pH, proton transport, ATP metabolic process, generation of precursor metabolites and energy, negative regulation of cell adhesi…	FALSE	FALSE	FALSE	FALSE	FALSE	FALSE	FALSE	FALSE	FALSE	FALSE	FALSE	FALSE
ENSG00000111145	ELK3	transcription, DNA-dependent, negative regulation of transcription, DNA-dependent, regulation of transcription, DNA-dependent, angiogenesis, signal transduction, wound healing, nucleus, mitochondrion, intracellular membrane-bounded organelle, sequence-specific DNA binding transcription factor activity, protein binding, transcription corepressor activity, sequence-specific DNA binding, purine-rich…	TRUE	FALSE	FALSE	FALSE	FALSE	FALSE	FALSE	FALSE	FALSE	FALSE	FALSE	FALSE
ENSG00000111331	OAS3	response to virus, immune response, negative regulation of viral genome replication, defense response to virus, cytokine-mediated signaling pathway, nucleobase-containing compound metabolic process, interferon-gamma-mediated signaling pathway, type I interferon-mediated signaling pathway, regulation of ribonuclease activity, nucleus, cytoplasm, cytosol, intracellular membrane-bounded organelle, R…	FALSE	FALSE	FALSE	FALSE	FALSE	FALSE	FALSE	FALSE	FALSE	FALSE	FALSE	FALSE
ENSG00000111335	OAS2	response to virus, immune response, protein glycosylation, defense response to virus, cytokine-mediated signaling pathway, nucleobase-containing compound metabolic process, purine nucleotide biosynthetic process, interferon-gamma-mediated signaling pathway, RNA catabolic process, type I interferon-mediated signaling pathway, protein myristoylation, nucleus, cytoplasm, cytosol, mitochondrion, memb…	FALSE	FALSE	FALSE	FALSE	FALSE	FALSE	FALSE	FALSE	FALSE	FALSE	FALSE	FALSE
ENSG00000111596	CNOT2	regulation of transcription, DNA-dependent, gene expression, RNA metabolic process, mRNA metabolic process, nuclear-transcribed mRNA poly(A) tail shortening, nuclear-transcribed mRNA catabolic process, deadenylation-dependent decay, regulation of transcription from RNA polymerase II promoter, nucleus, cytosol, RNA polymerase II transcription cofactor activity	TRUE	FALSE	FALSE	FALSE	FALSE	FALSE	FALSE	FALSE	FALSE	FALSE	FALSE	FALSE
ENSG00000111684	LPCAT3	integral to membrane, small molecule metabolic process, phospholipid metabolic process, glycerophospholipid biosynthetic process, phosphatidylserine acyl-chain remodeling, phosphatidylcholine acyl-chain remodeling, phosphatidylethanolamine acyl-chain remodeling, endoplasmic reticulum membrane, 1-acylglycerophosphocholine O-acyltransferase activity, , transferase activity, transferring acyl groups	FALSE	FALSE	FALSE	FALSE	FALSE	FALSE	FALSE	FALSE	FALSE	FALSE	FALSE	FALSE
ENSG00000111731	KIAA0528	protein localization to plasma membrane, positive regulation of glucose import in response to insulin stimulus, vesicle fusion, plasma membrane, protein binding, calcium ion binding	TRUE	FALSE	FALSE	FALSE	FALSE	FALSE	FALSE	FALSE	FALSE	FALSE	FALSE	FALSE
ENSG00000111817	DSE	small molecule metabolic process, carbohydrate metabolic process, glycosaminoglycan metabolic process, chondroitin sulfate metabolic process, heparan sulfate proteoglycan biosynthetic process, dermatan sulfate biosynthetic process, integral to membrane, Golgi membrane, endoplasmic reticulum, Golgi apparatus, chondroitin-glucuronate 5-epimerase activity	TRUE	FALSE	FALSE	FALSE	FALSE	FALSE	FALSE	FALSE	FALSE	FALSE	FALSE	FALSE
ENSG00000111846	GCNT2	transferase activity, protein glycosylation, integral to membrane, membrane, Golgi membrane, acetylglucosaminyltransferase activity, N-acetyllactosaminide beta-1,6-N-acetylglucosaminyltransferase activity, multicellular organismal development, glycosaminoglycan biosynthetic process	TRUE	FALSE	FALSE	FALSE	FALSE	FALSE	FALSE	FALSE	FALSE	FALSE	FALSE	FALSE
ENSG00000112078	KCTD20	protein homooligomerization, ion channel activity, protein binding	TRUE	FALSE	FALSE	FALSE	FALSE	FALSE	FALSE	FALSE	FALSE	FALSE	FALSE	FALSE
ENSG00000112137	PHACTR1	cytoplasm, cell junction, synapse, actin binding, protein phosphatase inhibitor activity	TRUE	FALSE	FALSE	FALSE	FALSE	FALSE	FALSE	FALSE	FALSE	FALSE	FALSE	FALSE
ENSG00000112304	ACOT13	protein homotetramerization, mitochondrion, acyl-CoA hydrolase activity	FALSE	FALSE	FALSE	FALSE	FALSE	FALSE	FALSE	FALSE	FALSE	FALSE	FALSE	FALSE
ENSG00000112357	PEX7	protein binding, neuron migration, peroxisome organization, fatty acid beta-oxidation, endochondral ossification, protein import into peroxisome matrix, ether lipid biosynthetic process, protein targeting to peroxisome, cytosol, peroxisome, peroxisomal matrix, protein homodimerization activity, enzyme binding, peroxisome matrix targeting signal-2 binding	TRUE	FALSE	FALSE	FALSE	FALSE	FALSE	FALSE	FALSE	FALSE	FALSE	FALSE	FALSE
ENSG00000112367	FIG4	small molecule metabolic process, locomotory behavior, phospholipid metabolic process, neuron development, positive regulation of neuron projection development, cell death, pigmentation, phosphatidylinositol metabolic process, phosphatidylinositol biosynthetic process, phosphatidylinositol-3-phosphate biosynthetic process, vacuole organization, myelin assembly, negative regulation of myelination,…	TRUE	FALSE	FALSE	FALSE	FALSE	FALSE	FALSE	FALSE	FALSE	FALSE	FALSE	FALSE
ENSG00000112576	CCND3	cell division, signal transduction, regulation of cell cycle, regulation of cyclin-dependent protein kinase activity, positive regulation of protein phosphorylation, T cell proliferation, positive regulation of cyclin-dependent protein kinase activity, nucleus, cytoplasm, membrane, cyclin-dependent protein kinase holoenzyme complex, protein binding, protein kinase binding, cyclin-dependent protei…	FALSE	FALSE	FALSE	FALSE	FALSE	FALSE	FALSE	FALSE	FALSE	FALSE	FALSE	FALSE
ENSG00000112739	PRPF4B	RNA splicing, protein phosphorylation, mRNA splicing, via spliceosome, nucleus, chromosome, catalytic step 2 spliceosome, protein binding, ATP binding, protein serine/threonine kinase activity, protein kinase activity, protein tyrosine kinase activity, transferase activity, transferring phosphorus-containing groups	TRUE	FALSE	FALSE	FALSE	FALSE	FALSE	TRUE	FALSE	FALSE	FALSE	FALSE	FALSE
ENSG00000112759	SLC29A1	transmembrane transport, transport, regulation of excitatory postsynaptic membrane potential, sleep, cellular response to hypoxia, lactation, cellular response to glucose stimulus, nucleobase-containing compound metabolic process, nucleoside transport, uridine transport, integral to membrane, plasma membrane, membrane, basolateral plasma membrane, integral to plasma membrane, apical plasma membra…	FALSE	FALSE	FALSE	FALSE	FALSE	FALSE	FALSE	FALSE	FALSE	FALSE	FALSE	FALSE
ENSG00000113013	HSPA9	negative regulation of apoptotic process, cell morphogenesis, protein folding, protein export from nucleus, carbohydrate metabolic process, cellular protein metabolic process, protein targeting to mitochondrion, cytoplasm, mitochondrion, cell surface, nucleolus, mitochondrial nucleoid, protein binding, ATP binding, unfolded protein binding, phosphotransferase activity, alcohol group as acceptor, …	FALSE	FALSE	FALSE	FALSE	FALSE	FALSE	FALSE	FALSE	FALSE	FALSE	FALSE	FALSE
ENSG00000113048	MRPS27	mitochondrion, ribosome, protein binding	FALSE	FALSE	FALSE	FALSE	FALSE	FALSE	FALSE	FALSE	FALSE	FALSE	FALSE	FALSE
ENSG00000113141	IK	nucleus, immune response, cell-cell signaling, extracellular space, protein binding	TRUE	FALSE	FALSE	FALSE	FALSE	FALSE	FALSE	FALSE	FALSE	FALSE	FALSE	FALSE
ENSG00000113240	CLK4	peptidyl-tyrosine phosphorylation, protein phosphorylation, regulation of RNA splicing, protein autophosphorylation, nucleus, ATP binding, protein serine/threonine kinase activity, protein kinase activity, protein tyrosine kinase activity, transferase activity, transferring phosphorus-containing groups, protein serine/threonine/tyrosine kinase activity	TRUE	FALSE	FALSE	FALSE	FALSE	FALSE	FALSE	FALSE	FALSE	FALSE	FALSE	FALSE
ENSG00000113282	CLINT1	cellular membrane organization, endocytosis, post-Golgi vesicle-mediated transport, cytosol, membrane, perinuclear region of cytoplasm, Golgi apparatus, clathrin-coated vesicle, protein binding, phospholipid binding, lipid binding, clathrin binding	TRUE	FALSE	FALSE	FALSE	FALSE	FALSE	FALSE	FALSE	FALSE	FALSE	FALSE	FALSE
ENSG00000113356	POLR3G	innate immune response, positive regulation of interferon-beta production, gene expression, transcription from RNA polymerase III promoter, defense response to virus, positive regulation of innate immune response, transcription elongation from RNA polymerase III promoter, termination of RNA polymerase III transcription, regulation of transcription from RNA polymerase III promoter, nucleoplasm, DN…	FALSE	FALSE	FALSE	FALSE	FALSE	FALSE	FALSE	FALSE	FALSE	FALSE	FALSE	FALSE
ENSG00000113368	LMNB1	apoptotic process, cellular component disassembly involved in execution phase of apoptosis, nuclear envelope, nucleoplasm, nuclear inner membrane, nuclear matrix, lamin filament, nucleus, structural molecule activity, phospholipase binding	TRUE	FALSE	FALSE	FALSE	FALSE	FALSE	FALSE	FALSE	FALSE	FALSE	FALSE	FALSE
ENSG00000113391	FAM172A	extracellular region, endoplasmic reticulum	FALSE	FALSE	FALSE	FALSE	FALSE	FALSE	FALSE	FALSE	FALSE	FALSE	FALSE	FALSE
ENSG00000113441	LNPEP	proteolysis, protein polyubiquitination, protein catabolic process, antigen processing and presentation of peptide antigen via MHC class I, antigen processing and presentation of exogenous peptide antigen via MHC class I, female pregnancy, cell-cell signaling, antigen processing and presentation of exogenous peptide antigen via MHC class I, TAP-independent, plasma membrane, extracellular region, …	TRUE	FALSE	FALSE	FALSE	FALSE	FALSE	FALSE	FALSE	FALSE	FALSE	FALSE	FALSE
ENSG00000114127	XRN1	gene expression, RNA metabolic process, mRNA metabolic process, nuclear-transcribed mRNA catabolic process, deadenylation-dependent decay, nucleobase-containing compound metabolic process, rRNA catabolic process, exonucleolytic nuclear-transcribed mRNA catabolic process involved in deadenylation-dependent decay, histone mRNA catabolic process, nuclear-transcribed mRNA catabolic process, nuclear m…	FALSE	FALSE	FALSE	FALSE	FALSE	FALSE	FALSE	FALSE	FALSE	FALSE	FALSE	FALSE
ENSG00000114354	TFG	protein binding, identical protein binding, positive regulation of I-kappaB kinase/NF-kappaB cascade, signal transduction, cytoplasm, signal transducer activity	TRUE	FALSE	FALSE	FALSE	FALSE	FALSE	FALSE	FALSE	FALSE	FALSE	FALSE	FALSE
ENSG00000114388	NPRL2	protein phosphorylation, negative regulation of kinase activity, cytoplasm, protein binding, protein kinase activity	FALSE	FALSE	FALSE	FALSE	FALSE	FALSE	FALSE	FALSE	FALSE	FALSE	FALSE	FALSE
ENSG00000114395	CYB561D2	electron transport chain, integral to membrane, metal ion binding	FALSE	FALSE	FALSE	FALSE	FALSE	FALSE	FALSE	FALSE	FALSE	FALSE	FALSE	FALSE
ENSG00000114439	BBX	transcription, DNA-dependent, regulation of transcription, DNA-dependent, nucleus, DNA binding, protein binding	TRUE	FALSE	FALSE	FALSE	FALSE	FALSE	FALSE	FALSE	FALSE	FALSE	FALSE	FALSE
ENSG00000114480	GBE1	small molecule metabolic process, carbohydrate metabolic process, glycogen metabolic process, glucose metabolic process, glycogen biosynthetic process, generation of precursor metabolites and energy, cytosol, catalytic activity, hydrolase activity, hydrolyzing O-glycosyl compounds, cation binding, 1,4-alpha-glucan branching enzyme activity	TRUE	FALSE	FALSE	FALSE	FALSE	FALSE	FALSE	FALSE	FALSE	FALSE	FALSE	FALSE
ENSG00000114770	ABCC5	transmembrane transport, small molecule metabolic process, response to lipopolysaccharide, transport, carbohydrate metabolic process, response to insulin stimulus, glycosaminoglycan metabolic process, organic anion transport, hyaluronan metabolic process, hyaluronan biosynthetic process, integral to membrane, plasma membrane, membrane, perinuclear region of cytoplasm, integral to plasma membrane,…	TRUE	FALSE	FALSE	FALSE	FALSE	FALSE	FALSE	FALSE	FALSE	FALSE	FALSE	FALSE
ENSG00000114859	CLCN2	transmembrane transport, transport, lung development, retina development in camera-type eye, chloride transport, cell differentiation involved in salivary gland development, membrane, chloride channel complex, perikaryon, dendrite, ion channel activity, protein binding, voltage-gated chloride channel activity, , integral to membrane	FALSE	FALSE	FALSE	FALSE	FALSE	FALSE	FALSE	FALSE	FALSE	FALSE	FALSE	FALSE
ENSG00000114982	KANSL3	histone H4-K5 acetylation, histone H4-K8 acetylation, histone H4-K16 acetylation, histone acetyltransferase complex, histone acetyltransferase activity (H4-K5 specific), histone acetyltransferase activity (H4-K8 specific), histone acetyltransferase activity (H4-K16 specific)	FALSE	FALSE	FALSE	FALSE	FALSE	FALSE	FALSE	FALSE	FALSE	FALSE	FALSE	FALSE
ENSG00000115053	NCL	angiogenesis, nucleus, nucleolus, cell cortex, nucleoplasm, ribonucleoprotein complex, nucleotide binding, RNA binding, protein binding, nucleic acid binding, protein C-terminus binding, telomeric DNA binding, binding	FALSE	FALSE	FALSE	FALSE	FALSE	FALSE	FALSE	FALSE	FALSE	FALSE	FALSE	FALSE
ENSG00000115073	ACTR1B	antigen processing and presentation of exogenous peptide antigen via MHC class II, cytoplasm, cytosol, centrosome, dynactin complex, protein binding, ATP binding	FALSE	FALSE	FALSE	FALSE	FALSE	FALSE	FALSE	FALSE	FALSE	FALSE	FALSE	FALSE
ENSG00000115159	GPD2	oxidation-reduction process, glycerol-3-phosphate metabolic process, gluconeogenesis, NADH metabolic process, mitochondrial inner membrane, glycerol-3-phosphate dehydrogenase complex, oxidoreductase activity, glycerol-3-phosphate dehydrogenase [NAD+] activity, glycerol-3-phosphate dehydrogenase activity, cellular lipid metabolic process, small molecule metabolic process, glycerol catabolic proces…	TRUE	FALSE	FALSE	FALSE	FALSE	FALSE	FALSE	FALSE	FALSE	FALSE	FALSE	FALSE
ENSG00000115232	ITGA4	regulation of immune response, heart development, blood vessel remodeling, integrin-mediated signaling pathway, B cell differentiation, cell migration, leukocyte migration, blood coagulation, face development, chorio-allantoic fusion, heterophilic cell-cell adhesion, leukocyte cell-cell adhesion, cell adhesion, plasma membrane, cell surface, external side of plasma membrane, integrin complex, pro…	TRUE	FALSE	FALSE	FALSE	FALSE	FALSE	FALSE	FALSE	FALSE	FALSE	FALSE	FALSE
ENSG00000115267	IFIH1	innate immune response, regulation of apoptotic process, response to virus, positive regulation of interferon-beta production, positive regulation of interferon-alpha production, negative regulation of type I interferon production, protein sumoylation, virus-host interaction, detection of virus, regulation of type III interferon production, cytoplasmic pattern recognition receptor signaling pathw…	FALSE	FALSE	FALSE	FALSE	FALSE	FALSE	FALSE	FALSE	FALSE	FALSE	FALSE	FALSE
ENSG00000115306	SPTBN1	axon guidance, cytokinesis after mitosis, protein targeting to plasma membrane, plasma membrane organization, common-partner SMAD protein phosphorylation, SMAD protein import into nucleus, Golgi to plasma membrane protein transport, actin filament capping, membrane assembly, nucleus, cytoplasm, plasma membrane, cytosol, nucleolus, cuticular plate, M band, spectrin, spectrin-associated cytoskeleto…	TRUE	FALSE	FALSE	FALSE	FALSE	FALSE	FALSE	FALSE	FALSE	FALSE	FALSE	FALSE
ENSG00000115317	HTRA2	proteolysis, adult walking behavior, cellular response to growth factor stimulus, positive regulation of apoptotic process, cell cycle arrest, response to stress, mitochondrion organization, positive regulation of cell death, neuron development, forebrain development, regulation of multicellular organism growth, positive regulation of cysteine-type endopeptidase activity involved in apoptotic pro…	TRUE	FALSE	FALSE	FALSE	FALSE	FALSE	FALSE	FALSE	FALSE	FALSE	FALSE	FALSE
ENSG00000115419	GLS	small molecule metabolic process, cellular nitrogen compound metabolic process, glutamate biosynthetic process, neurotransmitter secretion, glutamine metabolic process, synaptic transmission, protein homotetramerization, regulation of respiratory gaseous exchange by neurological system process, glutamine catabolic process, behavior, glutamate secretion, cellular amino acid biosynthetic process, c…	FALSE	FALSE	FALSE	FALSE	FALSE	FALSE	FALSE	FALSE	FALSE	FALSE	FALSE	FALSE
ENSG00000115649	CNPPD1	regulation of cyclin-dependent protein kinase activity, integral to membrane, protein kinase binding	TRUE	FALSE	FALSE	FALSE	FALSE	FALSE	FALSE	FALSE	FALSE	FALSE	FALSE	FALSE
ENSG00000115661	STK16	positive regulation of transcription from RNA polymerase II promoter, protein phosphorylation, protein autophosphorylation, cellular response to transforming growth factor beta stimulus, membrane, perinuclear region of cytoplasm, Golgi-associated vesicle, DNA binding, protein binding, ATP binding, protein serine/threonine kinase activity, protein kinase activity, protein tyrosine kinase activity,…	FALSE	FALSE	FALSE	FALSE	FALSE	FALSE	FALSE	FALSE	FALSE	FALSE	FALSE	FALSE
ENSG00000115808	STRN	negative regulation of cell proliferation, Wnt receptor signaling pathway, locomotory behavior, dendrite development, tight junction assembly, cytoplasm, tight junction, membrane, postsynaptic membrane, neuronal cell body, postsynaptic density, dendritic spine, protein phosphatase type 2A complex, protein binding, calmodulin binding, protein complex binding, estrogen receptor binding, armadillo r…	FALSE	FALSE	FALSE	FALSE	FALSE	FALSE	FALSE	FALSE	FALSE	FALSE	FALSE	FALSE
ENSG00000115841	FAM82A1	integral to membrane, mitochondrion, microtubule, spindle pole	FALSE	FALSE	FALSE	FALSE	FALSE	FALSE	FALSE	FALSE	FALSE	FALSE	FALSE	FALSE
ENSG00000115946	PNO1	nucleolus, RNA binding	FALSE	FALSE	FALSE	FALSE	FALSE	FALSE	FALSE	FALSE	FALSE	FALSE	FALSE	FALSE
ENSG00000116032	GRIN3B	transport, protein insertion into membrane, regulation of calcium ion transport, ionotropic glutamate receptor signaling pathway, calcium ion transmembrane transport, membrane, cell junction, outer membrane-bounded periplasmic space, postsynaptic membrane, neuronal cell body, N-methyl-D-aspartate selective glutamate receptor complex, transporter activity, ionotropic glutamate receptor activity, e…	FALSE	FALSE	FALSE	FALSE	FALSE	FALSE	FALSE	FALSE	FALSE	FALSE	FALSE	FALSE
ENSG00000116062	MSH6	reciprocal meiotic recombination, mismatch repair, DNA repair, ATP catabolic process, somatic hypermutation of immunoglobulin genes, intrinsic apoptotic signaling pathway in response to DNA damage response, response to UV, isotype switching, determination of adult lifespan, negative regulation of DNA recombination, intrinsic apoptotic signaling pathway, somatic recombination of immunoglobulin gen…	TRUE	FALSE	FALSE	FALSE	FALSE	FALSE	FALSE	FALSE	FALSE	FALSE	FALSE	FALSE
ENSG00000116095	PLEKHA3	biological_process, cellular_component, membrane, Golgi apparatus, protein binding, phospholipid binding, 1-phosphatidylinositol binding	TRUE	FALSE	FALSE	FALSE	FALSE	FALSE	TRUE	FALSE	FALSE	FALSE	FALSE	FALSE
ENSG00000116198	CEP104	centriole, binding	TRUE	FALSE	FALSE	FALSE	FALSE	FALSE	FALSE	FALSE	FALSE	FALSE	FALSE	FALSE
ENSG00000116212	LRRC42		FALSE	FALSE	FALSE	FALSE	FALSE	FALSE	FALSE	FALSE	FALSE	FALSE	FALSE	FALSE
ENSG00000116213	WRAP73	centrosome, protein binding	TRUE	FALSE	FALSE	FALSE	FALSE	FALSE	FALSE	FALSE	FALSE	FALSE	FALSE	FALSE
ENSG00000116260	QSOX1	oxidation-reduction process, cell redox homeostasis, protein thiol-disulfide exchange, extracellular space, integral to Golgi membrane, thiol oxidase activity, flavin-linked sulfhydryl oxidase activity, glycerol ether metabolic process, electron carrier activity, protein disulfide oxidoreductase activity	TRUE	FALSE	FALSE	FALSE	FALSE	FALSE	FALSE	FALSE	FALSE	FALSE	FALSE	FALSE
ENSG00000116273	PHF13	cell division, mitotic cell cycle, chromatin modification, chromosome segregation, mitotic chromosome condensation, nucleus, nucleoplasm, zinc ion binding, protein binding, chromatin binding, methylated histone residue binding	TRUE	FALSE	FALSE	FALSE	FALSE	FALSE	FALSE	FALSE	FALSE	FALSE	FALSE	FALSE
ENSG00000116299	KIAA1324	regulation of apoptotic process, macroautophagy, positive regulation of vacuole organization, positive regulation of autophagic vacuole assembly, trans-Golgi network, lysosome, integral to plasma membrane, late endosome, molecular_function	TRUE	FALSE	FALSE	FALSE	FALSE	FALSE	FALSE	FALSE	FALSE	FALSE	FALSE	FALSE
ENSG00000116497	S100PBP	calcium-dependent protein binding, nucleus	TRUE	FALSE	FALSE	FALSE	FALSE	FALSE	FALSE	FALSE	FALSE	FALSE	FALSE	FALSE
ENSG00000116580	GON4L	regulation of transcription, DNA-dependent, nucleus, DNA binding, chromatin binding	FALSE	FALSE	FALSE	FALSE	FALSE	FALSE	FALSE	FALSE	FALSE	FALSE	FALSE	FALSE
ENSG00000116670	MAD2L2	transcription, DNA-dependent, positive regulation of transcription, DNA-dependent, mitosis, cell division, regulation of cell growth, DNA repair, positive regulation of peptidyl-serine phosphorylation, double-strand break repair, negative regulation of protein catabolic process, mitotic cell cycle spindle assembly checkpoint, negative regulation of mitotic anaphase-promoting complex activity, DNA…	TRUE	FALSE	FALSE	FALSE	FALSE	FALSE	FALSE	FALSE	FALSE	FALSE	FALSE	FALSE
ENSG00000116685	KIAA2013	integral to membrane	TRUE	FALSE	FALSE	FALSE	FALSE	FALSE	FALSE	FALSE	FALSE	FALSE	FALSE	FALSE
ENSG00000116688	MFN2	protein targeting to mitochondrion, negative regulation of smooth muscle cell proliferation, camera-type eye morphogenesis, blood coagulation, blastocyst formation, mitochondrial fusion, mitochondrial membrane organization, negative regulation of Ras protein signal transduction, GTP catabolic process, mitochondrion localization, integral to membrane, cytosol, mitochondrion, mitochondrial outer me…	TRUE	FALSE	FALSE	FALSE	FALSE	FALSE	FALSE	FALSE	FALSE	FALSE	FALSE	FALSE
ENSG00000116690	PRG4	immune response, scavenger receptor activity, polysaccharide binding, cell proliferation, extracellular region	FALSE	FALSE	FALSE	FALSE	FALSE	FALSE	FALSE	FALSE	FALSE	FALSE	FALSE	FALSE
ENSG00000116691	MIIP		TRUE	FALSE	FALSE	FALSE	FALSE	FALSE	FALSE	FALSE	FALSE	FALSE	FALSE	FALSE
ENSG00000116786	PLEKHM2	Golgi organization, cytoplasm, protein binding, phospholipid binding, kinesin binding	FALSE	FALSE	FALSE	FALSE	FALSE	FALSE	FALSE	FALSE	FALSE	FALSE	FALSE	FALSE
ENSG00000116824	CD2	induction of apoptosis, cell adhesion, cell-cell adhesion, cell surface receptor signaling pathway, T cell activation, membrane raft polarization, leukocyte migration, blood coagulation, regulation of T cell differentiation, natural killer cell activation, positive regulation of myeloid dendritic cell activation, integral to membrane, plasma membrane, extracellular region, integral to plasma memb…	FALSE	FALSE	FALSE	FALSE	FALSE	FALSE	FALSE	FALSE	FALSE	FALSE	FALSE	FALSE
ENSG00000116863	ADPRHL2	nucleus, cytoplasm, metal ion binding, poly(ADP-ribose) glycohydrolase activity	FALSE	FALSE	FALSE	FALSE	FALSE	FALSE	FALSE	FALSE	FALSE	FALSE	FALSE	FALSE
ENSG00000116898	MRPS15	translation, intracellular, mitochondrion, ribosome, nuclear membrane, mitochondrial small ribosomal subunit, structural constituent of ribosome	FALSE	FALSE	FALSE	FALSE	FALSE	FALSE	FALSE	FALSE	FALSE	FALSE	FALSE	FALSE
ENSG00000116954	RRAGC	transcription, DNA-dependent, apoptotic process, small GTPase mediated signal transduction, RNA splicing, cell growth, cellular protein localization, cellular response to amino acid stimulus, positive regulation of TOR signaling cascade, GTP catabolic process, nucleus, cytoplasm, lysosome, protein binding, GTP binding, magnesium ion binding, protein heterodimerization activity, GTPase activity, G…	FALSE	FALSE	FALSE	FALSE	FALSE	FALSE	FALSE	FALSE	FALSE	FALSE	FALSE	FALSE
ENSG00000116977	LGALS8	carbohydrate binding, cytoplasm, extracellular space, plasma cell differentiation, T cell costimulation	TRUE	FALSE	FALSE	FALSE	FALSE	FALSE	FALSE	FALSE	FALSE	FALSE	FALSE	FALSE
ENSG00000117226	GBP3	defense response to virus, cytoplasm, membrane, GTP binding, GTPase activity	TRUE	FALSE	FALSE	FALSE	FALSE	FALSE	FALSE	FALSE	FALSE	FALSE	FALSE	FALSE
ENSG00000117281	CD160	cell proliferation, regulation of immune response, cell surface receptor signaling pathway, cellular defense response, plasma membrane, anchored to plasma membrane, receptor binding, receptor activity, MHC class I receptor activity	FALSE	FALSE	FALSE	FALSE	FALSE	FALSE	FALSE	FALSE	FALSE	FALSE	FALSE	FALSE
ENSG00000117410	ATP6V0B	ATP hydrolysis coupled proton transport, integral to membrane, endosome, proton-transporting V-type ATPase, V0 domain, proton-transporting two-sector ATPase complex, proton-transporting domain, hydrogen ion transmembrane transporter activity, transmembrane transport, insulin receptor signaling pathway, proton transport, cellular iron ion homeostasis, transferrin transport, interaction with host, …	TRUE	FALSE	FALSE	FALSE	FALSE	FALSE	TRUE	FALSE	FALSE	FALSE	FALSE	FALSE
ENSG00000117481	NSUN4	mitochondrion, mitochondrial large ribosomal subunit, methyltransferase activity	TRUE	FALSE	FALSE	FALSE	FALSE	FALSE	FALSE	FALSE	FALSE	FALSE	FALSE	FALSE
ENSG00000117500	TMED5	protein transport, transport, Golgi ribbon formation, integral to membrane, endoplasmic reticulum membrane, Golgi apparatus, cis-Golgi network, endoplasmic reticulum exit site, endoplasmic reticulum-Golgi intermediate compartment, endoplasmic reticulum-Golgi intermediate compartment membrane	TRUE	FALSE	FALSE	FALSE	FALSE	FALSE	FALSE	FALSE	TRUE	FALSE	FALSE	FALSE
ENSG00000117640	FAM54B		TRUE	FALSE	FALSE	FALSE	FALSE	FALSE	FALSE	FALSE	FALSE	FALSE	FALSE	FALSE
ENSG00000117748	RPA2	DNA repair, mitotic cell cycle, cell cycle checkpoint, S phase of mitotic cell cycle, M/G1 transition of mitotic cell cycle, DNA replication, nucleotide-excision repair, telomere maintenance, double-strand break repair, double-strand break repair via homologous recombination, DNA-dependent DNA replication, G1/S transition of mitotic cell cycle, transcription-coupled nucleotide-excision repair, re…	TRUE	FALSE	FALSE	FALSE	FALSE	FALSE	FALSE	FALSE	FALSE	FALSE	FALSE	FALSE
ENSG00000117859	OSBPL9	lipid transport, protein binding, phospholipid binding	TRUE	FALSE	FALSE	FALSE	FALSE	FALSE	FALSE	FALSE	FALSE	FALSE	FALSE	FALSE
ENSG00000117862	TXNDC12	cell redox homeostasis, endoplasmic reticulum lumen, protein-disulfide reductase (glutathione) activity	TRUE	FALSE	FALSE	FALSE	FALSE	FALSE	FALSE	FALSE	FALSE	FALSE	FALSE	FALSE
ENSG00000118162	KPTN	actin filament organization, sensory perception of sound, cellular component movement, nucleus, perinuclear region of cytoplasm, growth cone, microtubule organizing center, actin cytoskeleton, stereocilium, actin binding	FALSE	FALSE	FALSE	FALSE	FALSE	FALSE	FALSE	FALSE	FALSE	FALSE	FALSE	FALSE
ENSG00000118181	RPS25	translation, viral reproduction, gene expression, RNA metabolic process, mRNA metabolic process, translational elongation, cellular protein metabolic process, SRP-dependent cotranslational protein targeting to membrane, translational initiation, viral infectious cycle, nuclear-transcribed mRNA catabolic process, nonsense-mediated decay, ribosomal small subunit assembly, translational termination,…	TRUE	FALSE	FALSE	FALSE	FALSE	FALSE	FALSE	FALSE	FALSE	FALSE	FALSE	FALSE
ENSG00000118363	SPCS2	proteolysis, small molecule metabolic process, translation, gene expression, cellular protein metabolic process, signal peptide processing, SRP-dependent cotranslational protein targeting to membrane, regulation of insulin secretion, energy reserve metabolic process, integral to membrane, endoplasmic reticulum membrane, signal peptidase complex, peptidase activity	FALSE	FALSE	FALSE	FALSE	FALSE	FALSE	FALSE	FALSE	FALSE	FALSE	FALSE	FALSE
ENSG00000118496	FBXO30	zinc ion binding, protein binding, ubiquitin-protein ligase activity	FALSE	FALSE	FALSE	FALSE	FALSE	FALSE	FALSE	FALSE	FALSE	FALSE	FALSE	FALSE
ENSG00000118518	RNF146	Wnt receptor signaling pathway, protein ubiquitination involved in ubiquitin-dependent protein catabolic process, positive regulation of canonical Wnt receptor signaling pathway, protein autoubiquitination, protein K48-linked ubiquitination, nucleus, cytosol, zinc ion binding, protein binding, ubiquitin-protein ligase activity, poly-ADP-D-ribose binding	FALSE	FALSE	FALSE	FALSE	FALSE	FALSE	FALSE	FALSE	FALSE	FALSE	FALSE	FALSE
ENSG00000118690	ARMC2	protein binding, binding	FALSE	FALSE	FALSE	FALSE	FALSE	FALSE	FALSE	FALSE	FALSE	FALSE	FALSE	FALSE
ENSG00000118762	PKD2	transmembrane transport, negative regulation of cell proliferation, ion transport, heart development, negative regulation of G1/S transition of mitotic cell cycle, positive regulation of transcription from RNA polymerase II promoter, determination of left/right symmetry, calcium ion transport, cell cycle arrest, centrosome duplication, branching involved in ureteric bud morphogenesis, positive re…	TRUE	FALSE	FALSE	FALSE	FALSE	FALSE	FALSE	FALSE	FALSE	FALSE	FALSE	FALSE
ENSG00000118971	CCND2	cell cycle, spermatogenesis, cell division, response to estradiol stimulus, response to organic cyclic compound, response to cAMP, regulation of cell cycle, cellular response to insulin stimulus, regulation of cyclin-dependent protein kinase activity, ovarian follicle development, response to testosterone stimulus, liver development, response to ethanol, regulation of neuron differentiation, posi…	TRUE	FALSE	FALSE	FALSE	FALSE	FALSE	FALSE	FALSE	FALSE	FALSE	FALSE	FALSE
ENSG00000118997	DNAH7	microtubule-based movement, ciliary or flagellar motility, cytoplasm, microtubule, cilium axoneme, cilium, dynein complex, axonemal dynein complex, ATP binding, microtubule motor activity, SRP-dependent cotranslational protein targeting to membrane, negative regulation of translational elongation, signal recognition particle, nucleotide binding, nucleoside-triphosphatase activity, 7S RNA binding	TRUE	FALSE	FALSE	FALSE	FALSE	FALSE	FALSE	FALSE	FALSE	FALSE	FALSE	FALSE
ENSG00000119139	TJP2	protein binding, plasma membrane, tight junction, apoptotic process, hippo signaling cascade, cellular component disassembly involved in execution phase of apoptosis, cytoplasm, cytosol, cell junction, nucleoplasm, adherens junction, guanylate kinase activity	TRUE	FALSE	FALSE	FALSE	FALSE	FALSE	FALSE	FALSE	FALSE	FALSE	FALSE	FALSE
ENSG00000119321	FKBP15	protein folding, termination of G-protein coupled receptor signaling pathway, negative regulation of phosphatase activity, endocytosis, axon, growth cone, early endosome, actin filament, actin binding	TRUE	FALSE	FALSE	FALSE	FALSE	FALSE	FALSE	FALSE	FALSE	FALSE	FALSE	FALSE
ENSG00000119328	FAM206A	glycine catabolic process, glycine cleavage complex	TRUE	FALSE	FALSE	FALSE	FALSE	FALSE	FALSE	FALSE	TRUE	FALSE	FALSE	FALSE
ENSG00000119397	CNTRL	protein binding, cell division, mitotic cell cycle, G2/M transition of mitotic cell cycle, cytosol, centrosome, nucleotide binding	TRUE	FALSE	FALSE	FALSE	FALSE	FALSE	FALSE	FALSE	FALSE	FALSE	FALSE	FALSE
ENSG00000119414	PPP6C	protein dephosphorylation, G1/S transition of mitotic cell cycle, cytosol, protein binding, metal ion binding, hydrolase activity, protein serine/threonine phosphatase activity, phosphoprotein phosphatase activity	TRUE	FALSE	FALSE	FALSE	FALSE	FALSE	FALSE	FALSE	FALSE	FALSE	FALSE	FALSE
ENSG00000119685	TTLL5	cellular protein modification process, tubulin-tyrosine ligase activity, transcription, DNA-dependent, nucleus, centrosome, cilium, microtubule basal body	TRUE	FALSE	FALSE	FALSE	FALSE	FALSE	FALSE	FALSE	FALSE	FALSE	FALSE	FALSE
ENSG00000119820	YIPF4	integral to membrane, membrane, endoplasmic reticulum, Golgi apparatus	FALSE	FALSE	FALSE	FALSE	FALSE	FALSE	FALSE	FALSE	FALSE	FALSE	FALSE	FALSE
ENSG00000120008	WDR11	integral to membrane, cytoplasm, cilium, protein binding	TRUE	FALSE	FALSE	FALSE	FALSE	FALSE	FALSE	FALSE	FALSE	FALSE	FALSE	FALSE
ENSG00000120137	PANK3	coenzyme A biosynthetic process, cytoplasm, ATP binding, pantothenate kinase activity	TRUE	FALSE	FALSE	FALSE	FALSE	FALSE	FALSE	FALSE	FALSE	FALSE	FALSE	FALSE
ENSG00000120162	MOB3B	protein binding, metal ion binding	FALSE	FALSE	FALSE	FALSE	FALSE	FALSE	FALSE	FALSE	FALSE	FALSE	FALSE	FALSE
ENSG00000120533	ENY2	transcription, DNA-dependent, positive regulation of transcription, DNA-dependent, mRNA transport, histone deubiquitination, SAGA complex, transcription coactivator activity, ligand-dependent nuclear receptor transcription coactivator activity	TRUE	FALSE	FALSE	FALSE	FALSE	FALSE	FALSE	FALSE	FALSE	FALSE	FALSE	FALSE
ENSG00000120688	WBP4	mRNA cis splicing, via spliceosome, nucleus, plasma membrane, spliceosomal complex, nuclear speck, zinc ion binding, protein binding, nucleic acid binding, proline-rich region binding	FALSE	FALSE	FALSE	FALSE	FALSE	FALSE	FALSE	FALSE	FALSE	FALSE	FALSE	FALSE
ENSG00000120800	UTP20	negative regulation of cell proliferation, rRNA processing, endonucleolytic cleavage in ITS1 to separate SSU-rRNA from 5.8S rRNA and LSU-rRNA from tricistronic rRNA transcript (SSU-rRNA, 5.8S rRNA, LSU-rRNA), endonucleolytic cleavage to generate mature 5'-end of SSU-rRNA from (SSU-rRNA, 5.8S rRNA, LSU-rRNA), endonucleolytic cleavage in 5'-ETS of tricistronic rRNA transcript (SSU-rRNA, 5.8S rRNA, …	FALSE	FALSE	FALSE	FALSE	FALSE	FALSE	FALSE	FALSE	FALSE	FALSE	FALSE	FALSE
ENSG00000120889	TNFRSF10B	apoptotic process, regulation of apoptotic process, positive regulation of I-kappaB kinase/NF-kappaB cascade, signal transduction, cell surface receptor signaling pathway, extrinsic apoptotic signaling pathway via death domain receptors, activation of cysteine-type endopeptidase activity involved in apoptotic process, activation of NF-kappaB-inducing kinase activity, cellular response to mechanic…	TRUE	FALSE	FALSE	FALSE	FALSE	FALSE	FALSE	FALSE	FALSE	FALSE	FALSE	FALSE
ENSG00000120913	PDLIM2	actin cytoskeleton, focal adhesion, stress fiber, cortical actin cytoskeleton, protein binding, myosin heavy chain binding, muscle alpha-actinin binding, nucleus, cell surface, zinc ion binding, alpha-actinin binding, filamin binding	FALSE	FALSE	FALSE	FALSE	FALSE	FALSE	FALSE	FALSE	FALSE	FALSE	FALSE	FALSE
ENSG00000121064	SCPEP1	proteolysis, retinoic acid metabolic process, extracellular region, cytosol, serine-type carboxypeptidase activity	TRUE	FALSE	FALSE	FALSE	FALSE	FALSE	FALSE	FALSE	FALSE	FALSE	FALSE	FALSE
ENSG00000121417	ZNF211	regulation of transcription, DNA-dependent, intracellular, zinc ion binding, nucleic acid binding, transcription, DNA-dependent, nucleus, DNA binding	FALSE	FALSE	FALSE	FALSE	FALSE	FALSE	FALSE	FALSE	FALSE	FALSE	FALSE	FALSE
ENSG00000121680	PEX16	protein targeting to peroxisome, peroxisome organization, protein import into peroxisome matrix, protein import into peroxisome membrane, protein complex localization, peroxisome membrane biogenesis, protein localization to endoplasmic reticulum, protein to membrane docking, ER-dependent peroxisome organization, endoplasmic reticulum membrane, endoplasmic reticulum, peroxisomal membrane, peroxiso…	FALSE	FALSE	FALSE	FALSE	FALSE	FALSE	FALSE	FALSE	FALSE	FALSE	FALSE	FALSE
ENSG00000121691	CAT	negative regulation of apoptotic process, hydrogen peroxide catabolic process, oxidation-reduction process, small molecule metabolic process, positive regulation of cell division, cholesterol metabolic process, response to hypoxia, response to hyperoxia, cellular response to growth factor stimulus, purine nucleobase metabolic process, triglyceride metabolic process, protein tetramerization, prote…	TRUE	FALSE	FALSE	FALSE	FALSE	FALSE	FALSE	FALSE	FALSE	FALSE	FALSE	FALSE
ENSG00000121988	ZRANB3	DNA repair, replication fork processing, response to DNA damage stimulus, response to UV, negative regulation of DNA recombination, replication fork protection, DNA strand renaturation, DNA rewinding, intracellular, nuclear replication fork, DNA binding, zinc ion binding, protein binding, ATP binding, nucleic acid binding, endonuclease activity, hydrolase activity, ATP-dependent helicase activity…	FALSE	FALSE	FALSE	FALSE	FALSE	FALSE	FALSE	FALSE	FALSE	FALSE	FALSE	FALSE
ENSG00000122026	RPL21	translation, viral reproduction, gene expression, RNA metabolic process, mRNA metabolic process, translational elongation, cellular protein metabolic process, SRP-dependent cotranslational protein targeting to membrane, translational initiation, viral infectious cycle, nuclear-transcribed mRNA catabolic process, nonsense-mediated decay, translational termination, viral transcription, cytosol, int…	TRUE	FALSE	FALSE	FALSE	FALSE	FALSE	FALSE	FALSE	FALSE	FALSE	FALSE	FALSE
ENSG00000122033	MTIF3	regulation of translational initiation, translational initiation, ribosome disassembly, mitochondrion, translation initiation factor activity, translation factor activity, nucleic acid binding, ribosomal small subunit binding	TRUE	FALSE	FALSE	FALSE	FALSE	FALSE	FALSE	FALSE	FALSE	FALSE	FALSE	FALSE
ENSG00000122218	COPA	cellular membrane organization, retrograde vesicle-mediated transport, Golgi to ER, intracellular protein transport, vesicle-mediated transport, COPI coating of Golgi vesicle, pancreatic juice secretion, cytoplasm, cytosol, extracellular space, COPI vesicle coat, membrane coat, protein binding, structural molecule activity, hormone activity	TRUE	FALSE	FALSE	FALSE	FALSE	FALSE	FALSE	FALSE	FALSE	FALSE	FALSE	FALSE
ENSG00000122490	PQLC1	integral to membrane	TRUE	FALSE	FALSE	FALSE	FALSE	FALSE	FALSE	FALSE	FALSE	FALSE	FALSE	FALSE
ENSG00000122497	NBPF14	cytoplasm	FALSE	FALSE	FALSE	FALSE	FALSE	FALSE	FALSE	FALSE	FALSE	FALSE	FALSE	FALSE
ENSG00000122696	SLC25A51	transport, integral to membrane, mitochondrial inner membrane	FALSE	FALSE	FALSE	FALSE	FALSE	FALSE	FALSE	FALSE	FALSE	FALSE	FALSE	FALSE
ENSG00000122729	ACO1	metabolic process, tricarboxylic acid cycle, post-embryonic development, regulation of translation, intestinal absorption, cellular iron ion homeostasis, citrate metabolic process, response to iron(II) ion, cytoplasm, cytosol, mitochondrion, endoplasmic reticulum, Golgi apparatus, RNA binding, protein binding, metal ion binding, aconitate hydratase activity, 4 iron, 4 sulfur cluster binding, iron…	FALSE	FALSE	FALSE	FALSE	FALSE	FALSE	FALSE	FALSE	FALSE	FALSE	FALSE	FALSE
ENSG00000122783	C7orf49	cytoplasm	TRUE	FALSE	FALSE	FALSE	FALSE	FALSE	FALSE	FALSE	FALSE	FALSE	FALSE	FALSE
ENSG00000122873	CISD1	regulation of cellular respiration, integral to membrane, mitochondrion, intracellular membrane-bounded organelle, mitochondrial outer membrane, metal ion binding, 2 iron, 2 sulfur cluster binding	TRUE	FALSE	FALSE	FALSE	FALSE	FALSE	FALSE	FALSE	FALSE	FALSE	FALSE	FALSE
ENSG00000122882	ECD	cell proliferation, regulation of transcription, DNA-dependent, transcription from RNA polymerase II promoter, regulation of G1/S transition of mitotic cell cycle, regulation of glycolysis, nucleus, cytoplasm, transcription coactivator activity, , protein binding	FALSE	FALSE	FALSE	FALSE	FALSE	FALSE	FALSE	FALSE	FALSE	FALSE	FALSE	FALSE
ENSG00000123143	PKN1	transcription, DNA-dependent, signal transduction, protein phosphorylation, regulation of transcription from RNA polymerase II promoter, activation of JUN kinase activity, epithelial cell migration, hyperosmotic response, regulation of cell motility, histone H3-T11 phosphorylation, nucleus, cytoplasm, plasma membrane, intracellular, midbody, endosome, cytoplasmic membrane-bounded vesicle, cleavag…	FALSE	FALSE	FALSE	FALSE	FALSE	FALSE	FALSE	FALSE	FALSE	FALSE	FALSE	FALSE
ENSG00000123338	NCKAP1L	negative regulation of apoptotic process, negative regulation of interleukin-17 production, regulation of transcription, DNA-dependent, response to drug, protein complex assembly, positive regulation of actin filament polymerization, myeloid cell homeostasis, positive regulation of B cell differentiation, cortical actin cytoskeleton organization, B cell homeostasis, negative regulation of interle…	TRUE	FALSE	FALSE	FALSE	FALSE	FALSE	FALSE	FALSE	FALSE	FALSE	FALSE	FALSE
ENSG00000123810	B9D2	cilium assembly, mitotic cell cycle, mitotic prometaphase, M phase of mitotic cell cycle, nucleus, cytosol, centrosome, cilium axoneme, microtubule basal body, TCTN-B9D complex, gamma-tubulin binding, protein binding	FALSE	FALSE	FALSE	FALSE	FALSE	FALSE	FALSE	FALSE	FALSE	FALSE	FALSE	FALSE
ENSG00000123815	ADCK4	integral to membrane, mitochondrion, protein serine/threonine kinase activity, transferase activity, transferring phosphorus-containing groups	FALSE	FALSE	FALSE	FALSE	FALSE	FALSE	FALSE	FALSE	FALSE	FALSE	FALSE	FALSE
ENSG00000124074	ENKD1	microtubule cytoskeleton	FALSE	FALSE	FALSE	FALSE	FALSE	FALSE	FALSE	FALSE	FALSE	FALSE	FALSE	FALSE
ENSG00000124177	CHD6	transcription, DNA-dependent, regulation of transcription, DNA-dependent, chromatin remodeling, nervous system development, nucleus, DNA binding, protein binding, ATP binding, nucleic acid binding, hydrolase activity, acting on acid anhydrides, hydrolase activity, ATP-dependent helicase activity, chromatin binding, helicase activity	FALSE	FALSE	FALSE	FALSE	FALSE	FALSE	FALSE	FALSE	FALSE	FALSE	FALSE	FALSE
ENSG00000124198	ARFGEF2	intracellular signal transduction, protein transport, regulation of ARF protein signal transduction, vesicle-mediated transport, endosome organization, exocytosis, positive regulation of tumor necrosis factor production, receptor recycling, Golgi to plasma membrane transport, endomembrane system organization, cytosol, intracellular, membrane, perinuclear region of cytoplasm, Golgi membrane, cell …	TRUE	FALSE	FALSE	FALSE	FALSE	FALSE	FALSE	FALSE	FALSE	FALSE	FALSE	FALSE
ENSG00000124356	STAMBP	proteolysis, cytokinesis after mitosis, positive regulation of cell proliferation, JAK-STAT cascade, protein deubiquitination, nucleus, cytoplasm, plasma membrane, early endosome, cleavage furrow, protein binding, metal ion binding, metallopeptidase activity, ubiquitin-specific protease activity, , negative regulation of apoptotic process	TRUE	FALSE	FALSE	FALSE	FALSE	FALSE	FALSE	FALSE	FALSE	FALSE	FALSE	FALSE
ENSG00000124357	NAGK	N-acetylglucosamine metabolic process, N-acetylmannosamine metabolic process, protein binding, ATP binding, N-acylmannosamine kinase activity, N-acetylglucosamine kinase activity	TRUE	FALSE	FALSE	FALSE	FALSE	FALSE	FALSE	FALSE	FALSE	FALSE	FALSE	FALSE
ENSG00000124593	PRICKLE4	biological_process, nucleus, molecular_function, zinc ion binding	FALSE	FALSE	FALSE	FALSE	FALSE	FALSE	FALSE	FALSE	FALSE	FALSE	FALSE	FALSE
ENSG00000125107	CNOT1	transcription, DNA-dependent, regulation of transcription, DNA-dependent, gene expression, RNA metabolic process, mRNA metabolic process, nuclear-transcribed mRNA poly(A) tail shortening, nuclear-transcribed mRNA catabolic process, deadenylation-dependent decay, cytosol, cytoplasmic mRNA processing body, peroxisomal membrane, protein binding, binding	FALSE	FALSE	FALSE	FALSE	FALSE	FALSE	FALSE	FALSE	FALSE	FALSE	FALSE	FALSE
ENSG00000125485	DDX31	nucleolus, RNA binding, ATP binding, nucleic acid binding, ATP-dependent helicase activity, helicase activity	FALSE	FALSE	FALSE	FALSE	FALSE	FALSE	FALSE	FALSE	FALSE	FALSE	FALSE	FALSE
ENSG00000125551	PLGLB2	extracellular region	TRUE	FALSE	FALSE	FALSE	FALSE	FALSE	FALSE	FALSE	FALSE	FALSE	FALSE	FALSE
ENSG00000125686	MED1	negative regulation of transcription from RNA polymerase II promoter, positive regulation of transcription, DNA-dependent, negative regulation of apoptotic process, cellular lipid metabolic process, small molecule metabolic process, brain development, positive regulation of transcription from RNA polymerase II promoter, cell morphogenesis, organ regeneration, angiogenesis, gene expression, DNA re…	TRUE	FALSE	FALSE	FALSE	FALSE	FALSE	FALSE	FALSE	FALSE	FALSE	FALSE	FALSE
ENSG00000125691	RPL23	translation, viral reproduction, gene expression, RNA metabolic process, mRNA metabolic process, translational elongation, cellular protein metabolic process, ribosomal protein import into nucleus, SRP-dependent cotranslational protein targeting to membrane, translational initiation, viral infectious cycle, nuclear-transcribed mRNA catabolic process, nonsense-mediated decay, translational termina…	FALSE	FALSE	FALSE	FALSE	FALSE	FALSE	FALSE	FALSE	FALSE	FALSE	FALSE	FALSE
ENSG00000125734	GPR108	integral to membrane	TRUE	FALSE	FALSE	FALSE	FALSE	FALSE	FALSE	FALSE	FALSE	FALSE	FALSE	FALSE
ENSG00000125741	OPA3	visual perception, response to stimulus, mitochondrion	TRUE	FALSE	FALSE	FALSE	FALSE	FALSE	FALSE	FALSE	FALSE	FALSE	FALSE	FALSE
ENSG00000125821	DTD1	D-amino acid catabolic process, cytoplasm, nucleolus, hydrolase activity, acting on ester bonds	TRUE	FALSE	FALSE	FALSE	FALSE	FALSE	FALSE	FALSE	FALSE	FALSE	FALSE	FALSE
ENSG00000125910	S1PR4	G-protein coupled receptor signaling pathway, immune response, elevation of cytosolic calcium ion concentration, adenylate cyclase-activating G-protein coupled receptor signaling pathway, activation of phospholipase C activity, integral to membrane, plasma membrane, integral to plasma membrane, lipid binding, G-protein coupled receptor activity, sphingosine-1-phosphate receptor activity	FALSE	FALSE	FALSE	FALSE	FALSE	FALSE	FALSE	FALSE	FALSE	FALSE	FALSE	FALSE
ENSG00000125912	NCLN	proteolysis, protein processing, integral to membrane, peptidase activity, regulation of signal transduction, nucleus, endoplasmic reticulum membrane, membrane, endoplasmic reticulum, intracellular membrane-bounded organelle, protein binding	FALSE	FALSE	FALSE	FALSE	FALSE	FALSE	FALSE	FALSE	FALSE	FALSE	FALSE	FALSE
ENSG00000126215	XRCC3	transcription, DNA-dependent, DNA repair, DNA recombination, response to DNA damage stimulus, DNA metabolic process, nucleus, cytoplasm, mitochondrion, perinuclear region of cytoplasm, DNA binding, protein binding, ATP binding, DNA-directed RNA polymerase activity, DNA-dependent ATPase activity, response to organic substance	FALSE	FALSE	FALSE	FALSE	FALSE	FALSE	FALSE	FALSE	FALSE	FALSE	FALSE	FALSE
ENSG00000126247	CAPNS1	proteolysis, positive regulation of cell proliferation, cytoplasm, plasma membrane, protein binding, calcium ion binding, protein heterodimerization activity, calcium-dependent cysteine-type endopeptidase activity	FALSE	FALSE	FALSE	FALSE	FALSE	FALSE	FALSE	FALSE	FALSE	FALSE	FALSE	FALSE
ENSG00000126391	FRMD8	cytoskeleton	FALSE	FALSE	FALSE	FALSE	FALSE	FALSE	FALSE	FALSE	FALSE	FALSE	FALSE	FALSE
ENSG00000126432	PRDX5	negative regulation of apoptotic process, inflammatory response, hydrogen peroxide catabolic process, oxidation-reduction process, response to oxidative stress, negative regulation of cysteine-type endopeptidase activity involved in apoptotic process, cellular response to reactive oxygen species, negative regulation of transcription from RNA polymerase III promoter, positive regulation of collage…	TRUE	FALSE	FALSE	FALSE	FALSE	FALSE	FALSE	FALSE	FALSE	FALSE	FALSE	FALSE
ENSG00000126709	IFI6	negative regulation of apoptotic process, immune response, negative regulation of cysteine-type endopeptidase activity involved in apoptotic process, cytokine-mediated signaling pathway, release of cytochrome c from mitochondria, type I interferon-mediated signaling pathway, negative regulation of mitochondrial depolarization, integral to membrane, plasma membrane, mitochondrion, protein binding	FALSE	FALSE	FALSE	FALSE	FALSE	FALSE	FALSE	FALSE	FALSE	FALSE	FALSE	FALSE
ENSG00000126821	SGPP1	apoptotic process, small molecule metabolic process, phospholipid metabolic process, sphingolipid metabolic process, sphingolipid biosynthetic process, sphingosine metabolic process, sphinganine-1-phosphate metabolic process, integral to membrane, endoplasmic reticulum membrane, membrane, endoplasmic reticulum, catalytic activity, sphingosine-1-phosphate phosphatase activity	FALSE	FALSE	FALSE	FALSE	FALSE	FALSE	FALSE	FALSE	FALSE	FALSE	FALSE	FALSE
ENSG00000127220	ABHD8	hydrolase activity	TRUE	FALSE	FALSE	FALSE	FALSE	FALSE	FALSE	FALSE	FALSE	FALSE	FALSE	FALSE
ENSG00000127311	HELB	DNA replication, DNA replication, synthesis of RNA primer, DNA-dependent DNA replication, alpha DNA polymerase:primase complex, ATP binding, ATP-dependent 5'-3' DNA helicase activity, single-stranded DNA-dependent ATP-dependent DNA helicase activity, ATP-dependent DNA helicase activity	TRUE	FALSE	FALSE	FALSE	FALSE	FALSE	FALSE	FALSE	FALSE	FALSE	FALSE	FALSE
ENSG00000127334	DYRK2	ribonucleoprotein complex, protein phosphorylation, smoothened signaling pathway, response to DNA damage stimulus, positive regulation of glycogen biosynthetic process, intrinsic apoptotic signaling pathway in response to DNA damage by p53 class mediator, nucleus, cytoplasm, intracellular membrane-bounded organelle, ubiquitin ligase complex, ATP binding, protein serine/threonine kinase activity, …	FALSE	FALSE	FALSE	FALSE	FALSE	FALSE	FALSE	FALSE	FALSE	FALSE	FALSE	FALSE
ENSG00000127463	EMC1	integral to membrane, ER membrane protein complex	TRUE	FALSE	FALSE	FALSE	FALSE	FALSE	FALSE	FALSE	FALSE	FALSE	FALSE	FALSE
ENSG00000128271	ADORA2A	negative regulation of cell proliferation, protein kinase C-activating G-protein coupled receptor signaling pathway, G-protein coupled receptor signaling pathway, regulation of transcription, DNA-dependent, neuron projection morphogenesis, response to drug, regulation of excitatory postsynaptic membrane potential, locomotory behavior, negative regulation of cysteine-type endopeptidase activity in…	FALSE	FALSE	FALSE	FALSE	FALSE	FALSE	FALSE	FALSE	FALSE	FALSE	FALSE	FALSE
ENSG00000128567	PODXL	cell adhesion, positive regulation of cell migration, cell migration, leukocyte migration, negative regulation of cell adhesion, negative regulation of cell-cell adhesion, glomerular visceral epithelial cell development, regulation of microvillus assembly, positive regulation of cell-cell adhesion mediated by integrin, epithelial tube formation, cytoplasm, plasma membrane, ruffle, integral to pla…	FALSE	FALSE	FALSE	FALSE	FALSE	FALSE	FALSE	FALSE	FALSE	FALSE	FALSE	FALSE
ENSG00000128590	DNAJB9	protein folding, ER-associated protein catabolic process, endoplasmic reticulum unfolded protein response, activation of signaling protein activity involved in unfolded protein response, cytoplasm, endoplasmic reticulum membrane, endoplasmic reticulum, nucleolus, protein binding, unfolded protein binding, heat shock protein binding, misfolded protein binding	FALSE	FALSE	FALSE	FALSE	FALSE	FALSE	FALSE	FALSE	FALSE	FALSE	FALSE	FALSE
ENSG00000128833	MYO5C	myosin complex, protein binding, ATP binding, actin binding, calmodulin binding, motor activity, actin filament binding	FALSE	FALSE	FALSE	FALSE	FALSE	FALSE	FALSE	FALSE	FALSE	FALSE	FALSE	FALSE
ENSG00000128872	TMOD2	nervous system development, learning or memory, neuron-neuron synaptic transmission, positive regulation of G-protein coupled receptor protein signaling pathway, cytoplasm, cytoskeleton, growth cone, neuron projection, actin binding, tropomyosin binding	TRUE	FALSE	FALSE	FALSE	FALSE	FALSE	FALSE	FALSE	FALSE	FALSE	FALSE	FALSE
ENSG00000128944	C15orf23	cell division, chromosome segregation, mitotic sister chromatid segregation, spindle organization, regulation of attachment of spindle microtubules to kinetochore, mitotic anaphase, nucleus, cytoplasm, spindle pole, condensed chromosome kinetochore, mitotic spindle, kinetochore, microtubule plus end, protein binding	TRUE	FALSE	FALSE	FALSE	FALSE	FALSE	FALSE	FALSE	FALSE	FALSE	FALSE	FALSE
ENSG00000128951	DUT	dUTP metabolic process, hydrolase activity, dUTP diphosphatase activity, small molecule metabolic process, DNA replication, nucleobase-containing compound metabolic process, pyrimidine nucleobase metabolic process, nucleobase-containing small molecule metabolic process, pyrimidine nucleoside biosynthetic process, dUMP biosynthetic process, nucleus, mitochondrion, nucleoplasm, protein binding	TRUE	FALSE	FALSE	FALSE	FALSE	FALSE	FALSE	FALSE	FALSE	FALSE	FALSE	FALSE
ENSG00000128973	CLN6	protein catabolic process, visual perception, cholesterol metabolic process, ganglioside metabolic process, cell death, glycosaminoglycan metabolic process, positive regulation of proteolysis, lysosomal lumen acidification, locomotion involved in locomotory behavior, cellular macromolecule catabolic process, lysosome organization, integral to membrane, endoplasmic reticulum membrane, endoplasmic …	TRUE	FALSE	FALSE	FALSE	FALSE	FALSE	FALSE	FALSE	FALSE	FALSE	FALSE	FALSE
ENSG00000128989	ARPP19	mitosis, cell division, G2/M transition of mitotic cell cycle, positive regulation of glucose import, positive regulation of gluconeogenesis, cytoplasm, receptor binding, protein phosphatase type 2A regulator activity, protein phosphatase inhibitor activity, potassium channel regulator activity, phosphatase inhibitor activity, protein phosphatase 2A binding	TRUE	FALSE	FALSE	FALSE	FALSE	FALSE	FALSE	FALSE	FALSE	FALSE	FALSE	FALSE
ENSG00000129003	VPS13C	protein localization	TRUE	FALSE	FALSE	FALSE	FALSE	FALSE	FALSE	FALSE	FALSE	FALSE	FALSE	FALSE
ENSG00000129007	CALML4	calcium ion binding	TRUE	FALSE	FALSE	FALSE	FALSE	FALSE	FALSE	FALSE	FALSE	FALSE	FALSE	FALSE
ENSG00000129219	PLD2	cytoskeleton organization, small GTPase mediated signal transduction, small molecule metabolic process, cell communication, positive regulation of cell adhesion, response to hypoxia, response to organic cyclic compound, metabolic process, positive regulation of cell migration, phospholipid metabolic process, response to hydrogen peroxide, positive regulation of mast cell degranulation, positive r…	TRUE	FALSE	FALSE	FALSE	FALSE	FALSE	FALSE	FALSE	FALSE	FALSE	FALSE	FALSE
ENSG00000129235	TXNDC17	tumor necrosis factor-mediated signaling pathway, cytosol, protein binding, peroxidase activity, electron carrier activity, protein-disulfide reductase activity	TRUE	FALSE	FALSE	FALSE	FALSE	FALSE	FALSE	FALSE	FALSE	FALSE	FALSE	FALSE
ENSG00000129493	HEATR5A	binding	TRUE	FALSE	FALSE	FALSE	FALSE	FALSE	FALSE	FALSE	FALSE	FALSE	FALSE	FALSE
ENSG00000129566	TEP1	protein binding, telomere maintenance via recombination, cytoplasm, ribonucleoprotein complex, chromosome, telomeric region, nuclear matrix, telomerase holoenzyme complex, RNA binding, ATP binding, telomerase activity	TRUE	FALSE	FALSE	FALSE	FALSE	FALSE	FALSE	FALSE	FALSE	FALSE	FALSE	FALSE
ENSG00000129968	FAM108A1	extracellular region, hydrolase activity	FALSE	FALSE	FALSE	FALSE	FALSE	FALSE	FALSE	FALSE	FALSE	FALSE	FALSE	FALSE
ENSG00000130038	EFCAB4B	small GTPase mediated signal transduction, protein transport, signal transduction, intracellular protein transport, nucleocytoplasmic transport, positive regulation of calcium ion transport, store-operated calcium entry, activation of store-operated calcium channel activity, GTP catabolic process, nucleus, cytoplasm, intracellular, membrane, nucleolus, Golgi apparatus, protein binding, calcium io…	TRUE	FALSE	FALSE	FALSE	FALSE	FALSE	FALSE	FALSE	FALSE	FALSE	FALSE	FALSE
ENSG00000130202	PVRL2	regulation of immune response, cytoskeleton organization, fertilization, homophilic cell adhesion, spermatid development, positive regulation of natural killer cell mediated cytotoxicity, viral entry into host cell via membrane fusion with the plasma membrane, spermatid nucleus differentiation, cell-cell junction organization, acrosome assembly, establishment of mitochondrion localization, suscep…	TRUE	FALSE	FALSE	FALSE	FALSE	FALSE	FALSE	FALSE	FALSE	FALSE	FALSE	FALSE
ENSG00000130227	XPO7	protein export from nucleus, mRNA transport, intracellular protein transport, nucleus, cytoplasm, nuclear pore, protein transporter activity, nuclear export signal receptor activity, binding, intracellular	TRUE	FALSE	FALSE	FALSE	FALSE	FALSE	FALSE	FALSE	FALSE	FALSE	FALSE	FALSE
ENSG00000130244	FAM98C		TRUE	FALSE	FALSE	FALSE	FALSE	FALSE	FALSE	FALSE	FALSE	FALSE	TRUE	FALSE
ENSG00000130270	ATP8B3	ATP catabolic process, metabolic process, binding of sperm to zona pellucida, cation transport, phospholipid translocation, phospholipid transport, integral to membrane, membrane, acrosomal vesicle, nucleotide binding, ATP binding, metal ion binding, magnesium ion binding, catalytic activity, ATPase activity, ATPase activity, coupled to transmembrane movement of ions, phosphorylative mechanism, h…	TRUE	FALSE	FALSE	FALSE	FALSE	FALSE	FALSE	FALSE	FALSE	FALSE	FALSE	FALSE
ENSG00000130347	RTN4IP1	oxidation-reduction process, mitochondrion, nucleotide binding, zinc ion binding, oxidoreductase activity, transferase activity, transferring acyl groups other than amino-acyl groups	FALSE	FALSE	FALSE	FALSE	FALSE	FALSE	FALSE	FALSE	FALSE	FALSE	FALSE	FALSE
ENSG00000130706	ADRM1	transcription elongation from RNA polymerase II promoter, proteasome assembly, positive regulation of endopeptidase activity, nucleus, cytoplasm, plasma membrane, membrane, integral to plasma membrane, proteasome complex, protein binding, endopeptidase activator activity, protease binding, proteasome binding	FALSE	FALSE	FALSE	FALSE	FALSE	FALSE	FALSE	FALSE	FALSE	FALSE	FALSE	FALSE
ENSG00000130725	UBE2M	protein ubiquitination, cellular protein modification process, positive regulation of neuron apoptotic process, protein neddylation, cellular_component, protein binding, ATP binding, ubiquitin-protein ligase activity, acid-amino acid ligase activity, NEDD8 ligase activity, ribosomal S6-glutamic acid ligase activity	FALSE	FALSE	FALSE	FALSE	FALSE	FALSE	FALSE	FALSE	FALSE	FALSE	FALSE	FALSE
ENSG00000130734	ATG4D	proteolysis, autophagy, protein transport, cytoplasm, cysteine-type peptidase activity, cysteine-type endopeptidase activity	FALSE	FALSE	FALSE	FALSE	FALSE	FALSE	FALSE	FALSE	FALSE	FALSE	FALSE	FALSE
ENSG00000130770	ATPIF1	regulation of apoptotic process, protein homooligomerization, negative regulation of hydrolase activity, angiogenesis, protein homotetramerization, reactive oxygen species metabolic process, negative regulation of endothelial cell proliferation, negative regulation of nucleotide metabolic process, generation of precursor metabolites and energy, mitochondrion, cell surface, mitochondrial proton-tr…	TRUE	FALSE	FALSE	FALSE	FALSE	FALSE	FALSE	FALSE	FALSE	FALSE	FALSE	FALSE
ENSG00000131018	SYNE1	transmembrane transport, transport, integral to membrane, nucleus, cytoplasm, nuclear membrane, protein binding, ATP binding, ATPase activity, coupled to transmembrane movement of substances, actin binding, cell death, Golgi organization, muscle cell differentiation, nucleus organization, cytoskeletal anchoring at nuclear membrane, nuclear matrix anchoring at nuclear membrane, Golgi apparatus, cy…	TRUE	FALSE	FALSE	FALSE	FALSE	FALSE	FALSE	FALSE	FALSE	FALSE	FALSE	FALSE
ENSG00000131069	ACSS2	metabolic process, catalytic activity, , small molecule metabolic process, lipid biosynthetic process, acetyl-CoA biosynthetic process from acetate, xenobiotic metabolic process, acetyl-CoA biosynthetic process, ethanol oxidation, nucleus, cytoplasm, cytosol, intracellular membrane-bounded organelle, ATP binding, AMP binding, acetate-CoA ligase activity, propionate biosynthetic process, acetate b…	FALSE	FALSE	FALSE	FALSE	FALSE	FALSE	FALSE	FALSE	FALSE	FALSE	FALSE	FALSE
ENSG00000131165	CHMP1A	transcription, DNA-dependent, cell division, negative regulation of transcription, DNA-dependent, protein transport, vesicle-mediated transport, negative regulation of S phase of mitotic cell cycle, gene silencing, mitotic chromosome condensation, negative regulation of transcription by glucose, endosome membrane, endomembrane system, microtubule organizing center, early endosome, condensed nucle…	FALSE	FALSE	FALSE	FALSE	FALSE	FALSE	TRUE	FALSE	FALSE	FALSE	FALSE	FALSE
ENSG00000131323	TRAF3	innate immune response, apoptotic process, regulation of apoptotic process, induction of apoptosis, signal transduction, regulation of proteolysis, Toll signaling pathway, tumor necrosis factor-mediated signaling pathway, toll-like receptor signaling pathway, negative regulation of NF-kappaB transcription factor activity, negative regulation of type I interferon production, regulation of defense …	FALSE	FALSE	FALSE	FALSE	FALSE	FALSE	FALSE	FALSE	FALSE	FALSE	FALSE	FALSE
ENSG00000131368	MRPS25	translation, cytoplasm, mitochondrion, mitochondrial small ribosomal subunit, structural constituent of ribosome, ribosome	FALSE	FALSE	FALSE	FALSE	FALSE	FALSE	FALSE	FALSE	FALSE	FALSE	FALSE	FALSE
ENSG00000131446	MGAT1	carbohydrate metabolic process, in utero embryonic development, protein glycosylation, cellular protein metabolic process, UDP-N-acetylglucosamine catabolic process, protein N-linked glycosylation via asparagine, post-translational protein modification, integral to membrane, Golgi membrane, metal ion binding, acetylglucosaminyltransferase activity, alpha-1,3-mannosylglycoprotein 2-beta-N-acetylgl…	TRUE	FALSE	FALSE	FALSE	FALSE	FALSE	FALSE	FALSE	FALSE	FALSE	FALSE	FALSE
ENSG00000131467	PSME3	proteasome activator complex, apoptotic process, regulation of apoptotic process, small molecule metabolic process, protein polyubiquitination, antigen processing and presentation of peptide antigen via MHC class I, mitotic cell cycle, viral reproduction, cell cycle checkpoint, S phase of mitotic cell cycle, M/G1 transition of mitotic cell cycle, antigen processing and presentation of exogenous p…	FALSE	FALSE	FALSE	FALSE	FALSE	FALSE	FALSE	FALSE	FALSE	FALSE	FALSE	FALSE
ENSG00000131495	NDUFA2	small molecule metabolic process, respiratory electron transport chain, mitochondrial electron transport, NADH to ubiquinone, mitochondrial inner membrane, mitochondrial respiratory chain complex I, mitochondrial membrane, mitochondrion, NADH dehydrogenase (ubiquinone) activity	TRUE	FALSE	FALSE	FALSE	FALSE	FALSE	FALSE	FALSE	FALSE	FALSE	FALSE	FALSE
ENSG00000131748	STARD3	lipid metabolic process, cholesterol metabolic process, progesterone biosynthetic process, mitochondrial transport, steroid metabolic process, integral to membrane, cytoplasm, late endosome membrane, cholesterol binding, cholesterol transporter activity, steroid biosynthetic process	FALSE	FALSE	FALSE	FALSE	FALSE	FALSE	TRUE	FALSE	FALSE	FALSE	FALSE	FALSE
ENSG00000131944	C19orf40	DNA repair, nucleus, intracellular membrane-bounded organelle, nucleoplasm, Fanconi anaemia nuclear complex, DNA binding, protein binding, chromatin binding	TRUE	FALSE	FALSE	FALSE	FALSE	FALSE	FALSE	FALSE	FALSE	FALSE	FALSE	FALSE
ENSG00000131979	GCH1	small molecule metabolic process, induction of apoptosis, protein homooligomerization, response to lipopolysaccharide, negative regulation of blood pressure, regulation of blood pressure, response to tumor necrosis factor, regulation of nitric-oxide synthase activity, protein heterooligomerization, nitric oxide biosynthetic process, vasodilation, dopamine biosynthetic process, response to interfe…	TRUE	FALSE	FALSE	FALSE	FALSE	FALSE	FALSE	FALSE	FALSE	FALSE	FALSE	FALSE
ENSG00000132122	SPATA6	cell differentiation, multicellular organismal development, spermatogenesis, extracellular region	FALSE	FALSE	FALSE	FALSE	FALSE	FALSE	FALSE	FALSE	FALSE	FALSE	FALSE	FALSE
ENSG00000132256	TRIM5	protein ubiquitination, defense response to virus, virus-host interaction, protein trimerization, nucleus, cytoplasm, intracellular, cytoplasmic mRNA processing body, Golgi apparatus, protein homodimerization activity, zinc ion binding, protein binding, ligase activity, identical protein binding	TRUE	FALSE	FALSE	FALSE	FALSE	FALSE	FALSE	FALSE	FALSE	FALSE	FALSE	FALSE
ENSG00000132274	TRIM22	transcription, DNA-dependent, protein ubiquitination, response to virus, immune response, regulation of transcription, DNA-dependent, defense response to virus, virus-host interaction, protein trimerization, nucleus, cytoplasm, intracellular, intracellular membrane-bounded organelle, Golgi apparatus, nuclear speck, Cajal body, sequence-specific DNA binding transcription factor activity, zinc ion …	TRUE	FALSE	FALSE	FALSE	FALSE	FALSE	FALSE	FALSE	FALSE	FALSE	FALSE	FALSE
ENSG00000132286	FXC1	cell-matrix adhesion, cellular protein metabolic process, protein targeting to mitochondrion, protein import into mitochondrial inner membrane, mitochondrial inner membrane, mitochondrial intermembrane space, mitochondrial intermembrane space protein transporter complex, metal ion binding	TRUE	FALSE	FALSE	FALSE	FALSE	FALSE	FALSE	FALSE	FALSE	FALSE	FALSE	FALSE
ENSG00000132294	EFR3A	plasma membrane, intracellular, binding	TRUE	FALSE	FALSE	FALSE	FALSE	FALSE	FALSE	FALSE	FALSE	FALSE	FALSE	FALSE
ENSG00000132466	ANKRD17	virus-host interaction, negative regulation of smooth muscle cell differentiation, blood vessel maturation, nucleus, cytoplasm, RNA binding, protein binding	FALSE	FALSE	FALSE	FALSE	FALSE	FALSE	FALSE	FALSE	FALSE	FALSE	FALSE	FALSE
ENSG00000132530	XAF1	protein binding, zinc ion binding, apoptotic process, cytokine-mediated signaling pathway, type I interferon-mediated signaling pathway, nucleus, cytosol, mitochondrion	FALSE	FALSE	FALSE	FALSE	FALSE	FALSE	FALSE	FALSE	FALSE	FALSE	FALSE	FALSE
ENSG00000132670	PTPRA	axon guidance, protein phosphorylation, protein dephosphorylation, insulin receptor signaling pathway, peptidyl-tyrosine dephosphorylation, dephosphorylation, plasma membrane, integral to plasma membrane, protein tyrosine phosphatase activity, phosphatase activity, transmembrane receptor protein tyrosine phosphatase activity	TRUE	FALSE	FALSE	FALSE	FALSE	FALSE	FALSE	FALSE	FALSE	FALSE	FALSE	FALSE
ENSG00000132842	AP3B1	intracellular protein transport, vesicle-mediated transport, endocytosis, blood coagulation, melanosome organization, protein targeting to lysosome, antigen processing and presentation, exogenous lipid antigen via MHC class Ib, positive regulation of NK T cell differentiation, anterograde axon cargo transport, anterograde synaptic vesicle transport, antigen processing and presentation, Golgi appa…	TRUE	FALSE	FALSE	FALSE	FALSE	FALSE	FALSE	FALSE	FALSE	FALSE	FALSE	FALSE
ENSG00000133104	SPG20	regulation of mitochondrial membrane potential, cell death, cytoplasm, mitochondrial outer membrane, ubiquitin protein ligase binding, adipose tissue development, neuromuscular process, cytokinesis, negative regulation of BMP signaling pathway, lipid particle organization, negative regulation of collateral sprouting in absence of injury, lipid particle, synapse, protein binding	TRUE	FALSE	FALSE	FALSE	FALSE	FALSE	FALSE	FALSE	FALSE	FALSE	FALSE	FALSE
ENSG00000133106	EPSTI1		TRUE	FALSE	FALSE	FALSE	FALSE	FALSE	FALSE	FALSE	FALSE	FALSE	FALSE	FALSE
ENSG00000133112	TPT1	stem cell maintenance, negative regulation of ectoderm development, nucleoplasm, transcription factor binding, , regulation of apoptotic process, negative regulation of apoptotic process, response to virus, calcium ion transport, cellular calcium ion homeostasis, cytoplasm, extracellular space, multivesicular body, tubulin complex, calcium ion binding	FALSE	FALSE	FALSE	FALSE	FALSE	FALSE	FALSE	FALSE	FALSE	FALSE	FALSE	FALSE
ENSG00000133195	SLC39A11	transmembrane transport, metal ion transport, zinc ion transport, integral to membrane, membrane, metal ion transmembrane transporter activity	TRUE	FALSE	FALSE	FALSE	FALSE	FALSE	FALSE	FALSE	FALSE	FALSE	FALSE	FALSE
ENSG00000133247	SUV420H2	transcription, DNA-dependent, regulation of transcription, DNA-dependent, histone H4-K20 trimethylation, histone methylation, histone H4-K20 methylation, condensed nuclear chromosome, centromeric region, protein binding, histone methyltransferase activity (H4-K20 specific)	TRUE	FALSE	FALSE	FALSE	FALSE	FALSE	TRUE	FALSE	FALSE	FALSE	FALSE	FALSE
ENSG00000133256	PDE6B	visual perception, signal transduction, retina development in camera-type eye, blood coagulation, detection of light stimulus, cytosolic calcium ion homeostasis, phototransduction, visible light, GMP metabolic process, cytosol, membrane, protein binding, metal ion binding, catalytic activity, 3',5'-cyclic-nucleotide phosphodiesterase activity, 3',5'-cyclic-GMP phosphodiesterase activity	FALSE	FALSE	FALSE	FALSE	FALSE	FALSE	FALSE	FALSE	FALSE	FALSE	FALSE	FALSE
ENSG00000133275	CSNK1G2	small molecule metabolic process, signal transduction, Wnt receptor signaling pathway, protein phosphorylation, phospholipid metabolic process, protein autophosphorylation, sphingolipid metabolic process, sphingolipid biosynthetic process, cytoplasm, cytosol, ATP binding, protein serine/threonine kinase activity, magnesium ion binding, protein kinase activity, protein tyrosine kinase activity, pe…	FALSE	FALSE	FALSE	FALSE	FALSE	FALSE	FALSE	FALSE	FALSE	FALSE	FALSE	FALSE
ENSG00000133627	ACTR3B	regulation of actin filament polymerization, cytoplasm, cell projection, cytoskeleton, ATP binding, actin binding	TRUE	FALSE	FALSE	FALSE	FALSE	FALSE	FALSE	FALSE	FALSE	FALSE	FALSE	FALSE
ENSG00000133657	ATP13A3	metabolic process, cation transport, integral to membrane, membrane, nucleotide binding, ATP binding, metal ion binding, catalytic activity, ATPase activity, ATPase activity, coupled to transmembrane movement of ions, phosphorylative mechanism, hydrolase activity, acting on acid anhydrides, catalyzing transmembrane movement of substances	TRUE	FALSE	FALSE	FALSE	FALSE	FALSE	FALSE	FALSE	FALSE	FALSE	FALSE	FALSE
ENSG00000133835	HSD17B4	cellular lipid metabolic process, small molecule metabolic process, metabolic process, bile acid metabolic process, fatty acid beta-oxidation, estrogen metabolic process, androgen metabolic process, bile acid biosynthetic process, very long-chain fatty acid metabolic process, Sertoli cell development, fatty acid beta-oxidation using acyl-CoA oxidase, unsaturated fatty acid metabolic process, alph…	TRUE	FALSE	FALSE	FALSE	FALSE	FALSE	FALSE	FALSE	FALSE	FALSE	FALSE	FALSE
ENSG00000133985	TTC9	protein binding	TRUE	FALSE	FALSE	FALSE	FALSE	FALSE	FALSE	FALSE	FALSE	FALSE	FALSE	FALSE
ENSG00000134014	ELP3	positive regulation of cell migration, regulation of transcription from RNA polymerase II promoter, transcription elongation from RNA polymerase II promoter, cytoplasm, nucleolus, transcription elongation factor complex, Elongator holoenzyme complex, DNA-directed RNA polymerase II, holoenzyme, DNA binding, protein binding, metal ion binding, catalytic activity, N-acetyltransferase activity, iron-…	TRUE	FALSE	FALSE	FALSE	FALSE	FALSE	FALSE	FALSE	FALSE	FALSE	FALSE	FALSE
ENSG00000134046	MBD2	transcription, DNA-dependent, negative regulation of transcription from RNA polymerase II promoter, negative regulation of transcription, DNA-dependent, cellular protein complex assembly, regulation of cell proliferation, maternal behavior, positive regulation of Wnt receptor signaling pathway, nucleus, cytoplasm, heterochromatin, histone deacetylase complex, chromatin, DNA binding, protein bindi…	TRUE	FALSE	FALSE	FALSE	FALSE	FALSE	FALSE	FALSE	FALSE	FALSE	FALSE	FALSE
ENSG00000134077	THUMPD3	RNA binding, methyltransferase activity	TRUE	FALSE	FALSE	FALSE	FALSE	FALSE	FALSE	FALSE	FALSE	FALSE	FALSE	FALSE
ENSG00000134152	KATNBL1	nucleolus	TRUE	FALSE	FALSE	FALSE	FALSE	FALSE	FALSE	FALSE	FALSE	FALSE	FALSE	FALSE
ENSG00000134287	ARF3	small GTPase mediated signal transduction, G-protein coupled receptor signaling pathway, intracellular protein transport, nucleus, cytoplasm, intracellular, Golgi apparatus, GTP binding, signal transducer activity, guanyl nucleotide binding, GTPase activity, G-protein beta/gamma-subunit complex binding, small molecule metabolic process, protein transport, vesicle-mediated transport, phospholipid …	TRUE	FALSE	FALSE	FALSE	FALSE	FALSE	FALSE	FALSE	FALSE	FALSE	FALSE	FALSE
ENSG00000134321	RSAD2	catalytic activity, iron-sulfur cluster binding, innate immune response, response to virus, negative regulation of viral genome replication, defense response to virus, ossification, CD4-positive, alpha-beta T cell differentiation, positive regulation of T-helper 2 cell cytokine production, regulation of ossification, virus-host interaction, negative regulation of protein secretion, positive regul…	FALSE	FALSE	FALSE	FALSE	FALSE	FALSE	FALSE	FALSE	FALSE	FALSE	FALSE	FALSE
ENSG00000134326	CMPK2	cellular response to lipopolysaccharide, pyrimidine nucleotide biosynthetic process, dUDP biosynthetic process, dTDP biosynthetic process, nucleus, mitochondrion, ATP binding, cytidylate kinase activity, UMP kinase activity, uridylate kinase activity, thymidylate kinase activity	FALSE	FALSE	FALSE	FALSE	FALSE	FALSE	FALSE	FALSE	FALSE	FALSE	FALSE	FALSE
ENSG00000134330	IAH1	hydrolase activity, lipid metabolic process, hydrolase activity, acting on ester bonds, lipid catabolic process	TRUE	FALSE	FALSE	FALSE	FALSE	FALSE	FALSE	FALSE	FALSE	FALSE	FALSE	FALSE
ENSG00000134333	LDHA	oxidation-reduction process, small molecule metabolic process, carbohydrate metabolic process, glycolysis, cellular response to extracellular stimulus, cellular carbohydrate metabolic process, pyruvate metabolic process, cytoplasm, cytosol, mitochondrion, flagellum, nucleotide binding, oxidoreductase activity, catalytic activity, L-lactate dehydrogenase activity, oxidoreductase activity, acting o…	FALSE	FALSE	FALSE	FALSE	FALSE	FALSE	FALSE	FALSE	FALSE	FALSE	FALSE	FALSE
ENSG00000134352	IL6ST	positive regulation of cell proliferation, glycogen metabolic process, response to cytokine stimulus, cytokine-mediated signaling pathway, positive regulation of smooth muscle cell migration, response to nutrient, positive regulation vascular endothelial growth factor production, JAK-STAT cascade, positive regulation of osteoblast differentiation, triglyceride mobilization, reduction of cytosolic…	TRUE	FALSE	FALSE	FALSE	FALSE	FALSE	FALSE	FALSE	FALSE	FALSE	FALSE	FALSE
ENSG00000134440	NARS	gene expression, tRNA aminoacylation for protein translation, asparaginyl-tRNA aminoacylation, cytoplasm, cytosol, mitochondrion, nucleotide binding, ATP binding, nucleic acid binding, aminoacyl-tRNA ligase activity, asparagine-tRNA ligase activity	TRUE	FALSE	FALSE	FALSE	FALSE	FALSE	FALSE	FALSE	FALSE	FALSE	FALSE	FALSE
ENSG00000134744	ZCCHC11	negative regulation of NF-kappaB transcription factor activity, cytokine production, regulation of lipopolysaccharide-mediated signaling pathway, nucleus, cytoplasm, stem cell maintenance, miRNA metabolic process, pre-miRNA processing, miRNA catabolic process, RNA 3'-end processing, positive regulation of interleukin-6 production, interleukin-6-mediated signaling pathway, nucleolus, zinc ion bind…	TRUE	FALSE	FALSE	FALSE	FALSE	FALSE	FALSE	FALSE	FALSE	FALSE	FALSE	FALSE
ENSG00000134809	TIMM10	cellular protein metabolic process, sensory perception of sound, protein targeting to mitochondrion, protein import into mitochondrial inner membrane, chaperone-mediated protein transport, mitochondrion, mitochondrial inner membrane, mitochondrial intermembrane space, mitochondrial intermembrane space protein transporter complex, mitochondrial inner membrane presequence translocase complex, prote…	TRUE	FALSE	FALSE	FALSE	FALSE	FALSE	FALSE	FALSE	FALSE	FALSE	FALSE	FALSE
ENSG00000134851	TMEM165	membrane, integral to membrane, Golgi apparatus	FALSE	FALSE	FALSE	FALSE	FALSE	FALSE	FALSE	FALSE	FALSE	FALSE	FALSE	FALSE
ENSG00000134852	CLOCK	positive regulation of transcription from RNA polymerase II promoter, regulation of transcription, DNA-dependent, signal transduction, regulation of transcription from RNA polymerase II promoter, DNA damage checkpoint, circadian regulation of gene expression, circadian rhythm, cellular response to ionizing radiation, entrainment of circadian clock, photoperiodism, nucleus, transcription factor co…	FALSE	FALSE	FALSE	FALSE	FALSE	FALSE	FALSE	FALSE	FALSE	FALSE	FALSE	FALSE
ENSG00000134900	TPP2	proteolysis, protein polyubiquitination, antigen processing and presentation of peptide antigen via MHC class I, nucleus, cytoplasm, cytosol, serine-type endopeptidase activity, aminopeptidase activity, peptide binding, endopeptidase activity, tripeptidyl-peptidase activity	TRUE	FALSE	FALSE	FALSE	FALSE	FALSE	FALSE	FALSE	FALSE	FALSE	FALSE	FALSE
ENSG00000134955	SLC37A2	transmembrane transport, carbohydrate transport, integral to membrane, transporter activity	TRUE	FALSE	FALSE	FALSE	FALSE	FALSE	FALSE	FALSE	FALSE	FALSE	FALSE	FALSE
ENSG00000135045	C9orf40		TRUE	FALSE	FALSE	FALSE	FALSE	FALSE	FALSE	FALSE	FALSE	FALSE	FALSE	FALSE
ENSG00000135116	HRK	apoptotic process, induction of apoptosis, positive regulation of apoptotic process, positive regulation of neuron apoptotic process, positive regulation of protein homooligomerization, positive regulation of release of cytochrome c from mitochondria, cellular response to potassium ion starvation, integral to membrane, mitochondrion, protein binding	TRUE	FALSE	FALSE	FALSE	FALSE	FALSE	FALSE	FALSE	FALSE	FALSE	FALSE	FALSE
ENSG00000135124	P2RX4	regulation of apoptotic process, ion transport, protein homooligomerization, signal transduction, transport, calcium ion transport, regulation of excitatory postsynaptic membrane potential, response to stress, positive regulation of nitric oxide biosynthetic process, tissue homeostasis, positive regulation of calcium ion transport, regulation of blood pressure, sensory perception of pain, positiv…	TRUE	FALSE	FALSE	FALSE	FALSE	FALSE	FALSE	FALSE	FALSE	FALSE	FALSE	FALSE
ENSG00000135164	DMTF1	transcription, DNA-dependent, cell cycle, regulation of transcription, DNA-dependent, nucleus, cytoplasm, DNA binding, sequence-specific DNA binding transcription factor activity, chromatin binding	TRUE	FALSE	FALSE	FALSE	FALSE	FALSE	FALSE	FALSE	FALSE	FALSE	FALSE	FALSE
ENSG00000135245	HILPDA	positive regulation of cell proliferation, response to stress, positive regulation of cytokine production, positive regulation of lipid storage, autocrine signaling, integral to membrane, extracellular space, cell surface, secretory granule, lipid particle, receptor binding	FALSE	FALSE	FALSE	FALSE	FALSE	FALSE	FALSE	FALSE	FALSE	FALSE	FALSE	FALSE
ENSG00000135316	SYNCRIP	RNA splicing, RNA processing, mRNA splicing, via spliceosome, virus-host interaction, CRD-mediated mRNA stabilization, nucleus, cytoplasm, endoplasmic reticulum, nucleoplasm, ribonucleoprotein complex, histone pre-mRNA 3'end processing complex, catalytic step 2 spliceosome, CRD-mediated mRNA stability complex, nucleotide binding, RNA binding, protein binding, nucleic acid binding, poly(A) RNA bin…	FALSE	FALSE	FALSE	FALSE	FALSE	FALSE	FALSE	FALSE	FALSE	FALSE	FALSE	FALSE
ENSG00000135407	AVIL	cytoskeleton organization, cilium morphogenesis, nervous system development, response to stress, positive regulation of neuron projection development, actin filament capping, cytoplasm, axon, cell projection, neuron projection, actin cytoskeleton, actin binding, protein binding	TRUE	FALSE	FALSE	FALSE	FALSE	FALSE	FALSE	FALSE	FALSE	FALSE	FALSE	FALSE
ENSG00000135469	COQ10A	mitochondrial inner membrane	FALSE	FALSE	FALSE	FALSE	FALSE	FALSE	FALSE	FALSE	FALSE	FALSE	FALSE	FALSE
ENSG00000135486	HNRNPA1	gene expression, mRNA processing, RNA splicing, mRNA transport, mRNA splicing, via spliceosome, alternative mRNA splicing, via spliceosome, virus-host interaction, nuclear export, RNA export from nucleus, nuclear import, nucleus, cytoplasm, nucleolus, nucleoplasm, ribonucleoprotein complex, spliceosomal complex, intermediate filament cytoskeleton, catalytic step 2 spliceosome, nucleotide binding,…	FALSE	FALSE	FALSE	FALSE	FALSE	FALSE	TRUE	FALSE	FALSE	FALSE	FALSE	FALSE
ENSG00000135519	KCNH3	potassium ion transport, transmembrane transport, ion transport, regulation of transcription, DNA-dependent, signal transduction, synaptic transmission, two-component signal transduction system (phosphorelay), integral to membrane, plasma membrane, membrane, ion channel activity, protein binding, voltage-gated potassium channel activity, signal transducer activity, two-component sensor activity	TRUE	FALSE	FALSE	FALSE	FALSE	FALSE	FALSE	FALSE	FALSE	FALSE	FALSE	FALSE
ENSG00000135679	MDM2	protein ubiquitination, negative regulation of transcription from RNA polymerase II promoter, negative regulation of apoptotic process, negative regulation of transcription, DNA-dependent, positive regulation of cell proliferation, response to antibiotic, phosphatidylinositol-mediated signaling, cell cycle checkpoint, DNA damage response, signal transduction by p53 class mediator resulting in cel…	TRUE	FALSE	FALSE	FALSE	FALSE	FALSE	FALSE	FALSE	FALSE	FALSE	FALSE	FALSE
ENSG00000135924	DNAJB2	negative regulation of cell proliferation, negative regulation of cell growth, protein folding, ER-associated protein catabolic process, positive regulation of protein ubiquitination, positive regulation of proteasomal ubiquitin-dependent protein catabolic process, response to unfolded protein, negative regulation of inclusion body assembly, negative regulation of protein deubiquitination, protea…	FALSE	FALSE	FALSE	FALSE	FALSE	FALSE	FALSE	FALSE	FALSE	FALSE	FALSE	FALSE
ENSG00000135945	REV1	DNA repair, DNA replication, response to UV, error-prone translesion synthesis, nucleoplasm, protein binding, magnesium ion binding, nucleotidyltransferase activity, DNA-directed DNA polymerase activity, damaged DNA binding, deoxycytidyl transferase activity	TRUE	FALSE	FALSE	FALSE	FALSE	FALSE	FALSE	FALSE	FALSE	FALSE	FALSE	FALSE
ENSG00000135953	MFSD9	transmembrane transport, integral to membrane, plasma membrane, transporter activity, transmembrane transporter activity	TRUE	FALSE	FALSE	FALSE	FALSE	FALSE	FALSE	FALSE	FALSE	FALSE	FALSE	FALSE
ENSG00000136045	PWP1	transcription, DNA-dependent, nucleus, protein binding	TRUE	FALSE	FALSE	FALSE	FALSE	FALSE	FALSE	FALSE	FALSE	FALSE	FALSE	FALSE
ENSG00000136052	SLC41A2	transmembrane transport, cation transport, integral to membrane, plasma membrane, cation transmembrane transporter activity	TRUE	FALSE	FALSE	FALSE	FALSE	FALSE	FALSE	FALSE	FALSE	FALSE	FALSE	FALSE
ENSG00000136147	PHF11	transcription, DNA-dependent, regulation of transcription, DNA-dependent, nucleus, zinc ion binding, protein binding	TRUE	FALSE	FALSE	FALSE	FALSE	FALSE	FALSE	FALSE	FALSE	FALSE	FALSE	FALSE
ENSG00000136161	RCBTB2	protein binding, Ran guanyl-nucleotide exchange factor activity	FALSE	FALSE	FALSE	FALSE	FALSE	FALSE	FALSE	FALSE	FALSE	FALSE	FALSE	FALSE
ENSG00000136273	HUS1	DNA repair, cell cycle checkpoint, DNA replication, protein phosphorylation, regulation of protein phosphorylation, embryo development, response to DNA damage stimulus, response to UV, DNA damage checkpoint, double-strand break repair via homologous recombination, negative regulation of DNA replication, mitotic cell cycle G1/S transition checkpoint, cellular response to ionizing radiation, nucleu…	TRUE	FALSE	FALSE	FALSE	FALSE	FALSE	FALSE	FALSE	FALSE	FALSE	FALSE	FALSE
ENSG00000136280	CCM2	integrin-mediated signaling pathway, vasculogenesis, stress-activated MAPK cascade, endothelial tube morphogenesis, cytoplasm, protein binding, , multicellular organism growth, pericardium development, in utero embryonic development, inner ear development, venous blood vessel morphogenesis, endothelial cell development, cell-cell junction organization, blood vessel endothelial cell differentiatio…	TRUE	FALSE	FALSE	FALSE	FALSE	FALSE	FALSE	FALSE	FALSE	FALSE	FALSE	FALSE
ENSG00000136379	FAM108C1	proteolysis, hydrolase activity, serine-type peptidase activity	TRUE	FALSE	FALSE	FALSE	FALSE	FALSE	FALSE	FALSE	FALSE	FALSE	FALSE	FALSE
ENSG00000136514	RTP4	detection of chemical stimulus involved in sensory perception of bitter taste, protein targeting to membrane, integral to membrane, cytoplasm, protein binding	FALSE	FALSE	FALSE	FALSE	FALSE	FALSE	FALSE	FALSE	FALSE	FALSE	FALSE	FALSE
ENSG00000136527	TRA2B	regulation of alternative mRNA splicing, via spliceosome, mRNA splicing, via spliceosome, RNA splicing, via transesterification reactions, positive regulation of mRNA splicing, via spliceosome, nucleus, nucleotide binding, protein binding, nucleic acid binding, mRNA binding	FALSE	FALSE	FALSE	FALSE	FALSE	FALSE	FALSE	FALSE	FALSE	FALSE	FALSE	FALSE
ENSG00000136731	UGGT1	protein folding, protein glycosylation, cellular protein metabolic process, protein N-linked glycosylation via asparagine, 'de novo' posttranslational protein folding, post-translational protein modification, UDP-glucosylation, endoplasmic reticulum, endoplasmic reticulum lumen, endoplasmic reticulum-Golgi intermediate compartment, unfolded protein binding, UDP-glucose:glycoprotein glucosyltransf…	FALSE	FALSE	FALSE	FALSE	FALSE	FALSE	FALSE	FALSE	FALSE	FALSE	FALSE	FALSE
ENSG00000136738	STAM	signal transduction, cellular membrane organization, endosomal transport, intracellular protein transport, epidermal growth factor receptor signaling pathway, negative regulation of epidermal growth factor receptor signaling pathway, cytosol, intracellular, early endosome membrane, protein binding, SH3/SH2 adaptor activity	FALSE	FALSE	FALSE	FALSE	FALSE	FALSE	FALSE	FALSE	FALSE	FALSE	FALSE	FALSE
ENSG00000136770	DNAJC1	protein folding, regulation of translation, negative regulation of proteolysis, positive regulation of ATPase activity, regulation of protein secretion, integral to membrane, endoplasmic reticulum membrane, endoplasmic reticulum, nuclear membrane, DNA binding, protein binding, chaperone binding, unfolded protein binding, chromatin binding, heat shock protein binding, ATPase activator activity	TRUE	FALSE	FALSE	FALSE	FALSE	FALSE	FALSE	FALSE	FALSE	FALSE	FALSE	FALSE
ENSG00000136933	RABEPK	protein binding, vesicle docking involved in exocytosis, receptor-mediated endocytosis, plasma membrane, intracellular membrane-bounded organelle, endosome membrane, endosome	TRUE	FALSE	FALSE	FALSE	FALSE	FALSE	FALSE	FALSE	FALSE	FALSE	FALSE	FALSE
ENSG00000136986	DERL1	ER-associated protein catabolic process, endoplasmic reticulum unfolded protein response, establishment of protein localization, cellular response to unfolded protein, response to unfolded protein, intracellular transport of viral proteins in host cell, retrograde protein transport, ER to cytosol, integral to membrane, endoplasmic reticulum, integral to endoplasmic reticulum membrane, early endos…	FALSE	FALSE	FALSE	FALSE	FALSE	FALSE	FALSE	FALSE	FALSE	FALSE	FALSE	FALSE
ENSG00000137055	PLAA	inflammatory response, signal transduction, phospholipid metabolic process, protein binding, binding, phospholipase A2 activator activity	TRUE	FALSE	FALSE	FALSE	FALSE	FALSE	FALSE	FALSE	FALSE	FALSE	FALSE	FALSE
ENSG00000137073	UBAP2	protein binding	TRUE	FALSE	FALSE	FALSE	FALSE	FALSE	FALSE	FALSE	FALSE	FALSE	FALSE	FALSE
ENSG00000137094	DNAJB5	negative regulation of transcription from RNA polymerase II promoter, protein folding, response to unfolded protein, nucleus, cytosol, protein binding, unfolded protein binding, heat shock protein binding	TRUE	FALSE	FALSE	FALSE	FALSE	FALSE	FALSE	FALSE	FALSE	FALSE	FALSE	FALSE
ENSG00000137154	RPS6	translation, glucose homeostasis, viral reproduction, gene expression, RNA metabolic process, mRNA metabolic process, rRNA processing, positive regulation of apoptotic process, translational elongation, cellular protein metabolic process, insulin receptor signaling pathway, TOR signaling cascade, SRP-dependent cotranslational protein targeting to membrane, translational initiation, viral infectio…	FALSE	FALSE	FALSE	FALSE	FALSE	FALSE	FALSE	FALSE	FALSE	FALSE	TRUE	FALSE
ENSG00000137200	FTSJD2	methylation, nucleus, cytoplasm, nucleic acid binding, methyltransferase activity, 7-methylguanosine mRNA capping, mRNA methylation, protein binding, mRNA (nucleoside-2'-O-)-methyltransferase activity	FALSE	FALSE	FALSE	FALSE	FALSE	FALSE	FALSE	FALSE	FALSE	FALSE	FALSE	FALSE
ENSG00000137343	ATAT1	tubulin N-acetyltransferase activity	FALSE	FALSE	FALSE	FALSE	FALSE	FALSE	FALSE	FALSE	FALSE	FALSE	FALSE	FALSE
ENSG00000137413	TAF8	transcription, DNA-dependent, cell differentiation, positive regulation of transcription, DNA-dependent, regulation of fat cell differentiation, inner cell mass cell proliferation, maintenance of protein location in nucleus, nucleus, perinuclear region of cytoplasm, transcription factor TFIID complex, protein binding, protein heterodimerization activity	FALSE	FALSE	FALSE	FALSE	FALSE	FALSE	FALSE	FALSE	FALSE	FALSE	FALSE	FALSE
ENSG00000137486	ARRB1	protein ubiquitination, positive regulation of transcription from RNA polymerase II promoter, protein transport, cellular membrane organization, phototransduction, transcription from RNA polymerase II promoter, Notch signaling pathway, positive regulation of peptidyl-serine phosphorylation, positive regulation of protein binding, positive regulation of Rho protein signal transduction, platelet ac…	TRUE	FALSE	FALSE	FALSE	FALSE	FALSE	FALSE	FALSE	FALSE	FALSE	FALSE	FALSE
ENSG00000137494	ANKRD42	positive regulation of NF-kappaB transcription factor activity, positive regulation of cytokine production involved in inflammatory response, nucleus, protein binding, NF-kappaB binding, positive regulation of sequence-specific DNA binding transcription factor activity	FALSE	FALSE	FALSE	FALSE	FALSE	FALSE	FALSE	FALSE	FALSE	FALSE	FALSE	FALSE
ENSG00000137509	PRCP	proteolysis, blood coagulation, blood coagulation, intrinsic pathway, plasma membrane, lysosome, protein binding, carboxypeptidase activity, serine-type peptidase activity, serine-type carboxypeptidase activity	FALSE	FALSE	FALSE	FALSE	FALSE	FALSE	FALSE	FALSE	FALSE	FALSE	FALSE	FALSE
ENSG00000137628	DDX60	innate immune response, response to virus, defense response to virus, positive regulation of MDA-5 signaling pathway, positive regulation of RIG-I signaling pathway, cytoplasm, RNA binding, DNA binding, protein binding, ATP binding, nucleic acid binding, hydrolase activity, double-stranded DNA binding, double-stranded RNA binding, single-stranded RNA binding, ATP-dependent helicase activity, heli…	TRUE	FALSE	FALSE	FALSE	FALSE	FALSE	FALSE	FALSE	FALSE	FALSE	FALSE	FALSE
ENSG00000137944	CCBL2	small molecule metabolic process, cellular nitrogen compound metabolic process, cellular amino acid metabolic process, biosynthetic process, 2-oxoglutarate metabolic process, tryptophan catabolic process, kynurenine metabolic process, mitochondrion, protein homodimerization activity, pyridoxal phosphate binding, kynurenine-oxoglutarate transaminase activity, cysteine-S-conjugate beta-lyase activi…	TRUE	FALSE	FALSE	FALSE	FALSE	FALSE	FALSE	FALSE	FALSE	FALSE	FALSE	FALSE
ENSG00000137959	IFI44L	immune response, defense response to virus, cytoplasm	FALSE	FALSE	FALSE	FALSE	FALSE	FALSE	FALSE	FALSE	FALSE	FALSE	FALSE	FALSE
ENSG00000137965	IFI44	response to virus, cytoplasm	FALSE	FALSE	FALSE	FALSE	FALSE	FALSE	FALSE	FALSE	FALSE	FALSE	FALSE	FALSE
ENSG00000138035	PNPT1	protein homooligomerization, RNA processing, mitotic cell cycle arrest, mRNA catabolic process, cellular response to interferon-beta, cellular response to oxidative stress, mitochondrion morphogenesis, negative regulation of growth, protein homotrimerization, RNA polyadenylation, positive regulation of mRNA catabolic process, RNA catabolic process, regulation of cellular senescence, regulation of…	FALSE	FALSE	FALSE	FALSE	FALSE	FALSE	FALSE	FALSE	FALSE	FALSE	FALSE	FALSE
ENSG00000138297	TIMM23	intracellular protein transport, cellular protein metabolic process, protein targeting to mitochondrion, mitochondrion, mitochondrial inner membrane, integral to mitochondrial inner membrane, mitochondrial intermembrane space, mitochondrial inner membrane presequence translocase complex, protein binding, P-P-bond-hydrolysis-driven protein transmembrane transporter activity, integral to membrane	TRUE	FALSE	FALSE	FALSE	FALSE	FALSE	FALSE	FALSE	FALSE	FALSE	FALSE	FALSE
ENSG00000138381	ASNSD1	biological_process, glutamine metabolic process, asparagine biosynthetic process, cellular_component, molecular_function, asparagine synthase (glutamine-hydrolyzing) activity	TRUE	FALSE	FALSE	FALSE	FALSE	FALSE	FALSE	FALSE	FALSE	FALSE	FALSE	FALSE
ENSG00000138386	NAB1	negative regulation of transcription, DNA-dependent, myelination, regulation of epidermis development, endochondral ossification, Schwann cell differentiation, nucleus, transcription factor binding, transcription, DNA-dependent, regulation of transcription, DNA-dependent	FALSE	FALSE	FALSE	FALSE	FALSE	FALSE	FALSE	FALSE	FALSE	FALSE	FALSE	FALSE
ENSG00000138617	PARP16	NAD+ ADP-ribosyltransferase activity, integral to membrane, endoplasmic reticulum membrane, nuclear membrane, NAD(P)+-protein-arginine ADP-ribosyltransferase activity	TRUE	FALSE	FALSE	FALSE	FALSE	FALSE	FALSE	FALSE	FALSE	FALSE	FALSE	FALSE
ENSG00000138621	PPCDC	small molecule metabolic process, coenzyme A biosynthetic process, vitamin metabolic process, water-soluble vitamin metabolic process, pantothenate metabolic process, coenzyme biosynthetic process, cytosol, catalytic activity, phosphopantothenoylcysteine decarboxylase activity	TRUE	FALSE	FALSE	FALSE	FALSE	FALSE	FALSE	FALSE	FALSE	FALSE	FALSE	FALSE
ENSG00000138642	HERC6	cellular protein modification process, protein ubiquitination involved in ubiquitin-dependent protein catabolic process, nucleus, cytoplasm, cytosol, intracellular, ubiquitin-protein ligase activity	FALSE	FALSE	FALSE	FALSE	FALSE	FALSE	FALSE	FALSE	FALSE	FALSE	FALSE	FALSE
ENSG00000138646	HERC5	innate immune response, cellular protein modification process, protein ubiquitination involved in ubiquitin-dependent protein catabolic process, defense response to virus, cytokine-mediated signaling pathway, regulation of cyclin-dependent protein kinase activity, negative regulation of type I interferon production, regulation of defense response to virus, ISG15-protein conjugation, nucleus, cyto…	FALSE	FALSE	FALSE	FALSE	FALSE	FALSE	FALSE	FALSE	FALSE	FALSE	FALSE	FALSE
ENSG00000138674	SEC31A	protein transport, antigen processing and presentation of peptide antigen via MHC class I, cellular membrane organization, ER to Golgi vesicle-mediated transport, cellular protein metabolic process, response to calcium ion, endoplasmic reticulum unfolded protein response, protein N-linked glycosylation via asparagine, COPII vesicle coating, antigen processing and presentation of exogenous peptide…	FALSE	FALSE	FALSE	FALSE	FALSE	FALSE	FALSE	FALSE	FALSE	FALSE	FALSE	FALSE
ENSG00000138744	NAAA	biological_process, lipid metabolic process, cytoplasm, lysosome, molecular_function, hydrolase activity, hydrolase activity, acting on carbon-nitrogen (but not peptide) bonds, transcription factor binding	TRUE	FALSE	FALSE	FALSE	FALSE	FALSE	FALSE	FALSE	FALSE	FALSE	FALSE	FALSE
ENSG00000138760	SCARB2	cell adhesion, protein targeting to lysosome, membrane, integral to plasma membrane, lysosomal membrane, lysosomal lumen, enzyme binding, receptor activity, integral to membrane, lysosome	TRUE	FALSE	FALSE	FALSE	FALSE	FALSE	FALSE	FALSE	FALSE	FALSE	FALSE	FALSE
ENSG00000138801	PAPSS1	small molecule metabolic process, skeletal system development, sulfate assimilation, xenobiotic metabolic process, 3'-phosphoadenosine 5'-phosphosulfate metabolic process, 3'-phosphoadenosine 5'-phosphosulfate biosynthetic process, cytosol, ATP binding, nucleotidyltransferase activity, adenylylsulfate kinase activity, sulfate adenylyltransferase (ATP) activity	TRUE	FALSE	FALSE	FALSE	FALSE	FALSE	FALSE	FALSE	FALSE	FALSE	FALSE	FALSE
ENSG00000138942	RNF185	protein ubiquitination, autophagy, integral to membrane, mitochondrial outer membrane, zinc ion binding, protein binding, ligase activity	TRUE	FALSE	FALSE	FALSE	FALSE	FALSE	FALSE	FALSE	FALSE	FALSE	FALSE	FALSE
ENSG00000139154	AEBP2	regulation of transcription, DNA-dependent, intracellular, ESC/E(Z) complex, DNA binding, zinc ion binding, transcription corepressor activity, transcription, DNA-dependent, chromatin modification, nucleus	TRUE	FALSE	FALSE	FALSE	FALSE	FALSE	FALSE	FALSE	FALSE	FALSE	FALSE	FALSE
ENSG00000139160	METTL20	protein methylation, cytoplasm, protein methyltransferase activity	TRUE	FALSE	FALSE	FALSE	FALSE	FALSE	FALSE	FALSE	FALSE	FALSE	FALSE	FALSE
ENSG00000139182	CLSTN3	homophilic cell adhesion, integral to membrane, membrane, postsynaptic membrane, calcium ion binding, plasma membrane, endoplasmic reticulum membrane, Golgi membrane	TRUE	FALSE	FALSE	FALSE	FALSE	FALSE	FALSE	FALSE	FALSE	FALSE	FALSE	FALSE
ENSG00000139433	GLTP	glycolipid transport, cytoplasm, membrane, lipid binding, glycolipid transporter activity, glycolipid binding	TRUE	FALSE	FALSE	FALSE	FALSE	FALSE	FALSE	FALSE	FALSE	FALSE	FALSE	FALSE
ENSG00000139437	TCHP	apoptotic process, negative regulation of cell growth, cytoplasm, plasma membrane, mitochondrion, centrosome, keratin filament, apical cortex, protein binding	TRUE	FALSE	FALSE	FALSE	FALSE	FALSE	FALSE	FALSE	FALSE	FALSE	FALSE	FALSE
ENSG00000139625	MAP3K12	protein phosphorylation, JNK cascade, peptidyl-threonine phosphorylation, peptidyl-serine phosphorylation, protein autophosphorylation, intracellular protein kinase cascade, histone phosphorylation, cytoplasm, plasma membrane, cytosol, membrane, growth cone, axon part, protein homodimerization activity, protein binding, ATP binding, protein serine/threonine kinase activity, magnesium ion binding,…	TRUE	FALSE	FALSE	FALSE	FALSE	FALSE	FALSE	FALSE	FALSE	FALSE	FALSE	FALSE
ENSG00000139746	RBM26	nucleotide binding, nucleic acid binding, mRNA processing, negative regulation of phosphatase activity, RNA binding, zinc ion binding, protein binding, termination of G-protein coupled receptor signaling pathway	TRUE	FALSE	FALSE	FALSE	FALSE	FALSE	FALSE	FALSE	FALSE	FALSE	FALSE	FALSE
ENSG00000139977	NAA30	transferase activity, transferring acyl groups other than amino-acyl groups, N-acetyltransferase activity, cytoplasm, peptide alpha-N-acetyltransferase activity	TRUE	FALSE	FALSE	FALSE	FALSE	FALSE	FALSE	FALSE	FALSE	FALSE	FALSE	FALSE
ENSG00000140030	GPR65	apoptotic process, multicellular organismal development, G-protein coupled receptor signaling pathway, immune response, positive regulation of stress fiber assembly, actin cytoskeleton reorganization, response to acidity, positive regulation of cAMP biosynthetic process, activation of Rho GTPase activity, integral to membrane, plasma membrane, integral to plasma membrane, G-protein coupled recept…	TRUE	FALSE	FALSE	FALSE	FALSE	FALSE	FALSE	FALSE	FALSE	FALSE	FALSE	FALSE
ENSG00000140263	SORD	oxidation-reduction process, glucose metabolic process, sperm motility, sorbitol catabolic process, fructose biosynthetic process, L-xylitol catabolic process, L-xylitol metabolic process, sorbitol metabolic process, membrane, extracellular space, cilium, flagellum, mitochondrial membrane, mitochondrion, zinc ion binding, oxidoreductase activity, carbohydrate binding, transferase activity, transf…	FALSE	FALSE	FALSE	FALSE	FALSE	FALSE	FALSE	FALSE	FALSE	FALSE	FALSE	FALSE
ENSG00000140280	LYSMD2	cell wall macromolecule catabolic process	FALSE	FALSE	FALSE	FALSE	FALSE	FALSE	FALSE	FALSE	FALSE	FALSE	FALSE	FALSE
ENSG00000140450	ARRDC4	signal transduction	TRUE	FALSE	FALSE	FALSE	FALSE	FALSE	FALSE	FALSE	FALSE	FALSE	FALSE	FALSE
ENSG00000140463	BBS4	cilium assembly, nonmotile primary cilium assembly, spermatid development, microtubule cytoskeleton organization, neural tube closure, cilium morphogenesis, photoreceptor cell maintenance, cerebral cortex development, retinal rod cell development, fat cell differentiation, centrosome organization, dendrite development, intracellular transport, protein localization to organelle, hippocampus develo…	TRUE	FALSE	FALSE	FALSE	FALSE	FALSE	FALSE	FALSE	FALSE	FALSE	FALSE	FALSE
ENSG00000140525	FANCI	cell cycle, DNA repair, positive regulation of protein ubiquitination, nucleus, plasma membrane, nucleoplasm, DNA binding, protein binding	FALSE	FALSE	FALSE	FALSE	FALSE	FALSE	FALSE	FALSE	FALSE	FALSE	FALSE	FALSE
ENSG00000140650	PMM2	metabolic process, mannose biosynthetic process, cytoplasm, neuronal cell body, catalytic activity, phosphomannomutase activity, protein glycosylation, cellular protein metabolic process, GDP-mannose biosynthetic process, protein N-linked glycosylation via asparagine, dolichol-linked oligosaccharide biosynthetic process, post-translational protein modification, cytosol	TRUE	FALSE	FALSE	FALSE	FALSE	FALSE	FALSE	FALSE	FALSE	FALSE	FALSE	FALSE
ENSG00000140740	UQCRC2	proteolysis, small molecule metabolic process, respiratory electron transport chain, aerobic respiration, oxidative phosphorylation, mitochondrion, mitochondrial inner membrane, mitochondrial respiratory chain complex III, metalloendopeptidase activity, zinc ion binding, protein binding, metal ion binding, catalytic activity, protein complex binding	FALSE	FALSE	FALSE	FALSE	FALSE	FALSE	FALSE	FALSE	FALSE	FALSE	FALSE	FALSE
ENSG00000140859	KIFC3	visual perception, microtubule-based movement, microtubule-based process, Golgi organization, epithelial cell-cell adhesion, zonula adherens maintenance, Golgi apparatus, centrosome, microtubule, cytoplasmic vesicle membrane, kinesin complex, microtubule associated complex, zonula adherens, ATP binding, microtubule motor activity	TRUE	FALSE	FALSE	FALSE	FALSE	FALSE	FALSE	FALSE	FALSE	FALSE	FALSE	FALSE
ENSG00000140931	CMTM3	membrane, chemotaxis, integral to membrane, extracellular space, cytokine activity	TRUE	FALSE	FALSE	FALSE	FALSE	FALSE	TRUE	FALSE	FALSE	FALSE	FALSE	FALSE
ENSG00000140943	MBTPS1	proteolysis, lipid metabolic process, cholesterol metabolic process, endoplasmic reticulum unfolded protein response, regulation of transcription factor import into nucleus, activation of signaling protein activity involved in unfolded protein response, integral to membrane, endoplasmic reticulum membrane, Golgi membrane, Golgi apparatus, endoplasmic reticulum lumen, Golgi stack, serine-type endo…	TRUE	FALSE	FALSE	FALSE	FALSE	FALSE	FALSE	FALSE	FALSE	FALSE	FALSE	FALSE
ENSG00000140983	RHOT2	apoptotic process, small GTPase mediated signal transduction, regulation of small GTPase mediated signal transduction, protein transport, signal transduction, mitochondrion transport along microtubule, cellular homeostasis, GTP catabolic process, plasma membrane, cytosol, intracellular, membrane, mitochondrial outer membrane, integral to mitochondrial outer membrane, protein binding, calcium ion …	FALSE	FALSE	FALSE	FALSE	FALSE	FALSE	FALSE	FALSE	FALSE	FALSE	FALSE	FALSE
ENSG00000140990	NDUFB10	small molecule metabolic process, respiratory electron transport chain, mitochondrial electron transport, NADH to ubiquinone, mitochondrial inner membrane, mitochondrial respiratory chain complex I, mitochondrion, protein binding, NADH dehydrogenase (ubiquinone) activity	TRUE	FALSE	FALSE	FALSE	FALSE	FALSE	FALSE	FALSE	FALSE	FALSE	FALSE	FALSE
ENSG00000140995	DEF8	intracellular signal transduction, intracellular, zinc ion binding	FALSE	FALSE	FALSE	FALSE	FALSE	FALSE	FALSE	FALSE	FALSE	FALSE	FALSE	FALSE
ENSG00000141002	TCF25	transcription, DNA-dependent, negative regulation of transcription from RNA polymerase II promoter, heart development, nucleus, cytoplasm, mitochondrion, nucleolus, DNA binding, sequence-specific DNA binding transcription factor activity, protein binding	TRUE	FALSE	FALSE	FALSE	FALSE	FALSE	FALSE	FALSE	FALSE	FALSE	FALSE	FALSE
ENSG00000141030	COPS3	signal transduction, in utero embryonic development, response to light stimulus, cullin deneddylation, nucleus, cytoplasm, signalosome, protein binding	TRUE	FALSE	FALSE	FALSE	FALSE	FALSE	FALSE	FALSE	FALSE	FALSE	FALSE	FALSE
ENSG00000141068	KSR1	intracellular signal transduction, protein phosphorylation, intracellular, ATP binding, protein serine/threonine kinase activity, metal ion binding, protein kinase activity, protein tyrosine kinase activity, transferase activity, transferring phosphorus-containing groups, positive regulation of MAPK cascade, mitogen-activated protein kinase kinase binding, MAP-kinase scaffold activity, protein bi…	TRUE	FALSE	FALSE	FALSE	FALSE	FALSE	FALSE	FALSE	FALSE	FALSE	FALSE	FALSE
ENSG00000141252	VPS53	protein transport, endosome membrane, GARP complex, protein binding, , vesicle-mediated transport, membrane	TRUE	FALSE	FALSE	FALSE	FALSE	FALSE	FALSE	FALSE	FALSE	FALSE	FALSE	FALSE
ENSG00000141293	SKAP1	positive regulation of transcription, DNA-dependent, positive regulation of transcription from RNA polymerase II promoter, T cell receptor signaling pathway, nucleus, cytoplasm, plasma membrane, protein binding, phospholipid binding, antigen binding, SH2 domain binding, protein kinase binding, SH3/SH2 adaptor activity, protein complex binding	FALSE	FALSE	FALSE	FALSE	FALSE	FALSE	FALSE	FALSE	FALSE	FALSE	FALSE	FALSE
ENSG00000141376	BCAS3	protein binding, nucleus, cytoplasm, cell periphery	TRUE	FALSE	FALSE	FALSE	FALSE	FALSE	FALSE	FALSE	FALSE	FALSE	TRUE	FALSE
ENSG00000141378	PTRH2	apoptotic process, negative regulation of gene expression, negative regulation of anoikis, positive regulation of anoikis, cytosol, mitochondrion, protein binding, aminoacyl-tRNA hydrolase activity	FALSE	FALSE	FALSE	FALSE	FALSE	FALSE	FALSE	FALSE	FALSE	FALSE	FALSE	FALSE
ENSG00000141380	SS18	transcription, DNA-dependent, positive regulation of transcription from RNA polymerase II promoter, cell morphogenesis, response to drug, microtubule cytoskeleton organization, intracellular protein kinase cascade, ephrin receptor signaling pathway, cytoskeleton organization, nucleus, cytoplasmic microtubule, protein binding, ligand-dependent nuclear receptor transcription coactivator activity	TRUE	FALSE	FALSE	FALSE	FALSE	FALSE	FALSE	FALSE	FALSE	FALSE	FALSE	FALSE
ENSG00000141424	SLC39A6	transmembrane transport, cellular zinc ion homeostasis, metal ion transport, zinc ion transmembrane transport, zinc ion import, plasma membrane, membrane, endoplasmic reticulum, integral to plasma membrane, lamellipodium membrane, metal ion transmembrane transporter activity, zinc ion transmembrane transporter activity	TRUE	FALSE	FALSE	FALSE	FALSE	FALSE	FALSE	FALSE	FALSE	FALSE	FALSE	FALSE
ENSG00000141425	RPRD1A	dephosphorylation of RNA polymerase II C-terminal domain, DNA-directed RNA polymerase II, holoenzyme	FALSE	FALSE	FALSE	FALSE	FALSE	FALSE	FALSE	FALSE	FALSE	FALSE	FALSE	FALSE
ENSG00000141458	NPC1	membrane, hedgehog receptor activity, , autophagy, adult walking behavior, cholesterol metabolic process, response to drug, protein glycosylation, cholesterol homeostasis, endocytosis, negative regulation of macroautophagy, cholesterol transport, bile acid metabolic process, cholesterol efflux, cellular response to low-density lipoprotein particle stimulus, cellular response to steroid hormone st…	TRUE	FALSE	FALSE	FALSE	FALSE	FALSE	FALSE	FALSE	FALSE	FALSE	FALSE	FALSE
ENSG00000141524	TMC6	integral to membrane, endoplasmic reticulum membrane	TRUE	FALSE	FALSE	FALSE	FALSE	FALSE	FALSE	FALSE	FALSE	FALSE	FALSE	FALSE
ENSG00000141543	EIF4A3	gene expression, RNA metabolic process, mRNA metabolic process, nuclear-transcribed mRNA poly(A) tail shortening, nuclear-transcribed mRNA catabolic process, deadenylation-dependent decay, mRNA transport, rRNA processing, cytokine-mediated signaling pathway, positive regulation of translation, mRNA splicing, via spliceosome, negative regulation of translation, nuclear-transcribed mRNA catabolic p…	FALSE	FALSE	FALSE	FALSE	FALSE	FALSE	FALSE	FALSE	FALSE	FALSE	FALSE	FALSE
ENSG00000141570	CBX8	transcription, DNA-dependent, negative regulation of transcription from RNA polymerase II promoter, histone ubiquitination, nucleus, heterochromatin, nuclear chromatin, ubiquitin ligase complex, PcG protein complex, PRC1 complex, protein binding, ubiquitin-protein ligase activity, single-stranded RNA binding, methylated histone residue binding	FALSE	FALSE	FALSE	FALSE	FALSE	FALSE	FALSE	FALSE	FALSE	FALSE	FALSE	FALSE
ENSG00000141627	DYM	bone development, Golgi organization, nucleus, cytoplasm, plasma membrane, Golgi apparatus, protein binding, enzyme binding, binding	TRUE	FALSE	FALSE	FALSE	FALSE	FALSE	FALSE	FALSE	FALSE	FALSE	FALSE	FALSE
ENSG00000141664	ZCCHC2	cell communication, cytoplasm, zinc ion binding, protein binding, nucleic acid binding, phosphatidylinositol binding	TRUE	FALSE	FALSE	FALSE	FALSE	FALSE	FALSE	FALSE	FALSE	FALSE	FALSE	FALSE
ENSG00000141699	FAM134C	integral to membrane	FALSE	FALSE	FALSE	FALSE	FALSE	FALSE	FALSE	FALSE	FALSE	FALSE	TRUE	FALSE
ENSG00000141720	PIP4K2B	small molecule metabolic process, cell surface receptor signaling pathway, phospholipid metabolic process, phosphatidylinositol metabolic process, phosphatidylinositol biosynthetic process, nucleus, plasma membrane, cytosol, endoplasmic reticulum membrane, ATP binding, phosphatidylinositol phosphate kinase activity, 1-phosphatidylinositol-4-phosphate 5-kinase activity, receptor signaling protein …	TRUE	FALSE	FALSE	FALSE	FALSE	FALSE	FALSE	FALSE	FALSE	FALSE	FALSE	FALSE
ENSG00000141736	ERBB2	negative regulation of apoptotic process, heart development, positive regulation of cell proliferation, response to drug, tongue development, protein phosphorylation, peripheral nervous system development, response to progesterone stimulus, liver development, protein autophosphorylation, myelination, positive regulation of MAPK cascade, response to axon injury, transmembrane receptor protein tyro…	TRUE	FALSE	FALSE	FALSE	FALSE	FALSE	FALSE	FALSE	FALSE	FALSE	FALSE	FALSE
ENSG00000142227	EMP3	membrane, negative regulation of cell proliferation, cell growth, integral to membrane	TRUE	FALSE	FALSE	FALSE	FALSE	FALSE	FALSE	FALSE	FALSE	FALSE	FALSE	FALSE
ENSG00000142252	GEMIN7	gene expression, RNA metabolic process, mRNA splicing, via spliceosome, spliceosomal snRNP assembly, ncRNA metabolic process, cytoplasm, cytosol, nucleoplasm, spliceosomal complex, nuclear body, Cajal body, SMN complex, protein binding	FALSE	FALSE	FALSE	FALSE	FALSE	FALSE	FALSE	FALSE	FALSE	FALSE	FALSE	FALSE
ENSG00000142409	ZNF787	transcription, DNA-dependent, regulation of transcription, DNA-dependent, nucleus, intracellular, DNA binding, zinc ion binding	FALSE	FALSE	FALSE	FALSE	FALSE	FALSE	FALSE	FALSE	FALSE	FALSE	FALSE	FALSE
ENSG00000142444	C19orf52		FALSE	FALSE	FALSE	FALSE	FALSE	FALSE	FALSE	FALSE	FALSE	FALSE	FALSE	FALSE
ENSG00000142534	RPS11	translation, viral reproduction, gene expression, RNA metabolic process, mRNA metabolic process, translational elongation, cellular protein metabolic process, SRP-dependent cotranslational protein targeting to membrane, translational initiation, viral infectious cycle, nuclear-transcribed mRNA catabolic process, nonsense-mediated decay, translational termination, viral transcription, cytosol, int…	TRUE	FALSE	FALSE	FALSE	FALSE	FALSE	FALSE	FALSE	FALSE	FALSE	FALSE	FALSE
ENSG00000142541	RPL13A	translation, viral reproduction, gene expression, RNA metabolic process, mRNA metabolic process, translational elongation, cellular protein metabolic process, SRP-dependent cotranslational protein targeting to membrane, translational initiation, viral infectious cycle, nuclear-transcribed mRNA catabolic process, nonsense-mediated decay, translational termination, viral transcription, cytosol, rib…	FALSE	FALSE	FALSE	FALSE	FALSE	FALSE	FALSE	FALSE	FALSE	FALSE	FALSE	FALSE
ENSG00000142676	RPL11	translation, viral reproduction, gene expression, RNA metabolic process, mRNA metabolic process, rRNA processing, translational elongation, cellular protein metabolic process, ribosomal large subunit biogenesis, protein localization to nucleus, protein targeting, SRP-dependent cotranslational protein targeting to membrane, translational initiation, viral infectious cycle, nuclear-transcribed mRNA…	TRUE	FALSE	FALSE	FALSE	FALSE	FALSE	FALSE	FALSE	FALSE	FALSE	FALSE	FALSE
ENSG00000142687	KIAA0319L	integral to membrane, cytoplasmic vesicle part, protein binding	FALSE	FALSE	FALSE	FALSE	FALSE	FALSE	FALSE	FALSE	FALSE	FALSE	FALSE	FALSE
ENSG00000142961	MOB3C	metal ion binding	TRUE	FALSE	FALSE	FALSE	FALSE	FALSE	FALSE	FALSE	FALSE	FALSE	FALSE	FALSE
ENSG00000143321	HDGF	cell proliferation, negative regulation of transcription from RNA polymerase II promoter, signal transduction, endoplasmic reticulum unfolded protein response, activation of signaling protein activity involved in unfolded protein response, cytoplasm, extracellular space, nucleoplasm, transcriptional repressor complex, nucleotide binding, DNA binding, growth factor activity, heparin binding, RNA p…	FALSE	FALSE	FALSE	FALSE	FALSE	FALSE	FALSE	FALSE	FALSE	FALSE	FALSE	FALSE
ENSG00000143322	ABL2	axon guidance, cellular protein modification process, peptidyl-tyrosine phosphorylation, cell adhesion, signal transduction, protein phosphorylation, regulation of endocytosis, regulation of cell adhesion, positive regulation of neuron projection development, regulation of autophagy, actin filament bundle assembly, regulation of actin cytoskeleton reorganization, cellular response to retinoic aci…	TRUE	FALSE	FALSE	FALSE	FALSE	FALSE	FALSE	FALSE	FALSE	FALSE	FALSE	FALSE
ENSG00000143324	XPR1	G-protein coupled receptor signaling pathway, response to virus, integral to membrane, plasma membrane, integral to plasma membrane, G-protein coupled receptor activity, receptor activity, transmembrane signaling receptor activity	FALSE	FALSE	FALSE	FALSE	FALSE	FALSE	FALSE	FALSE	FALSE	FALSE	FALSE	FALSE
ENSG00000143353	LYPLAL1	biological_process, cellular_component, cytoplasm, hydrolase activity, lysophospholipase activity, metabolic process	TRUE	FALSE	FALSE	FALSE	FALSE	FALSE	FALSE	FALSE	FALSE	FALSE	FALSE	FALSE
ENSG00000143367	TUFT1	bone mineralization, odontogenesis, cytoplasm, extracellular region, structural constituent of tooth enamel, protein binding	FALSE	FALSE	FALSE	FALSE	FALSE	FALSE	FALSE	FALSE	FALSE	FALSE	FALSE	FALSE
ENSG00000143382	ADAMTSL4	apoptotic process, positive regulation of apoptotic process, extracellular matrix organization, cellular_component, extracellular matrix, interstitial matrix, metalloendopeptidase activity, protein binding, protease binding, peptidase activity	TRUE	FALSE	FALSE	FALSE	FALSE	FALSE	FALSE	FALSE	FALSE	FALSE	FALSE	FALSE
ENSG00000143412	ANXA9	cell-cell adhesion, cytosol, cell surface, protein homodimerization activity, phospholipid binding, calcium ion binding, calcium-dependent phospholipid binding, phosphatidylserine binding, acetylcholine receptor activity	TRUE	FALSE	FALSE	FALSE	FALSE	FALSE	FALSE	FALSE	FALSE	FALSE	FALSE	FALSE
ENSG00000143420	ENSA	mitosis, cell division, transport, G2/M transition of mitotic cell cycle, response to nutrient, cytoplasm, receptor binding, protein phosphatase type 2A regulator activity, ion channel inhibitor activity, protein phosphatase inhibitor activity, phosphatase inhibitor activity, protein phosphatase 2A binding, response to glucose stimulus	FALSE	FALSE	FALSE	FALSE	FALSE	FALSE	FALSE	FALSE	FALSE	FALSE	FALSE	FALSE
ENSG00000143452	HORMAD1	cell differentiation, synaptonemal complex assembly, spermatogenesis, meiosis, meiotic DNA double-strand break formation, oogenesis, blastocyst development, meiotic sister chromatid cohesion, meiotic recombination checkpoint, regulation of homologous chromosome segregation, nucleus, chromosome, intermediate filament cytoskeleton, protein binding	TRUE	FALSE	FALSE	FALSE	FALSE	FALSE	FALSE	FALSE	FALSE	FALSE	FALSE	FALSE
ENSG00000143486	EIF2D	intracellular protein transport, translational initiation, cytoplasm, RNA binding, protein binding, receptor activity, translation initiation factor activity	FALSE	FALSE	FALSE	FALSE	FALSE	FALSE	FALSE	FALSE	FALSE	FALSE	FALSE	FALSE
ENSG00000143543	JTB	apoptotic process, negative regulation of apoptotic process, mitosis, regulation of cell proliferation, positive regulation of protein kinase activity, cell cycle cytokinesis, integral to membrane, cytoplasm, mitochondrion, membrane, centrosome, spindle, integral to plasma membrane, midbody, protein kinase binding	FALSE	FALSE	FALSE	FALSE	FALSE	FALSE	FALSE	FALSE	FALSE	FALSE	FALSE	FALSE
ENSG00000143552	NUP210L	integral to membrane	TRUE	FALSE	FALSE	FALSE	FALSE	FALSE	FALSE	FALSE	FALSE	FALSE	FALSE	FALSE
ENSG00000143578	CREB3L4	regulation of transcription, DNA-dependent, DNA binding, sequence-specific DNA binding transcription factor activity, sequence-specific DNA binding, protein dimerization activity, transcription, DNA-dependent, spermatogenesis, positive regulation of transcription from RNA polymerase II promoter, response to unfolded protein, integral to membrane, nucleus, endoplasmic reticulum membrane, Golgi mem…	FALSE	FALSE	FALSE	FALSE	FALSE	FALSE	FALSE	FALSE	FALSE	FALSE	FALSE	FALSE
ENSG00000143702	CEP170	centrosome, spindle, microtubule, centriole, protein binding	TRUE	FALSE	FALSE	FALSE	FALSE	FALSE	FALSE	FALSE	FALSE	FALSE	FALSE	FALSE
ENSG00000143891	GALM	carbohydrate metabolic process, hexose metabolic process, cytoplasm, catalytic activity, carbohydrate binding, isomerase activity, aldose 1-epimerase activity	FALSE	FALSE	FALSE	FALSE	FALSE	FALSE	FALSE	FALSE	FALSE	FALSE	FALSE	FALSE
ENSG00000143924	EML4	mitosis, microtubule-based process, cytoplasm, microtubule, molecular_function, protein binding	TRUE	FALSE	FALSE	FALSE	FALSE	FALSE	TRUE	FALSE	FALSE	FALSE	FALSE	FALSE
ENSG00000143942	CHAC2	biological_process, cellular_component, molecular_function	TRUE	FALSE	FALSE	FALSE	FALSE	FALSE	FALSE	FALSE	FALSE	FALSE	FALSE	FALSE
ENSG00000143947	RPS27A	transcription, DNA-dependent, innate immune response, apoptotic process, negative regulation of transcription from RNA polymerase II promoter, regulation of apoptotic process, positive regulation of I-kappaB kinase/NF-kappaB cascade, positive regulation of transcription from RNA polymerase II promoter, protein polyubiquitination, translation, antigen processing and presentation of peptide antigen…	FALSE	FALSE	FALSE	FALSE	FALSE	FALSE	FALSE	FALSE	FALSE	FALSE	FALSE	FALSE
ENSG00000143994	ABHD1	carboxylesterase activity, biological_process, integral to membrane, molecular_function	FALSE	FALSE	FALSE	FALSE	FALSE	FALSE	FALSE	FALSE	FALSE	FALSE	FALSE	FALSE
ENSG00000144283	PKP4	cell adhesion, positive regulation of Rho GTPase activity, positive regulation of cell cycle cytokinesis, cytoplasm, spindle pole, midbody, internal side of plasma membrane, cell-cell junction, mitotic spindle, desmosome, spindle midzone, protein binding, binding	TRUE	FALSE	FALSE	FALSE	FALSE	FALSE	FALSE	FALSE	FALSE	FALSE	FALSE	FALSE
ENSG00000144395	CCDC150		FALSE	FALSE	FALSE	FALSE	FALSE	FALSE	FALSE	FALSE	FALSE	FALSE	FALSE	FALSE
ENSG00000144589	STK11IP	cytoplasm, , protein localization, protein kinase binding	FALSE	FALSE	FALSE	FALSE	FALSE	FALSE	FALSE	FALSE	FALSE	FALSE	FALSE	FALSE
ENSG00000144635	DYNC1LI1	mitosis, cell division, transport, virus-host interaction, regulation of centrosome cycle, positive regulation of mitotic cell cycle spindle assembly checkpoint, cytoplasm, plasma membrane, centrosome, microtubule, spindle pole, condensed chromosome kinetochore, cytoplasmic dynein complex, kinetochore, ATP binding, motor activity	TRUE	FALSE	FALSE	FALSE	FALSE	FALSE	FALSE	FALSE	FALSE	FALSE	FALSE	FALSE
ENSG00000144713	RPL32	translation, viral reproduction, gene expression, RNA metabolic process, mRNA metabolic process, translational elongation, cellular protein metabolic process, SRP-dependent cotranslational protein targeting to membrane, translational initiation, viral infectious cycle, nuclear-transcribed mRNA catabolic process, nonsense-mediated decay, translational termination, viral transcription, cytosol, int…	FALSE	FALSE	FALSE	FALSE	FALSE	FALSE	FALSE	FALSE	FALSE	FALSE	TRUE	FALSE
ENSG00000145214	DGKQ	protein kinase C-activating G-protein coupled receptor signaling pathway, intracellular signal transduction, G-protein coupled receptor signaling pathway, signal transduction, platelet activation, blood coagulation, cAMP-mediated signaling, response to ATP, protein kinase C signaling cascade, thrombin receptor signaling pathway, nucleus, cytoplasm, plasma membrane, cytosol, cytoskeleton, nuclear …	TRUE	FALSE	FALSE	FALSE	FALSE	FALSE	FALSE	FALSE	FALSE	FALSE	FALSE	FALSE
ENSG00000145216	FIP1L1	mRNA processing, nucleus, mRNA cleavage and polyadenylation specificity factor complex, RNA binding, protein binding, protein phosphorylation, transmembrane receptor protein tyrosine kinase signaling pathway, integral to membrane, ATP binding, protein kinase activity, protein tyrosine kinase activity, transferase activity, transferring phosphorus-containing groups, transmembrane receptor protein …	FALSE	FALSE	FALSE	FALSE	FALSE	FALSE	FALSE	FALSE	FALSE	FALSE	FALSE	FALSE
ENSG00000145244	CORIN	proteolysis, female pregnancy, regulation of blood pressure, peptide hormone processing, regulation of systemic arterial blood pressure by atrial natriuretic peptide, regulation of renal sodium excretion, integral to membrane, plasma membrane, extracellular region, membrane, cell surface, integral to plasma membrane, protein binding, serine-type endopeptidase activity, scavenger receptor activity…	TRUE	FALSE	FALSE	FALSE	FALSE	FALSE	FALSE	FALSE	FALSE	FALSE	FALSE	FALSE
ENSG00000145375	SPATA5	cell differentiation, multicellular organismal development, spermatogenesis, DNA repair, DNA recombination, cytoplasm, mitochondrion, nucleotide binding, ATP binding, nucleoside-triphosphatase activity, four-way junction helicase activity	FALSE	FALSE	FALSE	FALSE	FALSE	FALSE	FALSE	FALSE	FALSE	FALSE	FALSE	FALSE
ENSG00000145425	RPS3A	cell differentiation, induction of apoptosis, translation, viral reproduction, gene expression, RNA metabolic process, mRNA metabolic process, translational elongation, cellular protein metabolic process, SRP-dependent cotranslational protein targeting to membrane, translational initiation, viral infectious cycle, nuclear-transcribed mRNA catabolic process, nonsense-mediated decay, translational …	TRUE	FALSE	FALSE	FALSE	FALSE	FALSE	FALSE	FALSE	FALSE	FALSE	FALSE	FALSE
ENSG00000145555	MYO10	axon guidance, signal transduction, regulation of cell shape, positive regulation of cell-cell adhesion, cytoskeleton-dependent intracellular transport, regulation of filopodium assembly, cytoplasm, plasma membrane, cytosol, nucleolus, cytoskeleton, cell cortex, neuron projection, ruffle, neuronal cell body, lamellipodium, myosin complex, filopodium, filopodium tip, filopodium membrane, protein b…	TRUE	FALSE	FALSE	FALSE	FALSE	FALSE	FALSE	FALSE	FALSE	FALSE	FALSE	FALSE
ENSG00000145685	LHFPL2	integral to membrane	FALSE	FALSE	FALSE	FALSE	FALSE	FALSE	FALSE	FALSE	FALSE	FALSE	FALSE	FALSE
ENSG00000145725	PPIP5K2	inositol metabolic process, cytosol, ATP binding, kinase activity, acid phosphatase activity, inositol-1,3,4,5,6-pentakisphosphate kinase activity, inositol hexakisphosphate 5-kinase activity, diphosphoinositol-pentakisphosphate kinase activity, inositol hexakisphosphate 1-kinase activity, inositol hexakisphosphate 3-kinase activity	TRUE	FALSE	FALSE	FALSE	FALSE	FALSE	FALSE	FALSE	FALSE	FALSE	FALSE	FALSE
ENSG00000145730	PAM	heart development, response to copper ion, response to estradiol stimulus, response to hypoxia, response to drug, central nervous system development, response to glucocorticoid stimulus, response to pH, limb development, perikaryon, secretory granule, copper ion binding, peptidylglycine monooxygenase activity, peptidylamidoglycolate lyase activity, oxidation-reduction process, cellular protein mo…	TRUE	FALSE	FALSE	FALSE	FALSE	FALSE	FALSE	FALSE	FALSE	FALSE	FALSE	FALSE
ENSG00000145734	BDP1	regulation of transcription, DNA-dependent, gene expression, transcription from RNA polymerase III promoter, nucleoplasm, DNA binding, chromatin binding	TRUE	FALSE	FALSE	FALSE	FALSE	FALSE	FALSE	FALSE	FALSE	FALSE	FALSE	FALSE
ENSG00000145979	TBC1D7	positive regulation of protein ubiquitination, response to growth factor stimulus, negative regulation of TOR signaling cascade, activation of Rho GTPase activity, regulation of Rab GTPase activity, intracellular, cytoplasmic vesicle, cytoplasmic membrane-bounded vesicle, protein binding, Rab GTPase activator activity	TRUE	FALSE	FALSE	FALSE	FALSE	FALSE	FALSE	FALSE	FALSE	FALSE	FALSE	FALSE
ENSG00000146285	SCML4	transcription, DNA-dependent, regulation of transcription, DNA-dependent, nucleus, DNA binding, protein binding	TRUE	FALSE	FALSE	FALSE	FALSE	FALSE	FALSE	FALSE	FALSE	FALSE	FALSE	FALSE
ENSG00000146414	SHPRH	ATP binding, nucleic acid binding, helicase activity, protein ubiquitination, DNA repair, nucleosome assembly, nucleus, nucleosome, DNA binding, zinc ion binding, protein binding, ligase activity	TRUE	FALSE	FALSE	FALSE	FALSE	FALSE	FALSE	FALSE	FALSE	FALSE	FALSE	FALSE
ENSG00000146426	TIAM2	apoptotic process, small GTPase mediated signal transduction, regulation of small GTPase mediated signal transduction, regulation of Rho protein signal transduction, cellular lipid metabolic process, small molecule metabolic process, intracellular signal transduction, signal transduction, nerve growth factor receptor signaling pathway, positive regulation of GTPase activity, cytoplasm, cytosol, i…	TRUE	FALSE	FALSE	FALSE	FALSE	FALSE	FALSE	FALSE	FALSE	FALSE	FALSE	FALSE
ENSG00000146834	MEPCE	methyltransferase activity, RNA methylation, snRNA metabolic process, snRNA modification, RNA methyltransferase activity, S-adenosylmethionine-dependent methyltransferase activity	TRUE	FALSE	FALSE	FALSE	FALSE	FALSE	FALSE	FALSE	FALSE	FALSE	FALSE	FALSE
ENSG00000147465	STAR	cellular lipid metabolic process, small molecule metabolic process, cholesterol metabolic process, steroid biosynthetic process, regulation of steroid biosynthetic process, glucocorticoid metabolic process, steroid metabolic process, C21-steroid hormone biosynthetic process, cellular response to metal ion, cellular response to epinephrine stimulus, cellular response to luteinizing hormone stimulu…	FALSE	FALSE	FALSE	FALSE	FALSE	FALSE	FALSE	FALSE	FALSE	FALSE	FALSE	FALSE
ENSG00000147604	RPL7	cytosolic large ribosomal subunit, translation, viral reproduction, gene expression, RNA metabolic process, mRNA metabolic process, rRNA processing, translational elongation, cellular protein metabolic process, ribosomal large subunit biogenesis, SRP-dependent cotranslational protein targeting to membrane, translational initiation, viral infectious cycle, nuclear-transcribed mRNA catabolic proces…	FALSE	FALSE	FALSE	FALSE	FALSE	FALSE	FALSE	FALSE	FALSE	FALSE	FALSE	FALSE
ENSG00000147813	NAPRT1	NAD biosynthetic process, nicotinate nucleotide salvage, nucleus, cytoplasm, Golgi apparatus, nicotinate-nucleotide diphosphorylase (carboxylating) activity, nicotinate phosphoribosyltransferase activity, small molecule metabolic process, response to oxidative stress, NAD metabolic process, vitamin metabolic process, water-soluble vitamin metabolic process, nicotinamide metabolic process, cytosol	TRUE	FALSE	FALSE	FALSE	FALSE	FALSE	FALSE	FALSE	FALSE	FALSE	FALSE	FALSE
ENSG00000147852	VLDLR	negative regulation of transcription from RNA polymerase II promoter, heart development, cholesterol metabolic process, signal transduction, response to drug, cerebral cortex development, nervous system development, cellular response to hypoxia, cellular response to insulin stimulus, lipid transport, cellular response to lipopolysaccharide, response to nutrient, receptor-mediated endocytosis, mem…	TRUE	FALSE	FALSE	FALSE	FALSE	FALSE	FALSE	FALSE	FALSE	FALSE	FALSE	FALSE
ENSG00000147854	UHRF2	cell cycle, cell proliferation, ubiquitin-dependent protein catabolic process, protein ubiquitination, cell differentiation, regulation of cell cycle, protein autoubiquitination, positive regulation of cell cycle arrest, nucleus, nuclear heterochromatin, DNA binding, zinc ion binding, protein binding, ubiquitin-protein ligase activity, histone binding	FALSE	FALSE	FALSE	FALSE	FALSE	FALSE	FALSE	FALSE	FALSE	FALSE	FALSE	FALSE
ENSG00000148057	IDNK	ATP binding, shikimate kinase activity, biological_process, carbohydrate metabolic process, D-gluconate catabolic process, cytoplasm, molecular_function, kinase activity, gluconokinase activity	TRUE	FALSE	FALSE	FALSE	FALSE	FALSE	FALSE	FALSE	FALSE	FALSE	FALSE	FALSE
ENSG00000148110	HIATL1	transmembrane transport, integral to membrane, plasma membrane, transporter activity	TRUE	FALSE	FALSE	FALSE	FALSE	FALSE	FALSE	FALSE	FALSE	FALSE	FALSE	FALSE
ENSG00000148303	RPL7A	translation, ribosome biogenesis, viral reproduction, gene expression, RNA metabolic process, mRNA metabolic process, translational elongation, cellular protein metabolic process, SRP-dependent cotranslational protein targeting to membrane, translational initiation, viral infectious cycle, nuclear-transcribed mRNA catabolic process, nonsense-mediated decay, translational termination, viral transc…	FALSE	FALSE	FALSE	FALSE	FALSE	FALSE	FALSE	FALSE	FALSE	FALSE	FALSE	FALSE
ENSG00000148411	NACC2	protein homooligomerization, negative regulation of transcription, DNA-dependent, positive regulation of cell proliferation, nucleus, nuclear body, protein binding	TRUE	FALSE	FALSE	FALSE	FALSE	FALSE	FALSE	FALSE	FALSE	FALSE	FALSE	FALSE
ENSG00000148450	MSRB2	oxidation-reduction process, regulation of transcription, DNA-dependent, protein repair, mitochondrion, sequence-specific DNA binding transcription factor activity, zinc ion binding, peptide-methionine (R)-S-oxide reductase activity	TRUE	FALSE	FALSE	FALSE	FALSE	FALSE	FALSE	FALSE	FALSE	FALSE	FALSE	FALSE
ENSG00000148834	GSTO1	small molecule metabolic process, cellular response to arsenic-containing substance, xenobiotic catabolic process, L-ascorbic acid biosynthetic process, L-ascorbic acid metabolic process, xenobiotic metabolic process, cytoplasm, cytosol, protein binding, oxidoreductase activity, glutathione transferase activity, glutathione dehydrogenase (ascorbate) activity, methylarsonate reductase activity, tr…	TRUE	FALSE	FALSE	FALSE	FALSE	FALSE	FALSE	FALSE	FALSE	FALSE	FALSE	FALSE
ENSG00000148835	TAF5	regulation of transcription, DNA-dependent, DNA-dependent transcription, initiation, viral reproduction, gene expression, transcription initiation from RNA polymerase II promoter, transcription from RNA polymerase II promoter, chromatin modification, transcription elongation from RNA polymerase II promoter, histone acetylation, virus-host interaction, nucleus, intracellular membrane-bounded organ…	FALSE	FALSE	FALSE	FALSE	FALSE	FALSE	TRUE	FALSE	FALSE	FALSE	FALSE	FALSE
ENSG00000148842	CNNM2	magnesium ion transport, magnesium ion homeostasis, integral to membrane, basolateral plasma membrane	FALSE	FALSE	FALSE	FALSE	FALSE	FALSE	FALSE	FALSE	FALSE	FALSE	FALSE	FALSE
ENSG00000148985	PGAP2	signal transduction in response to DNA damage, nucleus, protein transport, GPI anchor biosynthetic process, integral to membrane, endoplasmic reticulum membrane, Golgi membrane, protein transporter activity, negative regulation of apoptotic process, response to DNA damage stimulus, protein binding	FALSE	FALSE	FALSE	FALSE	FALSE	FALSE	TRUE	FALSE	FALSE	FALSE	FALSE	FALSE
ENSG00000149179	C11orf49	nucleus	FALSE	FALSE	FALSE	FALSE	FALSE	FALSE	FALSE	FALSE	FALSE	FALSE	FALSE	FALSE
ENSG00000149182	ARFGAP2	protein transport, vesicle-mediated transport, regulation of ARF GTPase activity, cytoplasm, Golgi membrane, nucleolus, Golgi apparatus, zinc ion binding, ARF GTPase activator activity, , plasma membrane	FALSE	FALSE	FALSE	FALSE	FALSE	FALSE	FALSE	FALSE	FALSE	FALSE	FALSE	FALSE
ENSG00000149262	INTS4	snRNA processing, integrator complex, protein binding, binding	TRUE	FALSE	FALSE	FALSE	FALSE	FALSE	FALSE	FALSE	FALSE	FALSE	FALSE	FALSE
ENSG00000149311	ATM	negative regulation of apoptotic process, heart development, brain development, DNA repair, response to hypoxia, somitogenesis, positive regulation of neuron apoptotic process, intrinsic apoptotic signaling pathway in response to DNA damage response, protein autophosphorylation, response to ionizing radiation, DNA damage checkpoint, neuron apoptotic process, female gamete generation, lipoprotein …	TRUE	FALSE	FALSE	FALSE	FALSE	FALSE	FALSE	FALSE	FALSE	FALSE	FALSE	FALSE
ENSG00000149346	SLX4IP	protein binding	TRUE	FALSE	FALSE	FALSE	FALSE	FALSE	FALSE	FALSE	FALSE	FALSE	FALSE	FALSE
ENSG00000149489	ROM1	visual perception, cell adhesion, integral to membrane, integral to plasma membrane, photoreceptor outer segment membrane	FALSE	FALSE	FALSE	FALSE	FALSE	FALSE	FALSE	FALSE	FALSE	FALSE	FALSE	FALSE
ENSG00000149657	LSM14B	multicellular organismal development, regulation of translation, ribonucleoprotein complex	FALSE	FALSE	FALSE	FALSE	FALSE	FALSE	FALSE	FALSE	FALSE	FALSE	FALSE	FALSE
ENSG00000149761	NUDT22	hydrolase activity	TRUE	FALSE	FALSE	FALSE	FALSE	FALSE	FALSE	FALSE	FALSE	FALSE	FALSE	FALSE
ENSG00000149923	PPP4C	microtubule cytoskeleton organization, regulation of double-strand break repair via homologous recombination, NIK/NF-kappaB cascade, nucleus, cytoplasm, plasma membrane, centrosome, protein phosphatase 4 complex, protein binding, metal ion binding, hydrolase activity, protein serine/threonine phosphatase activity, NF-kappaB-inducing kinase activity, phosphoprotein phosphatase activity	FALSE	FALSE	FALSE	FALSE	FALSE	FALSE	FALSE	FALSE	FALSE	FALSE	FALSE	FALSE
ENSG00000150054	MPP7	establishment of cell polarity, positive regulation of signal transduction, tight junction assembly, positive regulation of protein complex assembly, protein localization to adherens junction, tight junction, adherens junction, MPP7-DLG1-LIN7 complex, protein binding, protein domain specific binding, protein heterodimerization activity, protein complex scaffold, signaling adaptor activity	TRUE	FALSE	FALSE	FALSE	FALSE	FALSE	FALSE	FALSE	FALSE	FALSE	FALSE	FALSE
ENSG00000150403	TMCO3	transmembrane transport, cation transport, integral to membrane, solute:hydrogen antiporter activity	TRUE	FALSE	FALSE	FALSE	FALSE	FALSE	FALSE	FALSE	FALSE	FALSE	FALSE	FALSE
ENSG00000150527	CTAGE5	positive regulation of catalytic activity, enzyme activator activity	TRUE	FALSE	FALSE	FALSE	FALSE	FALSE	FALSE	FALSE	FALSE	FALSE	FALSE	FALSE
ENSG00000150712	MTMR12	cytoplasm, phosphatase activity	TRUE	FALSE	FALSE	FALSE	FALSE	FALSE	FALSE	FALSE	FALSE	FALSE	FALSE	FALSE
ENSG00000150995	ITPR1	transmembrane transport, ion transport, small molecule metabolic process, signal transduction, response to hypoxia, calcium ion transport, platelet activation, release of sequestered calcium ion into cytosol, blood coagulation, epidermal growth factor receptor signaling pathway, activation of phospholipase C activity, fibroblast growth factor receptor signaling pathway, nerve growth factor recept…	TRUE	FALSE	FALSE	FALSE	FALSE	FALSE	FALSE	FALSE	FALSE	FALSE	FALSE	FALSE
ENSG00000151151	IPMK	neural tube formation, inositol phosphate biosynthetic process, nucleus, ATP binding, inositol-1,4,5-trisphosphate 3-kinase activity, inositol-1,4,5-trisphosphate 6-kinase activity, inositol tetrakisphosphate 3-kinase activity	TRUE	FALSE	FALSE	FALSE	FALSE	FALSE	FALSE	FALSE	FALSE	FALSE	FALSE	FALSE
ENSG00000151348	EXT2	cell differentiation, small molecule metabolic process, signal transduction, carbohydrate metabolic process, protein glycosylation, mesoderm formation, ossification, glycosaminoglycan biosynthetic process, glycosaminoglycan metabolic process, heparan sulfate proteoglycan biosynthetic process, heparan sulfate proteoglycan biosynthetic process, polysaccharide chain biosynthetic process, cellular po…	TRUE	FALSE	FALSE	FALSE	FALSE	FALSE	FALSE	FALSE	FALSE	FALSE	FALSE	FALSE
ENSG00000151470	C4orf33		TRUE	FALSE	FALSE	FALSE	FALSE	FALSE	FALSE	FALSE	FALSE	FALSE	FALSE	FALSE
ENSG00000151665	PIGF	cellular protein metabolic process, GPI anchor biosynthetic process, post-translational protein modification, C-terminal protein lipidation, preassembly of GPI anchor in ER membrane, integral to membrane, endoplasmic reticulum membrane, ethanolaminephosphotransferase activity	FALSE	FALSE	FALSE	FALSE	FALSE	FALSE	FALSE	FALSE	FALSE	FALSE	FALSE	FALSE
ENSG00000151692	RNF144A	protein ubiquitination, integral to membrane, Golgi apparatus, zinc ion binding, protein binding, ligase activity	FALSE	FALSE	FALSE	FALSE	FALSE	FALSE	FALSE	FALSE	FALSE	FALSE	FALSE	FALSE
ENSG00000151694	ADAM17	proteolysis, positive regulation of cellular component movement, positive regulation of cell proliferation, cell adhesion, response to hypoxia, response to lipopolysaccharide, response to drug, Notch signaling pathway, positive regulation of cell migration, B cell differentiation, T cell differentiation in thymus, positive regulation of cell growth, spleen development, JAK-STAT cascade involved i…	TRUE	FALSE	FALSE	FALSE	FALSE	FALSE	FALSE	FALSE	FALSE	FALSE	FALSE	FALSE
ENSG00000152042	NBPF11	cytoplasm	TRUE	FALSE	FALSE	FALSE	FALSE	FALSE	FALSE	FALSE	FALSE	FALSE	FALSE	FALSE
ENSG00000152056	AP1S3	protein transport, transport, cellular membrane organization, viral reproduction, intracellular protein transport, endocytosis, post-Golgi vesicle-mediated transport, antigen processing and presentation of exogenous peptide antigen via MHC class II, regulation of defense response to virus by virus, cytosol, Golgi membrane, membrane coat, cytoplasmic vesicle membrane, coated pit, trans-Golgi netwo…	TRUE	FALSE	FALSE	FALSE	FALSE	FALSE	FALSE	FALSE	FALSE	FALSE	FALSE	FALSE
ENSG00000152223	EPG5	autophagy	TRUE	FALSE	FALSE	FALSE	FALSE	FALSE	FALSE	FALSE	FALSE	FALSE	FALSE	FALSE
ENSG00000152558	TMEM123	oncosis, integral to membrane, external side of plasma membrane, receptor activity	TRUE	FALSE	FALSE	FALSE	FALSE	FALSE	FALSE	FALSE	FALSE	FALSE	FALSE	FALSE
ENSG00000152601	MBNL1	RNA splicing, regulation of alternative mRNA splicing, via spliceosome, in utero embryonic development, nervous system development, regulation of RNA splicing, myoblast differentiation, mRNA splice site selection, skeletal muscle tissue development, embryonic limb morphogenesis, nucleus, cytoplasm, cytoplasmic stress granule, RNA binding, zinc ion binding, protein binding, nucleic acid binding, d…	FALSE	FALSE	FALSE	FALSE	FALSE	FALSE	FALSE	FALSE	FALSE	FALSE	FALSE	FALSE
ENSG00000152778	IFIT5	biological_process, innate immune response, defense response to virus, cellular_component, RNA binding, molecular_function, protein binding	FALSE	FALSE	FALSE	FALSE	FALSE	FALSE	FALSE	FALSE	FALSE	FALSE	FALSE	FALSE
ENSG00000152795	HNRPDL	transcription, DNA-dependent, regulation of transcription, DNA-dependent, RNA processing, nucleus, cytoplasm, nucleotide binding, nucleic acid binding, double-stranded DNA binding, single-stranded DNA binding, poly(A) RNA binding	FALSE	FALSE	FALSE	FALSE	FALSE	FALSE	FALSE	FALSE	FALSE	FALSE	FALSE	FALSE
ENSG00000153107	ANAPC1	mitosis, cell division, mitotic cell cycle, cell cycle checkpoint, anaphase-promoting complex-dependent proteasomal ubiquitin-dependent protein catabolic process, positive regulation of ubiquitin-protein ligase activity involved in mitotic cell cycle, regulation of ubiquitin-protein ligase activity involved in mitotic cell cycle, protein K11-linked ubiquitination, negative regulation of ubiquitin…	FALSE	FALSE	FALSE	FALSE	FALSE	FALSE	FALSE	FALSE	FALSE	FALSE	FALSE	FALSE
ENSG00000153113	CAST	calcium-dependent cysteine-type endopeptidase inhibitor activity, negative regulation of endopeptidase activity, protein binding, endopeptidase inhibitor activity, negative regulation of peptidase activity, membrane	TRUE	FALSE	FALSE	FALSE	FALSE	FALSE	FALSE	FALSE	FALSE	FALSE	FALSE	FALSE
ENSG00000153201	RANBP2	protein folding, intracellular transport, intracellular, protein binding, peptidyl-prolyl cis-trans isomerase activity, transmembrane transport, small molecule metabolic process, mitotic cell cycle, viral reproduction, carbohydrate metabolic process, mRNA transport, mitotic prometaphase, protein import into nucleus, cytokine-mediated signaling pathway, regulation of glucose transport, M phase of …	FALSE	FALSE	FALSE	FALSE	FALSE	FALSE	FALSE	FALSE	FALSE	FALSE	FALSE	FALSE
ENSG00000153406	NMRAL1	potassium ion transport, metabolic process, nucleus, perinuclear region of cytoplasm, nucleolus, nucleotide binding, oxidoreductase activity	TRUE	FALSE	FALSE	FALSE	FALSE	FALSE	FALSE	FALSE	FALSE	FALSE	FALSE	FALSE
ENSG00000153832	FBXO36	protein binding	FALSE	FALSE	FALSE	FALSE	FALSE	FALSE	FALSE	FALSE	FALSE	FALSE	FALSE	FALSE
ENSG00000153936	HS2ST1	small molecule metabolic process, carbohydrate metabolic process, biosynthetic process, glycosaminoglycan biosynthetic process, glycosaminoglycan metabolic process, integral to membrane, Golgi membrane, Golgi apparatus, sulfotransferase activity, galactosylceramide sulfotransferase activity	FALSE	FALSE	FALSE	FALSE	FALSE	FALSE	FALSE	FALSE	FALSE	FALSE	FALSE	FALSE
ENSG00000153944	MSI2	nucleotide binding, nucleic acid binding, stem cell development, cytoplasm, polysome, RNA binding, single-stranded RNA binding, poly(U) RNA binding	TRUE	FALSE	FALSE	FALSE	FALSE	FALSE	FALSE	FALSE	FALSE	FALSE	FALSE	FALSE
ENSG00000154124	FAM105B		TRUE	FALSE	FALSE	FALSE	FALSE	FALSE	FALSE	FALSE	FALSE	FALSE	FALSE	FALSE
ENSG00000154330	PGM5	cell adhesion, carbohydrate metabolic process, glucose metabolic process, sarcolemma, intercalated disc, focal adhesion, stress fiber, cell-cell adherens junction, internal side of plasma membrane, Z disc, costamere, dystrophin-associated glycoprotein complex, spot adherens junction, structural molecule activity, magnesium ion binding, intramolecular transferase activity, phosphotransferases, cel…	TRUE	FALSE	FALSE	FALSE	FALSE	FALSE	FALSE	FALSE	FALSE	FALSE	FALSE	FALSE
ENSG00000154370	TRIM11	negative regulation of transcription, DNA-dependent, defense response to virus, negative regulation of neurogenesis, nucleus, cytoplasm, intracellular, zinc ion binding, protein binding, ubiquitin-protein ligase activity, transcription factor binding	TRUE	FALSE	FALSE	FALSE	FALSE	FALSE	FALSE	FALSE	FALSE	FALSE	FALSE	FALSE
ENSG00000154710	RABGEF1	DNA binding, zinc ion binding, protein transport, endocytosis, early endosome, recycling endosome, protein binding, Rab guanyl-nucleotide exchange factor activity	TRUE	FALSE	FALSE	FALSE	FALSE	FALSE	FALSE	FALSE	FALSE	FALSE	FALSE	FALSE
ENSG00000154803	FLCN	regulation of protein phosphorylation, nucleus, cytoplasm, plasma membrane, protein binding	TRUE	FALSE	FALSE	FALSE	FALSE	FALSE	FALSE	FALSE	FALSE	FALSE	FALSE	FALSE
ENSG00000155093	PTPRN2	protein dephosphorylation, dephosphorylation, protein tyrosine phosphatase activity, phosphatase activity, negative regulation of GTPase activity, integral to plasma membrane, terminal button, secretory granule, transport vesicle membrane, transmembrane receptor protein tyrosine phosphatase activity, endoplasmic reticulum lumen, cytoplasm, protein binding	TRUE	FALSE	FALSE	FALSE	FALSE	FALSE	FALSE	FALSE	FALSE	FALSE	FALSE	FALSE
ENSG00000155097	ATP6V1C1	ATP hydrolysis coupled proton transport, plasma membrane, cytoplasmic vesicle, apical part of cell, proton-transporting V-type ATPase, V1 domain, hydrolase activity, acting on acid anhydrides, catalyzing transmembrane movement of substances, hydrogen-exporting ATPase activity, phosphorylative mechanism, transmembrane transport, insulin receptor signaling pathway, proton transport, cellular iron i…	TRUE	FALSE	FALSE	FALSE	FALSE	FALSE	FALSE	FALSE	FALSE	FALSE	FALSE	FALSE
ENSG00000155307	SAMSN1	negative regulation of peptidyl-tyrosine phosphorylation, negative regulation of adaptive immune response, negative regulation of B cell activation, nucleus, cytosol, ruffle, protein binding, phosphotyrosine binding	FALSE	FALSE	FALSE	FALSE	FALSE	FALSE	FALSE	FALSE	FALSE	FALSE	FALSE	FALSE
ENSG00000155463	OXA1L	protein insertion into membrane, integral to membrane, mitochondrial inner membrane, mitochondrion, , oxidation-reduction process, protein tetramerization, protein complex assembly, negative regulation of ATPase activity, aerobic respiration, mitochondrial respiratory chain complex I assembly, negative regulation of oxidoreductase activity, mitochondrial proton-transporting ATP synthase complex a…	TRUE	FALSE	FALSE	FALSE	FALSE	FALSE	FALSE	FALSE	FALSE	FALSE	FALSE	FALSE
ENSG00000155542	SETD9		TRUE	FALSE	FALSE	FALSE	FALSE	FALSE	FALSE	FALSE	FALSE	FALSE	FALSE	FALSE
ENSG00000155719	OTOA	sensory perception of sound, apical plasma membrane, proteinaceous extracellular matrix, anchored to membrane	FALSE	FALSE	FALSE	FALSE	FALSE	FALSE	FALSE	FALSE	FALSE	FALSE	FALSE	FALSE
ENSG00000155744	FAM126B	intracellular	FALSE	FALSE	FALSE	FALSE	FALSE	FALSE	FALSE	FALSE	FALSE	FALSE	FALSE	FALSE
ENSG00000155876	RRAGA	apoptotic process, small GTPase mediated signal transduction, cellular protein localization, cellular response to amino acid stimulus, cell death, positive regulation of cytolysis, positive regulation of TOR signaling cascade, virus-host interaction, nucleus, cytoplasm, intracellular membrane-bounded organelle, Golgi apparatus, lysosome, protein homodimerization activity, protein binding, GTP bin…	FALSE	FALSE	FALSE	FALSE	FALSE	FALSE	FALSE	FALSE	FALSE	FALSE	FALSE	FALSE
ENSG00000156097	GPR61	biological_process, G-protein coupled receptor signaling pathway, integral to membrane, cellular_component, plasma membrane, G-protein coupled receptor activity	FALSE	FALSE	FALSE	FALSE	FALSE	FALSE	FALSE	FALSE	FALSE	FALSE	FALSE	FALSE
ENSG00000156381	ANKRD9	protein binding	FALSE	FALSE	FALSE	FALSE	FALSE	FALSE	FALSE	FALSE	FALSE	FALSE	FALSE	FALSE
ENSG00000156508	EEF1A1	transcription, DNA-dependent, translation, regulation of transcription, DNA-dependent, gene expression, translational elongation, cellular protein metabolic process, nucleus, cytoplasm, cytosol, eukaryotic translation elongation factor 1 complex, protein binding, GTP binding, GTPase activity, protein kinase binding, translation elongation factor activity	FALSE	FALSE	FALSE	FALSE	FALSE	FALSE	FALSE	FALSE	FALSE	FALSE	FALSE	FALSE
ENSG00000156587	UBE2L6	innate immune response, cellular protein modification process, cytokine-mediated signaling pathway, negative regulation of type I interferon production, modification-dependent protein catabolic process, ISG15-protein conjugation, cytosol, protein binding, ATP binding, ubiquitin-protein ligase activity, acid-amino acid ligase activity, ISG15 ligase activity, small conjugating protein ligase activi…	FALSE	FALSE	FALSE	FALSE	FALSE	FALSE	FALSE	FALSE	FALSE	FALSE	FALSE	FALSE
ENSG00000156650	KAT6B	transcription, DNA-dependent, positive regulation of transcription, DNA-dependent, negative regulation of transcription, DNA-dependent, regulation of transcription, DNA-dependent, nucleosome assembly, histone acetylation, histone H3 acetylation, nucleus, nucleosome, MOZ/MORF histone acetyltransferase complex, DNA binding, zinc ion binding, protein binding, transferase activity, transferring acyl …	FALSE	FALSE	FALSE	FALSE	FALSE	FALSE	FALSE	FALSE	FALSE	FALSE	FALSE	FALSE
ENSG00000156873	PHKG2	small molecule metabolic process, carbohydrate metabolic process, protein phosphorylation, glycogen metabolic process, glucose metabolic process, glycogen biosynthetic process, glycogen catabolic process, generation of precursor metabolites and energy, positive regulation of glycogen catabolic process, cellular_component, cytosol, phosphorylase kinase complex, ATP binding, protein serine/threonin…	FALSE	FALSE	FALSE	FALSE	FALSE	FALSE	FALSE	FALSE	FALSE	FALSE	FALSE	FALSE
ENSG00000157193	LRP8	proteolysis, negative regulation of transcription from RNA polymerase II promoter, lipid metabolic process, signal transduction, layer formation in cerebral cortex, endocytosis, cytokine-mediated signaling pathway, positive regulation of peptidyl-tyrosine phosphorylation, blood coagulation, regulation of synaptic transmission, positive regulation of dendritic spine morphogenesis, positive regulat…	FALSE	FALSE	FALSE	FALSE	FALSE	FALSE	FALSE	FALSE	FALSE	FALSE	FALSE	FALSE
ENSG00000157216	SSBP3	negative regulation of apoptotic process, positive regulation of transcription from RNA polymerase II promoter, positive regulation of cell proliferation, protein complex assembly, positive regulation of anterior head development, head morphogenesis, midbrain-hindbrain boundary initiation, prechordal plate formation, nucleus, protein complex, DNA binding, single-stranded DNA binding, transcriptio…	FALSE	FALSE	FALSE	FALSE	FALSE	FALSE	FALSE	FALSE	FALSE	FALSE	FALSE	FALSE
ENSG00000157601	MX1	innate immune response, induction of apoptosis, response to virus, signal transduction, negative regulation of viral genome replication, defense response to virus, cytokine-mediated signaling pathway, defense response, type I interferon-mediated signaling pathway, response to type I interferon, nucleus, cytoplasm, cytosol, endoplasmic reticulum membrane, perinuclear region of cytoplasm, protein b…	TRUE	FALSE	FALSE	FALSE	FALSE	FALSE	FALSE	FALSE	FALSE	FALSE	FALSE	FALSE
ENSG00000157693	C9orf91	integral to membrane	FALSE	FALSE	FALSE	FALSE	FALSE	FALSE	FALSE	FALSE	FALSE	FALSE	FALSE	FALSE
ENSG00000158062	UBXN11	cytoplasm, cytoskeleton, protein binding	TRUE	FALSE	FALSE	FALSE	FALSE	FALSE	FALSE	FALSE	FALSE	FALSE	FALSE	FALSE
ENSG00000158104	HPD	oxidation-reduction process, aromatic amino acid family metabolic process, Golgi membrane, endoplasmic reticulum, endoplasmic reticulum membrane, Golgi apparatus, 4-hydroxyphenylpyruvate dioxygenase activity, oxidoreductase activity, acting on single donors with incorporation of molecular oxygen, small molecule metabolic process, cellular nitrogen compound metabolic process, L-phenylalanine catab…	TRUE	FALSE	FALSE	FALSE	FALSE	FALSE	FALSE	FALSE	FALSE	FALSE	FALSE	FALSE
ENSG00000158161	EYA3	transcription, DNA-dependent, multicellular organismal development, visual perception, regulation of transcription, DNA-dependent, metabolic process, double-strand break repair, response to ionizing radiation, positive regulation of DNA repair, histone dephosphorylation, anatomical structure morphogenesis, protein dephosphorylation, nucleus, transcription factor complex, cytoplasm, protein bindin…	TRUE	FALSE	FALSE	FALSE	FALSE	FALSE	FALSE	FALSE	FALSE	FALSE	FALSE	FALSE
ENSG00000158234	FAIM	apoptotic process, negative regulation of apoptotic process, cytoplasm	FALSE	FALSE	FALSE	FALSE	FALSE	FALSE	FALSE	FALSE	FALSE	FALSE	FALSE	FALSE
ENSG00000158435	C2orf29	cell proliferation, gene expression, RNA metabolic process, mRNA metabolic process, nuclear-transcribed mRNA poly(A) tail shortening, nuclear-transcribed mRNA catabolic process, deadenylation-dependent decay, cellular_component, cytosol, molecular_function	FALSE	FALSE	FALSE	FALSE	FALSE	FALSE	FALSE	FALSE	FALSE	FALSE	FALSE	FALSE
ENSG00000158552	ZFAND2B	zinc ion binding, endoplasmic reticulum, protein binding	TRUE	FALSE	FALSE	FALSE	FALSE	FALSE	FALSE	FALSE	FALSE	FALSE	FALSE	FALSE
ENSG00000158669	AGPAT6	triglyceride biosynthetic process, cellular lipid metabolic process, small molecule metabolic process, metabolic process, phospholipid metabolic process, fatty acid metabolic process, acyl-CoA metabolic process, lipid biosynthetic process, lactation, regulation of multicellular organism growth, phosphatidic acid biosynthetic process, glandular epithelial cell maturation, diacylglycerol metabolic …	TRUE	FALSE	FALSE	FALSE	FALSE	FALSE	FALSE	FALSE	FALSE	FALSE	FALSE	FALSE
ENSG00000158711	ELK4	transcription, DNA-dependent, negative regulation of transcription from RNA polymerase II promoter, regulation of transcription, DNA-dependent, histone H3 deacetylation, nucleus, cytoplasm, DNA binding, sequence-specific DNA binding transcription factor activity, protein binding, sequence-specific DNA binding, chromatin binding, transcription cofactor activity, core promoter binding	TRUE	FALSE	FALSE	FALSE	FALSE	FALSE	FALSE	FALSE	FALSE	FALSE	FALSE	FALSE
ENSG00000158716	DUSP23	protein dephosphorylation, dephosphorylation, nucleus, cytosol, intracellular membrane-bounded organelle, protein tyrosine phosphatase activity, protein tyrosine/serine/threonine phosphatase activity, phosphatase activity	FALSE	FALSE	FALSE	FALSE	FALSE	FALSE	FALSE	FALSE	FALSE	FALSE	FALSE	FALSE
ENSG00000158792	SPATA2L		TRUE	FALSE	FALSE	FALSE	FALSE	FALSE	FALSE	FALSE	FALSE	FALSE	FALSE	FALSE
ENSG00000158882	TOMM40L	biological_process, transmembrane transport, protein transport, regulation of anion transport, anion transport, mitochondrial outer membrane, protein complex, pore complex, mitochondrion, molecular_function, voltage-gated anion channel activity, porin activity	TRUE	FALSE	FALSE	FALSE	FALSE	FALSE	FALSE	FALSE	FALSE	FALSE	FALSE	FALSE
ENSG00000158941	KIAA1967	apoptotic process, mRNA processing, RNA splicing, positive regulation of apoptotic process, negative regulation of catalytic activity, regulation of DNA-dependent transcription, elongation, nucleus, cytoplasm, mitochondrial matrix, DBIRD complex, protein binding, enzyme binding, enzyme inhibitor activity, RNA polymerase II core binding	FALSE	FALSE	FALSE	FALSE	FALSE	FALSE	FALSE	FALSE	FALSE	FALSE	FALSE	FALSE
ENSG00000159069	FBXW5	protein ubiquitination, centrosome duplication, proteasomal ubiquitin-dependent protein catabolic process, SCF-dependent proteasomal ubiquitin-dependent protein catabolic process, cytoplasm, SCF ubiquitin ligase complex, Cul4-RING ubiquitin ligase complex, protein binding, catalytic activity, protein kinase binding	TRUE	FALSE	FALSE	FALSE	FALSE	FALSE	FALSE	FALSE	FALSE	FALSE	FALSE	FALSE
ENSG00000159348	CYB5R1	oxidation-reduction process, sterol biosynthetic process, integral to membrane, mitochondrion, oxidoreductase activity, cytochrome-b5 reductase activity	TRUE	FALSE	FALSE	FALSE	FALSE	FALSE	FALSE	FALSE	FALSE	FALSE	FALSE	FALSE
ENSG00000159352	PSMD4	apoptotic process, regulation of apoptotic process, small molecule metabolic process, protein polyubiquitination, antigen processing and presentation of peptide antigen via MHC class I, mitotic cell cycle, viral reproduction, cell cycle checkpoint, S phase of mitotic cell cycle, M/G1 transition of mitotic cell cycle, antigen processing and presentation of exogenous peptide antigen via MHC class I…	FALSE	FALSE	FALSE	FALSE	FALSE	FALSE	FALSE	FALSE	FALSE	FALSE	FALSE	FALSE
ENSG00000159374	C2orf65	spermatogenesis, RNA processing, female gamete generation, chromatin assembly, integral to membrane, molecular_function	FALSE	FALSE	FALSE	FALSE	FALSE	FALSE	FALSE	FALSE	FALSE	FALSE	FALSE	FALSE
ENSG00000159658	KIAA0494	calcium ion binding	TRUE	FALSE	FALSE	FALSE	FALSE	FALSE	FALSE	FALSE	FALSE	FALSE	FALSE	FALSE
ENSG00000160050	CCDC28B	cilium assembly, centrosome, protein binding	FALSE	FALSE	FALSE	FALSE	FALSE	FALSE	FALSE	FALSE	FALSE	FALSE	FALSE	FALSE
ENSG00000160051	IQCC	protein binding	FALSE	FALSE	FALSE	FALSE	FALSE	FALSE	FALSE	FALSE	FALSE	FALSE	FALSE	FALSE
ENSG00000160124	CCDC58	mitochondrion	FALSE	FALSE	FALSE	FALSE	FALSE	FALSE	FALSE	FALSE	FALSE	FALSE	FALSE	FALSE
ENSG00000160213	CSTB	regulation of apoptotic process, negative regulation of endopeptidase activity, adult locomotory behavior, negative regulation of peptidase activity, cytoplasm, nucleolus, cysteine-type endopeptidase inhibitor activity, endopeptidase inhibitor activity, protease binding, protein binding	TRUE	FALSE	FALSE	FALSE	FALSE	FALSE	FALSE	FALSE	FALSE	FALSE	FALSE	FALSE
ENSG00000160229	ZNF66P	regulation of transcription, DNA-dependent, intracellular, nucleic acid binding, zinc ion binding	TRUE	FALSE	FALSE	FALSE	FALSE	FALSE	FALSE	FALSE	FALSE	FALSE	FALSE	FALSE
ENSG00000160325	CACFD1	biological_process, synaptic vesicle endocytosis, integral to membrane, cellular_component, integral to synaptic vesicle membrane, molecular_function, calcium channel activity	TRUE	FALSE	FALSE	FALSE	FALSE	FALSE	FALSE	FALSE	FALSE	FALSE	FALSE	FALSE
ENSG00000160447	PKN3	signal transduction, protein phosphorylation, epithelial cell migration, nucleus, intracellular, perinuclear region of cytoplasm, Golgi apparatus, protein binding, ATP binding, protein serine/threonine kinase activity, protein kinase activity, protein tyrosine kinase activity, transferase activity, transferring phosphorus-containing groups, protein kinase C activity	TRUE	FALSE	FALSE	FALSE	FALSE	FALSE	FALSE	FALSE	FALSE	FALSE	FALSE	FALSE
ENSG00000160703	NLRX1	mitochondrion, innate immune response, negative regulation of type I interferon production, virus-host interaction, mitochondrial outer membrane, protein binding, ATP binding	FALSE	FALSE	FALSE	FALSE	FALSE	FALSE	TRUE	FALSE	FALSE	FALSE	FALSE	FALSE
ENSG00000160753	RUSC1	protein polyubiquitination, nucleus, cytoplasm, plasma membrane, cell junction, Golgi apparatus, postsynaptic membrane, microtubule, cytoplasmic vesicle, microtubule cytoskeleton, postsynaptic density, early endosome, cytoplasmic membrane-bounded vesicle, protein binding, actin binding, SH3/SH2 adaptor activity	FALSE	FALSE	FALSE	FALSE	FALSE	FALSE	FALSE	FALSE	FALSE	FALSE	FALSE	FALSE
ENSG00000160932	LY6E	organ growth, in utero embryonic development, adrenal gland development, ventricular cardiac muscle tissue morphogenesis, norepinephrine metabolic process, epinephrine secretion, cell surface receptor signaling pathway, integral to plasma membrane, anchored to membrane	TRUE	FALSE	FALSE	FALSE	FALSE	FALSE	FALSE	FALSE	FALSE	FALSE	FALSE	FALSE
ENSG00000160972	PPP1R16A	cytoskeleton organization, plasma membrane, protein binding, actin binding	TRUE	FALSE	FALSE	FALSE	FALSE	FALSE	FALSE	FALSE	FALSE	FALSE	FALSE	FALSE
ENSG00000160993	ALKBH4	oxidation-reduction process, nucleus, mitochondrion, oxidoreductase activity, metal ion binding, oxidoreductase activity, acting on single donors with incorporation of molecular oxygen, incorporation of two atoms of oxygen, oxidoreductase activity, acting on paired donors, with incorporation or reduction of molecular oxygen, 2-oxoglutarate as one donor, and incorporation of one atom each of oxyge…	TRUE	FALSE	FALSE	FALSE	FALSE	FALSE	FALSE	FALSE	FALSE	FALSE	FALSE	FALSE
ENSG00000161011	SQSTM1	pre-autophagosomal structure, zinc ion binding, identical protein binding, K63-linked polyubiquitin binding, ubiquitin-dependent protein catabolic process, apoptotic process, cell differentiation, autophagy, intracellular signal transduction, positive regulation of transcription from RNA polymerase II promoter, endosomal transport, response to stress, protein localization, regulation of I-kappaB …	FALSE	FALSE	FALSE	FALSE	FALSE	FALSE	FALSE	FALSE	FALSE	FALSE	FALSE	FALSE
ENSG00000161036	LRWD1	DNA replication initiation, chromatin modification, chromatin organization, G1 phase of mitotic cell cycle, establishment of protein localization to chromatin, nucleus, centromeric heterochromatin, nuclear origin of replication recognition complex, telomeric heterochromatin, protein binding, chromatin binding, methylated histone residue binding, methyl-CpG binding	TRUE	FALSE	FALSE	FALSE	FALSE	FALSE	FALSE	FALSE	FALSE	FALSE	FALSE	FALSE
ENSG00000161654	LSM12		FALSE	FALSE	FALSE	FALSE	FALSE	FALSE	FALSE	FALSE	FALSE	FALSE	FALSE	FALSE
ENSG00000161905	ALOX15	inflammatory response, oxidation-reduction process, lipid metabolic process, leukotriene biosynthetic process, leukotriene metabolic process, bone mineralization, lipoxygenase pathway, ossification, nucleus, cytoplasm, cytosol, protein binding, metal ion binding, iron ion binding, oxidoreductase activity, acting on single donors with incorporation of molecular oxygen, incorporation of two atoms o…	TRUE	FALSE	FALSE	FALSE	FALSE	FALSE	FALSE	FALSE	FALSE	FALSE	FALSE	FALSE
ENSG00000161981	SNRNP25	mRNA processing, RNA splicing, nucleus, U12-type spliceosomal complex	TRUE	FALSE	FALSE	FALSE	FALSE	FALSE	FALSE	FALSE	FALSE	FALSE	FALSE	FALSE
ENSG00000162032	SPSB3	protein ubiquitination, intracellular signal transduction, intracellular, protein binding	TRUE	FALSE	FALSE	FALSE	FALSE	FALSE	FALSE	FALSE	FALSE	FALSE	FALSE	FALSE
ENSG00000162066	AMDHD2	hydrolase activity, hydrolase activity, acting on carbon-nitrogen (but not peptide) bonds, carbohydrate metabolic process, N-acetylglucosamine metabolic process, metal ion binding, N-acetylglucosamine-6-phosphate deacetylase activity	FALSE	FALSE	FALSE	FALSE	FALSE	FALSE	FALSE	FALSE	FALSE	FALSE	FALSE	FALSE
ENSG00000162300	ZFPL1	regulation of transcription, DNA-dependent, vesicle-mediated transport, integral to membrane, nucleus, Golgi apparatus, DNA binding, zinc ion binding	FALSE	FALSE	FALSE	FALSE	FALSE	FALSE	FALSE	FALSE	FALSE	FALSE	FALSE	FALSE
ENSG00000162341	TPCN2	transmembrane transport, ion transport, smooth muscle contraction, release of sequestered calcium ion into cytosol, integral to membrane, membrane, lysosomal membrane, ion channel activity, voltage-gated calcium channel activity, NAADP-sensitive calcium-release channel activity, cellular calcium ion homeostasis, endosome membrane, lysosome, protein binding, protein kinase binding, identical prote…	TRUE	FALSE	FALSE	FALSE	FALSE	FALSE	FALSE	FALSE	FALSE	FALSE	FALSE	FALSE
ENSG00000162378	ZYG11B	binding	TRUE	FALSE	FALSE	FALSE	FALSE	FALSE	FALSE	FALSE	FALSE	FALSE	FALSE	FALSE
ENSG00000162385	MAGOH	gene expression, RNA metabolic process, mRNA metabolic process, RNA splicing, regulation of translation, transcription from RNA polymerase II promoter, mRNA export from nucleus, mRNA splicing, via spliceosome, nuclear-transcribed mRNA catabolic process, nonsense-mediated decay, termination of RNA polymerase II transcription, mRNA 3'-end processing, nucleus, cytosol, nucleoplasm, nuclear speck, ex…	FALSE	FALSE	FALSE	FALSE	FALSE	FALSE	FALSE	FALSE	FALSE	FALSE	FALSE	FALSE
ENSG00000162402	USP24	ubiquitin-dependent protein catabolic process, protein binding, ubiquitin thiolesterase activity, cysteine-type peptidase activity, binding	TRUE	FALSE	FALSE	FALSE	FALSE	FALSE	FALSE	FALSE	FALSE	FALSE	FALSE	FALSE
ENSG00000162413	KLHL21	protein ubiquitination, mitosis, cytokinesis, anaphase, cytoplasm, polar microtubule, Cul3-RING ubiquitin ligase complex, protein binding, ubiquitin-protein ligase activity	FALSE	FALSE	FALSE	FALSE	FALSE	FALSE	FALSE	FALSE	FALSE	FALSE	FALSE	FALSE
ENSG00000162736	NCSTN	proteolysis, apoptotic process, epithelial cell proliferation, Notch signaling pathway, myeloid cell homeostasis, protein processing, positive regulation of catalytic activity, beta-amyloid metabolic process, T cell proliferation, membrane protein ectodomain proteolysis, Notch receptor processing, amyloid precursor protein catabolic process, nerve growth factor receptor signaling pathway, membran…	TRUE	FALSE	FALSE	FALSE	FALSE	FALSE	FALSE	FALSE	FALSE	FALSE	FALSE	FALSE
ENSG00000162757	C1orf74		TRUE	FALSE	FALSE	FALSE	FALSE	FALSE	FALSE	FALSE	FALSE	FALSE	FALSE	FALSE
ENSG00000162769	FLVCR1	transmembrane transport, multicellular organismal development, multicellular organism growth, transport, in utero embryonic development, erythrocyte differentiation, embryonic digit morphogenesis, cell death, spleen development, cellular iron ion homeostasis, regulation of organ growth, head morphogenesis, heme export, limb morphogenesis, integral to membrane, plasma membrane, integral to plasma …	TRUE	FALSE	FALSE	FALSE	FALSE	FALSE	FALSE	FALSE	FALSE	FALSE	FALSE	FALSE
ENSG00000162775	RBM15	placenta blood vessel development, patterning of blood vessels, ventricular septum morphogenesis, spleen development, negative regulation of myeloid cell differentiation, virus-host interaction, positive regulation of transcription of Notch receptor target, negative regulation of transcription from RNA polymerase II promoter, nucleus, nucleotide binding, RNA binding, protein binding, nucleic acid…	FALSE	FALSE	FALSE	FALSE	FALSE	FALSE	FALSE	FALSE	FALSE	FALSE	FALSE	FALSE
ENSG00000162869	PPP1R21	oxidation-reduction process, oxidoreductase activity, phosphatase binding, transition metal ion binding	TRUE	FALSE	FALSE	FALSE	FALSE	FALSE	FALSE	FALSE	FALSE	FALSE	FALSE	FALSE
ENSG00000162894	FAIM3	negative regulation of apoptotic process, cellular defense response, integral to membrane	FALSE	FALSE	FALSE	FALSE	FALSE	FALSE	FALSE	FALSE	FALSE	FALSE	FALSE	FALSE
ENSG00000162909	CAPN2	proteolysis, intracellular, calcium-dependent cysteine-type endopeptidase activity, response to hypoxia, myoblast fusion, blastocyst development, protein autoprocessing, nucleus, cytoplasm, plasma membrane, chromatin, protein binding, calcium ion binding, cytoskeletal protein binding, protein heterodimerization activity, cysteine-type peptidase activity, peptidase activity	FALSE	FALSE	FALSE	FALSE	FALSE	FALSE	TRUE	FALSE	FALSE	FALSE	FALSE	FALSE
ENSG00000162929	KIAA1841	DNA binding	TRUE	FALSE	FALSE	FALSE	FALSE	FALSE	FALSE	FALSE	FALSE	FALSE	FALSE	FALSE
ENSG00000163050	ADCK3	cell death, mitochondrion, ATP binding, protein serine/threonine kinase activity, transferase activity, transferring phosphorus-containing groups	TRUE	FALSE	FALSE	FALSE	FALSE	FALSE	FALSE	FALSE	FALSE	FALSE	FALSE	FALSE
ENSG00000163293	NIPAL1	magnesium ion transport, integral to membrane, membrane, magnesium ion transmembrane transporter activity	TRUE	FALSE	FALSE	FALSE	FALSE	FALSE	FALSE	FALSE	FALSE	FALSE	FALSE	FALSE
ENSG00000163346	PBXIP1	cell differentiation, multicellular organismal development, negative regulation of transcription, DNA-dependent, nucleus, cytoplasm, cytosol, intracellular membrane-bounded organelle, microtubule, protein binding, transcription corepressor activity, DNA binding	FALSE	FALSE	FALSE	FALSE	FALSE	FALSE	FALSE	FALSE	FALSE	FALSE	FALSE	FALSE
ENSG00000163382	APOA1BP	biological_process, protein homotetramerization, extracellular region, mitochondrion, extracellular space, cell body, flagellum, nucleotide binding, protein homodimerization activity, protein binding, metal ion binding, isomerase activity	TRUE	FALSE	FALSE	FALSE	FALSE	FALSE	FALSE	FALSE	FALSE	FALSE	FALSE	FALSE
ENSG00000163597	SNHG16		TRUE	FALSE	FALSE	FALSE	FALSE	FALSE	FALSE	FALSE	FALSE	FALSE	FALSE	FALSE
ENSG00000163682	RPL9	translation, viral reproduction, gene expression, RNA metabolic process, mRNA metabolic process, translational elongation, cellular protein metabolic process, SRP-dependent cotranslational protein targeting to membrane, translational initiation, viral infectious cycle, nuclear-transcribed mRNA catabolic process, nonsense-mediated decay, translational termination, viral transcription, cytoplasm, c…	TRUE	FALSE	FALSE	FALSE	FALSE	FALSE	FALSE	FALSE	FALSE	FALSE	FALSE	FALSE
ENSG00000163950	SLBP	gene expression, mRNA processing, mRNA transport, transcription from RNA polymerase II promoter, mRNA export from nucleus, regulation of S phase, termination of RNA polymerase II transcription, histone mRNA metabolic process, histone mRNA 3'-end processing, DNA replication involved in S phase, nucleus, cytoplasm, cytosol, nucleoplasm, ribonucleoprotein complex, histone pre-mRNA 3'end processing c…	TRUE	FALSE	FALSE	FALSE	FALSE	FALSE	FALSE	FALSE	FALSE	FALSE	FALSE	FALSE
ENSG00000163956	LRPAP1	protein folding, vesicle-mediated transport, negative regulation of protein binding, extracellular negative regulation of signal transduction, negative regulation of very-low-density lipoprotein particle clearance, negative regulation of beta-amyloid clearance, integral to membrane, plasma membrane, extracellular region, endoplasmic reticulum, cell surface, vesicle, rough endoplasmic reticulum lu…	TRUE	FALSE	FALSE	FALSE	FALSE	FALSE	FALSE	FALSE	FALSE	FALSE	FALSE	FALSE
ENSG00000163964	PIGX	GPI anchor biosynthetic process, endoplasmic reticulum membrane, cellular protein metabolic process, post-translational protein modification, C-terminal protein lipidation, preassembly of GPI anchor in ER membrane, integral to membrane	TRUE	FALSE	FALSE	FALSE	FALSE	FALSE	FALSE	FALSE	FALSE	FALSE	FALSE	FALSE
ENSG00000164002	EXO5	biological_process, cellular_component, molecular_function, DNA binding, exonuclease activity	FALSE	FALSE	FALSE	FALSE	FALSE	FALSE	FALSE	FALSE	FALSE	FALSE	FALSE	FALSE
ENSG00000164111	ANXA5	negative regulation of apoptotic process, protein homooligomerization, signal transduction, positive regulation of apoptotic process, negative regulation of coagulation, response to organic substance, blood coagulation, cytoplasm, intracellular, cell projection, sarcolemma, intercalated disc, external side of plasma membrane, endothelial microparticle, phospholipid binding, calcium ion binding, p…	TRUE	FALSE	FALSE	FALSE	FALSE	FALSE	FALSE	FALSE	FALSE	FALSE	FALSE	FALSE
ENSG00000164134	NAA15	transcription, DNA-dependent, cell differentiation, positive regulation of transcription, DNA-dependent, angiogenesis, N-terminal protein amino acid acetylation, nucleus, transcription factor complex, cytoplasm, protein binding, N-acetyltransferase activity, ribosome binding, acetyltransferase activity	FALSE	FALSE	FALSE	FALSE	FALSE	FALSE	FALSE	FALSE	FALSE	FALSE	FALSE	FALSE
ENSG00000164151	KIAA0947	lipid transport, lipid transporter activity	FALSE	FALSE	FALSE	FALSE	FALSE	FALSE	FALSE	FALSE	FALSE	FALSE	FALSE	FALSE
ENSG00000164164	OTUD4	biological_process, cellular_component, molecular_function	FALSE	FALSE	FALSE	FALSE	FALSE	FALSE	FALSE	FALSE	FALSE	FALSE	FALSE	FALSE
ENSG00000164175	SLC45A2	transmembrane transport, visual perception, response to stimulus, melanin biosynthetic process, developmental pigmentation, integral to membrane, melanosome membrane	TRUE	FALSE	FALSE	FALSE	FALSE	FALSE	FALSE	FALSE	FALSE	FALSE	FALSE	FALSE
ENSG00000164221	CCDC112	DNA binding	TRUE	FALSE	FALSE	FALSE	FALSE	FALSE	FALSE	FALSE	FALSE	FALSE	FALSE	FALSE
ENSG00000164329	PAPD4	mRNA processing, RNA polyadenylation, histone mRNA catabolic process, cytoplasm, nuclear RNA-directed RNA polymerase complex, ATP binding, metal ion binding, polynucleotide adenylyltransferase activity, , nucleus, protein binding	FALSE	FALSE	FALSE	FALSE	FALSE	FALSE	FALSE	FALSE	FALSE	FALSE	FALSE	FALSE
ENSG00000164332	UBLCP1	nucleus, nucleolus, protein binding, phosphoprotein phosphatase activity	TRUE	FALSE	FALSE	FALSE	FALSE	FALSE	FALSE	FALSE	FALSE	FALSE	FALSE	FALSE
ENSG00000164587	RPS14	negative regulation of transcription from RNA polymerase II promoter, translation, viral reproduction, gene expression, RNA metabolic process, mRNA metabolic process, translational elongation, cellular protein metabolic process, regulation of translation, erythrocyte differentiation, SRP-dependent cotranslational protein targeting to membrane, translational initiation, viral infectious cycle, nuc…	TRUE	FALSE	FALSE	FALSE	FALSE	FALSE	FALSE	FALSE	FALSE	FALSE	FALSE	FALSE
ENSG00000164808	KIAA0146		FALSE	FALSE	FALSE	FALSE	FALSE	FALSE	FALSE	FALSE	FALSE	FALSE	FALSE	FALSE
ENSG00000164823	OSGIN2	meiosis, germ cell development, cellular_component, molecular_function	TRUE	FALSE	FALSE	FALSE	FALSE	FALSE	FALSE	FALSE	FALSE	FALSE	FALSE	FALSE
ENSG00000164877	MICALL2	endocytosis, cytoplasm, tight junction, actin filament bundle, zinc ion binding, protein binding	FALSE	FALSE	FALSE	FALSE	FALSE	FALSE	FALSE	FALSE	FALSE	FALSE	FALSE	FALSE
ENSG00000164898	C7orf55	mitochondrion	FALSE	FALSE	FALSE	FALSE	FALSE	FALSE	FALSE	FALSE	FALSE	FALSE	FALSE	FALSE
ENSG00000164944	KIAA1429	mRNA processing, RNA splicing, nucleus, binding	TRUE	FALSE	FALSE	FALSE	FALSE	FALSE	FALSE	FALSE	FALSE	FALSE	FALSE	FALSE
ENSG00000165233	C9orf89	negative regulation of I-kappaB kinase/NF-kappaB cascade, nucleus, cytosol, CARD domain binding	TRUE	FALSE	FALSE	FALSE	FALSE	FALSE	FALSE	FALSE	FALSE	FALSE	FALSE	FALSE
ENSG00000165264	NDUFB6	small molecule metabolic process, respiratory electron transport chain, mitochondrial electron transport, NADH to ubiquinone, integral to membrane, nucleus, mitochondrion, mitochondrial inner membrane, mitochondrial respiratory chain complex I, mitochondrial membrane, NADH dehydrogenase (ubiquinone) activity	FALSE	FALSE	FALSE	FALSE	FALSE	FALSE	FALSE	FALSE	FALSE	FALSE	FALSE	FALSE
ENSG00000165424	ZCCHC24	zinc ion binding, nucleic acid binding	TRUE	FALSE	FALSE	FALSE	FALSE	FALSE	FALSE	FALSE	FALSE	FALSE	FALSE	FALSE
ENSG00000165527	ARF6	apoptotic process, small GTPase mediated signal transduction, G-protein coupled receptor signaling pathway, protein transport, cell adhesion, intracellular protein transport, vesicle-mediated transport, positive regulation of actin filament polymerization, cellular component movement, liver development, ruffle organization, cortical actin cytoskeleton organization, establishment of epithelial cel…	FALSE	FALSE	FALSE	FALSE	FALSE	FALSE	FALSE	FALSE	FALSE	FALSE	FALSE	FALSE
ENSG00000165548	TMEM63C	integral to membrane, membrane	TRUE	FALSE	TRUE	FALSE	FALSE	FALSE	FALSE	FALSE	FALSE	FALSE	FALSE	FALSE
ENSG00000165650	PDZD8	cytoskeleton organization, intracellular signal transduction, regulation of cell morphogenesis, virus-host interaction, intracellular, protein binding, metal ion binding	TRUE	FALSE	FALSE	FALSE	FALSE	FALSE	FALSE	FALSE	FALSE	FALSE	FALSE	FALSE
ENSG00000165699	TSC1	potassium ion transport, negative regulation of cell proliferation, cell projection organization, regulation of cell-matrix adhesion, cell-matrix adhesion, cardiac muscle cell differentiation, neural tube closure, cell cycle arrest, cerebral cortex development, regulation of translation, response to insulin stimulus, insulin receptor signaling pathway, negative regulation of cell size, regulation…	FALSE	FALSE	FALSE	FALSE	FALSE	FALSE	FALSE	FALSE	FALSE	FALSE	FALSE	FALSE
ENSG00000165732	DDX21	response to virus, response to exogenous dsRNA, nucleus, nucleolus, RNA binding, DNA binding, ATP binding, nucleic acid binding, hydrolase activity, double-stranded RNA binding, ATP-dependent helicase activity, helicase activity, ATP-dependent RNA helicase activity, protein binding	FALSE	FALSE	FALSE	FALSE	FALSE	FALSE	FALSE	FALSE	FALSE	FALSE	FALSE	FALSE
ENSG00000165861	ZFYVE1	metal ion binding, negative regulation of phosphatase activity, perinuclear region of cytoplasm, endoplasmic reticulum, Golgi stack, zinc ion binding, protein binding, 1-phosphatidylinositol binding, phosphatidylinositol-3,4,5-trisphosphate binding, phosphatidylinositol-3,4-bisphosphate binding	TRUE	FALSE	FALSE	FALSE	FALSE	FALSE	FALSE	FALSE	FALSE	FALSE	FALSE	FALSE
ENSG00000165886	UBTD1	protein binding	FALSE	FALSE	FALSE	FALSE	FALSE	FALSE	FALSE	FALSE	FALSE	FALSE	FALSE	FALSE
ENSG00000166004	KIAA1731	cytoplasm, cytoskeleton, centrosome	FALSE	FALSE	FALSE	FALSE	FALSE	FALSE	FALSE	FALSE	FALSE	FALSE	FALSE	FALSE
ENSG00000166123	GPT2	small molecule metabolic process, cellular nitrogen compound metabolic process, biosynthetic process, 2-oxoglutarate metabolic process, cellular amino acid biosynthetic process, L-alanine catabolic process, L-alanine metabolic process, mitochondrial matrix, mitochondrion, pyridoxal phosphate binding, L-alanine:2-oxoglutarate aminotransferase activity, catalytic activity	FALSE	FALSE	FALSE	FALSE	FALSE	FALSE	FALSE	FALSE	FALSE	FALSE	FALSE	FALSE
ENSG00000166130	IKBIP	induction of apoptosis, response to X-ray, integral to membrane, endoplasmic reticulum membrane, endoplasmic reticulum, protein binding	TRUE	FALSE	FALSE	FALSE	FALSE	FALSE	FALSE	FALSE	FALSE	FALSE	FALSE	FALSE
ENSG00000166181	API5	binding, nucleus, apoptotic process, negative regulation of apoptotic process, cytoplasm, spliceosomal complex, fibroblast growth factor binding	TRUE	FALSE	FALSE	FALSE	FALSE	FALSE	FALSE	FALSE	FALSE	FALSE	FALSE	FALSE
ENSG00000166189	HPS6	melanocyte differentiation, blood coagulation, organelle organization, pigmentation, cytosol, endoplasmic reticulum, early endosome membrane, protein binding	TRUE	FALSE	FALSE	FALSE	FALSE	FALSE	FALSE	FALSE	FALSE	FALSE	FALSE	FALSE
ENSG00000166192	SENP8	proteolysis, cysteine-type peptidase activity	FALSE	FALSE	FALSE	FALSE	FALSE	FALSE	FALSE	FALSE	FALSE	FALSE	FALSE	FALSE
ENSG00000166224	SGPL1	apoptotic process, spermatogenesis, small molecule metabolic process, metabolic process, post-embryonic development, nitrogen compound metabolic process, fibroblast migration, phospholipid metabolic process, platelet-derived growth factor receptor signaling pathway, sphingolipid metabolic process, hemopoiesis, kidney development, biosynthetic process, regulation of multicellular organism growth, …	TRUE	FALSE	FALSE	FALSE	FALSE	FALSE	FALSE	FALSE	FALSE	FALSE	FALSE	FALSE
ENSG00000166225	FRS2	ventricular septum development, activation of MAPK activity, neuroblast proliferation, gastrulation with mouth forming second, forebrain development, regulation of epithelial cell proliferation, organ induction, anterior/posterior axis specification, embryo, optic placode formation involved in camera-type eye formation, fibroblast growth factor receptor signaling pathway, prostate epithelial cord…	FALSE	FALSE	FALSE	FALSE	FALSE	FALSE	FALSE	FALSE	FALSE	FALSE	FALSE	FALSE
ENSG00000166233	ARIH1	ubiquitin-dependent protein catabolic process, protein ubiquitination, cytokine-mediated signaling pathway, cytoplasm, cytosol, ubiquitin ligase complex, zinc ion binding, protein binding, ubiquitin-protein ligase activity, ubiquitin protein ligase binding, small conjugating protein ligase activity	FALSE	FALSE	FALSE	FALSE	FALSE	FALSE	FALSE	FALSE	FALSE	FALSE	FALSE	FALSE
ENSG00000166348	USP54	ubiquitin-dependent protein catabolic process, protein binding, ubiquitin thiolesterase activity	FALSE	FALSE	FALSE	FALSE	FALSE	FALSE	FALSE	FALSE	FALSE	FALSE	FALSE	FALSE
ENSG00000166401	SERPINB8	regulation of proteolysis, negative regulation of endopeptidase activity, cytosol, protein binding, serine-type endopeptidase inhibitor activity	TRUE	FALSE	FALSE	FALSE	TRUE	FALSE	FALSE	FALSE	FALSE	FALSE	FALSE	FALSE
ENSG00000166479	TMX3	cell redox homeostasis, glycerol ether metabolic process, integral to membrane, endoplasmic reticulum membrane, cell surface, calcium ion binding, electron carrier activity, protein disulfide oxidoreductase activity, protein disulfide isomerase activity, isomerase activity	FALSE	FALSE	FALSE	FALSE	FALSE	FALSE	FALSE	FALSE	FALSE	FALSE	FALSE	FALSE
ENSG00000166526	ZNF3	transcription, DNA-dependent, cell differentiation, multicellular organismal development, regulation of transcription, DNA-dependent, leukocyte activation, nucleus, intracellular, DNA binding, sequence-specific DNA binding transcription factor activity, zinc ion binding, protein binding, nucleic acid binding, identical protein binding	FALSE	FALSE	FALSE	FALSE	FALSE	FALSE	FALSE	FALSE	FALSE	FALSE	FALSE	FALSE
ENSG00000166780	C16orf45	protein binding	TRUE	FALSE	FALSE	FALSE	FALSE	FALSE	FALSE	FALSE	FALSE	FALSE	FALSE	FALSE
ENSG00000166860	ZBTB39	transcription, DNA-dependent, regulation of transcription, DNA-dependent, nucleus, intracellular, DNA binding, zinc ion binding, protein binding	FALSE	FALSE	FALSE	FALSE	FALSE	FALSE	FALSE	FALSE	FALSE	FALSE	FALSE	FALSE
ENSG00000166902	MRPL16	translation, mitochondrion, ribosome, structural constituent of ribosome, rRNA binding	TRUE	FALSE	FALSE	FALSE	FALSE	FALSE	FALSE	FALSE	FALSE	FALSE	FALSE	FALSE
ENSG00000167034	NKX3-1	multicellular organismal development, negative regulation of cell proliferation, positive regulation of transcription, DNA-dependent, heart development, positive regulation of transcription from RNA polymerase II promoter, negative regulation of transcription, DNA-dependent, positive regulation of cell division, regulation of transcription, DNA-dependent, positive regulation of cell proliferation…	TRUE	FALSE	FALSE	FALSE	FALSE	FALSE	FALSE	FALSE	FALSE	FALSE	FALSE	FALSE
ENSG00000167083	GNGT2	G-protein coupled receptor signaling pathway, heterotrimeric G-protein complex, signal transducer activity, phototransduction, synaptic transmission, GTP catabolic process, plasma membrane, extracellular region, GTPase activity	FALSE	FALSE	FALSE	FALSE	FALSE	FALSE	FALSE	FALSE	FALSE	FALSE	FALSE	FALSE
ENSG00000167186	COQ7	oxidation-reduction process, response to drug, in utero embryonic development, age-dependent response to oxidative stress, determination of adult lifespan, cellular response to oxidative stress, mitochondrion morphogenesis, neurogenesis, mitochondrial ATP synthesis coupled electron transport, ubiquinone biosynthetic process, neural tube formation, response to oxidative stress, respiratory electro…	FALSE	FALSE	FALSE	FALSE	FALSE	FALSE	FALSE	FALSE	FALSE	FALSE	FALSE	FALSE
ENSG00000167232	ZNF91	regulation of transcription, DNA-dependent, intracellular, nucleic acid binding, transcription, DNA-dependent, nucleus, DNA binding, sequence-specific DNA binding transcription factor activity, zinc ion binding	TRUE	FALSE	FALSE	FALSE	FALSE	FALSE	FALSE	FALSE	FALSE	FALSE	FALSE	FALSE
ENSG00000167264	DUS2L	tRNA processing, mitochondrion, flavin adenine dinucleotide binding, tRNA dihydrouridine synthase activity, oxidation-reduction process, cytoplasm, intracellular, endoplasmic reticulum, double-stranded RNA binding	TRUE	FALSE	FALSE	FALSE	FALSE	FALSE	FALSE	FALSE	FALSE	FALSE	FALSE	FALSE
ENSG00000167272	POP5	tRNA processing, nucleolar ribonuclease P complex, protein binding, ribonuclease activity, ribonuclease P activity, RNA metabolic process, nucleus	FALSE	FALSE	FALSE	FALSE	FALSE	FALSE	FALSE	FALSE	FALSE	FALSE	FALSE	FALSE
ENSG00000167302	ENTHD2	cytosol, cytoplasmic membrane-bounded vesicle	FALSE	FALSE	FALSE	FALSE	FALSE	FALSE	FALSE	FALSE	FALSE	FALSE	FALSE	FALSE
ENSG00000167378	IRGQ		TRUE	FALSE	FALSE	FALSE	FALSE	FALSE	FALSE	FALSE	FALSE	FALSE	FALSE	FALSE
ENSG00000167468	GPX4	multicellular organismal development, oxidation-reduction process, response to oxidative stress, phospholipid metabolic process, mitochondrion, glutathione peroxidase activity, phospholipid-hydroperoxide glutathione peroxidase activity	TRUE	FALSE	FALSE	FALSE	FALSE	FALSE	FALSE	FALSE	FALSE	FALSE	FALSE	FALSE
ENSG00000167508	MVD	small molecule metabolic process, positive regulation of cell proliferation, isoprenoid biosynthetic process, response to drug, cholesterol biosynthetic process, isopentenyl diphosphate biosynthetic process, mevalonate pathway, cytosol, protein homodimerization activity, ATP binding, Hsp70 protein binding, diphosphomevalonate decarboxylase activity, kinase activity	TRUE	FALSE	FALSE	FALSE	FALSE	FALSE	FALSE	FALSE	FALSE	FALSE	FALSE	FALSE
ENSG00000167528	ZNF641	transcription, DNA-dependent, regulation of transcription, DNA-dependent, nucleus, cytoplasm, intracellular, DNA binding, zinc ion binding, nucleic acid binding	TRUE	FALSE	FALSE	FALSE	FALSE	FALSE	FALSE	FALSE	FALSE	FALSE	FALSE	FALSE
ENSG00000167632	TRAPPC9	cell differentiation, endoplasmic reticulum, Golgi apparatus	TRUE	FALSE	FALSE	FALSE	FALSE	FALSE	FALSE	FALSE	FALSE	FALSE	FALSE	FALSE
ENSG00000167657	DAPK3	transcription, DNA-dependent, apoptotic process, regulation of apoptotic process, induction of apoptosis, regulation of transcription, DNA-dependent, neuron differentiation, protein phosphorylation, positive regulation of canonical Wnt receptor signaling pathway, protein autophosphorylation, chromatin modification, intracellular protein kinase cascade, cytokinesis, regulation of autophagy, regula…	TRUE	FALSE	FALSE	FALSE	FALSE	FALSE	FALSE	FALSE	FALSE	FALSE	FALSE	FALSE
ENSG00000167658	EEF2	translation, gene expression, translational elongation, cellular protein metabolic process, GTP catabolic process, cytosol, ribonucleoprotein complex, polysome, GTP binding, GTPase activity, translation elongation factor activity, protein binding	FALSE	FALSE	FALSE	FALSE	FALSE	FALSE	FALSE	FALSE	FALSE	FALSE	FALSE	FALSE
ENSG00000167671	UBXN6	protein binding, biological_process, nucleus, cellular_component, nucleolus, microtubule organizing center, molecular_function	TRUE	FALSE	FALSE	FALSE	FALSE	FALSE	FALSE	FALSE	FALSE	FALSE	FALSE	FALSE
ENSG00000167693	NXN	cell differentiation, oxidation-reduction process, Wnt receptor signaling pathway, negative regulation of Wnt receptor signaling pathway, cell redox homeostasis, negative regulation of protein ubiquitination, cardiovascular system development, nucleus, cytosol, oxidoreductase activity, antioxidant activity, thioredoxin-disulfide reductase activity, protein-disulfide reductase activity, protein bi…	FALSE	FALSE	FALSE	FALSE	FALSE	FALSE	FALSE	FALSE	FALSE	FALSE	FALSE	FALSE
ENSG00000167740	CYB5D2	nervous system development, extracellular region, heme binding	FALSE	FALSE	FALSE	FALSE	FALSE	FALSE	FALSE	FALSE	FALSE	FALSE	FALSE	FALSE
ENSG00000167778	SPRYD3	protein binding	FALSE	FALSE	FALSE	FALSE	FALSE	FALSE	FALSE	FALSE	FALSE	FALSE	FALSE	FALSE
ENSG00000167967	E4F1	intracellular, zinc ion binding, nucleic acid binding, transcription, DNA-dependent, cell proliferation, protein ubiquitination, negative regulation of transcription from RNA polymerase II promoter, mitosis, cell division, DNA replication, regulation of growth, embryo development, mitotic cell cycle arrest, virus-host interaction, regulation of cell cycle process, regulation of mitotic cell cycle…	FALSE	FALSE	FALSE	FALSE	FALSE	FALSE	FALSE	FALSE	FALSE	FALSE	FALSE	FALSE
ENSG00000167986	DDB1	DNA repair, cell cycle checkpoint, Wnt receptor signaling pathway, protein ubiquitination involved in ubiquitin-dependent protein catabolic process, nucleotide-excision repair, proteasomal ubiquitin-dependent protein catabolic process, virus-host interaction, nucleotide-excision repair, DNA damage removal, nucleus, cytoplasm, nucleoplasm, Cul4-RING ubiquitin ligase complex, Cul4A-RING ubiquitin l…	FALSE	FALSE	FALSE	FALSE	FALSE	FALSE	FALSE	FALSE	FALSE	FALSE	FALSE	FALSE
ENSG00000168005	C11orf84		FALSE	FALSE	FALSE	FALSE	FALSE	FALSE	FALSE	FALSE	FALSE	FALSE	FALSE	FALSE
ENSG00000168026	TTC21A	protein binding	FALSE	FALSE	FALSE	FALSE	FALSE	FALSE	FALSE	FALSE	FALSE	FALSE	FALSE	FALSE
ENSG00000168040	FADD	innate immune response, apoptotic process, regulation of apoptotic process, positive regulation of I-kappaB kinase/NF-kappaB cascade, positive regulation of transcription from RNA polymerase II promoter, signal transduction, positive regulation of apoptotic process, defense response to virus, extrinsic apoptotic signaling pathway via death domain receptors, activation of cysteine-type endopeptida…	TRUE	FALSE	FALSE	FALSE	FALSE	FALSE	FALSE	FALSE	FALSE	FALSE	FALSE	FALSE
ENSG00000168096	ANKS3	protein binding	FALSE	FALSE	FALSE	FALSE	FALSE	FALSE	FALSE	FALSE	FALSE	FALSE	FALSE	FALSE
ENSG00000168101	NUDT16L1	cytoplasm, hydrolase activity	FALSE	FALSE	FALSE	FALSE	FALSE	FALSE	FALSE	FALSE	FALSE	FALSE	FALSE	FALSE
ENSG00000168152	THAP9	nucleic acid binding, DNA binding, metal ion binding	FALSE	FALSE	FALSE	FALSE	FALSE	FALSE	FALSE	FALSE	FALSE	FALSE	FALSE	FALSE
ENSG00000168264	IRF2BP2	transcription, DNA-dependent, regulation of transcription, DNA-dependent, nucleus, cytoplasm, metal ion binding	TRUE	FALSE	FALSE	FALSE	FALSE	FALSE	FALSE	FALSE	FALSE	FALSE	FALSE	FALSE
ENSG00000168297	PXK	inflammatory response, cell communication, protein phosphorylation, negative regulation of ATPase activity, regulation of synaptic transmission, negative regulation of ion transport, nucleus, cytoplasm, plasma membrane, centrosome, protein binding, ATP binding, protein kinase activity, actin binding, protein C-terminus binding, phosphatidylinositol binding, transferase activity, transferring phos…	TRUE	FALSE	FALSE	FALSE	FALSE	FALSE	FALSE	FALSE	FALSE	FALSE	FALSE	FALSE
ENSG00000168393	DTYMK	cell cycle, cell proliferation, small molecule metabolic process, cellular response to growth factor stimulus, dTDP biosynthetic process, nucleobase-containing small molecule metabolic process, nucleobase-containing small molecule interconversion, dTTP biosynthetic process, nucleoside monophosphate phosphorylation, response to cadmium ion, myoblast differentiation, response to estrogen stimulus, …	FALSE	FALSE	FALSE	FALSE	FALSE	FALSE	FALSE	FALSE	FALSE	FALSE	FALSE	FALSE
ENSG00000168411	RFWD3	protein ubiquitination, DNA repair, response to ionizing radiation, mitotic cell cycle G1/S transition DNA damage checkpoint, nucleus, cytoplasm, PML body, zinc ion binding, protein binding, ubiquitin-protein ligase activity, p53 binding, MDM2/MDM4 family protein binding	TRUE	FALSE	FALSE	FALSE	FALSE	FALSE	FALSE	FALSE	FALSE	FALSE	FALSE	FALSE
ENSG00000168495	POLR3D	innate immune response, positive regulation of interferon-beta production, gene expression, transcription from RNA polymerase III promoter, defense response to virus, positive regulation of innate immune response, transcription elongation from RNA polymerase III promoter, termination of RNA polymerase III transcription, nucleoplasm, DNA-directed RNA polymerase III complex, DNA binding, DNA-direct…	FALSE	FALSE	FALSE	FALSE	FALSE	FALSE	FALSE	FALSE	FALSE	FALSE	FALSE	FALSE
ENSG00000168517	HEXIM2	transcription, DNA-dependent, negative regulation of transcription from RNA polymerase II promoter, negative regulation of transcription, DNA-dependent, negative regulation of cyclin-dependent protein kinase activity, nucleus, cytoplasm, protein binding, cyclin-dependent protein kinase inhibitor activity, snRNA binding	FALSE	FALSE	FALSE	FALSE	FALSE	FALSE	FALSE	FALSE	FALSE	FALSE	FALSE	FALSE
ENSG00000168556	ING2	transcription, DNA-dependent, positive regulation of transcription, DNA-dependent, negative regulation of apoptotic process, spermatogenesis, regulation of transcription, DNA-dependent, spermatid development, signal transduction, regulation of growth, male meiosis I, chromatin modification, seminiferous tubule development, sperm motility, positive regulation of transforming growth factor beta rec…	FALSE	FALSE	FALSE	FALSE	FALSE	FALSE	FALSE	FALSE	FALSE	FALSE	FALSE	FALSE
ENSG00000168569	TMEM223	integral to membrane, mitochondrion	FALSE	FALSE	FALSE	FALSE	FALSE	FALSE	FALSE	FALSE	FALSE	FALSE	FALSE	FALSE
ENSG00000168872	DDX19A	protein transport, mRNA transport, response to zinc ion, induction of apoptosis, cytoplasm, nuclear membrane, nuclear pore, RNA binding, ATP binding, nucleic acid binding, ATP-dependent helicase activity, helicase activity	FALSE	FALSE	FALSE	FALSE	FALSE	FALSE	FALSE	FALSE	FALSE	FALSE	FALSE	FALSE
ENSG00000168883	USP39	intracellular, zinc ion binding, ubiquitin-dependent protein catabolic process, ubiquitin thiolesterase activity, mRNA processing, RNA splicing, spliceosomal complex assembly, nucleus	TRUE	FALSE	FALSE	FALSE	FALSE	FALSE	FALSE	FALSE	FALSE	FALSE	FALSE	FALSE
ENSG00000168884	TNIP2	transcription, DNA-dependent, apoptotic process, inflammatory response, positive regulation of I-kappaB kinase/NF-kappaB cascade, positive regulation of transcription from RNA polymerase II promoter, cellular response to lipopolysaccharide, protein stabilization, I-kappaB kinase/NF-kappaB cascade, positive regulation of macrophage activation, toll-like receptor 2 signaling pathway, toll-like rece…	FALSE	FALSE	FALSE	FALSE	FALSE	FALSE	FALSE	FALSE	FALSE	FALSE	FALSE	FALSE
ENSG00000168906	MAT2A	small molecule metabolic process, response to drug, cellular nitrogen compound metabolic process, response to light stimulus, response to cAMP, one-carbon metabolic process, response to hormone stimulus, S-adenosylmethionine biosynthetic process, methanogenesis, circadian rhythm, xenobiotic metabolic process, sulfur amino acid metabolic process, methylation, cytosol, ATP binding, metal ion bindin…	TRUE	FALSE	FALSE	FALSE	FALSE	FALSE	FALSE	FALSE	FALSE	FALSE	FALSE	FALSE
ENSG00000169019	COMMD8	protein binding	TRUE	FALSE	FALSE	FALSE	FALSE	FALSE	FALSE	FALSE	FALSE	FALSE	FALSE	FALSE
ENSG00000169131	ZNF354A	transcription, DNA-dependent, negative regulation of transcription from RNA polymerase II promoter, regulation of transcription, DNA-dependent, response to hypoxia, sensory perception of sound, regulation of transcription from RNA polymerase II promoter, response to folic acid, kidney development, nucleolar fragmentation, intracellular, nucleolus, DNA binding, sequence-specific DNA binding transc…	TRUE	FALSE	FALSE	FALSE	FALSE	FALSE	FALSE	FALSE	FALSE	FALSE	FALSE	FALSE
ENSG00000169299	PGM2	small molecule metabolic process, carbohydrate metabolic process, glucose metabolic process, glycogen biosynthetic process, glycogen catabolic process, carbohydrate catabolic process, deoxyribose phosphate catabolic process, cytosol, magnesium ion binding, intramolecular transferase activity, phosphotransferases, phosphoglucomutase activity, phosphopentomutase activity	TRUE	FALSE	FALSE	FALSE	FALSE	FALSE	FALSE	FALSE	FALSE	FALSE	FALSE	FALSE
ENSG00000169692	AGPAT2	triglyceride biosynthetic process, cellular lipid metabolic process, small molecule metabolic process, metabolic process, phospholipid metabolic process, epidermis development, phosphatidic acid biosynthetic process, glycerophospholipid biosynthetic process, positive regulation of cytokine production, positive regulation of cytokine-mediated signaling pathway, CDP-diacylglycerol biosynthetic proc…	FALSE	FALSE	FALSE	FALSE	FALSE	FALSE	FALSE	FALSE	FALSE	FALSE	FALSE	FALSE
ENSG00000169919	GUSB	small molecule metabolic process, carbohydrate metabolic process, glycosaminoglycan metabolic process, hyaluronan metabolic process, hyaluronan catabolic process, glycosaminoglycan catabolic process, intracellular membrane-bounded organelle, lysosomal lumen, lysosome, hydrolase activity, hydrolyzing O-glycosyl compounds, cation binding, beta-glucuronidase activity	TRUE	FALSE	FALSE	FALSE	FALSE	FALSE	FALSE	FALSE	FALSE	FALSE	FALSE	FALSE
ENSG00000169972	PUSL1	tRNA processing, pseudouridine synthesis, RNA modification, RNA binding, pseudouridine synthase activity	FALSE	FALSE	FALSE	FALSE	FALSE	FALSE	FALSE	FALSE	FALSE	FALSE	FALSE	FALSE
ENSG00000170017	ALCAM	axon guidance, cell adhesion, signal transduction, motor neuron axon guidance, integral to membrane, axon, neuronal cell body, external side of plasma membrane, protein binding, receptor binding, membrane	TRUE	FALSE	FALSE	FALSE	FALSE	FALSE	FALSE	FALSE	FALSE	FALSE	FALSE	FALSE
ENSG00000170035	UBE2E3	regulation of growth, protein K48-linked ubiquitination, protein K11-linked ubiquitination, protein K63-linked ubiquitination, nucleus, cytoplasm, ATP binding, ubiquitin-protein ligase activity, acid-amino acid ligase activity	TRUE	FALSE	FALSE	FALSE	FALSE	FALSE	FALSE	FALSE	FALSE	FALSE	FALSE	FALSE
ENSG00000170088	TMEM192	integral to membrane, late endosome, lysosomal membrane	TRUE	FALSE	FALSE	FALSE	FALSE	FALSE	FALSE	FALSE	FALSE	FALSE	FALSE	FALSE
ENSG00000170190	SLC16A5	transmembrane transport, organic anion transport, monocarboxylic acid transport, integral to membrane, membrane, integral to plasma membrane, symporter activity, secondary active monocarboxylate transmembrane transporter activity, monocarboxylic acid transmembrane transporter activity	FALSE	FALSE	FALSE	FALSE	FALSE	FALSE	FALSE	FALSE	FALSE	FALSE	FALSE	FALSE
ENSG00000170265	ZNF282	transcription, DNA-dependent, negative regulation of transcription, DNA-dependent, regulation of transcription, DNA-dependent, nucleus, intracellular, DNA binding, zinc ion binding, nucleic acid binding	TRUE	FALSE	FALSE	FALSE	FALSE	FALSE	FALSE	FALSE	FALSE	FALSE	FALSE	FALSE
ENSG00000170385	SLC30A1	transmembrane transport, in utero embryonic development, cellular calcium ion homeostasis, cation transport, cellular zinc ion homeostasis, calcium ion import, negative regulation of calcium ion import, negative regulation of neurotransmitter secretion, zinc ion transport, cadmium ion transmembrane transport, detoxification of cadmium ion, negative regulation of zinc ion import, zinc ion transmem…	FALSE	FALSE	FALSE	FALSE	FALSE	FALSE	FALSE	FALSE	FALSE	FALSE	FALSE	FALSE
ENSG00000170448	NFXL1	regulation of transcription, DNA-dependent, integral to membrane, nucleus, sequence-specific DNA binding transcription factor activity, zinc ion binding, protein binding	TRUE	FALSE	FALSE	FALSE	FALSE	FALSE	FALSE	FALSE	FALSE	FALSE	FALSE	FALSE
ENSG00000170581	STAT2	transcription, DNA-dependent, regulation of transcription, DNA-dependent, signal transduction, defense response to virus, regulation of transcription from RNA polymerase II promoter, cytokine-mediated signaling pathway, JAK-STAT cascade, virus-host interaction, type I interferon-mediated signaling pathway, regulation of type I interferon-mediated signaling pathway, nucleus, cytoplasm, plasma memb…	FALSE	FALSE	FALSE	FALSE	FALSE	FALSE	FALSE	FALSE	FALSE	FALSE	FALSE	FALSE
ENSG00000170638	TRABD		TRUE	FALSE	FALSE	FALSE	FALSE	FALSE	FALSE	FALSE	FALSE	FALSE	FALSE	FALSE
ENSG00000170892	TSEN34	tRNA splicing, via endonucleolytic cleavage and ligation, nucleic acid binding, endonuclease activity, tRNA-intron endonuclease activity, mRNA processing, tRNA-type intron splice site recognition and cleavage, nucleolus, tRNA-intron endonuclease complex, protein binding	FALSE	FALSE	FALSE	FALSE	FALSE	FALSE	TRUE	FALSE	FALSE	FALSE	FALSE	FALSE
ENSG00000171055	FEZ2	axon guidance, signal transduction, nervous system development, protein binding	TRUE	FALSE	FALSE	FALSE	FALSE	FALSE	FALSE	FALSE	FALSE	FALSE	FALSE	FALSE
ENSG00000171174	RBKS	D-ribose metabolic process, D-ribose catabolic process, ATP binding, ribokinase activity	FALSE	FALSE	FALSE	FALSE	FALSE	FALSE	FALSE	FALSE	FALSE	FALSE	FALSE	FALSE
ENSG00000171298	GAA	heart morphogenesis, carbohydrate metabolic process, neuromuscular process controlling balance, locomotory behavior, tissue development, muscle cell homeostasis, lysosome organization, regulation of the force of heart contraction, neuromuscular process controlling posture, diaphragm contraction, glycogen catabolic process, catalytic activity, carbohydrate binding, alpha-glucosidase activity, card…	TRUE	FALSE	FALSE	FALSE	FALSE	FALSE	FALSE	FALSE	FALSE	FALSE	FALSE	FALSE
ENSG00000171314	PGAM1	small molecule metabolic process, carbohydrate metabolic process, glycolysis, glucose metabolic process, gluconeogenesis, regulation of glycolysis, respiratory burst, regulation of pentose-phosphate shunt, cytosol, protein kinase binding, intramolecular transferase activity, phosphotransferases, phosphoglycerate mutase activity, bisphosphoglycerate mutase activity, bisphosphoglycerate 2-phosphata…	TRUE	FALSE	FALSE	FALSE	FALSE	FALSE	FALSE	FALSE	FALSE	FALSE	FALSE	FALSE
ENSG00000171488	LRRC8C	integral to membrane, endoplasmic reticulum membrane, protein binding	TRUE	FALSE	FALSE	FALSE	FALSE	FALSE	FALSE	FALSE	FALSE	FALSE	FALSE	FALSE
ENSG00000171603	CLSTN1	homophilic cell adhesion, integral to membrane, nucleus, plasma membrane, extracellular region, endoplasmic reticulum membrane, membrane, Golgi membrane, cell projection, cell junction, postsynaptic membrane, calcium ion binding	FALSE	FALSE	FALSE	FALSE	FALSE	FALSE	FALSE	FALSE	FALSE	FALSE	FALSE	FALSE
ENSG00000171681	ATF7IP	negative regulation of transcription from RNA polymerase II promoter, transcription factor complex, transcription corepressor activity, ATPase activity, transcription, DNA-dependent, positive regulation of transcription, DNA-dependent, negative regulation of transcription, DNA-dependent, DNA methylation, virus-host interaction, regulation of RNA polymerase II transcriptional preinitiation complex…	TRUE	FALSE	FALSE	FALSE	FALSE	FALSE	FALSE	FALSE	FALSE	FALSE	FALSE	FALSE
ENSG00000171703	TCEA2	transcription, DNA-dependent, regulation of transcription, DNA-dependent, regulation of transcription from RNA polymerase II promoter, regulation of DNA-dependent transcription, elongation, DNA-dependent transcription, elongation, nucleus, centrosome, transcription elongation factor complex, DNA binding, zinc ion binding, protein binding, nucleic acid binding, translation elongation factor activi…	TRUE	FALSE	FALSE	FALSE	FALSE	FALSE	FALSE	FALSE	FALSE	FALSE	FALSE	FALSE
ENSG00000171757	LRRC34	protein binding, biological_process, cellular_component, molecular_function	FALSE	FALSE	FALSE	FALSE	FALSE	FALSE	FALSE	FALSE	FALSE	FALSE	FALSE	FALSE
ENSG00000171962	LRRC48	protein binding, cytoplasm	FALSE	FALSE	FALSE	FALSE	FALSE	FALSE	FALSE	FALSE	FALSE	FALSE	FALSE	FALSE
ENSG00000172123	SLFN12	ATP binding	TRUE	FALSE	FALSE	FALSE	FALSE	FALSE	FALSE	FALSE	FALSE	FALSE	FALSE	FALSE
ENSG00000172159	FRMD3	integral to membrane, cytoplasm, cytoskeleton, extrinsic to membrane, cytoskeletal protein binding	TRUE	FALSE	FALSE	FALSE	FALSE	FALSE	FALSE	FALSE	FALSE	FALSE	FALSE	FALSE
ENSG00000172322	CLEC12A	integral to membrane, plasma membrane, carbohydrate binding	TRUE	FALSE	FALSE	FALSE	FALSE	FALSE	FALSE	FALSE	FALSE	FALSE	FALSE	FALSE
ENSG00000172375	C2CD2L	biological_process, integral to membrane, cellular_component, molecular_function, protein binding	TRUE	FALSE	FALSE	FALSE	FALSE	FALSE	FALSE	FALSE	FALSE	FALSE	FALSE	FALSE
ENSG00000172382	PRSS27	proteolysis, extracellular region, plasma membrane, serine-type endopeptidase activity, catalytic activity	FALSE	FALSE	FALSE	FALSE	FALSE	FALSE	FALSE	FALSE	FALSE	FALSE	FALSE	FALSE
ENSG00000172530	BANP	protein localization to nucleus, negative regulation of protein catabolic process, nucleus, p53 binding, , transcription, DNA-dependent, cell cycle, multicellular organismal development, regulation of transcription, DNA-dependent, chromatin modification, DNA binding, protein binding	TRUE	FALSE	FALSE	FALSE	FALSE	FALSE	FALSE	FALSE	FALSE	FALSE	FALSE	FALSE
ENSG00000172578	KLHL6	germinal center formation, B cell receptor signaling pathway, protein binding	FALSE	FALSE	FALSE	FALSE	FALSE	FALSE	FALSE	FALSE	FALSE	FALSE	FALSE	FALSE
ENSG00000172586	CHCHD1	nucleus, cytoplasm, mitochondrion, nucleolus, protein binding	FALSE	FALSE	FALSE	FALSE	FALSE	FALSE	FALSE	FALSE	FALSE	FALSE	FALSE	FALSE
ENSG00000172725	CORO1B	actin cytoskeleton organization, cytoplasm, actin cytoskeleton, protein binding, actin filament binding	FALSE	FALSE	FALSE	FALSE	FALSE	FALSE	FALSE	FALSE	FALSE	FALSE	FALSE	FALSE
ENSG00000172765	TMCC1	integral to membrane	TRUE	FALSE	FALSE	FALSE	FALSE	FALSE	FALSE	FALSE	FALSE	FALSE	FALSE	FALSE
ENSG00000172780	RAB43	small GTPase mediated signal transduction, protein transport, signal transduction, intracellular protein transport, nucleocytoplasmic transport, GTP catabolic process, plasma membrane, intracellular, membrane, GTP binding, GTPase activity	FALSE	FALSE	FALSE	FALSE	FALSE	FALSE	FALSE	FALSE	FALSE	FALSE	FALSE	FALSE
ENSG00000173085	COQ2	integral to membrane, prenyltransferase activity, biosynthetic process, ubiquinone biosynthetic process, isoprenoid biosynthetic process, glycerol metabolic process, mitochondrion, mitochondrial membrane, 4-hydroxybenzoate decaprenyltransferase activity, 4-hydroxybenzoate nonaprenyltransferase activity	TRUE	FALSE	FALSE	FALSE	FALSE	FALSE	FALSE	FALSE	FALSE	FALSE	FALSE	FALSE
ENSG00000173153	ESRRA	transcription, DNA-dependent, positive regulation of transcription from RNA polymerase II promoter, regulation of transcription, DNA-dependent, gene expression, transcription initiation from RNA polymerase II promoter, regulation of osteoclast differentiation, regulation of cell proliferation, cartilage development, regulation of osteoblast differentiation, intracellular receptor mediated signali…	FALSE	FALSE	FALSE	FALSE	FALSE	FALSE	FALSE	FALSE	FALSE	FALSE	FALSE	FALSE
ENSG00000173221	GLRX	small molecule metabolic process, electron transport chain, cell redox homeostasis, nucleobase-containing small molecule metabolic process, nucleobase-containing small molecule interconversion, nucleus, cytosol, mitochondrion, electron carrier activity, protein disulfide oxidoreductase activity, protein N-terminus binding, glutathione disulfide oxidoreductase activity, cytoplasm	TRUE	FALSE	FALSE	FALSE	FALSE	FALSE	FALSE	FALSE	FALSE	FALSE	FALSE	FALSE
ENSG00000173226	IQCB1	cilium assembly, photoreceptor cell maintenance, maintenance of organ identity, photoreceptor outer segment, centrosome, photoreceptor connecting cilium, protein binding, calmodulin binding, binding	TRUE	FALSE	FALSE	FALSE	FALSE	FALSE	FALSE	FALSE	FALSE	FALSE	FALSE	FALSE
ENSG00000173457	PPP1R14B	regulation of phosphorylation, cytoplasm, protein phosphatase inhibitor activity, phosphatase inhibitor activity, protein phosphatase type 1 regulator activity	FALSE	FALSE	FALSE	FALSE	FALSE	FALSE	FALSE	FALSE	FALSE	FALSE	FALSE	FALSE
ENSG00000173473	SMARCC1	transcription, DNA-dependent, positive regulation of transcription, DNA-dependent, positive regulation of transcription from RNA polymerase II promoter, chromatin remodeling, nervous system development, regulation of transcription from RNA polymerase II promoter, insulin receptor signaling pathway, organ morphogenesis, nucleosome disassembly, nucleus, npBAF complex, nBAF complex, SWI/SNF complex,…	FALSE	FALSE	FALSE	FALSE	FALSE	FALSE	FALSE	FALSE	FALSE	FALSE	FALSE	FALSE
ENSG00000173486	FKBP2	protein folding, protein peptidyl-prolyl isomerization, peptidyl-proline modification, endoplasmic reticulum membrane, membrane, endoplasmic reticulum, protein binding, peptidyl-prolyl cis-trans isomerase activity, FK506 binding	FALSE	FALSE	FALSE	FALSE	FALSE	FALSE	FALSE	FALSE	FALSE	FALSE	FALSE	FALSE
ENSG00000173588	CCDC41	biological_process, cellular_component, molecular_function	FALSE	FALSE	FALSE	FALSE	FALSE	FALSE	FALSE	FALSE	FALSE	FALSE	FALSE	FALSE
ENSG00000173812	EIF1	response to stress, regulation of translational initiation, translational initiation, cytoplasm, translation initiation factor activity, translation factor activity, nucleic acid binding	FALSE	FALSE	FALSE	FALSE	FALSE	FALSE	FALSE	FALSE	FALSE	FALSE	FALSE	FALSE
ENSG00000173928	SWSAP1	ATP catabolic process, double-strand break repair via homologous recombination, protein stabilization, nucleus, Shu complex, protein binding, ATPase activity, single-stranded DNA binding	TRUE	FALSE	FALSE	FALSE	FALSE	FALSE	FALSE	FALSE	FALSE	FALSE	FALSE	FALSE
ENSG00000174093		zinc ion binding, metallopeptidase activity, , proteolysis, aminopeptidase activity	FALSE	FALSE	FALSE	FALSE	FALSE	FALSE	FALSE	FALSE	FALSE	FALSE	FALSE	FALSE
ENSG00000174132	FAM174A	integral to membrane	TRUE	FALSE	FALSE	FALSE	FALSE	FALSE	FALSE	FALSE	FALSE	FALSE	FALSE	FALSE
ENSG00000174194	AGAP8	regulation of ARF GTPase activity, zinc ion binding, protein binding, phospholipid binding, ARF GTPase activator activity	TRUE	FALSE	FALSE	FALSE	FALSE	FALSE	FALSE	FALSE	FALSE	FALSE	FALSE	FALSE
ENSG00000174373	RALGAPA1	regulation of small GTPase mediated signal transduction, intracellular, GTPase activator activity, regulation of transcription, DNA-dependent, positive regulation of GTPase activity, activation of Ral GTPase activity, nucleus, cytoplasm, cytosol, mitochondrion, protein heterodimerization activity, binding, Ral GTPase activator activity	TRUE	FALSE	FALSE	FALSE	FALSE	FALSE	FALSE	FALSE	FALSE	FALSE	FALSE	FALSE
ENSG00000174374	WBSCR16	biological_process, cellular_component, mitochondrion	FALSE	FALSE	FALSE	FALSE	FALSE	FALSE	FALSE	FALSE	FALSE	FALSE	FALSE	FALSE
ENSG00000174444	RPL4	translation, viral reproduction, gene expression, RNA metabolic process, mRNA metabolic process, translational elongation, cellular protein metabolic process, SRP-dependent cotranslational protein targeting to membrane, translational initiation, viral infectious cycle, nuclear-transcribed mRNA catabolic process, nonsense-mediated decay, translational termination, viral transcription, nucleus, cyt…	FALSE	FALSE	FALSE	FALSE	FALSE	FALSE	FALSE	FALSE	FALSE	FALSE	TRUE	FALSE
ENSG00000174744	BRMS1	cellular process, , transcription, DNA-dependent, apoptotic process, negative regulation of transcription, DNA-dependent, negative regulation of NF-kappaB transcription factor activity, positive regulation of protein deacetylation, positive regulation of anoikis, nucleus, cytoplasm, protein binding, NF-kappaB binding	FALSE	FALSE	FALSE	FALSE	FALSE	FALSE	FALSE	FALSE	FALSE	FALSE	FALSE	FALSE
ENSG00000174780	SRP72	translation, response to drug, gene expression, cellular protein metabolic process, SRP-dependent cotranslational protein targeting to membrane, cytoplasm, plasma membrane, cytosol, endoplasmic reticulum, nucleolus, signal recognition particle, signal recognition particle, endoplasmic reticulum targeting, protein binding, 7S RNA binding, signal recognition particle binding	TRUE	FALSE	FALSE	FALSE	FALSE	FALSE	TRUE	FALSE	FALSE	FALSE	FALSE	FALSE
ENSG00000174891	RSRC1	response to antibiotic, RNA splicing, protein phosphorylation, nucleocytoplasmic transport, mRNA splicing, via spliceosome, alternative mRNA splicing, via spliceosome, nucleus, cytoplasm, nuclear speck, protein binding	TRUE	FALSE	FALSE	FALSE	FALSE	FALSE	FALSE	FALSE	FALSE	FALSE	FALSE	FALSE
ENSG00000174989	FBXW8	labyrinthine layer blood vessel development, spongiotrophoblast layer development, SCF ubiquitin ligase complex, protein binding	TRUE	FALSE	FALSE	FALSE	FALSE	FALSE	FALSE	FALSE	FALSE	FALSE	FALSE	FALSE
ENSG00000175040	CHST2	multicellular organismal development, inflammatory response, small molecule metabolic process, carbohydrate metabolic process, N-acetylglucosamine metabolic process, glycosaminoglycan metabolic process, keratan sulfate biosynthetic process, keratan sulfate metabolic process, sulfur compound metabolic process, integral to membrane, Golgi membrane, trans-Golgi network, intrinsic to Golgi membrane, …	TRUE	FALSE	FALSE	FALSE	FALSE	FALSE	TRUE	FALSE	FALSE	FALSE	FALSE	FALSE
ENSG00000175137	SH3BP5L		FALSE	FALSE	FALSE	FALSE	FALSE	FALSE	FALSE	FALSE	FALSE	FALSE	FALSE	FALSE
ENSG00000175193	PARL	proteolysis, negative regulation of intrinsic apoptotic signaling pathway, negative regulation of release of cytochrome c from mitochondria, integral to membrane, nucleus, mitochondrion, mitochondrial inner membrane, serine-type endopeptidase activity	TRUE	FALSE	FALSE	FALSE	FALSE	FALSE	FALSE	FALSE	FALSE	FALSE	FALSE	FALSE
ENSG00000175221	MED16	positive regulation of transcription, DNA-dependent, gene expression, transcription initiation from RNA polymerase II promoter, transcription from RNA polymerase II promoter, regulation of transcription from RNA polymerase II promoter, androgen receptor signaling pathway, intracellular steroid hormone receptor signaling pathway, nucleus, mediator complex, nucleoplasm, protein binding, receptor ac…	TRUE	FALSE	FALSE	FALSE	FALSE	FALSE	FALSE	FALSE	FALSE	FALSE	FALSE	FALSE
ENSG00000175265	GOLGA8A	Golgi apparatus, Golgi cisterna membrane	TRUE	FALSE	FALSE	FALSE	FALSE	FALSE	FALSE	FALSE	FALSE	FALSE	FALSE	FALSE
ENSG00000175416	CLTB	intracellular protein transport, vesicle-mediated transport, trans-Golgi network, clathrin coat of trans-Golgi network vesicle, clathrin coat of coated pit, cilium membrane, clathrin coat, plasma membrane part, protein binding, structural molecule activity, magnesium ion binding, peptide binding	FALSE	FALSE	FALSE	FALSE	FALSE	FALSE	FALSE	FALSE	FALSE	FALSE	FALSE	FALSE
ENSG00000175550	DRAP1	transcription, DNA-dependent, negative regulation of transcription from RNA polymerase II promoter, nucleus, intracellular, DNA binding, sequence-specific DNA binding transcription factor activity, transcription corepressor activity, protein heterodimerization activity, sequence-specific DNA binding, transcription factor binding, protein binding	FALSE	FALSE	FALSE	FALSE	FALSE	FALSE	FALSE	FALSE	FALSE	FALSE	FALSE	FALSE
ENSG00000175592	FOSL1	nucleus, DNA binding, negative regulation of cell proliferation, response to virus, regulation of transcription, DNA-dependent, positive regulation of cell proliferation, response to organic cyclic compound, response to drug, positive regulation of apoptotic process, positive regulation of cell cycle, transcription from RNA polymerase II promoter, female pregnancy, response to gravity, response t…	FALSE	FALSE	FALSE	FALSE	FALSE	FALSE	FALSE	FALSE	FALSE	FALSE	FALSE	FALSE
ENSG00000175756	AURKAIP1	positive regulation of proteolysis, negative regulation of mitosis, nucleus, mitochondrion, intracellular membrane-bounded organelle, protein binding	FALSE	FALSE	FALSE	FALSE	FALSE	FALSE	FALSE	FALSE	FALSE	FALSE	FALSE	FALSE
ENSG00000175764	TTLL11	cellular protein modification process, tubulin-tyrosine ligase activity, cilium, microtubule basal body, microtubule severing, protein polyglutamylation	FALSE	FALSE	FALSE	FALSE	FALSE	FALSE	FALSE	FALSE	FALSE	FALSE	FALSE	FALSE
ENSG00000175782	SLC35E3	integral to membrane, membrane	TRUE	FALSE	FALSE	FALSE	FALSE	FALSE	FALSE	FALSE	FALSE	FALSE	FALSE	FALSE
ENSG00000175792	RUVBL1	ATP binding, DNA helicase activity, DNA repair, DNA recombination, nucleus, cytoplasm, intracellular membrane-bounded organelle, Golgi apparatus, nucleotide binding, nucleoside-triphosphatase activity, four-way junction helicase activity, transcription, DNA-dependent, mitosis, spermatogenesis, cell division, nucleosome assembly, regulation of growth, regulation of transcription from RNA polymeras…	FALSE	FALSE	FALSE	FALSE	FALSE	FALSE	FALSE	FALSE	FALSE	FALSE	FALSE	FALSE
ENSG00000175806	MSRA	oxidation-reduction process, response to oxidative stress, cellular protein modification process, aging, protein metabolic process, methionine metabolic process, nucleus, mitochondrion, membrane, peptide-methionine (S)-S-oxide reductase activity, oxidoreductase activity, acting on a sulfur group of donors, disulfide as acceptor	TRUE	FALSE	FALSE	FALSE	FALSE	FALSE	FALSE	FALSE	FALSE	FALSE	FALSE	FALSE
ENSG00000175938	ORAI3	integral to membrane, protein binding	FALSE	FALSE	FALSE	FALSE	FALSE	FALSE	FALSE	FALSE	FALSE	FALSE	FALSE	FALSE
ENSG00000176101	SSNA1	mitotic cell cycle, G2/M transition of mitotic cell cycle, intraflagellar transport, ciliary receptor clustering involved in smoothened signaling pathway, nucleus, cytosol, centrosome, identical protein binding	TRUE	FALSE	FALSE	FALSE	FALSE	FALSE	FALSE	FALSE	FALSE	FALSE	FALSE	FALSE
ENSG00000176108	CHMP6	protein transport, cellular membrane organization, endosomal transport, cytosol, late endosome membrane, endomembrane system, protein N-terminus binding	TRUE	FALSE	FALSE	FALSE	FALSE	FALSE	FALSE	FALSE	FALSE	FALSE	FALSE	FALSE
ENSG00000176124	DLEU1	protein binding	FALSE	FALSE	FALSE	FALSE	FALSE	FALSE	FALSE	FALSE	FALSE	FALSE	FALSE	FALSE
ENSG00000176148	TCP11L1	microtubule	TRUE	FALSE	FALSE	FALSE	FALSE	FALSE	FALSE	FALSE	FALSE	FALSE	FALSE	FALSE
ENSG00000176248	ANAPC2	ubiquitin-dependent protein catabolic process, mitosis, cell division, mitotic cell cycle, cell cycle checkpoint, anaphase-promoting complex-dependent proteasomal ubiquitin-dependent protein catabolic process, positive regulation of ubiquitin-protein ligase activity involved in mitotic cell cycle, regulation of ubiquitin-protein ligase activity involved in mitotic cell cycle, regulation of cyclin…	FALSE	FALSE	FALSE	FALSE	FALSE	FALSE	FALSE	FALSE	FALSE	FALSE	FALSE	FALSE
ENSG00000176393	RNPEP	proteolysis, retina development in camera-type eye, leukotriene biosynthetic process, aging, negative regulation of blood pressure, plasma membrane, extracellular region, extracellular space, Golgi apparatus, external side of plasma membrane, secretory granule, zinc ion binding, copper ion binding, aminopeptidase activity, metallopeptidase activity, peptide binding, metalloexopeptidase activity, …	TRUE	FALSE	FALSE	FALSE	FALSE	FALSE	FALSE	FALSE	FALSE	FALSE	FALSE	FALSE
ENSG00000176396	EID2	transcription, DNA-dependent, cell differentiation, negative regulation of transcription, DNA-dependent, negative regulation of transforming growth factor beta receptor signaling pathway, regulation of cell proliferation, regulation of transforming growth factor beta receptor signaling pathway, muscle organ development, transforming growth factor beta receptor complex assembly, SMAD protein compl…	FALSE	FALSE	FALSE	FALSE	FALSE	FALSE	FALSE	FALSE	FALSE	FALSE	FALSE	FALSE
ENSG00000176595	KBTBD11	protein binding	TRUE	FALSE	FALSE	FALSE	FALSE	FALSE	FALSE	FALSE	FALSE	FALSE	FALSE	FALSE
ENSG00000176783	RUFY1	regulation of endocytosis, endocytosis, protein transport, early endosome membrane, cytoplasm, zinc ion binding, protein binding, metal ion binding, lipid binding, protein transporter activity	TRUE	FALSE	FALSE	FALSE	FALSE	FALSE	FALSE	FALSE	FALSE	FALSE	FALSE	FALSE
ENSG00000176834	VSIG10	integral to membrane, protein binding	TRUE	FALSE	FALSE	FALSE	FALSE	FALSE	FALSE	FALSE	FALSE	FALSE	FALSE	FALSE
ENSG00000176871	WSB2	protein ubiquitination, intracellular signal transduction, intracellular, protein binding	TRUE	FALSE	FALSE	FALSE	FALSE	FALSE	FALSE	FALSE	FALSE	FALSE	FALSE	FALSE
ENSG00000176973	FAM89B		TRUE	FALSE	FALSE	FALSE	FALSE	FALSE	FALSE	FALSE	FALSE	FALSE	FALSE	FALSE
ENSG00000177000	MTHFR	oxidation-reduction process, small molecule metabolic process, cellular amino acid metabolic process, methionine biosynthetic process, blood circulation, vitamin metabolic process, water-soluble vitamin metabolic process, tetrahydrofolate interconversion, folic acid metabolic process, homocysteine metabolic process, methionine metabolic process, cytosol, modified amino acid binding, methylenetetr…	TRUE	FALSE	FALSE	FALSE	FALSE	FALSE	FALSE	FALSE	FALSE	FALSE	FALSE	FALSE
ENSG00000177054	ZDHHC13	positive regulation of I-kappaB kinase/NF-kappaB cascade, signal transduction, magnesium ion transport, integral to membrane, Golgi membrane, intracellular membrane-bounded organelle, Golgi apparatus, Golgi-associated vesicle membrane, zinc ion binding, protein binding, signal transducer activity, magnesium ion transmembrane transporter activity, palmitoyltransferase activity	TRUE	FALSE	FALSE	FALSE	FALSE	FALSE	FALSE	FALSE	FALSE	FALSE	FALSE	FALSE
ENSG00000177096	FAM109B	retrograde transport, endosome to Golgi, endosome organization, receptor recycling, Golgi apparatus, trans-Golgi network, early endosome, recycling endosome, clathrin-coated vesicle, protein homodimerization activity, protein binding, phospholipid binding	FALSE	FALSE	FALSE	FALSE	FALSE	FALSE	FALSE	FALSE	FALSE	FALSE	FALSE	FALSE
ENSG00000177294	FBXO39		TRUE	FALSE	FALSE	FALSE	FALSE	FALSE	FALSE	FALSE	FALSE	FALSE	FALSE	FALSE
ENSG00000177427	SMCR7	mitochondrion organization, integral to membrane, mitochondrial outer membrane, protein binding	TRUE	FALSE	FALSE	FALSE	FALSE	FALSE	FALSE	FALSE	FALSE	FALSE	FALSE	FALSE
ENSG00000177432	NAP1L5	nucleosome assembly, nucleus	FALSE	FALSE	FALSE	FALSE	FALSE	FALSE	FALSE	FALSE	FALSE	FALSE	FALSE	FALSE
ENSG00000177733	HNRNPA0	inflammatory response, response to lipopolysaccharide, gene expression, mRNA processing, RNA splicing, mRNA splicing, via spliceosome, 3'-UTR-mediated mRNA stabilization, nucleus, nucleoplasm, ribonucleoprotein complex, nucleotide binding, RNA binding, nucleic acid binding, protein kinase binding, AU-rich element binding	FALSE	FALSE	FALSE	FALSE	FALSE	FALSE	FALSE	FALSE	FALSE	FALSE	FALSE	FALSE
ENSG00000177917	ARL6IP6	integral to membrane, protein binding	FALSE	FALSE	FALSE	FALSE	FALSE	FALSE	FALSE	FALSE	FALSE	FALSE	FALSE	FALSE
ENSG00000177954	RPS27	cell proliferation, translation, mitotic cell cycle, viral reproduction, gene expression, RNA metabolic process, mRNA metabolic process, translational elongation, cellular protein metabolic process, mitotic prometaphase, M phase of mitotic cell cycle, SRP-dependent cotranslational protein targeting to membrane, translational initiation, viral infectious cycle, nuclear-transcribed mRNA catabolic p…	FALSE	FALSE	FALSE	FALSE	FALSE	FALSE	FALSE	FALSE	FALSE	FALSE	FALSE	FALSE
ENSG00000178026	FAM211B		FALSE	FALSE	FALSE	FALSE	FALSE	FALSE	FALSE	FALSE	FALSE	FALSE	FALSE	FALSE
ENSG00000178096	BOLA1	extracellular region, mitochondrion	FALSE	FALSE	FALSE	FALSE	FALSE	FALSE	FALSE	FALSE	FALSE	FALSE	FALSE	FALSE
ENSG00000178163	ZNF518B	transcription, DNA-dependent, regulation of transcription, DNA-dependent, nucleus, intracellular, DNA binding, zinc ion binding	TRUE	FALSE	FALSE	FALSE	FALSE	FALSE	FALSE	FALSE	FALSE	FALSE	FALSE	FALSE
ENSG00000178234	GALNT11	O-glycan processing, cellular protein metabolic process, post-translational protein modification, integral to membrane, Golgi membrane, carbohydrate binding, polypeptide N-acetylgalactosaminyltransferase activity, , transferase activity, carbohydrate metabolic process, Golgi apparatus, transferase activity, transferring glycosyl groups	TRUE	FALSE	FALSE	FALSE	FALSE	FALSE	FALSE	FALSE	FALSE	FALSE	FALSE	FALSE
ENSG00000178381	ZFAND2A	nucleus, cytoplasm, zinc ion binding	TRUE	FALSE	FALSE	FALSE	FALSE	FALSE	FALSE	FALSE	FALSE	FALSE	FALSE	FALSE
ENSG00000178409	BEND3		FALSE	FALSE	FALSE	FALSE	FALSE	FALSE	FALSE	FALSE	FALSE	FALSE	FALSE	FALSE
ENSG00000178585	CTNNBIP1	negative regulation of transcription from RNA polymerase II promoter, negative regulation of sequence-specific DNA binding transcription factor activity, Wnt receptor signaling pathway, negative regulation of Wnt receptor signaling pathway, branching involved in ureteric bud morphogenesis, negative regulation of DNA binding, negative regulation of smooth muscle cell proliferation, anterior/poster…	TRUE	FALSE	FALSE	FALSE	FALSE	FALSE	FALSE	FALSE	FALSE	FALSE	FALSE	FALSE
ENSG00000178685	PARP10	nucleus, Golgi apparatus, nucleotide binding, NAD+ ADP-ribosyltransferase activity, negative regulation of fibroblast proliferation, protein poly-ADP-ribosylation, regulation of chromatin assembly, cytoplasm, protein binding	TRUE	FALSE	FALSE	FALSE	FALSE	FALSE	FALSE	FALSE	FALSE	FALSE	FALSE	FALSE
ENSG00000178694	NSUN3	methyltransferase activity	FALSE	FALSE	FALSE	FALSE	FALSE	FALSE	FALSE	FALSE	FALSE	FALSE	FALSE	FALSE
ENSG00000178802	MPI	carbohydrate metabolic process, GDP-mannose biosynthetic process, zinc ion binding, mannose-6-phosphate isomerase activity, cellular protein metabolic process, protein N-linked glycosylation via asparagine, dolichol-linked oligosaccharide biosynthetic process, post-translational protein modification, cytoplasm, cytosol	FALSE	FALSE	FALSE	FALSE	FALSE	FALSE	FALSE	FALSE	FALSE	FALSE	FALSE	FALSE
ENSG00000178803	ADORA2A-AS1		FALSE	FALSE	FALSE	FALSE	FALSE	FALSE	FALSE	FALSE	FALSE	FALSE	FALSE	FALSE
ENSG00000178878	APOLD1	cell differentiation, angiogenesis, response to hypoxia, lipid transport, lipoprotein metabolic process, endothelial cell activation, regulation of endothelial cell differentiation, integral to membrane, plasma membrane, extracellular region, lipid binding	TRUE	FALSE	FALSE	FALSE	FALSE	FALSE	FALSE	FALSE	FALSE	FALSE	FALSE	FALSE
ENSG00000178904	DPY19L3	integral to membrane	TRUE	FALSE	FALSE	FALSE	FALSE	FALSE	FALSE	FALSE	FALSE	FALSE	FALSE	FALSE
ENSG00000179104	TMTC2	integral to membrane, endoplasmic reticulum, protein binding, identical protein binding	TRUE	FALSE	FALSE	FALSE	FALSE	FALSE	FALSE	FALSE	FALSE	FALSE	FALSE	FALSE
ENSG00000179152	TCAIM	mitochondrion	TRUE	FALSE	FALSE	FALSE	FALSE	FALSE	FALSE	FALSE	FALSE	FALSE	FALSE	FALSE
ENSG00000179344	HLA-DQB1	protein binding, antigen processing and presentation of peptide or polysaccharide antigen via MHC class II, immune response, antigen processing and presentation, integral to membrane, membrane, MHC class II protein complex	TRUE	FALSE	FALSE	FALSE	FALSE	FALSE	FALSE	FALSE	FALSE	FALSE	FALSE	FALSE
ENSG00000179583	CIITA	transcription, DNA-dependent, negative regulation of transcription from RNA polymerase II promoter, positive regulation of transcription, DNA-dependent, positive regulation of transcription from RNA polymerase II promoter, negative regulation of transcription, DNA-dependent, immune response, response to antibiotic, cytokine-mediated signaling pathway, response to interferon-gamma, interferon-gamm…	FALSE	FALSE	FALSE	FALSE	FALSE	FALSE	FALSE	FALSE	FALSE	FALSE	FALSE	FALSE
ENSG00000179632	MAF1	transcription, DNA-dependent, negative regulation of transcription from RNA polymerase III promoter, nucleus, cytoplasm, intracellular, inhibitory synapse, dendrite, axon, cytosol, plasma membrane, RNA polymerase III type 1 promoter DNA binding, RNA polymerase III type 2 promoter DNA binding, RNA polymerase III type 3 promoter DNA binding	TRUE	FALSE	FALSE	FALSE	FALSE	FALSE	FALSE	FALSE	FALSE	FALSE	FALSE	FALSE
ENSG00000179979	CRIPAK	response to estrogen stimulus, negative regulation of protein kinase activity, regulation of cytoskeleton organization, negative regulation of intracellular estrogen receptor signaling pathway, nucleus, cytoplasm, plasma membrane, endoplasmic reticulum, protein binding	TRUE	FALSE	FALSE	FALSE	FALSE	FALSE	FALSE	FALSE	FALSE	FALSE	FALSE	FALSE
ENSG00000180233	ZNRF2	plasma membrane, cell junction, endosome membrane, presynaptic membrane, lysosomal membrane, zinc ion binding, protein binding, ligase activity	FALSE	FALSE	FALSE	FALSE	FALSE	FALSE	FALSE	FALSE	FALSE	FALSE	FALSE	FALSE
ENSG00000180336	C17orf104		TRUE	FALSE	FALSE	FALSE	FALSE	FALSE	FALSE	FALSE	FALSE	FALSE	FALSE	FALSE
ENSG00000180425	C11orf71		FALSE	FALSE	FALSE	FALSE	FALSE	FALSE	FALSE	FALSE	FALSE	FALSE	FALSE	FALSE
ENSG00000180758	GPR157	G-protein coupled receptor signaling pathway, cell surface receptor signaling pathway, integral to membrane, plasma membrane, membrane, G-protein coupled receptor activity, transmembrane signaling receptor activity	TRUE	FALSE	FALSE	FALSE	FALSE	FALSE	FALSE	FALSE	FALSE	FALSE	FALSE	FALSE
ENSG00000180776	ZDHHC20	integral to membrane, zinc ion binding, transferase activity, transferring acyl groups, transferase activity	TRUE	FALSE	FALSE	FALSE	FALSE	FALSE	FALSE	FALSE	FALSE	FALSE	FALSE	FALSE
ENSG00000180957	PITPNB	small molecule metabolic process, lipid metabolic process, transport, in utero embryonic development, phospholipid metabolic process, glycerophospholipid biosynthetic process, phospholipid transport, intracellular, endoplasmic reticulum membrane, Golgi membrane, lipid binding, phosphatidylinositol transporter activity	FALSE	FALSE	FALSE	FALSE	FALSE	FALSE	FALSE	FALSE	FALSE	FALSE	FALSE	FALSE
ENSG00000181038	METTL23	integral to membrane, methyltransferase activity	TRUE	FALSE	FALSE	FALSE	FALSE	FALSE	FALSE	FALSE	FALSE	FALSE	FALSE	FALSE
ENSG00000181467	RAP2B	small GTPase mediated signal transduction, protein transport, signal transduction, negative regulation of cell migration, GTP catabolic process, positive regulation of protein autophosphorylation, Rap protein signal transduction, regulation of protein tyrosine kinase activity, cytosol, intracellular, membrane, recycling endosome membrane, recycling endosome, GTP binding, protein domain specific b…	FALSE	FALSE	FALSE	FALSE	FALSE	FALSE	FALSE	FALSE	FALSE	FALSE	FALSE	FALSE
ENSG00000181924	COA4		FALSE	FALSE	FALSE	FALSE	FALSE	FALSE	FALSE	FALSE	FALSE	FALSE	FALSE	FALSE
ENSG00000182141	ZNF708	transcription, DNA-dependent, regulation of transcription, DNA-dependent, nucleus, intracellular, DNA binding, zinc ion binding, nucleic acid binding	TRUE	FALSE	FALSE	FALSE	FALSE	FALSE	FALSE	FALSE	FALSE	FALSE	FALSE	FALSE
ENSG00000182150	ERCC6L2	DNA repair, nucleus, microtubule organizing center, DNA binding, ATP binding, nucleic acid binding, hydrolase activity, ATP-dependent helicase activity, helicase activity	TRUE	FALSE	FALSE	FALSE	FALSE	FALSE	FALSE	FALSE	FALSE	FALSE	FALSE	FALSE
ENSG00000182197	EXT1	axon guidance, olfactory bulb development, small molecule metabolic process, skeletal system development, signal transduction, carbohydrate metabolic process, protein glycosylation, gastrulation, ossification, glycosaminoglycan biosynthetic process, mesoderm development, glycosaminoglycan metabolic process, heparan sulfate proteoglycan biosynthetic process, endoderm development, embryonic skeleta…	FALSE	FALSE	FALSE	FALSE	FALSE	FALSE	FALSE	FALSE	FALSE	FALSE	FALSE	FALSE
ENSG00000182500	ORAI1	positive regulation of calcium ion transport, blood coagulation, regulation of calcium ion transport, store-operated calcium entry, integral to plasma membrane, protein complex, protein binding, store-operated calcium channel activity	FALSE	FALSE	FALSE	FALSE	FALSE	FALSE	FALSE	FALSE	FALSE	FALSE	FALSE	FALSE
ENSG00000182534	MXRA7	integral to membrane	TRUE	FALSE	FALSE	FALSE	FALSE	FALSE	FALSE	FALSE	FALSE	FALSE	FALSE	FALSE
ENSG00000182544	MFSD5	transmembrane transport, transport, integral to membrane	TRUE	FALSE	FALSE	FALSE	FALSE	FALSE	FALSE	FALSE	FALSE	FALSE	FALSE	FALSE
ENSG00000182568	SATB1	transcription, DNA-dependent, apoptotic process, negative regulation of transcription from RNA polymerase II promoter, regulation of transcription, DNA-dependent, chromatin remodeling, epidermis development, histone methylation, CD4-positive, alpha-beta T cell differentiation, CD8-positive, alpha-beta T cell differentiation, activated T cell proliferation, reflex, chromatin organization, virus-ho…	TRUE	FALSE	FALSE	FALSE	FALSE	FALSE	FALSE	FALSE	FALSE	FALSE	FALSE	FALSE
ENSG00000182749	PAQR7	cell differentiation, multicellular organismal development, oogenesis, integral to membrane, plasma membrane, steroid binding	FALSE	FALSE	FALSE	FALSE	FALSE	TRUE	FALSE	FALSE	FALSE	FALSE	FALSE	FALSE
ENSG00000182903	ZNF721	regulation of transcription, DNA-dependent, intracellular, nucleic acid binding, transcription, DNA-dependent, nucleus, DNA binding, zinc ion binding	TRUE	FALSE	FALSE	FALSE	FALSE	FALSE	FALSE	FALSE	FALSE	FALSE	FALSE	FALSE
ENSG00000182909	LENG9	RNA metabolic process, intracellular, zinc ion binding, nucleic acid binding, catalytic activity	FALSE	FALSE	FALSE	FALSE	FALSE	FALSE	FALSE	FALSE	FALSE	FALSE	FALSE	FALSE
ENSG00000182952	HMGN4	nucleus, chromatin, nucleosomal DNA binding	TRUE	FALSE	FALSE	FALSE	FALSE	FALSE	FALSE	FALSE	FALSE	FALSE	FALSE	FALSE
ENSG00000183354	KIAA2026	protein binding	TRUE	FALSE	FALSE	FALSE	FALSE	FALSE	FALSE	FALSE	FALSE	FALSE	FALSE	FALSE
ENSG00000183386	FHL3	actin cytoskeleton organization, muscle organ development, nucleus, stress fiber, Z disc, zinc ion binding, actin binding	TRUE	FALSE	FALSE	FALSE	FALSE	FALSE	FALSE	FALSE	FALSE	FALSE	FALSE	FALSE
ENSG00000183431	SF3A3	gene expression, mRNA processing, RNA splicing, mRNA splicing, via spliceosome, RNA splicing, via transesterification reactions, mRNA 3'-splice site recognition, nucleus, nucleoplasm, spliceosomal complex, nuclear speck, catalytic step 2 spliceosome, zinc ion binding, protein binding, nucleic acid binding	TRUE	FALSE	FALSE	FALSE	FALSE	FALSE	FALSE	FALSE	FALSE	FALSE	FALSE	FALSE
ENSG00000183598	HIST2H3D	nucleosome assembly, blood coagulation, extracellular region, nucleosome, nucleoplasm, DNA binding, protein binding, protein heterodimerization activity	FALSE	FALSE	FALSE	FALSE	FALSE	FALSE	FALSE	FALSE	FALSE	FALSE	FALSE	FALSE
ENSG00000183684	ALYREF	gene expression, RNA splicing, transcription from RNA polymerase II promoter, mRNA export from nucleus, mRNA splicing, via spliceosome, termination of RNA polymerase II transcription, mRNA 3'-end processing, intronless viral mRNA export from host nucleus, nucleus, cytosol, nucleoplasm, nuclear speck, catalytic step 2 spliceosome, transcription export complex, nucleotide binding, RNA binding, prot…	FALSE	FALSE	FALSE	FALSE	FALSE	FALSE	FALSE	FALSE	FALSE	FALSE	FALSE	FALSE
ENSG00000183696	UPP1	nucleoside metabolic process, nucleotide catabolic process, pyrimidine nucleotide metabolic process, uridine metabolic process, cytoplasm, catalytic activity, uridine phosphorylase activity, small molecule metabolic process, nucleobase-containing compound metabolic process, pyrimidine nucleobase metabolic process, pyrimidine nucleoside salvage, nucleobase-containing small molecule metabolic proce…	TRUE	FALSE	FALSE	FALSE	FALSE	FALSE	FALSE	FALSE	FALSE	FALSE	FALSE	FALSE
ENSG00000183955	SETD8	transcription, DNA-dependent, negative regulation of transcription from RNA polymerase II promoter, mitosis, cell division, negative regulation of transcription, DNA-dependent, histone lysine methylation, peptidyl-lysine monomethylation, regulation of DNA damage response, signal transduction by p53 class mediator, nucleus, chromosome, protein binding, transcription corepressor activity, histone-l…	TRUE	FALSE	FALSE	FALSE	FALSE	FALSE	FALSE	FALSE	FALSE	FALSE	FALSE	FALSE
ENSG00000184056	VPS33B	protein transport, vesicle-mediated transport, vesicle docking involved in exocytosis, melanosome localization, cellular membrane fusion, lysosome localization, platelet alpha granule organization, cytoplasm, perinuclear region of cytoplasm, lysosome, late endosome membrane, late endosome, lysosomal membrane, platelet alpha granule, HOPS complex, protein binding	TRUE	FALSE	FALSE	FALSE	FALSE	FALSE	FALSE	FALSE	FALSE	FALSE	FALSE	FALSE
ENSG00000184207	PGP	carbohydrate metabolic process, metabolic process, catalytic activity, hydrolase activity, phosphatase activity, phosphoglycolate phosphatase activity	FALSE	FALSE	FALSE	FALSE	FALSE	FALSE	FALSE	FALSE	FALSE	FALSE	FALSE	FALSE
ENSG00000184281	TSSC4		FALSE	FALSE	FALSE	FALSE	FALSE	FALSE	FALSE	FALSE	FALSE	FALSE	FALSE	FALSE
ENSG00000184384	MAML2	positive regulation of transcription from RNA polymerase II promoter, gene expression, transcription initiation from RNA polymerase II promoter, Notch signaling pathway, nucleus, Golgi apparatus, nucleoplasm, nuclear speck, transcription coactivator activity	FALSE	FALSE	FALSE	FALSE	FALSE	FALSE	FALSE	FALSE	FALSE	FALSE	FALSE	FALSE
ENSG00000184635	ZNF93	regulation of transcription, DNA-dependent, intracellular, nucleic acid binding, zinc ion binding, transcription, DNA-dependent, nucleus, DNA binding, sequence-specific DNA binding transcription factor activity	TRUE	FALSE	FALSE	FALSE	FALSE	FALSE	FALSE	FALSE	FALSE	FALSE	FALSE	FALSE
ENSG00000184708	EIF4ENIF1	nucleus, cytosol, intracellular membrane-bounded organelle, translation initiation factor activity, cytoplasm, PML body, nuclear speck, protein binding, protein transporter activity	TRUE	FALSE	FALSE	FALSE	FALSE	FALSE	FALSE	FALSE	FALSE	FALSE	FALSE	FALSE
ENSG00000184719	RNLS	oxidation-reduction process, extracellular region, oxidoreductase activity	FALSE	FALSE	FALSE	FALSE	FALSE	FALSE	FALSE	FALSE	FALSE	FALSE	FALSE	FALSE
ENSG00000184988	TMEM106A	biological_process, integral to membrane, cellular_component, molecular_function	FALSE	FALSE	FALSE	FALSE	FALSE	FALSE	FALSE	FALSE	FALSE	FALSE	FALSE	FALSE
ENSG00000184990	SIVA1	apoptotic process, induction of apoptosis, response to virus, negative regulation of NF-kappaB transcription factor activity, virus-host interaction, activation of cysteine-type endopeptidase activity involved in apoptotic process by cytochrome c, activation-induced cell death of T cells, nucleus, cytoplasm, mitochondrion, nucleoplasm, zinc ion binding, protein binding, metal ion binding, viral r…	TRUE	FALSE	FALSE	FALSE	FALSE	FALSE	FALSE	FALSE	FALSE	FALSE	FALSE	FALSE
ENSG00000184992	BRI3BP	integral to membrane, mitochondrial outer membrane	TRUE	FALSE	FALSE	FALSE	FALSE	FALSE	FALSE	FALSE	FALSE	FALSE	FALSE	FALSE
ENSG00000185000	DGAT1	triglyceride biosynthetic process, cellular lipid metabolic process, small molecule metabolic process, triglyceride metabolic process, phospholipid metabolic process, insulin secretion, lipid storage, diacylglycerol metabolic process, glycerophospholipid biosynthetic process, phosphorylation, acylglycerol acyl-chain remodeling, long-chain fatty-acyl-CoA metabolic process, very-low-density lipopro…	TRUE	FALSE	FALSE	FALSE	FALSE	FALSE	FALSE	FALSE	FALSE	FALSE	FALSE	FALSE
ENSG00000185009	AP3M1	transport, intracellular protein transport, vesicle-mediated transport, protein targeting to lysosome, anterograde axon cargo transport, anterograde synaptic vesicle transport, Golgi apparatus, lysosome, clathrin adaptor complex, protein binding	TRUE	FALSE	FALSE	FALSE	FALSE	FALSE	FALSE	FALSE	FALSE	FALSE	FALSE	FALSE
ENSG00000185527	PDE6G	visual perception, activation of MAPK activity, negative regulation of catalytic activity, blood coagulation, positive regulation of epidermal growth factor receptor signaling pathway, positive regulation of G-protein coupled receptor protein signaling pathway, cytosol, 3',5'-cyclic-nucleotide phosphodiesterase activity, cGMP binding, 3',5'-cyclic-GMP phosphodiesterase activity, enzyme inhibitor …	FALSE	FALSE	FALSE	FALSE	FALSE	FALSE	FALSE	FALSE	FALSE	FALSE	FALSE	FALSE
ENSG00000185619	PCGF3	transcription, DNA-dependent, regulation of transcription, DNA-dependent, nucleus, PcG protein complex, zinc ion binding, protein binding	TRUE	FALSE	FALSE	FALSE	FALSE	FALSE	FALSE	FALSE	FALSE	FALSE	FALSE	FALSE
ENSG00000185651	UBE2L3	transcription, DNA-dependent, cell proliferation, ubiquitin-dependent protein catabolic process, protein ubiquitination, protein polyubiquitination, protein transport, cellular protein modification process, regulation of transcription, DNA-dependent, cellular response to glucocorticoid stimulus, protein K11-linked ubiquitination, cellular response to steroid hormone stimulus, regulation of S phas…	TRUE	FALSE	FALSE	FALSE	FALSE	FALSE	FALSE	FALSE	FALSE	FALSE	FALSE	FALSE
ENSG00000185745	IFIT1	response to virus, negative regulation of viral genome replication, defense response to virus, cytokine-mediated signaling pathway, negative regulation of protein binding, regulation of defense response to virus, cellular response to type I interferon, cellular response to exogenous dsRNA, positive regulation of viral genome replication, type I interferon-mediated signaling pathway, negative regu…	FALSE	FALSE	FALSE	FALSE	FALSE	FALSE	FALSE	FALSE	FALSE	FALSE	FALSE	FALSE
ENSG00000185829	ARL17A	small GTPase mediated signal transduction, protein transport, vesicle-mediated transport, intracellular, Golgi apparatus, GTP binding	TRUE	FALSE	FALSE	FALSE	FALSE	FALSE	FALSE	FALSE	FALSE	FALSE	FALSE	FALSE
ENSG00000185896	LAMP1	autophagy, autophagic cell death, membrane, sarcolemma, lysosome, endosome membrane, integral to plasma membrane, neuronal cell body, melanosome, external side of plasma membrane, dendrite, multivesicular body, late endosome, lysosomal membrane, lamellar body, alveolar lamellar body, cytoplasmic vesicle, cell surface, vesicle, endosome, protein binding	FALSE	FALSE	FALSE	FALSE	FALSE	FALSE	FALSE	FALSE	FALSE	FALSE	FALSE	FALSE
ENSG00000185900		transferase activity, transferring phosphorus-containing groups, protein phosphorylation, brain development, neuron migration, neuromuscular process, sensory perception of pain, learning or memory, integral to membrane, ATP binding, protein kinase activity	FALSE	FALSE	FALSE	FALSE	FALSE	FALSE	FALSE	FALSE	FALSE	FALSE	FALSE	FALSE
ENSG00000185909	KLHDC8B	cytoplasm, protein binding	TRUE	FALSE	FALSE	FALSE	FALSE	FALSE	FALSE	FALSE	FALSE	FALSE	FALSE	FALSE
ENSG00000186104	CYP2R1	oxidation-reduction process, heme binding, monooxygenase activity, iron ion binding, electron carrier activity, oxidoreductase activity, acting on paired donors, with incorporation or reduction of molecular oxygen, small molecule metabolic process, response to ionizing radiation, vitamin D metabolic process, response to cesium ion, xenobiotic metabolic process, steroid metabolic process, vitamin …	FALSE	FALSE	FALSE	FALSE	FALSE	FALSE	FALSE	FALSE	FALSE	FALSE	FALSE	FALSE
ENSG00000186153	WWOX	apoptotic process, oxidation-reduction process, induction of apoptosis, positive regulation of transcription from RNA polymerase II promoter, cellular response to transforming growth factor beta stimulus, metabolic process, Wnt receptor signaling pathway, negative regulation of Wnt receptor signaling pathway, positive regulation of apoptotic process, skeletal system morphogenesis, osteoblast diff…	FALSE	FALSE	FALSE	FALSE	FALSE	FALSE	FALSE	FALSE	FALSE	FALSE	FALSE	FALSE
ENSG00000186187	ZNRF1	proteasomal ubiquitin-dependent protein catabolic process, protein K48-linked ubiquitination, cell junction, lysosome, synaptic vesicle membrane, endosome, zinc ion binding, protein binding, ubiquitin-protein ligase activity	TRUE	FALSE	FALSE	FALSE	FALSE	FALSE	FALSE	FALSE	FALSE	FALSE	FALSE	FALSE
ENSG00000186298	PPP1CC	cell division, small molecule metabolic process, lipid metabolic process, mitotic cell cycle, glycogen metabolic process, protein dephosphorylation, mitotic prometaphase, transforming growth factor beta receptor signaling pathway, negative regulation of transforming growth factor beta receptor signaling pathway, M phase of mitotic cell cycle, regulation of nucleocytoplasmic transport, triglycerid…	TRUE	FALSE	FALSE	FALSE	FALSE	FALSE	FALSE	FALSE	FALSE	FALSE	FALSE	FALSE
ENSG00000186352	ANKRD37	nucleus, cytoplasm, protein binding	FALSE	FALSE	FALSE	FALSE	FALSE	FALSE	FALSE	FALSE	FALSE	FALSE	FALSE	FALSE
ENSG00000186792	HYAL3	inflammatory response, response to virus, response to antibiotic, carbohydrate metabolic process, cartilage development, hyaluronan catabolic process, cellular response to interleukin-1, cellular response to tumor necrosis factor, cellular response to UV-B, extracellular region, lysosome, cytoplasmic vesicle, hyalurononglucosaminidase activity, hyaluronoglucuronidase activity	FALSE	FALSE	FALSE	FALSE	FALSE	FALSE	FALSE	FALSE	FALSE	FALSE	FALSE	FALSE
ENSG00000186814	ZSCAN30	transcription, DNA-dependent, regulation of transcription, DNA-dependent, viral reproduction, nucleus, intracellular, DNA binding, sequence-specific DNA binding transcription factor activity, zinc ion binding	TRUE	FALSE	FALSE	FALSE	FALSE	FALSE	FALSE	FALSE	FALSE	FALSE	FALSE	FALSE
ENSG00000186866	POFUT2	fucose metabolic process, protein O-linked fucosylation, regulation of secretion, endoplasmic reticulum, Golgi apparatus, peptide-O-fucosyltransferase activity, regulation of gene expression, mesoderm formation, fucosylation, regulation of epithelial to mesenchymal transition, fucosyltransferase activity	FALSE	FALSE	FALSE	FALSE	FALSE	FALSE	FALSE	FALSE	FALSE	FALSE	FALSE	FALSE
ENSG00000187049	TMEM216	cilium assembly, cilium morphogenesis, integral to membrane, cilium, microtubule basal body, TCTN-B9D complex, ciliary transition zone	FALSE	FALSE	FALSE	FALSE	FALSE	FALSE	FALSE	FALSE	FALSE	FALSE	FALSE	FALSE
ENSG00000187066			FALSE	FALSE	FALSE	FALSE	FALSE	FALSE	FALSE	FALSE	FALSE	FALSE	FALSE	FALSE
ENSG00000187109	NAP1L1	positive regulation of cell proliferation, nucleosome assembly, DNA replication, nucleus, melanosome, chromatin assembly complex, protein binding	TRUE	FALSE	FALSE	FALSE	FALSE	FALSE	FALSE	FALSE	FALSE	FALSE	FALSE	FALSE
ENSG00000187514	PTMA	nucleus, cytoplasm, transcription, DNA-dependent	FALSE	FALSE	FALSE	FALSE	FALSE	FALSE	FALSE	FALSE	FALSE	FALSE	FALSE	FALSE
ENSG00000187608	ISG15	innate immune response, cell-cell signaling, defense response to virus, cytokine-mediated signaling pathway, negative regulation of type I interferon production, modification-dependent protein catabolic process, ISG15-protein conjugation, virus-host interaction, type I interferon-mediated signaling pathway, cytoplasm, cytosol, extracellular space, protein binding, protein tag	FALSE	FALSE	FALSE	FALSE	FALSE	FALSE	FALSE	FALSE	FALSE	FALSE	FALSE	FALSE
ENSG00000187626	ZKSCAN4	transcription, DNA-dependent, regulation of transcription, DNA-dependent, viral reproduction, nucleus, intracellular, DNA binding, sequence-specific DNA binding transcription factor activity, zinc ion binding, nucleic acid binding	TRUE	FALSE	FALSE	FALSE	FALSE	FALSE	FALSE	FALSE	FALSE	FALSE	FALSE	FALSE
ENSG00000187860	CCDC157	vesicle-mediated transport, membrane	FALSE	FALSE	FALSE	FALSE	FALSE	FALSE	FALSE	FALSE	FALSE	FALSE	FALSE	FALSE
ENSG00000188186	LAMTOR4	cellular response to amino acid stimulus, regulation of cell size, positive regulation of TOR signaling cascade, protein localization to lysosome, lysosome, Ragulator complex, guanyl-nucleotide exchange factor activity, protein complex scaffold	TRUE	FALSE	FALSE	FALSE	FALSE	FALSE	TRUE	FALSE	FALSE	FALSE	FALSE	FALSE
ENSG00000188234	AGAP4	regulation of ARF GTPase activity, zinc ion binding, protein binding, phospholipid binding, ARF GTPase activator activity	FALSE	FALSE	FALSE	FALSE	FALSE	FALSE	FALSE	FALSE	FALSE	FALSE	FALSE	FALSE
ENSG00000188290	HES4	transcription, DNA-dependent, regulation of transcription, DNA-dependent, nucleus, DNA binding, protein dimerization activity, cell differentiation, nervous system development, transcription factor binding	TRUE	FALSE	FALSE	FALSE	FALSE	FALSE	FALSE	FALSE	FALSE	FALSE	FALSE	FALSE
ENSG00000188342	GTF2F2	positive regulation of transcription from RNA polymerase II promoter, viral reproduction, gene expression, RNA splicing, transcription initiation from RNA polymerase II promoter, transcription from RNA polymerase II promoter, transcription elongation from RNA polymerase II promoter, 7-methylguanosine mRNA capping, mRNA splicing, via spliceosome, positive regulation of viral transcription, nucleus…	TRUE	FALSE	FALSE	FALSE	FALSE	FALSE	FALSE	FALSE	FALSE	FALSE	FALSE	FALSE
ENSG00000188352	FOCAD	integral to membrane, focal adhesion, protein binding, binding	FALSE	FALSE	FALSE	FALSE	FALSE	FALSE	FALSE	FALSE	FALSE	FALSE	FALSE	FALSE
ENSG00000188542	DUSP28	protein dephosphorylation, peptidyl-tyrosine dephosphorylation, dephosphorylation, protein tyrosine phosphatase activity, protein tyrosine/serine/threonine phosphatase activity, phosphatase activity	FALSE	FALSE	FALSE	FALSE	FALSE	FALSE	FALSE	FALSE	FALSE	FALSE	FALSE	FALSE
ENSG00000188549	C15orf52		FALSE	FALSE	FALSE	FALSE	FALSE	FALSE	FALSE	FALSE	FALSE	FALSE	FALSE	FALSE
ENSG00000188613	NANOS1	RNA binding, zinc ion binding, cell migration, negative regulation of translation, epithelial cell migration, cytoplasm, perinuclear region of cytoplasm, protein binding, translation repressor activity	FALSE	FALSE	FALSE	FALSE	FALSE	FALSE	FALSE	FALSE	FALSE	FALSE	FALSE	FALSE
ENSG00000188690	UROS	small molecule metabolic process, porphyrin-containing compound metabolic process, response to antibiotic, cellular response to arsenic-containing substance, tetrapyrrole biosynthetic process, cellular response to amine stimulus, heme biosynthetic process, protoporphyrinogen IX biosynthetic process, uroporphyrinogen III biosynthetic process, porphyrin-containing compound biosynthetic process, cyt…	FALSE	FALSE	FALSE	FALSE	FALSE	FALSE	FALSE	FALSE	FALSE	FALSE	FALSE	FALSE
ENSG00000188735	TMEM120B	biological_process, integral to membrane, cellular_component, molecular_function	FALSE	FALSE	FALSE	FALSE	FALSE	FALSE	FALSE	FALSE	FALSE	FALSE	FALSE	FALSE
ENSG00000188986	COBRA1	negative regulation of transcription, DNA-dependent, viral reproduction, gene expression, transcription from RNA polymerase II promoter, transcription elongation from RNA polymerase II promoter, positive regulation of viral transcription, nucleus, cytoplasm, nucleoplasm, NELF complex, protein binding	TRUE	FALSE	FALSE	FALSE	FALSE	FALSE	FALSE	FALSE	FALSE	FALSE	FALSE	FALSE
ENSG00000189046	ALKBH2	oxidation-reduction process, DNA repair, oxidative demethylation, DNA dealkylation involved in DNA repair, DNA demethylation, oxidative DNA demethylation, nucleoplasm, oxidoreductase activity, oxidoreductase activity, acting on single donors with incorporation of molecular oxygen, incorporation of two atoms of oxygen, oxidoreductase activity, acting on paired donors, with incorporation or reducti…	FALSE	FALSE	FALSE	FALSE	FALSE	FALSE	FALSE	FALSE	FALSE	FALSE	FALSE	FALSE
ENSG00000196116	TDRD7	spermatogenesis, germ cell development, lens morphogenesis in camera-type eye, lens fiber cell differentiation, posttranscriptional regulation of gene expression, cytoplasm, mitochondrial matrix, chromatoid body, P granule, ribonucleoprotein granule, ribonucleoprotein complex, protein binding, mRNA binding, protein N-terminus binding	FALSE	FALSE	FALSE	FALSE	FALSE	FALSE	FALSE	FALSE	FALSE	FALSE	FALSE	FALSE
ENSG00000196126	HLA-DRB1	negative regulation of interferon-gamma production, immune response, antigen processing and presentation, protein tetramerization, negative regulation of T cell proliferation, cytokine-mediated signaling pathway, T cell receptor signaling pathway, inflammatory response to antigenic stimulus, interferon-gamma-mediated signaling pathway, T cell costimulation, immunoglobulin production involved in i…	TRUE	FALSE	FALSE	FALSE	FALSE	FALSE	FALSE	FALSE	FALSE	FALSE	FALSE	FALSE
ENSG00000196150	ZNF250	regulation of transcription, DNA-dependent, intracellular, nucleic acid binding, transcription, DNA-dependent, nucleus, DNA binding, zinc ion binding	TRUE	FALSE	FALSE	FALSE	FALSE	FALSE	FALSE	FALSE	FALSE	FALSE	FALSE	FALSE
ENSG00000196236	XPNPEP3	proteolysis, glomerular filtration, cellular process, protein processing, mitochondrion, aminopeptidase activity, metallopeptidase activity, manganese ion binding	TRUE	FALSE	FALSE	FALSE	FALSE	FALSE	FALSE	FALSE	FALSE	FALSE	FALSE	FALSE
ENSG00000196247	ZNF107	biological_process, transcription, DNA-dependent, regulation of transcription, DNA-dependent, nucleus, cellular_component, intracellular, molecular_function, DNA binding, zinc ion binding	TRUE	FALSE	FALSE	FALSE	FALSE	FALSE	FALSE	FALSE	FALSE	FALSE	FALSE	FALSE
ENSG00000196312	HIATL2	transmembrane transport, integral to membrane, transporter activity	FALSE	FALSE	FALSE	FALSE	FALSE	FALSE	FALSE	FALSE	FALSE	FALSE	FALSE	FALSE
ENSG00000196366	C9orf163		FALSE	FALSE	FALSE	FALSE	FALSE	FALSE	FALSE	FALSE	FALSE	FALSE	FALSE	FALSE
ENSG00000196419	XRCC6	transcription, DNA-dependent, positive regulation of transcription, DNA-dependent, positive regulation of transcription from RNA polymerase II promoter, negative regulation of transcription, DNA-dependent, DNA repair, viral reproduction, double-strand break repair via nonhomologous end joining, telomere maintenance, double-strand break repair, response to ionizing radiation, positive regulation o…	FALSE	FALSE	FALSE	FALSE	FALSE	FALSE	FALSE	FALSE	FALSE	FALSE	FALSE	FALSE
ENSG00000196458	ZNF605	transcription, DNA-dependent, regulation of transcription, DNA-dependent, nucleus, intracellular, DNA binding, zinc ion binding, nucleic acid binding	TRUE	FALSE	FALSE	FALSE	FALSE	FALSE	FALSE	FALSE	FALSE	FALSE	FALSE	FALSE
ENSG00000196497	IPO4	protein transport, intracellular protein transport, cytoplasm, nuclear pore, protein binding, protein transporter activity, binding, intracellular	TRUE	FALSE	FALSE	FALSE	FALSE	FALSE	FALSE	FALSE	FALSE	FALSE	FALSE	FALSE
ENSG00000196511	TPK1	small molecule metabolic process, thiamine diphosphate biosynthetic process, thiamine metabolic process, vitamin metabolic process, water-soluble vitamin metabolic process, thiamine-containing compound metabolic process, cytoplasm, cytosol, ATP binding, kinase activity, thiamine diphosphokinase activity	TRUE	FALSE	FALSE	FALSE	FALSE	FALSE	FALSE	FALSE	FALSE	FALSE	FALSE	FALSE
ENSG00000196531	NACA	protein binding, transcription, DNA-dependent, protein transport, translation, virus-host interaction, nucleus, cytoplasm, nascent polypeptide-associated complex, DNA binding	FALSE	FALSE	FALSE	FALSE	FALSE	FALSE	FALSE	FALSE	FALSE	FALSE	FALSE	FALSE
ENSG00000196544	C17orf59	protein binding	FALSE	FALSE	FALSE	FALSE	FALSE	FALSE	FALSE	FALSE	FALSE	FALSE	FALSE	FALSE
ENSG00000196743	GM2A	small molecule metabolic process, neuromuscular process controlling balance, phospholipid metabolic process, sphingolipid metabolic process, learning or memory, lipid storage, glycosphingolipid metabolic process, ganglioside catabolic process, oligosaccharide catabolic process, sphingolipid catabolic process, glycolipid catabolic process, positive regulation of catalytic activity, neurological sy…	TRUE	FALSE	FALSE	FALSE	FALSE	FALSE	FALSE	FALSE	FALSE	FALSE	FALSE	FALSE
ENSG00000196812	ZSCAN16	transcription, DNA-dependent, regulation of transcription, DNA-dependent, viral reproduction, nucleus, intracellular, DNA binding, sequence-specific DNA binding transcription factor activity, zinc ion binding	TRUE	FALSE	FALSE	FALSE	FALSE	FALSE	FALSE	FALSE	FALSE	FALSE	FALSE	FALSE
ENSG00000196966	HIST1H3E	nucleosome assembly, blood coagulation, regulation of gene silencing, S phase, extracellular region, nucleosome, nucleoplasm, DNA binding, protein binding, protein heterodimerization activity	TRUE	FALSE	FALSE	FALSE	FALSE	FALSE	FALSE	FALSE	FALSE	FALSE	FALSE	FALSE
ENSG00000197008	ZNF138	transcription, DNA-dependent, regulation of transcription, DNA-dependent, nucleus, intracellular, DNA binding, sequence-specific DNA binding transcription factor activity, zinc ion binding, nucleic acid binding	TRUE	FALSE	FALSE	FALSE	FALSE	FALSE	FALSE	FALSE	FALSE	FALSE	FALSE	FALSE
ENSG00000197024	ZNF398	transcription, DNA-dependent, positive regulation of transcription, DNA-dependent, regulation of transcription, DNA-dependent, nucleus, intracellular, DNA binding, zinc ion binding, nucleic acid binding	FALSE	FALSE	FALSE	FALSE	FALSE	FALSE	FALSE	FALSE	FALSE	FALSE	FALSE	FALSE
ENSG00000197070	ARRDC1	vacuolar transport, retromer complex	TRUE	FALSE	FALSE	FALSE	FALSE	FALSE	FALSE	FALSE	FALSE	FALSE	FALSE	FALSE
ENSG00000197114	ZGPAT	transcription, DNA-dependent, negative regulation of transcription, DNA-dependent, negative regulation of epidermal growth factor-activated receptor activity, nucleus, sequence-specific DNA binding transcription factor activity, zinc ion binding, protein binding, nucleic acid binding, sequence-specific DNA binding	FALSE	FALSE	FALSE	FALSE	FALSE	FALSE	FALSE	FALSE	FALSE	FALSE	FALSE	FALSE
ENSG00000197142	ACSL5	regulation of apoptotic process, triglyceride biosynthetic process, long-chain fatty-acyl-CoA biosynthetic process, cellular lipid metabolic process, small molecule metabolic process, metabolic process, response to sucrose stimulus, cellular response to insulin stimulus, response to glucose stimulus, response to nutrient, positive regulation of triglyceride biosynthetic process, fatty acid transp…	TRUE	FALSE	FALSE	FALSE	FALSE	FALSE	FALSE	FALSE	FALSE	FALSE	FALSE	FALSE
ENSG00000197147	LRRC8B	integral to membrane, protein binding	TRUE	FALSE	FALSE	FALSE	FALSE	FALSE	FALSE	FALSE	FALSE	FALSE	FALSE	FALSE
ENSG00000197157	SND1	transcription, DNA-dependent, regulation of transcription, DNA-dependent, gene silencing by RNA, virus-host interaction, nucleus, cytoplasm, mitochondrion, melanosome, RNA-induced silencing complex, nucleic acid binding, hydrolase activity, acting on ester bonds, nuclease activity, transcription cofactor activity, protein binding	TRUE	FALSE	FALSE	FALSE	FALSE	FALSE	FALSE	FALSE	FALSE	FALSE	FALSE	FALSE
ENSG00000197182			FALSE	FALSE	FALSE	FALSE	FALSE	FALSE	FALSE	FALSE	FALSE	FALSE	FALSE	FALSE
ENSG00000197448	GSTK1	intracellular membrane-bounded organelle, protein disulfide oxidoreductase activity, glutathione metabolic process, intracellular, mitochondrial inner membrane, peroxisome, receptor binding, glutathione transferase activity, glutathione peroxidase activity, mitochondrion, mitochondrial matrix	FALSE	FALSE	FALSE	FALSE	FALSE	FALSE	FALSE	FALSE	FALSE	FALSE	FALSE	FALSE
ENSG00000197766	CFD	proteolysis, complement activation, innate immune response, Notch signaling pathway, platelet activation, blood coagulation, platelet degranulation, complement activation, alternative pathway, extracellular region, extracellular space, platelet alpha granule lumen, serine-type endopeptidase activity, catalytic activity, serine-type peptidase activity	TRUE	FALSE	FALSE	FALSE	FALSE	FALSE	FALSE	FALSE	FALSE	FALSE	FALSE	FALSE
ENSG00000197837	HIST4H4	DNA-dependent transcription, initiation, phosphatidylinositol-mediated signaling, nucleosome assembly, telomere maintenance, chromatin organization, CenH3-containing nucleosome assembly at centromere, negative regulation of megakaryocyte differentiation, nucleus, extracellular region, nucleolus, nucleosome, nucleoplasm, actin cytoskeleton, DNA binding, protein binding, protein heterodimerization …	TRUE	FALSE	FALSE	FALSE	FALSE	FALSE	FALSE	FALSE	FALSE	FALSE	FALSE	FALSE
ENSG00000197846	HIST1H2BF	nucleosome assembly, defense response to bacterium, nucleus, intracellular, nucleosome, DNA binding, protein heterodimerization activity, sequence-specific DNA binding	FALSE	FALSE	FALSE	FALSE	FALSE	FALSE	FALSE	FALSE	FALSE	FALSE	FALSE	FALSE
ENSG00000197930	ERO1L	oxidation-reduction process, protein folding, cellular protein modification process, electron transport chain, chaperone mediated protein folding requiring cofactor, brown fat cell differentiation, protein thiol-disulfide exchange, release of sequestered calcium ion into cytosol, endoplasmic reticulum unfolded protein response, intrinsic apoptotic signaling pathway in response to endoplasmic reti…	TRUE	FALSE	FALSE	FALSE	FALSE	FALSE	FALSE	FALSE	FALSE	FALSE	FALSE	FALSE
ENSG00000198018	ENTPD7	integral to membrane, cytoplasmic vesicle membrane, hydrolase activity	FALSE	FALSE	FALSE	FALSE	FALSE	FALSE	FALSE	FALSE	FALSE	FALSE	FALSE	FALSE
ENSG00000198176	TFDP1	transcription, DNA-dependent, cell proliferation, positive regulation of transcription from RNA polymerase II promoter, regulation of transcription, DNA-dependent, mitotic cell cycle, gene expression, transcription initiation from RNA polymerase II promoter, regulation of transcription from RNA polymerase II promoter, transforming growth factor beta receptor signaling pathway, G1/S transition of …	FALSE	FALSE	FALSE	FALSE	FALSE	FALSE	FALSE	FALSE	FALSE	FALSE	FALSE	FALSE
ENSG00000198276	UCKL1	metabolic process, virus-host interaction, UMP salvage, CTP salvage, nucleus, endoplasmic reticulum, protein binding, ATP binding, transferase activity, kinase activity, phosphotransferase activity, alcohol group as acceptor, uridine kinase activity	FALSE	FALSE	FALSE	FALSE	FALSE	FALSE	FALSE	FALSE	FALSE	FALSE	FALSE	FALSE
ENSG00000198298	ZNF485	transcription, DNA-dependent, regulation of transcription, DNA-dependent, nucleus, intracellular, DNA binding, zinc ion binding, nucleic acid binding	FALSE	FALSE	FALSE	FALSE	FALSE	FALSE	FALSE	FALSE	FALSE	FALSE	FALSE	FALSE
ENSG00000198363	ASPH	biological_process, negative regulation of cell proliferation, positive regulation of transcription, DNA-dependent, pattern specification process, regulation of release of sequestered calcium ion into cytosol by sarcoplasmic reticulum, cellular response to calcium ion, negative regulation of ryanodine-sensitive calcium-release channel activity, face morphogenesis, palate development, muscle contr…	TRUE	FALSE	FALSE	FALSE	FALSE	FALSE	FALSE	FALSE	FALSE	FALSE	FALSE	FALSE
ENSG00000198502	HLA-DRB5	immune response, antigen processing and presentation, cytokine-mediated signaling pathway, T cell receptor signaling pathway, interferon-gamma-mediated signaling pathway, T cell costimulation, antigen processing and presentation of exogenous peptide antigen via MHC class II, plasma membrane, membrane, Golgi membrane, MHC class II protein complex, late endosome membrane, trans-Golgi network membra…	TRUE	FALSE	FALSE	FALSE	FALSE	FALSE	FALSE	FALSE	FALSE	FALSE	FALSE	FALSE
ENSG00000198556	ZNF789	transcription, DNA-dependent, regulation of transcription, DNA-dependent, nucleus, intracellular, DNA binding, zinc ion binding, nucleic acid binding	FALSE	FALSE	FALSE	FALSE	FALSE	FALSE	FALSE	FALSE	FALSE	FALSE	FALSE	FALSE
ENSG00000198624	CCDC69	endoplasmic reticulum	TRUE	FALSE	FALSE	FALSE	FALSE	FALSE	FALSE	FALSE	FALSE	FALSE	FALSE	FALSE
ENSG00000198673	FAM19A2	cytoplasm	TRUE	FALSE	FALSE	FALSE	FALSE	FALSE	FALSE	FALSE	FALSE	FALSE	FALSE	FALSE
ENSG00000198715	C1orf85	positive regulation of transcription from RNA polymerase II promoter, intracellular receptor mediated signaling pathway, integral to membrane, nucleus, cytosol, lysosome, lysosomal membrane, sequence-specific DNA binding transcription factor activity, ligand-activated sequence-specific DNA binding RNA polymerase II transcription factor activity, transcription regulatory region DNA binding, protei…	TRUE	FALSE	FALSE	FALSE	FALSE	FALSE	FALSE	FALSE	FALSE	FALSE	FALSE	FALSE
ENSG00000198783	ZNF830	mitosis, cell division, blastocyst growth, cell cycle, nucleus, cytoplasm, zinc ion binding, nucleic acid binding, metal ion binding	TRUE	FALSE	FALSE	FALSE	FALSE	FALSE	FALSE	FALSE	FALSE	FALSE	TRUE	FALSE
ENSG00000198793	MTOR	response to insulin stimulus, cellular response to hypoxia, positive regulation of actin filament polymerization, peptidyl-threonine phosphorylation, positive regulation of endothelial cell proliferation, positive regulation of protein kinase B signaling cascade, regulation of glycogen biosynthetic process, germ cell development, positive regulation of lamellipodium assembly, negative regulation …	TRUE	FALSE	FALSE	FALSE	FALSE	FALSE	FALSE	FALSE	FALSE	FALSE	FALSE	FALSE
ENSG00000198804	MT-CO1	oxidation-reduction process, small molecule metabolic process, response to oxidative stress, response to copper ion, aging, respiratory electron transport chain, response to electrical stimulus, aerobic respiration, cerebellum development, mitochondrial electron transport, cytochrome c to oxygen, integral to membrane, mitochondrial inner membrane, respiratory chain, protein binding, heme binding,…	FALSE	FALSE	FALSE	FALSE	FALSE	FALSE	FALSE	FALSE	FALSE	FALSE	FALSE	FALSE
ENSG00000198870	C9orf96	protein phosphorylation, ATP binding, protein kinase activity, protein tyrosine kinase activity, transferase activity, transferring phosphorus-containing groups, binding, kinase activity	FALSE	FALSE	FALSE	FALSE	FALSE	FALSE	FALSE	FALSE	FALSE	FALSE	FALSE	FALSE
ENSG00000198873	GRK5	kinase activity, apoptotic process, negative regulation of apoptotic process, signal transduction, response to drug, termination of G-protein coupled receptor signaling pathway, Wnt receptor signaling pathway, protein phosphorylation, adenylate cyclase-modulating G-protein coupled receptor signaling pathway, regulation of G-protein coupled receptor protein signaling pathway, protein autophosphory…	TRUE	FALSE	FALSE	FALSE	FALSE	FALSE	FALSE	FALSE	FALSE	FALSE	FALSE	FALSE
ENSG00000198938	MT-CO3	small molecule metabolic process, respiratory electron transport chain, mitochondrial electron transport, cytochrome c to oxygen, aerobic electron transport chain, integral to membrane, membrane, mitochondrial inner membrane, cytochrome-c oxidase activity, heme-copper terminal oxidase activity	FALSE	FALSE	FALSE	FALSE	FALSE	FALSE	FALSE	FALSE	FALSE	FALSE	FALSE	FALSE
ENSG00000198964	SGMS1	apoptotic process, negative regulation of apoptotic process, inflammatory response, small molecule metabolic process, phospholipid metabolic process, cell growth, cellular response to lipopolysaccharide, sphingolipid metabolic process, positive regulation of gene expression, cellular response to tumor necrosis factor, sphingolipid biosynthetic process, sphingomyelin biosynthetic process, integral…	TRUE	FALSE	FALSE	FALSE	FALSE	FALSE	FALSE	FALSE	FALSE	FALSE	FALSE	FALSE
ENSG00000203705	TATDN3	mitochondrion, endodeoxyribonuclease activity, producing 5'-phosphomonoesters, nucleus, metal ion binding	TRUE	FALSE	FALSE	FALSE	FALSE	FALSE	FALSE	FALSE	FALSE	FALSE	FALSE	FALSE
ENSG00000203811	HIST2H3C	nucleosome assembly, blood coagulation, extracellular region, nucleosome, nucleoplasm, DNA binding, protein binding, protein heterodimerization activity	FALSE	FALSE	FALSE	FALSE	FALSE	FALSE	FALSE	FALSE	FALSE	FALSE	FALSE	FALSE
ENSG00000203836	NBPF24	cytoplasm	FALSE	FALSE	FALSE	FALSE	FALSE	FALSE	FALSE	FALSE	FALSE	FALSE	FALSE	FALSE
ENSG00000203852	HIST2H3A	nucleosome assembly, blood coagulation, extracellular region, nucleosome, nucleoplasm, DNA binding, protein binding, protein heterodimerization activity	FALSE	FALSE	FALSE	FALSE	FALSE	FALSE	FALSE	FALSE	FALSE	FALSE	FALSE	FALSE
ENSG00000204149	AGAP6	regulation of ARF GTPase activity, zinc ion binding, protein binding, phospholipid binding, ARF GTPase activator activity	TRUE	FALSE	FALSE	FALSE	FALSE	FALSE	FALSE	FALSE	FALSE	FALSE	FALSE	FALSE
ENSG00000204161	C10orf128	integral to membrane	TRUE	FALSE	FALSE	FALSE	FALSE	FALSE	FALSE	FALSE	FALSE	FALSE	FALSE	FALSE
ENSG00000204169	AGAP7	regulation of ARF GTPase activity, zinc ion binding, protein binding, phospholipid binding, ARF GTPase activator activity	TRUE	FALSE	FALSE	FALSE	FALSE	FALSE	FALSE	FALSE	FALSE	FALSE	FALSE	FALSE
ENSG00000204220	PFDN6	protein folding, cellular protein metabolic process, 'de novo' posttranslational protein folding, chaperone-mediated protein complex assembly, prefoldin complex, chaperone binding, unfolded protein binding, protein binding	FALSE	FALSE	FALSE	FALSE	FALSE	FALSE	FALSE	FALSE	FALSE	FALSE	FALSE	FALSE
ENSG00000204257	HLA-DMA	protein binding, antigen processing and presentation of peptide or polysaccharide antigen via MHC class II, immune response, antigen processing and presentation, integral to membrane, membrane, MHC class II protein complex, protein transport, chaperone mediated protein folding requiring cofactor, protein complex assembly, positive thymic T cell selection, immunoglobulin mediated immune response, …	TRUE	FALSE	FALSE	FALSE	FALSE	FALSE	FALSE	FALSE	FALSE	FALSE	FALSE	FALSE
ENSG00000204348	DOM3Z	nucleotide binding, metal ion binding	FALSE	FALSE	FALSE	FALSE	FALSE	FALSE	FALSE	FALSE	FALSE	FALSE	FALSE	FALSE
ENSG00000204356	RDBP	biological_process, negative regulation of transcription elongation from RNA polymerase II promoter, viral reproduction, gene expression, transcription from RNA polymerase II promoter, transcription elongation from RNA polymerase II promoter, positive regulation of viral transcription, nucleus, mitochondrion, nucleoplasm, NELF complex, nucleotide binding, RNA binding, protein binding, nucleic aci…	FALSE	FALSE	FALSE	FALSE	FALSE	FALSE	FALSE	FALSE	FALSE	FALSE	FALSE	FALSE
ENSG00000204439	C6orf47		TRUE	FALSE	FALSE	FALSE	FALSE	FALSE	FALSE	FALSE	FALSE	FALSE	FALSE	FALSE
ENSG00000204520	MICA	regulation of immune response, plasma membrane, protein binding, immune response, antigen processing and presentation, membrane, MHC class I protein complex	TRUE	FALSE	FALSE	FALSE	FALSE	FALSE	FALSE	FALSE	FALSE	FALSE	FALSE	FALSE
ENSG00000204576	PRR3	zinc ion binding, nucleic acid binding	FALSE	FALSE	FALSE	FALSE	FALSE	FALSE	FALSE	FALSE	FALSE	FALSE	FALSE	FALSE
ENSG00000204590	GNL1	signal transduction, ribosome biogenesis, response to DNA damage stimulus, GTP catabolic process, T cell mediated immunity, cytosol, extracellular space, structural molecule activity, GTP binding, GTPase activity	FALSE	FALSE	FALSE	FALSE	FALSE	FALSE	FALSE	FALSE	FALSE	FALSE	FALSE	FALSE
ENSG00000204628	GNB2L1	protein binding, negative regulation of translation, small ribosomal subunit, neuronal cell body, dendrite, protein kinase C binding, ion channel inhibitor activity, cell cycle, negative regulation of cell growth, negative regulation of Wnt receptor signaling pathway, positive regulation of apoptotic process, regulation of cell cycle, positive regulation of cell migration, positive regulation of …	TRUE	FALSE	FALSE	FALSE	FALSE	FALSE	FALSE	FALSE	FALSE	FALSE	FALSE	FALSE
ENSG00000204713	TRIM27	protein binding, transcription, DNA-dependent, cell proliferation, protein ubiquitination, negative regulation of transcription from RNA polymerase II promoter, spermatogenesis, negative regulation of tumor necrosis factor production, negative regulation of protein kinase activity, interferon-gamma secretion, negative regulation of adaptive immune response, negative regulation of gene expression,…	TRUE	FALSE	FALSE	FALSE	FALSE	FALSE	FALSE	FALSE	FALSE	FALSE	FALSE	FALSE
ENSG00000205155	PSENEN	apoptotic process, Notch signaling pathway, protein processing, positive regulation of catalytic activity, membrane protein ectodomain proteolysis, Notch receptor processing, amyloid precursor protein catabolic process, nerve growth factor receptor signaling pathway, membrane protein intracellular domain proteolysis, plasma membrane, endoplasmic reticulum membrane, endoplasmic reticulum, Golgi ap…	FALSE	FALSE	FALSE	FALSE	FALSE	FALSE	FALSE	FALSE	TRUE	TRUE	TRUE	FALSE
ENSG00000205220	PSMB10	apoptotic process, regulation of apoptotic process, small molecule metabolic process, protein polyubiquitination, cell morphogenesis, antigen processing and presentation of peptide antigen via MHC class I, proteolysis involved in cellular protein catabolic process, mitotic cell cycle, viral reproduction, cell cycle checkpoint, S phase of mitotic cell cycle, M/G1 transition of mitotic cell cycle, …	FALSE	FALSE	FALSE	FALSE	FALSE	FALSE	FALSE	FALSE	FALSE	FALSE	FALSE	FALSE
ENSG00000205269	TMEM170B	integral to membrane	TRUE	FALSE	FALSE	FALSE	FALSE	FALSE	FALSE	FALSE	FALSE	FALSE	FALSE	FALSE
ENSG00000205302	SNX2	cell communication, intracellular protein transport, endocytosis, cytoplasm, intracellular membrane-bounded organelle, endosome membrane, early endosome membrane, protein binding, protein transporter activity, phosphatidylinositol binding, intracellular	TRUE	FALSE	FALSE	FALSE	FALSE	FALSE	FALSE	FALSE	FALSE	FALSE	FALSE	FALSE
ENSG00000205560	CPT1B	cellular lipid metabolic process, small molecule metabolic process, fatty acid beta-oxidation, long-chain fatty acid transport, carnitine shuttle, regulation of fatty acid oxidation, integral to membrane, mitochondrion, mitochondrial outer membrane, transferase activity, transferring acyl groups, carnitine O-palmitoyltransferase activity, intracellular membrane-bounded organelle, protein binding	TRUE	FALSE	FALSE	FALSE	FALSE	FALSE	FALSE	FALSE	FALSE	FALSE	FALSE	FALSE
ENSG00000206560	ANKRD28	nucleoplasm, protein binding	TRUE	FALSE	FALSE	FALSE	FALSE	FALSE	FALSE	FALSE	FALSE	FALSE	FALSE	FALSE
ENSG00000211445	GPX3	hydrogen peroxide catabolic process, oxidation-reduction process, glutathione metabolic process, response to oxidative stress, response to organic cyclic compound, response to drug, female pregnancy, response to corticosterone stimulus, protein homotetramerization, response to selenium ion, response to molecule of fungal origin, response to lipid hydroperoxide, extracellular space, selenium bindi…	TRUE	FALSE	FALSE	FALSE	FALSE	FALSE	FALSE	FALSE	FALSE	FALSE	FALSE	FALSE
ENSG00000213066	FGFR1OP	positive regulation of cell proliferation, mitotic cell cycle, G2/M transition of mitotic cell cycle, positive regulation of cell migration, microtubule anchoring, negative regulation of protein kinase activity, positive regulation of cell growth, negative regulation of protein tyrosine kinase activity, nucleus, cytosol, perinuclear region of cytoplasm, centrosome, microtubule organizing center, …	TRUE	FALSE	FALSE	FALSE	FALSE	FALSE	FALSE	FALSE	FALSE	FALSE	FALSE	FALSE
ENSG00000213096	ZNF254	regulation of transcription, DNA-dependent, intracellular, nucleic acid binding, transcription, DNA-dependent, negative regulation of transcription from RNA polymerase II promoter, nucleus, DNA binding, zinc ion binding	FALSE	FALSE	FALSE	FALSE	FALSE	FALSE	TRUE	FALSE	FALSE	FALSE	FALSE	FALSE
ENSG00000213337	ANKRD39	biological_process, cellular_component, molecular_function, protein binding	FALSE	FALSE	FALSE	FALSE	FALSE	FALSE	FALSE	FALSE	FALSE	FALSE	FALSE	FALSE
ENSG00000213390	ARHGAP19	small GTPase mediated signal transduction, regulation of small GTPase mediated signal transduction, signal transduction, nucleus, cytosol, intracellular, GTPase activator activity	TRUE	FALSE	FALSE	FALSE	FALSE	FALSE	FALSE	FALSE	FALSE	FALSE	FALSE	FALSE
ENSG00000213625	LEPROT	negative regulation of protein localization to cell surface, negative regulation of JAK-STAT cascade, negative regulation of growth hormone receptor signaling pathway, integral to membrane, Golgi membrane, Golgi apparatus, endosome membrane, endosome, receptor binding	TRUE	FALSE	FALSE	FALSE	FALSE	FALSE	FALSE	FALSE	FALSE	FALSE	FALSE	FALSE
ENSG00000213689	TREX1	mismatch repair, DNA repair, DNA recombination, DNA replication, cell death, cellular response to interferon-beta, intracellular, nuclear envelope, protein homodimerization activity, nucleic acid binding, exonuclease activity, metal ion binding, double-stranded DNA binding, single-stranded DNA binding, MutSalpha complex binding, 3'-5' exonuclease activity, adenyl deoxyribonucleotide binding, exod…	TRUE	FALSE	FALSE	FALSE	FALSE	FALSE	FALSE	FALSE	FALSE	FALSE	FALSE	FALSE
ENSG00000213977	TAX1BP3	negative regulation of cell proliferation, Wnt receptor signaling pathway, negative regulation of Wnt receptor signaling pathway, Rho protein signal transduction, regulation of Wnt receptor signaling pathway, activation of Cdc42 GTPase activity, negative regulation of protein localization to cell surface, nucleus, cytoplasm, plasma membrane, protein binding, protein C-terminus binding, beta-caten…	FALSE	FALSE	FALSE	FALSE	FALSE	FALSE	FALSE	FALSE	TRUE	TRUE	TRUE	FALSE
ENSG00000213995	CARKD	biological_process, cellular_component, mitochondrion, molecular_function, ATP binding, ATP-dependent NAD(P)H-hydrate dehydratase activity	TRUE	FALSE	FALSE	FALSE	FALSE	FALSE	FALSE	FALSE	FALSE	FALSE	FALSE	FALSE
ENSG00000214530	STARD10	lipid transport, cytoplasm, membrane, flagellum, lipid binding	TRUE	FALSE	FALSE	FALSE	FALSE	FALSE	FALSE	FALSE	FALSE	FALSE	FALSE	FALSE
ENSG00000214688	C10orf105	integral to membrane	FALSE	FALSE	FALSE	FALSE	FALSE	FALSE	FALSE	FALSE	FALSE	FALSE	FALSE	FALSE
ENSG00000215570			TRUE	FALSE	FALSE	FALSE	FALSE	FALSE	FALSE	FALSE	FALSE	FALSE	FALSE	FALSE
ENSG00000217555	CKLF	cell proliferation, macrophage chemotaxis, secretion by cell, neutrophil chemotaxis, lymphocyte chemotaxis, leukocyte chemotaxis, integral to membrane, extracellular region, extracellular space, chemokine activity	FALSE	FALSE	FALSE	FALSE	FALSE	FALSE	FALSE	FALSE	FALSE	FALSE	TRUE	FALSE
ENSG00000221963	APOL6	lipid transport, lipoprotein metabolic process, cytoplasm, extracellular region, lipid binding, lipid transporter activity	FALSE	FALSE	FALSE	FALSE	FALSE	FALSE	FALSE	FALSE	FALSE	FALSE	FALSE	FALSE
ENSG00000221983	UBA52	transcription, DNA-dependent, innate immune response, apoptotic process, negative regulation of transcription from RNA polymerase II promoter, regulation of apoptotic process, positive regulation of I-kappaB kinase/NF-kappaB cascade, positive regulation of transcription from RNA polymerase II promoter, protein polyubiquitination, translation, cellular protein modification process, antigen process…	TRUE	FALSE	FALSE	FALSE	FALSE	FALSE	FALSE	FALSE	FALSE	FALSE	FALSE	FALSE
ENSG00000221988	PPT2	palmitoyl-(protein) hydrolase activity, cellular protein modification process, lysosome, thiolester hydrolase activity	FALSE	FALSE	FALSE	FALSE	FALSE	FALSE	FALSE	FALSE	FALSE	FALSE	FALSE	FALSE
ENSG00000222011	FAM185A	cytoplasm	TRUE	FALSE	FALSE	FALSE	FALSE	FALSE	FALSE	FALSE	FALSE	FALSE	TRUE	FALSE
ENSG00000224051	GLTPD1	glycolipid transport, cytoplasm, glycolipid transporter activity, glycolipid binding	FALSE	FALSE	FALSE	FALSE	FALSE	FALSE	FALSE	FALSE	FALSE	FALSE	FALSE	FALSE
ENSG00000229833	PET100	integral to membrane, mitochondrion	TRUE	FALSE	FALSE	FALSE	FALSE	FALSE	FALSE	FALSE	FALSE	FALSE	FALSE	FALSE
ENSG00000232388	LINC00493	mitochondrion	TRUE	FALSE	FALSE	FALSE	FALSE	FALSE	FALSE	FALSE	FALSE	FALSE	FALSE	FALSE
ENSG00000232856		translational elongation, eukaryotic translation elongation factor 1 complex, translation elongation factor activity	FALSE	FALSE	FALSE	FALSE	FALSE	FALSE	FALSE	FALSE	FALSE	FALSE	FALSE	FALSE
ENSG00000233276	GPX1	negative regulation of apoptotic process, hydrogen peroxide catabolic process, oxidation-reduction process, small molecule metabolic process, induction of apoptosis, glutathione metabolic process, response to oxidative stress, protein oxidation, purine nucleobase metabolic process, triglyceride metabolic process, sensory perception of sound, fat cell differentiation, response to toxin, negative r…	FALSE	FALSE	FALSE	FALSE	FALSE	FALSE	FALSE	FALSE	FALSE	FALSE	FALSE	FALSE
ENSG00000234545	FAM133B		FALSE	FALSE	FALSE	FALSE	FALSE	FALSE	FALSE	FALSE	FALSE	FALSE	FALSE	FALSE
ENSG00000235863	B3GALT4	protein glycosylation, integral to membrane, membrane, Golgi membrane, galactosyltransferase activity, UDP-galactose:beta-N-acetylglucosamine beta-1,3-galactosyltransferase activity, ganglioside galactosyltransferase activity	FALSE	FALSE	FALSE	FALSE	FALSE	FALSE	FALSE	FALSE	FALSE	FALSE	FALSE	FALSE
ENSG00000237190	CDKN2AIPNL		FALSE	FALSE	FALSE	FALSE	FALSE	FALSE	FALSE	FALSE	FALSE	FALSE	FALSE	FALSE
ENSG00000237440	ZNF737	zinc ion binding, transcription, DNA-dependent, regulation of transcription, DNA-dependent, nucleus, intracellular, DNA binding, nucleic acid binding	TRUE	FALSE	FALSE	FALSE	FALSE	FALSE	FALSE	FALSE	FALSE	FALSE	FALSE	FALSE
ENSG00000238227	C9orf69	cell cycle, GTP binding	TRUE	FALSE	FALSE	FALSE	FALSE	FALSE	FALSE	FALSE	FALSE	FALSE	FALSE	FALSE
ENSG00000241553	ARPC4	actin filament polymerization, cytoskeleton, actin nucleation, cytoplasm, cell projection, Arp2/3 protein complex, protein binding, protein binding, bridging, actin filament binding	FALSE	FALSE	FALSE	FALSE	FALSE	FALSE	TRUE	FALSE	TRUE	FALSE	FALSE	FALSE
ENSG00000242110	AMACR	cellular lipid metabolic process, small molecule metabolic process, metabolic process, bile acid metabolic process, bile acid biosynthetic process, fatty acid beta-oxidation using acyl-CoA oxidase, cytoplasm, mitochondrion, peroxisome, peroxisomal matrix, catalytic activity, receptor binding, alpha-methylacyl-CoA racemase activity	TRUE	FALSE	FALSE	FALSE	FALSE	FALSE	FALSE	FALSE	FALSE	FALSE	FALSE	FALSE
ENSG00000242247	ARFGAP3	intracellular protein transport, vesicle-mediated transport, regulation of ARF GTPase activity, protein secretion, cytoplasm, cytosol, Golgi membrane, Golgi apparatus, zinc ion binding, protein transporter activity, ARF GTPase activator activity	TRUE	FALSE	FALSE	FALSE	FALSE	FALSE	FALSE	FALSE	FALSE	FALSE	FALSE	FALSE
ENSG00000242574	HLA-DMB	protein binding, antigen processing and presentation of peptide or polysaccharide antigen via MHC class II, immune response, antigen processing and presentation, integral to membrane, membrane, MHC class II protein complex, antigen processing and presentation of exogenous peptide antigen via MHC class II, late endosome membrane, lysosomal membrane	FALSE	FALSE	FALSE	FALSE	FALSE	FALSE	FALSE	FALSE	FALSE	FALSE	FALSE	FALSE
ENSG00000242802	AP5Z1	protein transport, endosomal transport, double-strand break repair via homologous recombination, cell death, nucleus, cytoplasm, nucleolus, AP-type membrane coat adaptor complex, protein binding	FALSE	FALSE	FALSE	FALSE	FALSE	FALSE	FALSE	FALSE	FALSE	FALSE	FALSE	FALSE
ENSG00000243566	UPK3B	negative regulation of gene expression, integral to membrane, plasma membrane	TRUE	FALSE	FALSE	FALSE	FALSE	FALSE	FALSE	FALSE	FALSE	FALSE	FALSE	FALSE
ENSG00000243660	ZNF487P	regulation of transcription, DNA-dependent, intracellular, nucleic acid binding, , transcription, DNA-dependent, nucleus, DNA binding, zinc ion binding	FALSE	FALSE	FALSE	FALSE	FALSE	FALSE	FALSE	FALSE	FALSE	FALSE	FALSE	FALSE
ENSG00000243725	TTC4	protein binding	FALSE	FALSE	FALSE	FALSE	FALSE	FALSE	FALSE	FALSE	FALSE	FALSE	FALSE	FALSE
ENSG00000244462	RBM12	nucleus, nucleotide binding, RNA binding, nucleic acid binding	TRUE	FALSE	FALSE	FALSE	FALSE	FALSE	FALSE	FALSE	FALSE	FALSE	FALSE	FALSE
ENSG00000247596	TWF2	cell projection organization, cellular response to growth factor stimulus, positive regulation of lamellipodium assembly, positive regulation of neuron projection development, regulation of actin cytoskeleton organization, positive regulation of axon extension, negative regulation of actin filament polymerization, cellular response to retinoic acid, sequestering of actin monomers, barbed-end acti…	FALSE	FALSE	FALSE	FALSE	FALSE	FALSE	FALSE	FALSE	FALSE	FALSE	FALSE	FALSE
ENSG00000253729	PRKDC	phosphotransferase activity, alcohol group as acceptor, transferase activity, transferring phosphorus-containing groups, apoptotic process, heart development, brain development, somitogenesis, positive regulation of apoptotic process, telomere maintenance, double-strand break repair, response to gamma radiation, T cell differentiation in thymus, immunoglobulin V(D)J recombination, T cell receptor…	FALSE	FALSE	FALSE	FALSE	FALSE	FALSE	FALSE	FALSE	FALSE	FALSE	FALSE	FALSE
ENSG00000255150	EID3	transcription, DNA-dependent, regulation of transcription, DNA-dependent, DNA repair, DNA recombination, nucleus, cytoplasm, chromosome, telomeric region, Smc5-Smc6 complex, protein binding, identical protein binding	TRUE	FALSE	FALSE	FALSE	FALSE	FALSE	FALSE	FALSE	FALSE	FALSE	FALSE	FALSE
ENSG00000256060	TRAPPC2P1	transcription, DNA-dependent, skeletal system development, regulation of transcription, DNA-dependent, transport, ER to Golgi vesicle-mediated transport, nucleus, intracellular, perinuclear region of cytoplasm, endoplasmic reticulum, Golgi apparatus, cis-Golgi network, protein binding, transcription factor binding	FALSE	FALSE	FALSE	FALSE	FALSE	FALSE	FALSE	FALSE	FALSE	FALSE	FALSE	FALSE
ENSG00000256269	HMBS	tetrapyrrole biosynthetic process, hydroxymethylbilane synthase activity, small molecule metabolic process, organ regeneration, response to estradiol stimulus, response to hypoxia, porphyrin-containing compound metabolic process, response to organic cyclic compound, response to drug, response to amino acid stimulus, astrocyte differentiation, response to zinc ion, cellular response to arsenic-con…	FALSE	FALSE	FALSE	FALSE	FALSE	FALSE	FALSE	FALSE	FALSE	TRUE	FALSE	FALSE
ENSG00000257365	FNTB	negative regulation of cell proliferation, response to organic cyclic compound, positive regulation of fibroblast proliferation, positive regulation of cell cycle, response to cytokine stimulus, wound healing, response to inorganic substance, protein farnesylation, protein complex, microtubule associated complex, zinc ion binding, protein binding, catalytic activity, peptide binding, drug binding…	TRUE	FALSE	FALSE	FALSE	FALSE	FALSE	FALSE	FALSE	FALSE	FALSE	FALSE	FALSE
ENSG00000257755			FALSE	FALSE	FALSE	FALSE	FALSE	FALSE	FALSE	FALSE	FALSE	FALSE	FALSE	FALSE
ENSG00000258315	C17orf49	DNA binding, chromatin binding, , chromatin modification, MLL1 complex, NURF complex	TRUE	FALSE	FALSE	FALSE	FALSE	FALSE	FALSE	FALSE	FALSE	FALSE	FALSE	FALSE
ENSG00000258365			FALSE	FALSE	FALSE	FALSE	FALSE	FALSE	FALSE	FALSE	FALSE	FALSE	FALSE	FALSE
ENSG00000258790	KIAA0391	tRNA processing, mitochondrion	TRUE	FALSE	FALSE	FALSE	FALSE	FALSE	FALSE	FALSE	FALSE	FALSE	FALSE	FALSE
ENSG00000264278			FALSE	FALSE	FALSE	FALSE	FALSE	FALSE	FALSE	FALSE	FALSE	FALSE	FALSE	FALSE
ENSG00000267982			TRUE	FALSE	FALSE	FALSE	FALSE	FALSE	FALSE	FALSE	FALSE	FALSE	FALSE	FALSE
ENSG00000268172			TRUE	FALSE	FALSE	FALSE	FALSE	FALSE	FALSE	FALSE	FALSE	FALSE	FALSE	FALSE
ENSG00000268403			FALSE	FALSE	FALSE	FALSE	FALSE	FALSE	FALSE	FALSE	FALSE	FALSE	FALSE	FALSE
ENSG00000269343	ZNF587B	intracellular, zinc ion binding, regulation of transcription, DNA-dependent, nucleic acid binding, nucleus	TRUE	FALSE	FALSE	FALSE	FALSE	FALSE	FALSE	FALSE	FALSE	FALSE	FALSE	FALSE
ENSG00000269407			FALSE	FALSE	FALSE	FALSE	FALSE	FALSE	FALSE	FALSE	FALSE	FALSE	FALSE	FALSE
ENSG00000269554			TRUE	FALSE	FALSE	FALSE	FALSE	FALSE	FALSE	FALSE	FALSE	FALSE	FALSE	FALSE

## Sheet: T cells
Ensembl ID	HGNC symbol	GO term	Genotype	Age	Sex	BMI	Alcohol	Lymphocyte count	Lymphocyte percentage	Maximum temperature	Minimum temperature	Daylight
ENSG00000123219	CENPK	positive regulation of transcription from RNA polymerase II promoter, mitotic cell cycle, nucleosome assembly, mitotic prometaphase, M phase of mitotic cell cycle, CenH3-containing nucleosome assembly at centromere, nucleus, cytosol, nucleoplasm, condensed chromosome kinetochore, protein binding	TRUE	FALSE	FALSE	FALSE	FALSE	FALSE	FALSE	FALSE	FALSE	FALSE
ENSG00000127081	ZNF484	transcription, DNA-dependent, regulation of transcription, DNA-dependent, nucleus, intracellular, DNA binding, zinc ion binding, nucleic acid binding	TRUE	FALSE	FALSE	FALSE	FALSE	FALSE	FALSE	TRUE	TRUE	FALSE
ENSG00000152527	PLEKHH2	integral to membrane, cytoplasm, cytoskeleton, protein binding, phospholipid binding	TRUE	FALSE	FALSE	FALSE	FALSE	FALSE	FALSE	FALSE	FALSE	FALSE

## Sheet: Monocytes + neutrophils
Ensembl ID	HGNC symbol	GO term
ENSG00000072415	MPP5	peripheral nervous system myelin maintenance, tight junction assembly, cell-cell junction organization, protein localization to myelin sheath abaxonal region, cell junction assembly, establishment of protein localization to plasma membrane, myelin assembly, cytoplasm, plasma membrane, tight junction, endomembrane system, lateral loop, Schmidt-Lanterman incisure, myelin sheath adaxonal region, pro…
ENSG00000101084	C20orf24	biological_process, cellular_component, molecular_function
ENSG00000108950	FAM20A	enamel mineralization, extracellular region
ENSG00000119714	GPR68	inflammatory response, G-protein coupled receptor signaling pathway, integral to membrane, plasma membrane, integral to plasma membrane, G-protein coupled receptor activity
ENSG00000135899	SP110	transcription, DNA-dependent, regulation of transcription, DNA-dependent, signal transduction, virus-host interaction, nucleus, nucleolus, DNA binding, zinc ion binding, protein binding, signal transducer activity
ENSG00000138735	PDE5A	signal transduction, response to hypoxia, response to lipopolysaccharide, positive regulation of apoptotic process, nervous system development, positive regulation of vasoconstriction, negative regulation of T cell proliferation, positive regulation of MAP kinase activity, response to testosterone stimulus, cGMP catabolic process, blood coagulation, vasodilation, positive regulation of chronic in…
ENSG00000142794	NBPF3	cytoplasm
ENSG00000148459	PDSS1	isoprenoid biosynthetic process, protein heterotetramerization, ubiquinone biosynthetic process, mitochondrion, metal ion binding, protein heterodimerization activity, trans-hexaprenyltranstransferase activity, trans-octaprenyltranstransferase activity
ENSG00000151014	CCRN4L	regulation of transcription, DNA-dependent, transcription from RNA polymerase II promoter, rhythmic process, deadenylation-dependent decapping of nuclear-transcribed mRNA, cytoplasmic mRNA processing body assembly, nucleus, nucleoplasm, cytoplasmic mRNA processing body, sequence-specific DNA binding transcription factor activity, protein binding
ENSG00000153933	DGKE	protein kinase C-activating G-protein coupled receptor signaling pathway, intracellular signal transduction, phospholipid biosynthetic process, platelet activation, blood coagulation, integral to membrane, plasma membrane, intracellular, ATP binding, diacylglycerol kinase activity, metal ion binding
ENSG00000169291	SHE	protein binding
ENSG00000170545	SMAGP	integral to membrane, nucleus, plasma membrane, cell junction, cytoplasmic vesicle membrane
ENSG00000172216	CEBPB	inflammatory response, induction of apoptosis, negative regulation of transcription, DNA-dependent, immune response, regulation of transcription, DNA-dependent, response to lipopolysaccharide, neuron differentiation, transcription from RNA polymerase II promoter, embryonic placenta development, brown fat cell differentiation, cellular response to amino acid stimulus, mammary gland epithelial cell…
ENSG00000197375	SLC22A5	sodium ion transport, transmembrane transport, ion transmembrane transport, drug transmembrane transport, drug transport, quaternary ammonium group transport, carnitine transport, quorum sensing involved in interaction with host, positive regulation of intestinal epithelial structure maintenance, sodium-dependent organic cation transport, antibiotic transport, integral to membrane, plasma membran…
ENSG00000204977	TRIM13	positive regulation of I-kappaB kinase/NF-kappaB cascade, signal transduction, ER-associated protein catabolic process, positive regulation of cell death, response to gamma radiation, proteasomal ubiquitin-dependent protein catabolic process, positive regulation of macroautophagy, protein autoubiquitination, anatomical structure morphogenesis, integral to membrane, cytoplasm, intracellular, endop…
ENSG00000268220

## Sheet: Monocytes + T cells
Ensembl ID	HGNC symbol	GO term
ENSG00000022556	NLRP2	positive regulation of interleukin-1 beta secretion, positive regulation of cysteine-type endopeptidase activity involved in apoptotic process, cytoplasm, protein binding, ATP binding, Pyrin domain binding
ENSG00000062716	VMP1	autophagy, embryo implantation, cell-cell adhesion, regulation of autophagy, cell junction assembly, integral to membrane, plasma membrane, autophagic vacuole membrane, endoplasmic reticulum, pre-autophagosomal structure, endoplasmic reticulum-Golgi intermediate compartment membrane, protein binding
ENSG00000067082	KLF6	transcription, DNA-dependent, positive regulation of transcription, DNA-dependent, positive regulation of transcription from RNA polymerase II promoter, regulation of transcription, DNA-dependent, cytokine-mediated signaling pathway, wound healing, B cell differentiation, nucleus, cytoplasm, intracellular, sequence-specific DNA binding transcription factor activity, zinc ion binding, double-stran…
ENSG00000105835	NAMPT	small molecule metabolic process, positive regulation of cell proliferation, signal transduction, NAD biosynthetic process, cell-cell signaling, NAD metabolic process, positive regulation of nitric-oxide synthase biosynthetic process, vitamin metabolic process, water-soluble vitamin metabolic process, nicotinamide metabolic process, cytoplasm, cytosol, cytokine activity, nicotinate-nucleotide dip…
ENSG00000107104	KANK1	transcription, DNA-dependent, regulation of transcription, DNA-dependent, negative regulation of cell migration, negative regulation of neuron projection development, negative regulation of insulin receptor signaling pathway, regulation of establishment of cell polarity, negative regulation of actin filament polymerization, negative regulation of Rho protein signal transduction, positive regulati…
ENSG00000112096	SOD2	negative regulation of cell proliferation, negative regulation of apoptotic process, oxidation-reduction process, superoxide metabolic process, heart development, protein homooligomerization, glutathione metabolic process, response to cadmium ion, response to hypoxia, response to lipopolysaccharide, response to drug, hydrogen peroxide biosynthetic process, response to hyperoxia, post-embryonic de…
ENSG00000129353	SLC44A2	transmembrane transport, small molecule metabolic process, positive regulation of I-kappaB kinase/NF-kappaB cascade, signal transduction, phospholipid metabolic process, choline transport, glycerophospholipid biosynthetic process, phosphatidylcholine biosynthetic process, integral to membrane, plasma membrane, signal transducer activity, choline transmembrane transporter activity
ENSG00000143384	MCL1	apoptotic process, multicellular organismal development, regulation of apoptotic process, negative regulation of apoptotic process, response to cytokine stimulus, cell fate determination, cellular homeostasis, negative regulation of anoikis, negative regulation of extrinsic apoptotic signaling pathway in absence of ligand, integral to membrane, cytoplasm, mitochondrion, membrane, mitochondrial ma…
ENSG00000163606	CD200R1	regulation of immune response, virus-host interaction, integral to membrane, plasma membrane, extracellular region, protein binding, membrane
ENSG00000163659	TIPARP	female gonad development, post-embryonic development, nitrogen compound metabolic process, smooth muscle tissue development, platelet-derived growth factor receptor signaling pathway, hemopoiesis, protein ADP-ribosylation, kidney development, skeletal system morphogenesis, vasculogenesis, face morphogenesis, palate development, estrogen metabolic process, androgen metabolic process, multicellular…
ENSG00000179909	ZNF154	transcription, DNA-dependent, regulation of transcription, DNA-dependent, nucleus, intracellular, DNA binding, sequence-specific DNA binding transcription factor activity, zinc ion binding, nucleic acid binding
ENSG00000184588	PDE4B	signal transduction, cAMP catabolic process, cellular response to lipopolysaccharide, cellular response to drug, neutrophil chemotaxis, leukocyte migration, neutrophil homeostasis, nucleus, cytosol, perinuclear region of cytoplasm, cytoplasm, cell periphery, metal ion binding, catalytic activity, 3',5'-cyclic-nucleotide phosphodiesterase activity, 3',5'-cyclic-AMP phosphodiesterase activity
ENSG00000189067	LITAF	transcription, DNA-dependent, apoptotic process, positive regulation of I-kappaB kinase/NF-kappaB cascade, signal transduction, regulation of transcription from RNA polymerase II promoter, cellular response to lipopolysaccharide, response to lipopolysaccharide, regulation of cytokine production, negative regulation of NF-kappaB import into nucleus, plasma membrane, Golgi apparatus, lysosomal memb…
ENSG00000196436	NPIPL2	extracellular region
ENSG00000197728	RPS26	translation, viral reproduction, gene expression, RNA metabolic process, mRNA metabolic process, translational elongation, cellular protein metabolic process, negative regulation of RNA splicing, SRP-dependent cotranslational protein targeting to membrane, translational initiation, viral infectious cycle, nuclear-transcribed mRNA catabolic process, nonsense-mediated decay, translational terminati…
ENSG00000229644	NAMPTL	NAD biosynthetic process, cytoplasm, nicotinate-nucleotide diphosphorylase (carboxylating) activity, nicotinate phosphoribosyltransferase activity

## Sheet: Neutrophils + T cells
Ensembl ID	HGNC symbol	GO term
ENSG00000004866	ST7	integral to membrane
ENSG00000006712	PAF1	transcription, DNA-dependent, negative regulation of transcription from RNA polymerase II promoter, positive regulation of transcription from RNA polymerase II promoter, Wnt receptor signaling pathway, cellular response to lipopolysaccharide, endodermal cell fate commitment, stem cell maintenance, histone H2B ubiquitination, negative regulation of S phase of mitotic cell cycle, negative regulatio…
ENSG00000007047	MARK4	protein phosphorylation, ATP binding, protein kinase activity, transferase activity, transferring phosphorus-containing groups, microtubule cytoskeleton organization, nervous system development, microtubule bundle formation, positive regulation of programmed cell death, neuron projection, centrosome, microtubule cytoskeleton, microtubule organizing center, protein binding, protein serine/threonin…
ENSG00000008283	CYB561	electron transport chain, integral to membrane, metal ion binding, ferric-chelate reductase activity, transmembrane electron transfer carrier,
ENSG00000010626	LRRC23	protein binding, biological_process, cellular_component, molecular_function,
ENSG00000011275	RNF216	apoptotic process, proteasomal ubiquitin-dependent protein catabolic process, protein K48-linked ubiquitination, regulation of interferon-beta production, virus-host interaction, regulation of defense response to virus by host, nucleus, cytoplasm, zinc ion binding, protein binding, ligase activity,
[truncated: 406 more rows]

## Sheet: Common
Ensembl ID	HGNC symbol	GO term
[truncated: 271 more rows]
