# Supplementary material for: Genome-wide analysis of differential transcriptional and epigenetic variability across human immune cell types
Source: Genome Biol. 2017 Jan 26;18:18. doi: 10.1186/s13059-017-1156-8 (PMC5270224; doi:10.1186/s13059-017-1156-8)
Supplement: Additional file 5: — Neutrophil network gene ontology enrichment. Ontology enrichment analyses of three modules of a correlation network of neutrophil-specific hypervariable genes not mediated by cis genetic effects using ClueGO. (XLSX 68 kb) [file 13059_2017_1156_MOESM5_ESM.xlsx]

## Sheet: Module 1
ID	Term	p.BH
GO:0016234	inclusion body	0.00095
GO:0016235	aggresome	0.0032
GO:0005080	protein kinase C binding	0.015
GO:0005884	actin filament	0.015
GO:0019213	deacetylase activity	0.017
GO:0038061	NIK/NF-kappaB signaling	0.017
GO:0002220	innate immune response activating cell surface receptor signaling pathway	0.017
GO:0030117	membrane coat	0.019
GO:0051015	actin filament binding	0.019
GO:0002223	stimulatory C-type lectin receptor signaling pathway	0.019
GO:0016811	hydrolase activity, acting on carbon-nitrogen (but not peptide) bonds, in linear amides	0.02
GO:0032608	interferon-beta production	0.02
GO:0005496	steroid binding	0.02
GO:0006970	response to osmotic stress	0.02
GO:0051443	positive regulation of ubiquitin-protein transferase activity	0.02
GO:0006641	triglyceride metabolic process	0.021
GO:0032480	negative regulation of type I interferon production	0.021
GO:0032648	regulation of interferon-beta production	0.021
GO:0032432	actin filament bundle	0.021
GO:0097517	contractile actin filament bundle	0.021
GO:0001725	stress fiber	0.021
GO:0051351	positive regulation of ligase activity	0.021
GO:0006638	neutral lipid metabolic process	0.022
GO:0042641	actomyosin	0.022
GO:0006639	acylglycerol metabolic process	0.023
GO:0043178	alcohol binding	0.024
GO:0005132	Salmonella infection	0.025
GO:0042158	lipoprotein biosynthetic process	0.033
GO:0006497	protein lipidation	0.033
GO:0000502	proteasome complex	0.033
GO:0051437	positive regulation of ubiquitin-protein ligase activity involved in regulation of mitotic cell cycle transition	0.033
GO:0048013	ephrin receptor signaling pathway	0.036

## Sheet: Module 2
ID	Term	p.BH
GO:0034212	peptide N-acetyltransferase activity	0.0033
GO:0003724	RNA helicase activity	0.0035
GO:0030433	ER-associated ubiquitin-dependent protein catabolic process	0.0036
GO:1902230	negative regulation of intrinsic apoptotic signaling pathway in response to DNA damage	0.0037
GO:0031123	RNA 3'-end processing	0.0039
GO:0051028	mRNA transport	0.004
GO:0043487	regulation of RNA stability	0.0042
GO:0003040	Spliceosome	0.0042
GO:0050658	RNA transport	0.0042
GO:0050657	nucleic acid transport	0.0042
GO:0071427	mRNA-containing ribonucleoprotein complex export from nucleus	0.0043
GO:0006406	mRNA export from nucleus	0.0043
GO:0000184	nuclear-transcribed mRNA catabolic process, nonsense-mediated decay	0.0044
GO:1902229	regulation of intrinsic apoptotic signaling pathway in response to DNA damage	0.0044
GO:0000184	nuclear-transcribed mRNA catabolic process, nonsense-mediated decay	0.0044
GO:0003013	RNA transport	0.0046
GO:0036503	ERAD pathway	0.0047
GO:0008080	N-acetyltransferase activity	0.0048
GO:0071426	ribonucleoprotein complex export from nucleus	0.0048
GO:0032784	regulation of DNA-templated transcription, elongation	0.0049
GO:0035145	exon-exon junction complex	0.005
GO:0051082	unfolded protein binding	0.005
GO:0016410	N-acyltransferase activity	0.005
GO:0071166	ribonucleoprotein complex localization	0.005
GO:0035145	exon-exon junction complex	0.005
GO:0006405	RNA export from nucleus	0.005
GO:0071013	catalytic step 2 spliceosome	0.005
GO:0010501	RNA secondary structure unwinding	0.0051
GO:0031124	mRNA 3'-end processing	0.0051
GO:0016259	selenocysteine metabolic process	0.0052
GO:0070035	purine NTP-dependent helicase activity	0.0052
GO:0031248	protein acetyltransferase complex	0.0054
GO:1902493	acetyltransferase complex	0.0054
GO:0006369	termination of RNA polymerase II transcription	0.0054
GO:2001021	negative regulation of response to DNA damage stimulus	0.0055
GO:0022626	cytosolic ribosome	0.0056
GO:0016407	acetyltransferase activity	0.0056
GO:1903311	regulation of mRNA metabolic process	0.0057
GO:0019843	rRNA binding	0.0076
GO:0061733	peptide-lysine-N-acetyltransferase activity	0.0078
GO:0015935	small ribosomal subunit	0.011
GO:0016234	inclusion body	0.011
GO:0000502	proteasome complex	0.012
GO:0003015	mRNA surveillance pathway	0.014
GO:0051087	chaperone binding	0.014
GO:0003015	mRNA surveillance pathway	0.014
GO:0043484	regulation of RNA splicing	0.014

## Sheet: Module 3
ID	Term	p.BH
GO:0034340	response to type I interferon	5.9e-12
GO:0071357	cellular response to type I interferon	7.8e-12
GO:0060337	type I interferon signaling pathway	7.8e-12
GO:0005164	Influenza A	1e-06
GO:0032020	ISG15-protein conjugation	2.4e-06
GO:0045071	negative regulation of viral genome replication	1.8e-05
GO:0005168	Herpes simplex infection	2e-05
GO:0032480	negative regulation of type I interferon production	2.4e-05
GO:0048525	negative regulation of viral process	9.3e-05
GO:1903901	negative regulation of viral life cycle	9.7e-05
GO:0045069	regulation of viral genome replication	0.0001
GO:0019079	viral genome replication	0.00016
GO:0005160	Hepatitis C	0.00024
GO:0005162	Measles	0.00034
GO:0003727	single-stranded RNA binding	0.00069
GO:0003725	double-stranded RNA binding	0.00072
