# Supplementary material for: Genome-wide analysis of differential transcriptional and epigenetic variability across human immune cell types
Source: Genome Biol. 2017 Jan 26;18:18. doi: 10.1186/s13059-017-1156-8 (PMC5270224; doi:10.1186/s13059-017-1156-8)
Supplement: Additional file 6: — Gene ontology enrichment of sex-specific differentially expressed genes in neutrophils. Ontology enrichment analysis of differentially expressed genes between males and females in neutrophils using GOseq. (XLSX 57 kb) [file 13059_2017_1156_MOESM6_ESM.xlsx]

## Sheet: Up in females
Nr of genes	Ontology	Category	Term	DE genes	Total	p.BH
682	BP	GO:0006955	immune response	139	1067	6.26402e-19
	BP	GO:0006952	defense response	140	1125	1.72006e-17
	BP	GO:0045087	innate immune response	100	728	2.30751e-14
	BP	GO:0002252	immune effector process	82	530	2.88252e-14
	BP	GO:0002376	immune system process	175	1716	7.19057e-14
	BP	GO:0098542	defense response to other organism	60	322	7.34941e-14
	BP	GO:0019221	cytokine-mediated signaling pathway	65	385	3.33612e-13
	BP	GO:0051607	defense response to virus	49	231	3.33612e-13
	BP	GO:0034340	response to type I interferon	26	69	1.21645e-12
	BP	GO:0034097	response to cytokine	79	546	1.50617e-12
	BP	GO:0009615	response to virus	53	284	3.11844e-12
	BP	GO:0071345	cellular response to cytokine stimulus	72	479	3.11844e-12
	BP	GO:0060337	type I interferon signaling pathway	25	68	5.75999e-12
	BP	GO:0071357	cellular response to type I interferon	25	68	5.75999e-12
	BP	GO:0043207	response to external biotic stimulus	77	541	5.8595e-12
	BP	GO:0051707	response to other organism	77	541	5.8595e-12
	BP	GO:0009607	response to biotic stimulus	78	565	2.08755e-11
	BP	GO:0050776	regulation of immune response	84	702	6.41303e-09
	BP	GO:0031347	regulation of defense response	69	528	8.51041e-09
	BP	GO:0002682	regulation of immune system process	106	1026	6.69825e-08
	BP	GO:0034341	response to interferon-gamma	26	108	6.76048e-08
	BP	GO:0071346	cellular response to interferon-gamma	24	94	1.1471e-07
	BP	GO:0009605	response to external stimulus	137	1479	1.1471e-07
	BP	GO:0001817	regulation of cytokine production	54	391	1.96947e-07
	BP	GO:1903901	negative regulation of viral life cycle	19	61	2.64069e-07
	BP	GO:0048525	negative regulation of viral process	19	62	3.4562e-07
	BP	GO:0007166	cell surface receptor signaling pathway	147	1646	4.07625e-07
	BP	GO:0002697	regulation of immune effector process	43	284	7.93381e-07
	BP	GO:0045071	negative regulation of viral genome replication	14	36	1.39621e-06
	BP	GO:0001816	cytokine production	55	428	1.50715e-06
	CC	GO:0005887	integral component of plasma membrane	72	634	1.82546e-06
	CC	GO:0031224	intrinsic component of membrane	204	2591	2.01585e-06
	BP	GO:0060333	interferon-gamma-mediated signaling pathway	20	78	2.46606e-06
	CC	GO:0031226	intrinsic component of plasma membrane	74	667	2.5545e-06
	CC	GO:0016021	integral component of membrane	200	2545	3.24756e-06
	BP	GO:0043901	negative regulation of multi-organism process	23	104	3.84044e-06
	BP	GO:0045088	regulation of innate immune response	44	315	4.00818e-06
	BP	GO:0050896	response to stimulus	333	4802	5.83976e-06
	BP	GO:0007165	signal transduction	239	3187	6.89341e-06
	BP	GO:0006954	inflammatory response	47	359	8.16549e-06
	MF	GO:0004871	signal transducer activity	67	602	1.0367e-05
	BP	GO:0001818	negative regulation of cytokine production	27	147	1.33288e-05
	BP	GO:0010033	response to organic substance	149	1788	1.63042e-05
	BP	GO:0050778	positive regulation of immune response	57	493	2.32851e-05
	MF	GO:0060089	molecular transducer activity	75	722	2.38866e-05
	BP	GO:0002684	positive regulation of immune system process	69	648	2.38866e-05
	BP	GO:0044700	single organism signaling	247	3375	2.82226e-05
	BP	GO:0023052	signaling	247	3379	3.08113e-05
	BP	GO:0042221	response to chemical	180	2305	3.46183e-05
	BP	GO:0051704	multi-organism process	126	1491	3.86827e-05
	MF	GO:0038023	signaling receptor activity	48	394	6.30392e-05
	BP	GO:0007154	cell communication	253	3521	7.67436e-05
	MF	GO:0004872	receptor activity	57	517	0.000124389
	BP	GO:0032479	regulation of type I interferon production	21	108	0.000127616
	BP	GO:0006950	response to stress	199	2669	0.000140292
	BP	GO:0032606	type I interferon production	21	110	0.000164759
	BP	GO:0032611	interleukin-1 beta production	12	39	0.000225672
	BP	GO:0001819	positive regulation of cytokine production	36	269	0.000239104
	BP	GO:0050702	interleukin-1 beta secretion	9	21	0.000269431
	BP	GO:0032480	negative regulation of type I interferon production	12	40	0.000269431
	MF	GO:0004888	transmembrane signaling receptor activity	42	338	0.000277569
	CC	GO:0005886	plasma membrane	177	2303	0.000323645
	BP	GO:0019079	viral genome replication	16	72	0.00036134
	BP	GO:0071310	cellular response to organic substance	118	1405	0.000395648
	BP	GO:0043900	regulation of multi-organism process	41	338	0.000411642
	CC	GO:0061702	inflammasome complex	6	9	0.000442719
	BP	GO:0048584	positive regulation of response to stimulus	109	1277	0.000506724
	BP	GO:0050701	interleukin-1 secretion	9	23	0.000521739
	BP	GO:0045069	regulation of viral genome replication	14	58	0.000532116
	BP	GO:0031349	positive regulation of defense response	38	305	0.000545564
	BP	GO:0032612	interleukin-1 production	12	44	0.000728221
	CC	GO:0044425	membrane part	237	3364	0.000985769
	CC	GO:0071944	cell periphery	178	2360	0.00114971
	BP	GO:0051716	cellular response to stimulus	280	4088	0.00124992
	BP	GO:0032651	regulation of interleukin-1 beta production	10	32	0.00124992
	BP	GO:0032731	positive regulation of interleukin-1 beta production	8	20	0.00146869
	BP	GO:0070269	pyroptosis	4	4	0.00153575
	BP	GO:0070887	cellular response to chemical stimulus	132	1666	0.00181956
	BP	GO:0002699	positive regulation of immune effector process	19	111	0.00229751
	BP	GO:0048583	regulation of response to stimulus	171	2285	0.00242148
	BP	GO:0040011	locomotion	88	1006	0.00243415
	CC	GO:0044459	plasma membrane part	100	1184	0.00306141
	BP	GO:0002443	leukocyte mediated immunity	27	199	0.00326675
	BP	GO:0045089	positive regulation of innate immune response	33	270	0.00333948
	BP	GO:0002253	activation of immune response	44	406	0.00335714
	BP	GO:0032652	regulation of interleukin-1 production	10	36	0.0035538
	BP	GO:0050706	regulation of interleukin-1 beta secretion	7	17	0.00422781
	BP	GO:0032732	positive regulation of interleukin-1 production	8	23	0.00429023
	BP	GO:0043903	regulation of symbiosis, encompassing mutualism through parasitism	24	173	0.00483588
	BP	GO:0032101	regulation of response to external stimulus	51	509	0.0057328
	BP	GO:0050704	regulation of interleukin-1 secretion	7	18	0.0060687
	BP	GO:0050777	negative regulation of immune response	15	81	0.00644731
	BP	GO:0002683	negative regulation of immune system process	30	243	0.00644731
	BP	GO:0050792	regulation of viral process	22	154	0.00644731
	BP	GO:0006928	movement of cell or subcellular component	92	1097	0.00757369
	MF	GO:0008329	signaling pattern recognition receptor activity	5	9	0.00896153
	MF	GO:0038187	pattern recognition receptor activity	5	9	0.00896153
	BP	GO:0002250	adaptive immune response	28	224	0.0100835
	CC	GO:0009986	cell surface	41	387	0.0102294
	BP	GO:0045341	MHC class I biosynthetic process	4	5	0.0102989
	BP	GO:0045343	regulation of MHC class I biosynthetic process	4	5	0.0102989
	BP	GO:0051091	positive regulation of sequence-specific DNA binding transcription factor activity	22	157	0.0108988
	BP	GO:0035455	response to interferon-alpha	6	15	0.0114721
	CC	GO:0098802	plasma membrane receptor complex	17	103	0.0116008
	BP	GO:0050688	regulation of defense response to virus	20	137	0.0121297
	BP	GO:0080134	regulation of response to stress	85	1015	0.0125677
	BP	GO:0043123	positive regulation of I-kappaB kinase/NF-kappaB signaling	20	140	0.0150613
	BP	GO:0050718	positive regulation of interleukin-1 beta secretion	6	15	0.0160301
	BP	GO:0032020	ISG15-protein conjugation	4	6	0.0163156
	BP	GO:0002831	regulation of response to biotic stimulus	22	164	0.0176931
	BP	GO:0051090	regulation of sequence-specific DNA binding transcription factor activity	30	257	0.0176931
	BP	GO:0045824	negative regulation of innate immune response	8	29	0.0206328
	BP	GO:1903900	regulation of viral life cycle	20	146	0.0222154
	BP	GO:0050716	positive regulation of interleukin-1 secretion	6	16	0.0224043
	CC	GO:0072557	IPAF inflammasome complex	3	3	0.0232769
	BP	GO:1902533	positive regulation of intracellular signal transduction	56	616	0.0241145
	BP	GO:0050727	regulation of inflammatory response	20	148	0.0272996
	BP	GO:0098586	cellular response to virus	7	23	0.0274582
	BP	GO:0042346	positive regulation of NF-kappaB import into nucleus	6	17	0.0278462
	MF	GO:0001730	2'-5'-oligoadenylate synthetase activity	3	3	0.0278884
	BP	GO:0043122	regulation of I-kappaB kinase/NF-kappaB signaling	23	182	0.0282643
	BP	GO:0048870	cell motility	63	711	0.02867
	BP	GO:0051674	localization of cell	63	711	0.02867
	BP	GO:0016477	cell migration	59	654	0.0298333
	BP	GO:0002764	immune response-regulating signaling pathway	47	492	0.0306864
	BP	GO:0002449	lymphocyte mediated immunity	20	149	0.0315249
	MF	GO:0019864	IgG binding	4	7	0.031699
	BP	GO:0039528	cytoplasmic pattern recognition receptor signaling pathway in response to virus	6	17	0.0334412
	BP	GO:0002460	adaptive immune response based on somatic recombination of immune receptors built from immunoglobulin superfamily domains	20	150	0.0344239
	BP	GO:0052548	regulation of endopeptidase activity	25	213	0.0344239
	BP	GO:0032481	positive regulation of type I interferon production	13	76	0.0348864
	BP	GO:0051239	regulation of multicellular organismal process	105	1352	0.0348864
	BP	GO:0002218	activation of innate immune response	27	236	0.0355497
	MF	GO:0061134	peptidase regulator activity	14	88	0.0356333
	BP	GO:0040012	regulation of locomotion	40	401	0.0372595
	BP	GO:0050663	cytokine secretion	15	97	0.0390829
	BP	GO:0009967	positive regulation of signal transduction	74	895	0.0392662
	BP	GO:0002698	negative regulation of immune effector process	12	67	0.0394897
	CC	GO:0043235	receptor complex	22	172	0.0397064
	BP	GO:0007259	JAK-STAT cascade	13	77	0.0409062
	BP	GO:0050691	regulation of defense response to virus by host	14	88	0.0443111
	BP	GO:0032608	interferon-beta production	9	41	0.0452626
	BP	GO:0006821	chloride transport	8	33	0.0495151
	BP	GO:0007249	I-kappaB kinase/NF-kappaB signaling	24	204	0.050471
	CC	GO:0097169	AIM2 inflammasome complex	3	4	0.0529107
	BP	GO:0065007	biological regulation	418	6778	0.0529107
	BP	GO:0002703	regulation of leukocyte mediated immunity	16	112	0.0571394
	MF	GO:0015108	chloride transmembrane transporter activity	7	26	0.0572537
	BP	GO:0051241	negative regulation of multicellular organismal process	47	511	0.0595661
	BP	GO:0031348	negative regulation of defense response	14	92	0.0602736
	BP	GO:0052547	regulation of peptidase activity	25	223	0.0602736
	BP	GO:1902187	negative regulation of viral release from host cell	5	13	0.0637615
	BP	GO:0039530	MDA-5 signaling pathway	4	8	0.0664137
	BP	GO:1902476	chloride transmembrane transport	7	27	0.0738654
	BP	GO:0050707	regulation of cytokine secretion	13	83	0.0748401
	BP	GO:0002757	immune response-activating signal transduction	37	380	0.0748401
	BP	GO:0051240	positive regulation of multicellular organismal process	64	765	0.0839221
	BP	GO:0009617	response to bacterium	29	278	0.0860347
	BP	GO:0045345	positive regulation of MHC class I biosynthetic process	3	4	0.0890553
	BP	GO:0002700	regulation of production of molecular mediator of immune response	11	65	0.0923756
	BP	GO:0030334	regulation of cell migration	34	342	0.097976
	BP	GO:0051270	regulation of cellular component movement	38	398	0.10521
	BP	GO:0044764	multi-organism cellular process	55	667	0.111288
	MF	GO:0004896	cytokine receptor activity	9	47	0.113923
	BP	GO:0051092	positive regulation of NF-kappaB transcription factor activity	14	99	0.124645
	BP	GO:0015698	inorganic anion transport	9	48	0.133052
	BP	GO:0032648	regulation of interferon-beta production	8	39	0.133391
	BP	GO:0044763	single-organism cellular process	441	7317	0.133391
	BP	GO:0044403	symbiosis, encompassing mutualism through parasitism	57	704	0.133391
	BP	GO:0044419	interspecies interaction between organisms	57	704	0.133391
	BP	GO:0016032	viral process	54	659	0.133932
	CC	GO:0072559	NLRP3 inflammasome complex	3	5	0.142278
	BP	GO:0032755	positive regulation of interleukin-6 production	8	41	0.142374
	BP	GO:0023056	positive regulation of signaling	75	959	0.145212
	BP	GO:2000145	regulation of cell motility	35	366	0.149691
	BP	GO:0010647	positive regulation of cell communication	76	977	0.154631
	BP	GO:1903034	regulation of response to wounding	23	213	0.164315
	BP	GO:0010107	potassium ion import	4	10	0.169427
	BP	GO:0002704	negative regulation of leukocyte mediated immunity	7	32	0.169427
	BP	GO:0032966	negative regulation of collagen biosynthetic process	3	5	0.169834
	MF	GO:0015377	cation:chloride symporter activity	3	5	0.171749
	MF	GO:0015379	potassium:chloride symporter activity	3	5	0.171749
	MF	GO:0022820	potassium ion symporter activity	3	5	0.171749
	BP	GO:0019882	antigen processing and presentation	20	181	0.171749
	BP	GO:0002706	regulation of lymphocyte mediated immunity	12	82	0.179926
	BP	GO:0032728	positive regulation of interferon-beta production	6	24	0.179926
	MF	GO:0019865	immunoglobulin binding	4	11	0.18065
	MF	GO:0003725	double-stranded RNA binding	9	51	0.192502
	MF	GO:0061135	endopeptidase regulator activity	10	63	0.195435
	BP	GO:0002702	positive regulation of production of molecular mediator of immune response	8	43	0.210678
	BP	GO:0002474	antigen processing and presentation of peptide antigen via MHC class I	12	89	0.210678
	BP	GO:0044699	single-organism process	476	8021	0.210678
	BP	GO:0002526	acute inflammatory response	10	64	0.215049
	BP	GO:0006953	acute-phase response	5	18	0.215049
	BP	GO:0070893	transposon integration	2	2	0.229081
	BP	GO:0070894	regulation of transposon integration	2	2	0.229081
	BP	GO:0070895	negative regulation of transposon integration	2	2	0.229081
	BP	GO:0098661	inorganic anion transmembrane transport	7	34	0.233943
	MF	GO:0071813	lipoprotein particle binding	4	11	0.23455
	MF	GO:0071814	protein-lipid complex binding	4	11	0.23455
	BP	GO:0030522	intracellular receptor signaling pathway	22	204	0.237298
	CC	GO:0030485	smooth muscle contractile fiber	2	2	0.238056
	BP	GO:0046427	positive regulation of JAK-STAT cascade	7	35	0.240705
	BP	GO:0042993	positive regulation of transcription factor import into nucleus	7	35	0.244367
	BP	GO:0050789	regulation of biological process	395	6475	0.245367
	MF	GO:0003950	NAD+ ADP-ribosyltransferase activity	5	18	0.245367
	BP	GO:0046596	regulation of viral entry into host cell	5	19	0.245367

## Sheet: Up in males
Nr of genes	Ontology	Category	Term	DE genes	Total	p.BH
2675	MF	GO:0003723	RNA binding	583	1332	1.03788e-66
	MF	GO:0044822	poly(A) RNA binding	472	1031	1.14734e-59
	CC	GO:0030529	ribonucleoprotein complex	318	614	1.54913e-50
	CC	GO:0044428	nuclear part	1031	3151	7.52528e-48
	CC	GO:0044446	intracellular organelle part	1663	5802	3.61441e-46
	CC	GO:0070013	intracellular organelle lumen	1065	3302	4.54097e-46
	CC	GO:0031981	nuclear lumen	948	2867	3.19203e-45
	CC	GO:0043233	organelle lumen	1068	3328	4.45005e-45
	CC	GO:0031974	membrane-enclosed lumen	1079	3371	4.45005e-45
	CC	GO:0044422	organelle part	1680	5902	4.45005e-45
	CC	GO:0032991	macromolecular complex	1085	3481	2.93612e-38
	BP	GO:0016071	mRNA metabolic process	262	543	2.10034e-35
	MF	GO:0003676	nucleic acid binding	901	2871	3.12573e-32
	BP	GO:0006396	RNA processing	295	673	4.24544e-31
	BP	GO:0022613	ribonucleoprotein complex biogenesis	180	333	4.60938e-31
	CC	GO:0043231	intracellular membrane-bounded organelle	1969	7500	6.6067e-30
	CC	GO:0005634	nucleus	1391	4935	2.75897e-29
	CC	GO:0043227	membrane-bounded organelle	2092	8118	1.87479e-28
	CC	GO:0005730	nucleolus	295	699	2.8391e-28
	BP	GO:0034641	cellular nitrogen compound metabolic process	1290	4525	4.00637e-27
	CC	GO:0044424	intracellular part	2285	9143	6.69964e-27
	CC	GO:0043229	intracellular organelle	2071	8074	4.27994e-26
	BP	GO:0006412	translation	229	496	4.27994e-26
	CC	GO:0005654	nucleoplasm	757	2407	4.27994e-26
	BP	GO:0043043	peptide biosynthetic process	232	513	6.52018e-25
	CC	GO:0043226	organelle	2170	8597	3.99607e-24
	BP	GO:0044260	cellular macromolecule metabolic process	1555	5760	3.99607e-24
	BP	GO:0006807	nitrogen compound metabolic process	1315	4701	8.8049e-24
	BP	GO:0045047	protein targeting to ER	79	107	2.16409e-23
	CC	GO:0005622	intracellular	2302	9299	2.71137e-23
	BP	GO:0006613	cotranslational protein targeting to membrane	77	103	3.02709e-23
	BP	GO:0072599	establishment of protein localization to endoplasmic reticulum	79	110	2.93465e-22
	BP	GO:0042254	ribosome biogenesis	117	204	2.93733e-22
	BP	GO:0006614	SRP-dependent cotranslational protein targeting to membrane	75	101	3.08719e-22
	BP	GO:0006413	translational initiation	132	237	3.46714e-22
	BP	GO:0006518	peptide metabolic process	244	574	8.32685e-22
	BP	GO:0010467	gene expression	1067	3719	9.76376e-22
	MF	GO:1901363	heterocyclic compound binding	1162	4157	6.20503e-21
	MF	GO:0097159	organic cyclic compound binding	1166	4188	2.77612e-20
	BP	GO:0006397	mRNA processing	174	382	3.25504e-20
	BP	GO:0006139	nucleobase-containing compound metabolic process	1117	3961	3.49342e-20
	BP	GO:0046483	heterocycle metabolic process	1141	4059	3.49342e-20
	BP	GO:0070972	protein localization to endoplasmic reticulum	82	124	6.8112e-20
	BP	GO:0006725	cellular aromatic compound metabolic process	1140	4065	9.14715e-20
	BP	GO:0043604	amide biosynthetic process	235	565	1.16463e-19
	CC	GO:0022626	cytosolic ribosome	67	90	1.16463e-19
	BP	GO:0090304	nucleic acid metabolic process	1021	3587	1.16463e-19
	BP	GO:0008380	RNA splicing	155	326	1.16463e-19
	BP	GO:0000375	RNA splicing, via transesterification reactions	126	245	1.76928e-19
	CC	GO:0043228	non-membrane-bounded organelle	801	2698	3.02404e-19
	CC	GO:0043232	intracellular non-membrane-bounded organelle	801	2698	3.02404e-19
	CC	GO:0044391	ribosomal subunit	91	144	3.02404e-19
	BP	GO:0043170	macromolecule metabolic process	1599	6069	3.11729e-19
	CC	GO:0005681	spliceosomal complex	94	161	3.74201e-19
	BP	GO:0000377	RNA splicing, via transesterification reactions with bulged adenosine as nucleophile	124	242	4.90323e-19
	BP	GO:0000398	mRNA splicing, via spliceosome	124	242	4.90323e-19
	BP	GO:0000184	nuclear-transcribed mRNA catabolic process, nonsense-mediated decay	74	110	1.2883e-18
	BP	GO:0044237	cellular metabolic process	1788	6915	1.38668e-18
	MF	GO:0003735	structural constituent of ribosome	90	144	1.39824e-18
	BP	GO:1901360	organic cyclic compound metabolic process	1160	4178	1.67256e-18
	BP	GO:0000956	nuclear-transcribed mRNA catabolic process	101	179	2.22268e-18
	CC	GO:0005840	ribosome	109	194	2.97699e-18
	CC	GO:0015934	large ribosomal subunit	62	84	3.57783e-18
	CC	GO:0022625	cytosolic large ribosomal subunit	45	52	1.01733e-17
	BP	GO:0006415	translational termination	97	166	1.9205e-17
	BP	GO:0016070	RNA metabolic process	914	3201	2.37789e-17
	BP	GO:0006401	RNA catabolic process	113	217	2.37789e-17
	BP	GO:0006612	protein targeting to membrane	100	180	2.53504e-17
	BP	GO:0006402	mRNA catabolic process	103	192	7.55009e-17
	BP	GO:0006414	translational elongation	104	189	1.60288e-16
	BP	GO:0071826	ribonucleoprotein complex subunit organization	98	186	6.3453e-16
	CC	GO:0044445	cytosolic part	95	173	1.36267e-15
	BP	GO:0019083	viral transcription	94	172	1.97475e-15
	BP	GO:0043603	cellular amide metabolic process	261	695	2.3961e-15
	BP	GO:0022618	ribonucleoprotein complex assembly	93	177	5.50461e-15
	BP	GO:0019080	viral gene expression	96	181	1.00567e-14
	BP	GO:0034660	ncRNA metabolic process	163	384	1.00567e-14
	BP	GO:0044238	primary metabolic process	1745	6836	3.72232e-14
	BP	GO:0043933	macromolecular complex subunit organization	564	1850	3.78934e-14
	BP	GO:0044033	multi-organism metabolic process	98	190	4.37266e-14
	CC	GO:0044451	nucleoplasm part	225	612	1.24975e-13
	BP	GO:0071704	organic substance metabolic process	1775	7006	6.69258e-13
	CC	GO:0043234	protein complex	826	2938	1.49941e-12
	BP	GO:0044265	cellular macromolecule catabolic process	268	767	1.54246e-12
	BP	GO:0006364	rRNA processing	75	138	1.98955e-12
	BP	GO:0071840	cellular component organization or biogenesis	1115	4160	2.42889e-12
	BP	GO:0016072	rRNA metabolic process	76	142	3.34779e-12
	BP	GO:0016482	cytoplasmic transport	292	870	1.80801e-11
	BP	GO:0032984	macromolecular complex disassembly	118	266	3.71346e-11
	BP	GO:0034645	cellular macromolecule biosynthetic process	927	3407	3.71346e-11
	BP	GO:0009059	macromolecule biosynthetic process	948	3497	4.49732e-11
	BP	GO:0043241	protein complex disassembly	114	256	7.82779e-11
	BP	GO:0043624	cellular protein complex disassembly	107	234	7.88387e-11
	BP	GO:0090150	establishment of protein localization to membrane	130	309	7.93683e-11
	BP	GO:0044271	cellular nitrogen compound biosynthetic process	903	3316	1.33746e-10
	BP	GO:0034655	nucleobase-containing compound catabolic process	133	329	5.4402e-10
	BP	GO:0008152	metabolic process	1935	7833	5.78586e-10
	BP	GO:0072594	establishment of protein localization to organelle	185	506	6.39388e-10
	CC	GO:0071013	catalytic step 2 spliceosome	49	84	6.85159e-10
	BP	GO:0034470	ncRNA processing	110	258	8.0947e-10
	BP	GO:0033365	protein localization to organelle	227	662	1.22388e-09
	BP	GO:0044267	cellular protein metabolic process	914	3389	1.67252e-09
	BP	GO:1901566	organonitrogen compound biosynthetic process	307	943	2.18361e-09
	BP	GO:0006996	organelle organization	730	2658	4.48906e-09
	CC	GO:1990234	transferase complex	200	587	1.09615e-08
	BP	GO:0044085	cellular component biogenesis	505	1747	1.40327e-08
	CC	GO:0016604	nuclear body	118	304	1.41228e-08
	BP	GO:0016043	cellular component organization	1060	4050	1.4306e-08
	CC	GO:0005694	chromosome	222	673	1.99797e-08
	BP	GO:0009057	macromolecule catabolic process	289	911	2.3615e-08
	BP	GO:0006605	protein targeting	192	554	3.12539e-08
	BP	GO:0016032	viral process	222	659	3.95764e-08
	BP	GO:0046700	heterocycle catabolic process	134	351	3.99475e-08
	BP	GO:0034622	cellular macromolecular complex assembly	213	634	4.29899e-08
	BP	GO:0044270	cellular nitrogen compound catabolic process	134	352	5.25689e-08
	BP	GO:0051276	chromosome organization	253	799	5.25689e-08
	BP	GO:0019439	aromatic compound catabolic process	135	356	6.05355e-08
	BP	GO:0044764	multi-organism cellular process	223	667	6.95625e-08
	CC	GO:0005737	cytoplasm	1792	7241	9.93554e-08
	CC	GO:1902494	catalytic complex	269	855	1.2646e-07
	BP	GO:0044249	cellular biosynthetic process	1062	4092	2.6006e-07
	CC	GO:0030684	preribosome	29	44	3.15726e-07
	MF	GO:0005488	binding	2160	8990	3.40869e-07
	BP	GO:0042273	ribosomal large subunit biogenesis	25	34	3.84347e-07
	CC	GO:0044464	cell part	2347	9877	4.11223e-07
	BP	GO:1901576	organic substance biosynthetic process	1069	4132	4.65637e-07
	BP	GO:0072657	protein localization to membrane	140	385	5.51278e-07
	BP	GO:1902582	single-organism intracellular transport	371	1260	5.7858e-07
	BP	GO:0044403	symbiosis, encompassing mutualism through parasitism	229	704	5.7858e-07
	BP	GO:0044419	interspecies interaction between organisms	229	704	5.7858e-07
	BP	GO:0046907	intracellular transport	408	1407	5.82424e-07
	CC	GO:0005623	cell	2349	9892	6.00842e-07
	MF	GO:0003743	translation initiation factor activity	30	47	6.32714e-07
	BP	GO:0022411	cellular component disassembly	186	550	6.78932e-07
	BP	GO:0006446	regulation of translational initiation	39	70	6.85134e-07
	BP	GO:1901361	organic cyclic compound catabolic process	134	366	6.94085e-07
	BP	GO:1901564	organonitrogen compound metabolic process	428	1455	7.49829e-07
	MF	GO:0008135	translation factor activity, RNA binding	41	76	7.54543e-07
	BP	GO:0009058	biosynthetic process	1080	4187	7.70335e-07
	BP	GO:1903047	mitotic cell cycle process	226	713	8.07729e-07
	BP	GO:0042255	ribosome assembly	29	44	9.608e-07
	MF	GO:0005198	structural molecule activity	130	354	1.02939e-06
	MF	GO:0043021	ribonucleoprotein complex binding	38	69	1.33457e-06
	BP	GO:0010608	posttranscriptional regulation of gene expression	112	305	1.39574e-06
	BP	GO:0019058	viral life cycle	126	342	1.55012e-06
	BP	GO:0019538	protein metabolic process	955	3677	3.23328e-06
	CC	GO:0044427	chromosomal part	192	598	3.27791e-06
	BP	GO:0000278	mitotic cell cycle	257	845	4.09303e-06
	BP	GO:0006886	intracellular protein transport	258	838	4.37328e-06
	CC	GO:0030532	small nuclear ribonucleoprotein complex	32	56	1.25777e-05
	BP	GO:0006417	regulation of translation	93	249	1.25777e-05
	CC	GO:0098687	chromosomal region	88	236	1.58019e-05
	CC	GO:0032040	small-subunit processome	21	31	1.7177e-05
	BP	GO:0022402	cell cycle process	302	1038	1.90277e-05
	BP	GO:0034248	regulation of cellular amide metabolic process	96	263	2.33982e-05
	BP	GO:0006405	RNA export from nucleus	40	81	2.52984e-05
	CC	GO:0016607	nuclear speck	68	169	3.96859e-05
	CC	GO:0005689	U12-type spliceosomal complex	18	24	4.31863e-05
	BP	GO:0051168	nuclear export	57	135	5.17205e-05
	CC	GO:0044429	mitochondrial part	232	740	5.3953e-05
	BP	GO:0000387	spliceosomal snRNP assembly	24	39	6.06824e-05
	MF	GO:0019843	rRNA binding	26	43	6.12517e-05
	BP	GO:0000245	spliceosomal complex assembly	29	52	6.49036e-05
	CC	GO:0005743	mitochondrial inner membrane	138	395	6.49036e-05
	MF	GO:0004386	helicase activity	53	130	8.09318e-05
	BP	GO:0015031	protein transport	384	1362	8.20143e-05
	CC	GO:0097525	spliceosomal snRNP complex	28	49	9.0979e-05
	BP	GO:0006353	DNA-templated transcription, termination	41	86	9.47485e-05
	BP	GO:0000027	ribosomal large subunit assembly	14	17	0.000104341
	BP	GO:0000380	alternative mRNA splicing, via spliceosome	17	24	0.000105426
	BP	GO:0006403	RNA localization	60	147	0.000107041
	BP	GO:0006369	termination of RNA polymerase II transcription	25	43	0.0001161
	BP	GO:0018205	peptidyl-lysine modification	103	299	0.000121416
	BP	GO:0006354	DNA-templated transcription, elongation	51	117	0.000122703
	BP	GO:0065003	macromolecular complex assembly	317	1100	0.000139939
	BP	GO:0050657	nucleic acid transport	57	139	0.00016661
	BP	GO:0050658	RNA transport	57	139	0.00016661
	BP	GO:0051236	establishment of RNA localization	57	139	0.00016661
	BP	GO:0007005	mitochondrion organization	178	557	0.000176487
	BP	GO:0006325	chromatin organization	173	561	0.000180815
	BP	GO:0031124	mRNA 3'-end processing	37	78	0.000210474
	BP	GO:0071166	ribonucleoprotein complex localization	38	81	0.000243317
	CC	GO:0015030	Cajal body	26	47	0.000248422
	CC	GO:0019866	organelle inner membrane	146	431	0.000270995
	CC	GO:0098798	mitochondrial protein complex	54	123	0.00028568
	MF	GO:0008026	ATP-dependent helicase activity	38	85	0.00028568
	MF	GO:0070035	purine NTP-dependent helicase activity	38	85	0.00028568
	BP	GO:0045184	establishment of protein localization	405	1458	0.000295529
	MF	GO:0003724	RNA helicase activity	29	58	0.000295529
	CC	GO:0071011	precatalytic spliceosome	16	22	0.000315055
	MF	GO:0003729	mRNA binding	46	107	0.000352809
	BP	GO:0032774	RNA biosynthetic process	680	2612	0.000379443
	MF	GO:0004004	ATP-dependent RNA helicase activity	28	56	0.000428079
	MF	GO:0008186	RNA-dependent ATPase activity	28	56	0.000428079
	BP	GO:0071822	protein complex subunit organization	354	1250	0.000453189
	BP	GO:0019438	aromatic compound biosynthetic process	752	2914	0.000545953
	BP	GO:0002181	cytoplasmic translation	21	35	0.000594443
	BP	GO:0018130	heterocycle biosynthetic process	753	2919	0.000598007
	CC	GO:0031967	organelle envelope	258	862	0.000608669
	BP	GO:0006383	transcription from RNA polymerase III promoter	27	52	0.00061881
	MF	GO:0043566	structure-specific DNA binding	73	198	0.00062962
	CC	GO:0031248	protein acetyltransferase complex	38	86	0.000647645
	CC	GO:1902493	acetyltransferase complex	38	86	0.000647645
	BP	GO:0042274	ribosomal small subunit biogenesis	25	45	0.000659802
	BP	GO:0009987	cellular process	2200	9274	0.000677331
	BP	GO:0015931	nucleobase-containing compound transport	62	161	0.000679076
	BP	GO:0031123	RNA 3'-end processing	43	99	0.000703737
	CC	GO:0031975	envelope	258	864	0.000703737
	BP	GO:0007049	cell cycle	372	1350	0.000703737
	BP	GO:0034654	nucleobase-containing compound biosynthetic process	739	2865	0.000703737
	MF	GO:0005515	protein binding	1705	7025	0.00070399
	BP	GO:0070727	cellular macromolecule localization	330	1173	0.000761004
	BP	GO:0016568	chromatin modification	148	481	0.000840567
	BP	GO:0034613	cellular protein localization	328	1166	0.000843749
	BP	GO:0071426	ribonucleoprotein complex export from nucleus	36	79	0.000843749
	CC	GO:0000228	nuclear chromosome	122	376	0.000861672
	BP	GO:1901362	organic cyclic compound biosynthetic process	766	2982	0.000957752
	CC	GO:0005732	small nucleolar ribonucleoprotein complex	13	17	0.0011617
	CC	GO:0044452	nucleolar part	29	58	0.00119303
	BP	GO:0061024	membrane organization	232	788	0.00135023
	CC	GO:0005684	U2-type spliceosomal complex	17	27	0.00149936
	BP	GO:0006281	DNA repair	128	401	0.00150276
	MF	GO:0003697	single-stranded DNA binding	34	75	0.00156145
	BP	GO:0044248	cellular catabolic process	389	1412	0.00168273
	BP	GO:0051123	RNA polymerase II transcriptional preinitiation complex assembly	13	18	0.00168273
	MF	GO:0051082	unfolded protein binding	36	80	0.00170457
	BP	GO:1902580	single-organism cellular localization	264	920	0.00175325
	CC	GO:0022627	cytosolic small ribosomal subunit	21	35	0.00180653
	CC	GO:0070993	translation preinitiation complex	12	16	0.00180653
	BP	GO:0044802	single-organism membrane organization	198	660	0.00185199
	CC	GO:0097526	spliceosomal tri-snRNP complex	15	22	0.00186196
	MF	GO:0016462	pyrophosphatase activity	182	619	0.00243598
	CC	GO:0044454	nuclear chromosome part	113	350	0.00255697
	BP	GO:0006368	transcription elongation from RNA polymerase II promoter	36	82	0.00262233
	CC	GO:0005759	mitochondrial matrix	106	313	0.00284918
	MF	GO:0017111	nucleoside-triphosphatase activity	173	587	0.00291148
	BP	GO:0007067	mitotic nuclear division	107	333	0.00296667
	MF	GO:0016818	hydrolase activity, acting on acid anhydrides, in phosphorus-containing anhydrides	182	621	0.00302178
	MF	GO:0000166	nucleotide binding	451	1712	0.00302178
	MF	GO:1901265	nucleoside phosphate binding	451	1713	0.00322654
	MF	GO:0016817	hydrolase activity, acting on acid anhydrides	182	622	0.00335517
	CC	GO:0000428	DNA-directed RNA polymerase complex	45	112	0.0035605
	CC	GO:0055029	nuclear DNA-directed RNA polymerase complex	45	112	0.0035605
	CC	GO:0034708	methyltransferase complex	33	76	0.00381908
	BP	GO:0032543	mitochondrial translation	47	113	0.00384399
	CC	GO:0031595	nuclear proteasome complex	7	7	0.00394408
	MF	GO:0016887	ATPase activity	103	327	0.00394408
	BP	GO:0007059	chromosome segregation	73	212	0.00424369
	CC	GO:0000784	nuclear chromosome, telomeric region	28	61	0.00439998
	CC	GO:0030880	RNA polymerase complex	45	113	0.00439998
	BP	GO:0051649	establishment of localization in cell	479	1809	0.00441012
	CC	GO:0005740	mitochondrial envelope	175	562	0.00481014
	BP	GO:0001731	formation of translation preinitiation complex	12	17	0.00482105
	CC	GO:0000781	chromosome, telomeric region	36	87	0.00535479
	CC	GO:0016282	eukaryotic 43S preinitiation complex	11	15	0.00537329
	BP	GO:0006376	mRNA splice site selection	15	25	0.00550203
	CC	GO:0033290	eukaryotic 48S preinitiation complex	11	15	0.00550203
	BP	GO:0000470	maturation of LSU-rRNA	8	9	0.00576419
	BP	GO:0070647	protein modification by small protein conjugation or removal	219	769	0.00576668
	BP	GO:0051028	mRNA transport	45	116	0.00630509
	BP	GO:0071702	organic substance transport	473	1786	0.00633764
	CC	GO:0031597	cytosolic proteasome complex	9	11	0.00663853
	CC	GO:0000775	chromosome, centromeric region	56	155	0.00671926
	CC	GO:0044455	mitochondrial membrane part	57	147	0.00675413
	CC	GO:0031966	mitochondrial membrane	165	529	0.00679144
	BP	GO:0006406	mRNA export from nucleus	30	68	0.00715711
	BP	GO:0071427	mRNA-containing ribonucleoprotein complex export from nucleus	30	68	0.00715711
	BP	GO:0033036	macromolecule localization	510	1948	0.00746243
	CC	GO:0044444	cytoplasmic part	1354	5498	0.00750308
	BP	GO:0070897	DNA-templated transcriptional preinitiation complex assembly	13	20	0.00773425
	CC	GO:0030686	90S preribosome	14	23	0.00800683
	BP	GO:0051301	cell division	145	484	0.00802725
	CC	GO:0098800	inner mitochondrial membrane protein complex	40	93	0.00870629
	CC	GO:0015935	small ribosomal subunit	29	60	0.00879638
	BP	GO:0050684	regulation of mRNA processing	33	79	0.00912867
	BP	GO:0048024	regulation of mRNA splicing, via spliceosome	21	42	0.00927515
	CC	GO:0009295	nucleoid	19	37	0.0114558
	CC	GO:0042645	mitochondrial nucleoid	19	37	0.0114558
	BP	GO:0048285	organelle fission	132	438	0.0114666
	BP	GO:0010501	RNA secondary structure unwinding	19	38	0.0114666
	BP	GO:0043484	regulation of RNA splicing	29	67	0.0115592
	BP	GO:2000142	regulation of DNA-templated transcription, initiation	14	24	0.0120063
	CC	GO:0000123	histone acetyltransferase complex	32	78	0.0124357
	BP	GO:0000280	nuclear division	124	409	0.0125536
	MF	GO:0034212	peptide N-acetyltransferase activity	24	54	0.0132463
	MF	GO:0036402	proteasome-activating ATPase activity	6	6	0.0152502
	BP	GO:0008104	protein localization	452	1721	0.0152502
	CC	GO:0034719	SMN-Sm protein complex	11	16	0.015958
	BP	GO:0032784	regulation of DNA-templated transcription, elongation	19	38	0.0178349
	BP	GO:0070925	organelle assembly	124	413	0.0178648
	CC	GO:0016272	prefoldin complex	6	6	0.018063
	CC	GO:0005739	mitochondrion	360	1301	0.018063
	BP	GO:0000463	maturation of LSU-rRNA from tricistronic rRNA transcript (SSU-rRNA, 5.8S rRNA, LSU-rRNA)	7	8	0.018063
	BP	GO:0010565	regulation of cellular ketone metabolic process	48	129	0.0181354
	MF	GO:0036002	pre-mRNA binding	10	15	0.0187622
	CC	GO:0000793	condensed chromosome	57	163	0.0193249
	BP	GO:0000381	regulation of alternative mRNA splicing, via spliceosome	11	17	0.0197069
	CC	GO:0000315	organellar large ribosomal subunit	17	31	0.0207185
	CC	GO:0005762	mitochondrial large ribosomal subunit	17	31	0.0207185
	BP	GO:0006399	tRNA metabolic process	53	146	0.0210943
	BP	GO:0070126	mitochondrial translational termination	35	82	0.0215614
	MF	GO:0043022	ribosome binding	18	36	0.0227648
	BP	GO:0071824	protein-DNA complex subunit organization	53	147	0.0230975
	BP	GO:0032446	protein modification by small protein conjugation	194	686	0.0230975
	BP	GO:0008150	biological_process	2360	10081	0.0247022
	BP	GO:0065004	protein-DNA complex assembly	46	123	0.0247268
	CC	GO:0035145	exon-exon junction complex	12	20	0.0263858
	MF	GO:0042162	telomeric DNA binding	9	13	0.0267054
	BP	GO:0006974	cellular response to DNA damage stimulus	183	639	0.0276585
	BP	GO:0022904	respiratory electron transport chain	43	108	0.0277097
	BP	GO:0007004	telomere maintenance via telomerase	11	18	0.0277097
	CC	GO:0034709	methylosome	8	10	0.0277097
	BP	GO:1902589	single-organism organelle organization	480	1863	0.0283476
	CC	GO:0005685	U1 snRNP	11	17	0.0283476
	BP	GO:0070125	mitochondrial translational elongation	34	80	0.0285005
	BP	GO:0070124	mitochondrial translational initiation	34	80	0.0293351
	BP	GO:0033554	cellular response to stress	389	1474	0.029655
	BP	GO:0051603	proteolysis involved in cellular protein catabolic process	146	500	0.0297436
	BP	GO:0000462	maturation of SSU-rRNA from tricistronic rRNA transcript (SSU-rRNA, 5.8S rRNA, LSU-rRNA)	14	25	0.03139
	CC	GO:0042382	paraspeckles	5	5	0.0317012
	BP	GO:0051171	regulation of nitrogen compound metabolic process	716	2870	0.0325635
	BP	GO:0022900	electron transport chain	43	109	0.0327822
	BP	GO:0006913	nucleocytoplasmic transport	100	326	0.0330761
	CC	GO:0005852	eukaryotic translation initiation factor 3 complex	10	15	0.0335946
	BP	GO:0016925	protein sumoylation	36	94	0.0338308
	BP	GO:0051169	nuclear transport	101	330	0.0339518
	BP	GO:0006278	RNA-dependent DNA replication	12	21	0.0347719
	MF	GO:0036094	small molecule binding	476	1862	0.0351072
	MF	GO:0004402	histone acetyltransferase activity	21	48	0.0351281
	CC	GO:0016591	DNA-directed RNA polymerase II, holoenzyme	35	90	0.0366693
	BP	GO:0022607	cellular component assembly	413	1581	0.0367617
	BP	GO:0045898	regulation of RNA polymerase II transcriptional preinitiation complex assembly	9	13	0.0387452
	CC	GO:0005669	transcription factor TFIID complex	11	18	0.0396099
	BP	GO:0000460	maturation of 5.8S rRNA	13	23	0.0398613
	CC	GO:0070603	SWI/SNF superfamily-type complex	26	64	0.0399703
	BP	GO:0030490	maturation of SSU-rRNA	16	31	0.0405714
	BP	GO:0051641	cellular localization	528	2063	0.0406287
	BP	GO:0044770	cell cycle phase transition	125	422	0.0411144
	BP	GO:1901575	organic substance catabolic process	349	1304	0.0415126
	BP	GO:1903311	regulation of mRNA metabolic process	34	89	0.0415126
	CC	GO:0005838	proteasome regulatory particle	12	20	0.0417016
	BP	GO:1903050	regulation of proteolysis involved in cellular protein catabolic process	80	250	0.042396
	BP	GO:0006259	DNA metabolic process	199	712	0.0426859
	BP	GO:0043632	modification-dependent macromolecule catabolic process	136	466	0.0432873
	BP	GO:0042773	ATP synthesis coupled electron transport	25	55	0.0443386
	BP	GO:0042775	mitochondrial ATP synthesis coupled electron transport	25	55	0.0443386
	BP	GO:2000112	regulation of cellular macromolecule biosynthetic process	652	2614	0.0448075
	BP	GO:0008334	histone mRNA metabolic process	13	24	0.0448075
	MF	GO:0017069	snRNA binding	14	26	0.0448075
	CC	GO:0000785	chromatin	100	330	0.0449611
	BP	GO:0098781	ncRNA transcription	16	32	0.0451784
	BP	GO:0006260	DNA replication	77	244	0.0452235
	MF	GO:0061733	peptide-lysine-N-acetyltransferase activity	21	49	0.0460414
	CC	GO:0005832	chaperonin-containing T-complex	7	9	0.0463557
	BP	GO:0006457	protein folding	63	185	0.0498864
	BP	GO:0032790	ribosome disassembly	6	7	0.0514902
	MF	GO:0008312	7S RNA binding	6	7	0.0520128
	BP	GO:0016573	histone acetylation	42	120	0.0526873
	BP	GO:2000144	positive regulation of DNA-templated transcription, initiation	11	19	0.0527586
	BP	GO:0050686	negative regulation of mRNA processing	14	27	0.0532489
	BP	GO:0070585	protein localization to mitochondrion	53	152	0.0543796
	CC	GO:0045263	proton-transporting ATP synthase complex, coupling factor F(o)	8	11	0.0567217
	CC	GO:0061695	transferase complex, transferring phosphorus-containing groups	67	208	0.0583155
	BP	GO:0044257	cellular protein catabolic process	149	521	0.0598749
	CC	GO:0000276	mitochondrial proton-transporting ATP synthase complex, coupling factor F(o)	6	7	0.0639982
	BP	GO:0031326	regulation of cellular biosynthetic process	686	2766	0.0653994
	MF	GO:0016407	acetyltransferase activity	30	79	0.0668786
	BP	GO:0006473	protein acetylation	49	146	0.0690988
	CC	GO:0005643	nuclear pore	26	65	0.0701142
	BP	GO:0006310	DNA recombination	66	206	0.0702416
	BP	GO:0044772	mitotic cell cycle phase transition	119	405	0.0711529
	BP	GO:0007080	mitotic metaphase plate congression	15	31	0.0711529
	BP	GO:0019941	modification-dependent protein catabolic process	132	458	0.0769802
	CC	GO:0000502	proteasome complex	28	68	0.0806927
	BP	GO:0008156	negative regulation of DNA replication	15	32	0.0823667
	CC	GO:0035267	NuA4 histone acetyltransferase complex	10	17	0.0823667
	CC	GO:0043189	H4/H2A histone acetyltransferase complex	10	17	0.0823667
	CC	GO:1902562	H4 histone acetyltransferase complex	10	17	0.0823667
	BP	GO:1903312	negative regulation of mRNA metabolic process	15	31	0.0823667
	CC	GO:0035770	ribonucleoprotein granule	40	114	0.0838529
	BP	GO:0006997	nucleus organization	39	112	0.0838529
	BP	GO:0006475	internal protein amino acid acetylation	43	126	0.0838529
	BP	GO:0006275	regulation of DNA replication	30	81	0.084403
	CC	GO:0000782	telomere cap complex	7	10	0.0846626
	CC	GO:0000783	nuclear telomere cap complex	7	10	0.0846626
	BP	GO:0006511	ubiquitin-dependent protein catabolic process	130	452	0.085465
	BP	GO:0072655	establishment of protein localization to mitochondrion	51	148	0.0866841
	BP	GO:0018393	internal peptidyl-lysine acetylation	42	123	0.0893023
	BP	GO:0000028	ribosomal small subunit assembly	10	16	0.0913193
	BP	GO:0009056	catabolic process	415	1595	0.0928939
	MF	GO:0042623	ATPase activity, coupled	74	243	0.100253
	BP	GO:0016570	histone modification	95	325	0.102237
	BP	GO:0051053	negative regulation of DNA metabolic process	25	64	0.102393
	BP	GO:0043044	ATP-dependent chromatin remodeling	22	53	0.104589
	BP	GO:0010468	regulation of gene expression	692	2807	0.104649
	CC	GO:0005829	cytosol	606	2407	0.104774
	BP	GO:0010556	regulation of macromolecule biosynthetic process	662	2680	0.10544
	BP	GO:0009889	regulation of biosynthetic process	689	2794	0.107772
	BP	GO:0000012	single strand break repair	6	8	0.109639
	CC	GO:0008540	proteasome regulatory particle, base subcomplex	8	12	0.111446
	BP	GO:0018394	peptidyl-lysine acetylation	43	128	0.111939
	MF	GO:1990247	N6-methyladenosine-containing RNA binding	4	4	0.113823
	BP	GO:0033119	negative regulation of RNA splicing	11	20	0.114519
	MF	GO:0005047	signal recognition particle binding	4	4	0.121045
	CC	GO:0070187	telosome	5	6	0.122166
	BP	GO:0019042	viral latency	7	10	0.122166
	BP	GO:0019043	establishment of viral latency	7	10	0.122166
	CC	GO:0046540	U4/U6 x U5 tri-snRNP complex	10	17	0.123928
	BP	GO:1903362	regulation of cellular protein catabolic process	81	264	0.125076
	BP	GO:0051172	negative regulation of nitrogen compound metabolic process	259	987	0.126314
	BP	GO:0045899	positive regulation of RNA polymerase II transcriptional preinitiation complex assembly	7	10	0.126737
	CC	GO:0071010	prespliceosome	11	20	0.127631
	BP	GO:0000395	mRNA 5'-splice site recognition	4	4	0.127776
	MF	GO:0017025	TBP-class protein binding	9	15	0.127776
	BP	GO:0045292	mRNA cis splicing, via spliceosome	8	13	0.127776
	CC	GO:0031414	N-terminal protein acetyltransferase complex	6	8	0.127986
	BP	GO:0016569	covalent chromatin modification	96	332	0.131442
	MF	GO:0008080	N-acetyltransferase activity	25	66	0.132679
	CC	GO:0070469	respiratory chain	28	68	0.134339
	CC	GO:0032777	Piccolo NuA4 histone acetyltransferase complex	4	4	0.134339
	CC	GO:0005746	mitochondrial respiratory chain	26	62	0.135924
	BP	GO:2000104	negative regulation of DNA-dependent DNA replication	7	11	0.136637
	BP	GO:0060260	regulation of transcription initiation from RNA polymerase II promoter	10	18	0.137593
	CC	GO:0005686	U2 snRNP	10	17	0.138751
	CC	GO:0071204	histone pre-mRNA 3'end processing complex	5	6	0.144165
	MF	GO:0004576	oligosaccharyl transferase activity	6	8	0.144165
	BP	GO:0006360	transcription from RNA polymerase I promoter	20	48	0.146783
	BP	GO:0075713	establishment of integrated proviral latency	6	8	0.148699
	CC	GO:0035097	histone methyltransferase complex	23	60	0.148699
	MF	GO:0003727	single-stranded RNA binding	20	49	0.151394
	BP	GO:0043543	protein acylation	55	174	0.156938
	BP	GO:0000070	mitotic sister chromatid segregation	36	105	0.157809
	CC	GO:0005786	signal recognition particle, endoplasmic reticulum targeting	5	6	0.160212
	CC	GO:0048500	signal recognition particle	5	6	0.160212
	MF	GO:0001056	RNA polymerase III activity	10	18	0.160541
	CC	GO:0005666	DNA-directed RNA polymerase III complex	10	18	0.160541
	BP	GO:0006385	transcription elongation from RNA polymerase III promoter	10	18	0.160541
	BP	GO:0006386	termination of RNA polymerase III transcription	10	18	0.160541
	CC	GO:0022624	proteasome accessory complex	12	23	0.163719
	BP	GO:0006120	mitochondrial electron transport, NADH to ubiquinone	18	39	0.166932
	CC	GO:0005687	U4 snRNP	7	10	0.17305
	CC	GO:0031519	PcG protein complex	16	37	0.173254
	MF	GO:0003954	NADH dehydrogenase activity	17	36	0.173254
	MF	GO:0008137	NADH dehydrogenase (ubiquinone) activity	17	36	0.173254
	MF	GO:0050136	NADH dehydrogenase (quinone) activity	17	36	0.173254
	BP	GO:0006119	oxidative phosphorylation	27	67	0.179521
	BP	GO:0006333	chromatin assembly or disassembly	40	116	0.180228
	MF	GO:0003690	double-stranded DNA binding	32	90	0.183852
	BP	GO:0045333	cellular respiration	55	163	0.186518
	BP	GO:0048025	negative regulation of mRNA splicing, via spliceosome	9	16	0.187627
	BP	GO:0042787	protein ubiquitination involved in ubiquitin-dependent protein catabolic process	48	146	0.191558
	BP	GO:0009892	negative regulation of metabolic process	435	1721	0.192289
	CC	GO:0097346	INO80-type complex	11	22	0.198155
	CC	GO:0031304	intrinsic component of mitochondrial inner membrane	10	18	0.198155
	CC	GO:0031305	integral component of mitochondrial inner membrane	10	18	0.198155
	BP	GO:0090501	RNA phosphodiester bond hydrolysis	33	93	0.198155
	BP	GO:0000291	nuclear-transcribed mRNA catabolic process, exonucleolytic	14	30	0.199799
	CC	GO:0000313	organellar ribosome	27	68	0.201791
	CC	GO:0005761	mitochondrial ribosome	27	68	0.201791
	BP	GO:0008033	tRNA processing	34	95	0.205266
	BP	GO:0051569	regulation of histone H3-K4 methylation	9	17	0.205266
	CC	GO:0034715	pICln-Sm protein complex	5	6	0.20599
	BP	GO:0070534	protein K63-linked ubiquitination	16	37	0.208264
	BP	GO:0061136	regulation of proteasomal protein catabolic process	61	197	0.208834
	BP	GO:0045910	negative regulation of DNA recombination	8	14	0.20985
	BP	GO:0006366	transcription from RNA polymerase II promoter	332	1304	0.20985
	BP	GO:0031396	regulation of protein ubiquitination	70	226	0.210607
	BP	GO:0006302	double-strand break repair	48	151	0.212872
	BP	GO:1900034	regulation of cellular response to heat	25	68	0.214318
	CC	GO:0016281	eukaryotic translation initiation factor 4F complex	6	9	0.220777
	BP	GO:0000819	sister chromatid segregation	37	111	0.222707
	BP	GO:0071103	DNA conformation change	54	171	0.222867
	CC	GO:0098803	respiratory chain complex	23	55	0.22739
	BP	GO:0098813	nuclear chromosome segregation	47	147	0.22802
	CC	GO:0000178	exosome (RNase complex)	10	19	0.234593
	BP	GO:0006303	double-strand break repair via nonhomologous end joining	12	26	0.242185
	BP	GO:0006458	'de novo' protein folding	19	45	0.242403
	BP	GO:0010833	telomere maintenance via telomere lengthening	17	41	0.24241
	BP	GO:0034728	nucleosome organization	36	103	0.243028
	BP	GO:0006356	regulation of transcription from RNA polymerase I promoter	9	17	0.243463
