# Supplementary material for: Genome-wide analysis of differential transcriptional and epigenetic variability across human immune cell types
Source: Genome Biol. 2017 Jan 26;18:18. doi: 10.1186/s13059-017-1156-8 (PMC5270224; doi:10.1186/s13059-017-1156-8)
Supplement: Additional file 9: — Correlation of cell type-specific hypervariable DNA methylation with donor information. Correlation of cell type-specific hypervariable DNA methylation with donor information. (XLSX 118 kb) [file 13059_2017_1156_MOESM9_ESM.xlsx]

## Sheet: Monocytes
			Age at visit		BMI		Alcohol units per week		Monocyte count		Monocyte percent		Maximum temperature		Minimum temperature		Daylight
Probe ID	HGNC symbol	Feature	rho	p.BH	rho	p.BH	rho	p.BH	rho	p.BH	rho	p.BH	rho	p.BH	rho	p.BH	rho	p.BH
cg00183186	HTR1B	TSS1500	0.193818	0.391602	-0.0411676	0.997324	-0.0196804	0.985675	-0.00353974	0.993115	0.0218738	0.998434	-0.156135	0.319343	-0.160437	0.330564	-0.0699226	0.800511
cg00204512	NA	IGR	-0.0556871	0.8557	-0.124796	0.996974	-0.111288	0.985675	-0.188571	0.605137	-0.019629	0.998434	0.0151929	0.957565	-0.0207447	0.931279	0.040685	0.851529
cg00335219	NA	IGR	0.0760127	0.802793	-0.022311	0.997324	0.0856829	0.985675	-0.12553	0.739615	-0.0719204	0.959638	-0.109782	0.500568	-0.10471	0.513511	-0.116012	0.547761
cg00704970	RPTOR	Body	-0.0941916	0.802793	-0.00414181	0.997324	-0.0389301	0.985675	-0.139308	0.739615	-0.00685049	0.999322	0.0119196	0.961092	-0.051786	0.793171	-0.0432647	0.851529
cg01268901	WNT5B	Body	-0.00142393	0.995938	-0.0544377	0.997324	0.00512742	0.985675	-0.184138	0.605137	-0.149888	0.959638	-0.244796	0.0561968	-0.212065	0.12752	-0.284137	0.0423452
cg01285164	GXYLT2	TSS1500	-0.12037	0.675978	-0.0338161	0.997324	-0.0115068	0.985675	-0.12432	0.739615	0.00184486	0.999322	0.0770224	0.693497	0.0874516	0.595879	0.0990666	0.678207
cg01561304	COL23A1	Body	-0.0758558	0.802793	0.00527775	0.997324	-0.00595674	0.985675	0.0377336	0.993115	0.0577969	0.959638	-0.123488	0.441505	-0.119593	0.474895	-0.119475	0.531984
cg01582066	NA	IGR	-0.0167058	0.978782	0.0225149	0.997324	-0.0170249	0.985675	-0.21746	0.458849	-0.0896691	0.959638	-0.0230135	0.957141	-0.0612313	0.714961	-0.107154	0.633223
cg01718736	LSM5	Body	-0.00468698	0.995938	0.00594184	0.997324	-0.117811	0.985675	-0.0386823	0.993115	-0.101493	0.959638	-0.0228749	0.957141	-0.113427	0.495163	-0.0384148	0.856054
cg01858712	SNX29	Body	0.00225738	0.995938	-0.102217	0.996974	-0.109494	0.985675	-0.0567682	0.993115	-0.0705787	0.959638	-0.190258	0.16402	-0.165842	0.31249	-0.182581	0.230022
cg02635260	NA	IGR	0.0496346	0.873792	-0.117619	0.996974	0.201811	0.985675	0.128141	0.739615	0.0902464	0.959638	0.0548829	0.809919	0.021825	0.931279	0.04884	0.828966
cg02844852	NA	IGR	0.0541678	0.8557	0.040987	0.997324	-0.20776	0.985675	0.0290762	0.993115	0.0197226	0.998434	-0.0887936	0.641053	-0.148954	0.377854	-0.0201764	0.918951
cg02956542	PGLYRP4	TSS1500	0.0463254	0.88982	-0.0767604	0.996974	0.0091863	0.985675	-0.0299507	0.993115	0.0603223	0.959638	-0.0726493	0.7053	-0.0784707	0.642241	-0.13229	0.483625
cg03171478	NA	IGR	0.119364	0.675978	-0.0847703	0.996974	0.0212672	0.985675	-0.0172502	0.993115	0.0516947	0.959638	-0.162343	0.283968	-0.122911	0.456608	-0.0590427	0.828966
cg03181524	RYR1	Body	0.0787498	0.802793	-0.0083477	0.997324	0.0527654	0.985675	-0.128115	0.739615	-0.0641959	0.959638	0.0462044	0.834059	0.0569875	0.74889	-0.0281122	0.904461
cg03238090	NA	IGR	0.138635	0.669786	0.00369909	0.997324	0.157475	0.985675	0.0194057	0.993115	0.0991837	0.959638	-0.0575596	0.809919	-0.0760779	0.644774	-0.13387	0.483625
cg03270167	RAMP1	Body	-0.133819	0.675978	-0.088382	0.996974	0.0223996	0.985675	0.10403	0.811485	0.116184	0.959638	-0.0249388	0.957141	0.0615376	0.714961	-0.0520614	0.828966
cg03502889	ABTB2	Body	0.0386645	0.931235	-0.203071	0.835004	-0.0213709	0.985675	-0.0590011	0.993115	-0.0569326	0.959638	0.0270383	0.957141	0.0174587	0.936006	0.0224433	0.915185
cg03801286	KCNE1	TSS1500	0.0264734	0.945931	-0.126031	0.996974	0.0155736	0.985675	-0.0774194	0.957322	-0.0661665	0.959638	-0.327456	0.0255203	-0.290494	0.0217697	-0.284447	0.0423452
cg04751149	MEIS1	Body	0.000187602	0.998343	-0.000337869	0.997324	-0.00301425	0.985675	0.0261851	0.993115	0.0561456	0.959638	-0.110343	0.500568	-0.0999894	0.520112	-0.000902892	0.992092
cg05388840	HIVEP3	Body	0.206971	0.391602	0.00173595	0.997324	-0.113736	0.985675	-0.113972	0.772034	-0.0746684	0.959638	-0.0841368	0.666272	-0.105097	0.513511	-0.0389792	0.856054
cg05482413	MOXD2	Body	0.00282326	0.995938	-0.049859	0.997324	-0.0861694	0.985675	-0.00767966	0.993115	0.0170907	0.998434	-0.0813697	0.667701	-0.0782321	0.642241	-0.126334	0.517975
cg05573434	SORCS2	Body	-0.0632157	0.8557	-0.0476745	0.997324	-0.154716	0.985675	-0.238663	0.306191	-0.17947	0.959638	0.0864975	0.654923	0.118761	0.474895	-0.021463	0.915432
cg05576959	DGKZ	TSS200	0.0375235	0.932982	-0.0260451	0.997324	-0.0672864	0.985675	-0.0638929	0.993115	-0.0798707	0.959638	-0.259567	0.0561968	-0.20926	0.12752	-0.143534	0.454976
cg05620821	ALDH3B1	TSS200	-0.0567635	0.8557	0.0672185	0.996974	-0.0791919	0.985675	-0.126576	0.739615	-0.130162	0.959638	-0.106257	0.524572	-0.101937	0.514406	-0.127282	0.517975
cg05628049	NA	IGR	0.072805	0.805068	0.0524105	0.997324	-0.000829318	0.99374	-0.0101481	0.993115	0.0473083	0.959638	-0.241174	0.0561968	-0.206702	0.12752	-0.12231	0.531984
cg05795390	ATP1A2	3'UTR	-0.0704092	0.808299	0.021344	0.997324	0.130881	0.985675	0.0764062	0.957322	0.0907367	0.959638	-0.0460432	0.834059	-0.0486129	0.805171	-0.132928	0.483625
cg05844788	GHRL	TSS1500	0.0758989	0.802793	-0.00641369	0.997324	-0.086297	0.985675	0.036843	0.993115	0.0386227	0.990924	-0.241365	0.0561968	-0.226831	0.097251	-0.227526	0.110925
cg05871756	NA	IGR	0.00192215	0.995938	-0.109976	0.996974	0.15513	0.985675	-0.138021	0.739615	-0.0526946	0.959638	-0.259134	0.0561968	-0.269785	0.0331148	-0.28977	0.0423452
cg06130787	KLK10	TSS1500	0.0056865	0.995938	0.0537037	0.997324	0.0274712	0.985675	-0.172163	0.605137	0.0595837	0.959638	-0.0775804	0.693497	0.0882578	0.595879	0.078887	0.764996
cg06153925	RPTOR	Body	-0.123076	0.675978	-0.0289636	0.997324	0.0841918	0.985675	-0.0342003	0.993115	-0.116671	0.959638	0.0231522	0.957141	0.0130441	0.942527	0.00256679	0.992092
cg06512774	TTC3	1stExon	0.0913899	0.802793	-0.146268	0.996974	-0.0353018	0.985675	0.154971	0.739615	0.134797	0.959638	-0.0171376	0.957565	0.0317249	0.882514	0.0284024	0.904461
cg07093324	ACTR3	Body	0.0594453	0.8557	0.0258412	0.997324	-0.011132	0.985675	-0.034836	0.993115	0.000986934	0.999322	0.00444404	0.961092	-0.0176877	0.936006	0.0558697	0.828966
cg07211972	CBS	3'UTR	-0.257181	0.221561	0.0113011	0.997324	0.157331	0.985675	-0.0565101	0.993115	-0.0949489	0.959638	-0.22513	0.0692917	-0.154887	0.364197	-0.165384	0.316075
cg07451762	NA	IGR	-0.0346326	0.937486	-0.151558	0.996974	-0.132691	0.985675	-0.172983	0.605137	-0.0732557	0.959638	0.032037	0.942513	0.0271136	0.91444	0.0419393	0.851529
cg07507418	TRERF1	5'UTR	-0.00574493	0.995938	-0.202518	0.835004	0.0480207	0.985675	-0.0436676	0.993115	0.00694402	0.999322	-0.226788	0.0692917	-0.193926	0.172173	-0.216836	0.13368
cg08394278	DOK3	TSS200	-0.0256861	0.945931	0.0414997	0.997324	-0.0307725	0.985675	-0.190543	0.605137	-0.151804	0.959638	-0.146734	0.352122	-0.191243	0.173447	-0.0174452	0.936134
cg08872924	NA	IGR	0.152797	0.624921	0.0704225	0.996974	-0.0479968	0.985675	-0.15056	0.739615	-0.130188	0.959638	0.114248	0.489883	0.109576	0.5025	0.0530836	0.828966
cg09225373	NA	IGR	0.094453	0.802793	-0.0153672	0.997324	-0.0587062	0.985675	-0.0376078	0.993115	0.00245766	0.999322	-0.172214	0.246213	-0.129167	0.451863	-0.0915339	0.704568
cg09560590	HMHB1	TSS200	0.186965	0.391602	-0.127546	0.996974	0.155378	0.985675	-0.0547805	0.993115	0.00953069	0.999322	0.140271	0.365259	0.144471	0.396451	0.135582	0.483625
cg10549753	MIR492	TSS1500	0.14036	0.669786	0.111328	0.996974	-0.0987288	0.985675	0.0888227	0.915347	-0.00162554	0.999322	0.0889936	0.641053	0.101534	0.514406	-0.0525064	0.828966
cg10718614	NA	IGR	0.0746779	0.802793	-0.115097	0.996974	-0.00952919	0.985675	-0.0278694	0.993115	-0.000135462	0.999322	-0.285079	0.0358785	-0.293522	0.0217697	-0.204773	0.154369
cg10819238	SBNO2	5'UTR	0.0545061	0.8557	-0.148529	0.996974	0.00358042	0.985675	-0.104995	0.811485	0.0294693	0.998434	-0.24618	0.0561968	-0.277556	0.0314697	-0.2099	0.144773
cg11051139	KRT80	Body	-0.0961876	0.802793	-0.0756478	0.996974	0.00949729	0.985675	-0.0998647	0.815312	0.0165037	0.998434	-0.183828	0.188189	-0.123962	0.456608	-0.0716284	0.800511
cg11212178	MIR492	TSS1500	0.104045	0.802793	0.0207615	0.997324	-0.173431	0.985675	0.00943501	0.993115	-0.0828702	0.959638	-0.0112584	0.961092	0.0354398	0.882514	-0.05764	0.828966
cg11241750	GRAMD3	TSS1500	0.197859	0.391602	0.00810304	0.997324	0.071138	0.985675	0.00175535	0.993115	0.0230123	0.998434	0.0256322	0.957141	-0.0460686	0.805687	-0.100315	0.678207
cg11518509	NA	IGR	0.145349	0.667144	0.110553	0.996974	-0.00917035	0.985675	0.0373335	0.993115	0.0695918	0.959638	-0.251153	0.0561968	-0.252355	0.0517363	-0.211551	0.144773
cg11636960	LOC401127	Body	-0.0785807	0.802793	0.000343695	0.997324	0.0561863	0.985675	-0.118312	0.764368	-0.0800513	0.959638	-0.219519	0.0748055	-0.103479	0.513819	-0.0754979	0.787311
cg11658419	NA	IGR	0.157776	0.615165	-0.0661933	0.996974	-0.0133648	0.985675	0.049408	0.993115	0.130617	0.959638	-0.192677	0.159661	-0.207889	0.12752	-0.0900861	0.704568
cg12067024	S100A7A	TSS1500	-0.0209407	0.970659	0.00292432	0.997324	-0.0250151	0.985675	-0.0622053	0.993115	0.0242992	0.998434	-0.0238843	0.957141	0.00926466	0.952641	-0.0291666	0.904461
cg12829045	NA	IGR	-0.0405528	0.921078	-0.0544727	0.997324	0.279688	0.405512	0.00686652	0.993115	0.0501466	0.959638	-0.00770128	0.961092	-0.00820695	0.952641	0.0234688	0.915185
cg12940993	RNASE1	TSS200	0.104544	0.802793	-0.194677	0.835004	0.141335	0.985675	-0.111926	0.772034	0.0715753	0.959638	-0.0525093	0.818872	-0.0747236	0.644774	-0.00193477	0.992092
cg13247398	DGKZ	TSS200	0.122418	0.675978	0.024845	0.997324	-0.0704043	0.985675	-0.00535318	0.993115	0.0258248	0.998434	-0.226891	0.0692917	-0.193087	0.172173	-0.168909	0.301361
cg13303520	BSDC1	Body	0.0204025	0.970659	-0.072607	0.996974	-0.0860418	0.985675	-0.0958474	0.833441	-0.0820768	0.959638	-0.224775	0.0692917	-0.224396	0.0981988	-0.26122	0.058819
cg13368983	CFLAR	Body	-0.027719	0.945931	0.194834	0.835004	-0.00564574	0.985675	-0.0159079	0.993115	0.0672631	0.959638	0.00701435	0.961092	0.0359461	0.882514	0.034684	0.875401
cg13500029	GLIPR1	TSS1500	0.137605	0.669786	-0.0816595	0.996974	0.0755238	0.985675	-0.0236198	0.993115	0.145473	0.959638	-0.0834563	0.666272	-0.0720503	0.650933	-0.0347839	0.875401
cg14101659	EXOC2	Body	0.128311	0.675978	-0.0411968	0.997324	-0.0150075	0.985675	-0.0814528	0.922197	-0.124721	0.959638	-0.105173	0.525379	-0.140692	0.396451	-0.0955421	0.700009
cg14143723	NA	IGR	0.00723344	0.995938	0.0482629	0.997324	0.0112676	0.985675	0.0432901	0.993115	0.00345427	0.999322	-0.0493327	0.818872	-0.0040148	0.964847	-0.0532932	0.828966
cg14522298	NA	IGR	0.074069	0.802793	-0.0935549	0.996974	0.185711	0.985675	-0.0826887	0.922197	0.104986	0.959638	-0.125049	0.437236	-0.0965776	0.543374	-0.142199	0.454976
cg14598846	PLEC1	Body	0.0587963	0.8557	-0.117526	0.996974	0.0132611	0.985675	-0.0868544	0.922197	-0.00733428	0.999322	0.0494197	0.818872	-0.0149273	0.942527	0.087329	0.704568
cg14663914	AZU1	TSS200	0.0341805	0.937486	-0.101751	0.996974	0.0480845	0.985675	-0.0476397	0.993115	-0.073775	0.959638	-0.254455	0.0561968	-0.260713	0.0419538	-0.298857	0.0423452
cg15052890	MED11	3'UTR	0.193258	0.391602	0.139441	0.996974	-0.119709	0.985675	-0.0110936	0.993115	-0.0928138	0.959638	-0.0721108	0.7053	-0.0470134	0.805171	-0.120078	0.531984
cg15128679	NA	IGR	0.197422	0.391602	-0.133185	0.996974	0.126814	0.985675	-0.0957602	0.833441	0.0411642	0.976835	0.0067628	0.961092	-0.00890027	0.952641	-0.0414202	0.851529
cg15164194	WDFY4	TSS1500	0.0290476	0.945931	-0.0501445	0.997324	0.0328538	0.985675	-0.00655353	0.993115	-0.0161006	0.998434	-0.220177	0.0748055	-0.213922	0.12752	-0.253036	0.0694178
cg15299835	KLC2	3'UTR	0.245516	0.225601	0.0231615	0.997324	-0.0035246	0.985675	-0.072134	0.962671	0.0470987	0.959638	-0.144438	0.360612	-0.122988	0.456608	-0.0668302	0.807969
cg15367247	DGKG	Body	-0.0417215	0.919019	-0.0743487	0.996974	0.122205	0.985675	-0.0385145	0.993115	-0.0596676	0.959638	0.136166	0.38001	0.0938624	0.560437	0.0483789	0.828966
cg15368872	KLRK1	3'UTR	0.124257	0.675978	-0.0502552	0.997324	0.0693677	0.985675	0.0362525	0.993115	-0.0158393	0.998434	0.015954	0.957565	0.0088132	0.952641	-0.052458	0.828966
cg15618908	NA	IGR	-0.0429455	0.916358	-0.0373054	0.997324	-0.194076	0.985675	-0.107967	0.807203	-0.0946812	0.959638	-0.0108263	0.961092	0.0473681	0.805171	-0.0228077	0.915185
cg15648896	C15orf54	TSS200	0.0840765	0.802793	-0.0247751	0.997324	-0.0553729	0.985675	0.0174148	0.993115	0.0657311	0.959638	-0.0694502	0.72359	-0.0320958	0.882514	-0.0872549	0.704568
cg15691325	CYBRD1	Body	0.00909101	0.995938	0.0837566	0.996974	-0.0823098	0.985675	0.0182989	0.993115	0.0435412	0.973738	0.023981	0.957141	-0.00475326	0.964847	0.0615128	0.828966
cg15858970	LOC100287718	TSS1500	0.0870474	0.802793	-0.0446978	0.997324	0.0328617	0.985675	-0.0473945	0.993115	-0.0468375	0.959638	-0.0093944	0.961092	0.0328891	0.882514	0.0426488	0.851529
cg16055526	HLA-DPB2	Body	0.0569603	0.8557	-0.00690885	0.997324	0.0169612	0.985675	0.0436934	0.993115	-0.053588	0.959638	0.0159766	0.957565	0.110596	0.502443	0.0159296	0.937345
cg16303562	MSR1	TSS200	0.0178068	0.977411	0.0730089	0.996974	0.281243	0.405512	0.117386	0.764368	0.0447991	0.97142	-0.0157122	0.957565	-0.0733659	0.646556	-0.0502911	0.828966
cg16328023	KIAA0895	Body	0.0262551	0.945931	-0.293731	0.335854	0.0467688	0.985675	-0.341603	0.0128984	-0.249298	0.634709	-0.06489	0.762588	-0.0807216	0.64165	0.00342454	0.992092
cg16386080	CDK20	Body	0.0985987	0.802793	-0.128402	0.996974	0.0255813	0.985675	0.0105676	0.993115	0.0500047	0.959638	-0.150404	0.333162	-0.115678	0.49017	-0.0509296	0.828966
cg16611352	P2RX1	1stExon	0.00703046	0.995938	0.0124604	0.997324	0.0286434	0.985675	-0.00204899	0.993115	0.0201741	0.998434	-0.235279	0.0611325	-0.245251	0.0573227	-0.232263	0.110925
cg16704703	NA	IGR	0.132103	0.675978	-0.136027	0.996974	-0.0924451	0.985675	0.0849216	0.922197	0.161144	0.959638	-0.151152	0.333162	-0.152314	0.373606	-0.228558	0.110925
cg17079034	KLHL30	TSS200	0.0190185	0.974919	-0.188053	0.835004	0.145824	0.985675	-0.0091317	0.993115	-0.00562166	0.999322	-0.127461	0.425576	-0.0812375	0.64165	-0.0748723	0.787311
cg17387577	NCOR2	Body	0.126118	0.675978	-0.0666127	0.996974	0.105858	0.985675	0.0508181	0.993115	0.131269	0.959638	-0.292232	0.0358785	-0.306601	0.0217697	-0.265908	0.0575693
cg17419815	C12orf71	1stExon	-0.0247112	0.946173	-0.0750944	0.996974	-0.0611702	0.985675	0.143235	0.739615	-0.0417964	0.976835	0.0412379	0.861081	0.0245112	0.931092	0.0154588	0.937345
cg17931641	NA	IGR	0.121981	0.675978	0.0915393	0.996974	0.0419603	0.985675	-0.054545	0.993115	-0.0296596	0.998434	-0.100491	0.56152	-0.138938	0.396451	-0.143144	0.454976
cg18547299	PODNL1	Body	-0.0988663	0.802793	-0.0261557	0.997324	-0.0113952	0.985675	-0.102169	0.811485	-0.0620543	0.959638	-0.0926282	0.62172	-0.0642238	0.702518	-0.0224079	0.915185
cg19147804	MAD1L1	Body	0.22945	0.29406	-0.184849	0.835004	0.109502	0.985675	-0.0131329	0.993115	0.120287	0.959638	-0.0406865	0.861081	-0.104469	0.513511	-0.00804542	0.979874
cg19186056	NA	IGR	-0.0833722	0.802793	0.0830285	0.996974	0.0481962	0.985675	-0.126853	0.739615	-0.0524881	0.959638	-0.0983106	0.573378	-0.141566	0.396451	-0.143986	0.454976
cg19279310	NA	IGR	-0.00668601	0.995938	-0.0451755	0.997324	-0.0212433	0.985675	-0.0533027	0.993115	0.0138719	0.998434	-0.243709	0.0561968	-0.299562	0.0217697	-0.197633	0.17514
cg19325793	HLA-DPB2	Body	0.0991154	0.802793	0.0174585	0.997324	0.0784742	0.985675	0.0698591	0.97707	0.00248991	0.999322	-0.0607459	0.787003	0.0312316	0.882514	0.00159941	0.992092
cg19463078	TNIP3	5'UTR	0.00664911	0.995938	0.00263305	0.997324	0.0841599	0.985675	0.047288	0.993115	0.0798288	0.959638	-0.116587	0.485246	-0.124233	0.456608	-0.144553	0.454976
cg19709355	RARA	Body	0.092823	0.802793	-0.0918306	0.996974	0.141558	0.985675	-0.298077	0.0475243	-0.18297	0.959638	0.119125	0.471494	0.135291	0.417816	0.0412719	0.851529
cg20316614	TMEM63A	5'UTR	0.0113822	0.995938	-0.0061166	0.997324	0.00590889	0.985675	-0.0834857	0.922197	-0.140196	0.959638	-0.140942	0.365259	-0.0662393	0.695965	-0.173275	0.281244
cg20867674	NA	IGR	-0.0328888	0.940961	-0.113448	0.996974	-0.0231651	0.985675	0.0196541	0.993115	0.199535	0.959638	-0.0448951	0.836428	-0.0324763	0.882514	0.0992924	0.678207
cg20951255	NA	IGR	0.00710735	0.995938	0.0661117	0.996974	-0.117628	0.985675	-0.00191024	0.993115	-0.0378647	0.990924	0.0556988	0.809919	0.0138212	0.942527	0.0319237	0.894058
cg20954219	ALK	Body	0.0755729	0.802793	0.000454376	0.997324	0.00461707	0.985675	-0.126695	0.739615	-0.055865	0.959638	-0.0136707	0.961092	0.00555622	0.964847	-0.0250811	0.915185
cg21494776	ICAM4	1stExon	0.108422	0.787196	0.0264878	0.997324	0.0456444	0.985675	-0.00816368	0.993115	7.74066e-05	0.999322	-0.0494939	0.818872	-0.0477261	0.805171	-0.00808089	0.979874
cg21766592	SLC1A5	1stExon	-0.151912	0.624921	-0.242794	0.835004	-0.0240981	0.985675	-0.0737893	0.962671	-0.0142847	0.998434	-0.1389	0.367018	-0.125549	0.456608	-0.0500557	0.828966
cg22225307	FCHO1	5'UTR	0.0870873	0.802793	-0.131851	0.996974	-0.00924212	0.985675	-0.0733731	0.962671	0.0208063	0.998434	0.0612006	0.787003	0.0756458	0.644774	0.0548088	0.828966
cg22250531	NA	IGR	0.0840796	0.802793	-0.123736	0.996974	-0.0358919	0.985675	-0.0555775	0.993115	-0.0286082	0.998434	-0.170025	0.251095	-0.115004	0.49017	-0.0813474	0.748552
cg22716190	PPT1	Body	0.0759881	0.802793	-0.163779	0.996974	0.227999	0.843149	0.175219	0.605137	0.0943974	0.959638	-0.0175891	0.957565	0.0131408	0.942527	-0.0134466	0.947428
cg22968401	PIPOX	5'UTR	0.144315	0.667144	0.0808498	0.996974	-0.0561783	0.985675	0.0224775	0.993115	0.0101467	0.999322	-0.131979	0.399766	-0.150698	0.375013	-0.0830403	0.741351
cg23042148	DNMT3A	Body	0.0898368	0.802793	-0.0911956	0.996974	-0.103705	0.985675	-0.205583	0.527405	-0.0845538	0.959638	-0.054841	0.809919	0.021122	0.931279	-0.0709319	0.800511
cg23143090	NA	IGR	0.167642	0.554959	0.165416	0.996974	0.0676851	0.985675	-0.0244394	0.993115	-0.119361	0.959638	-0.112991	0.489883	-0.0801121	0.64165	-0.221409	0.124663
cg23348723	C7orf16	TSS1500	0.050385	0.873792	-0.113314	0.996974	-0.0573027	0.985675	-0.00302669	0.993115	0.0323205	0.998434	0.00444726	0.961092	-0.0744204	0.644774	0.068536	0.800511
cg23889013	NA	IGR	0.0570649	0.8557	0.0273907	0.997324	-0.0384995	0.985675	-0.120045	0.764368	-0.149037	0.959638	0.0178793	0.957565	0.0657556	0.695965	0.0875515	0.704568
cg24461952	GALNT9	Body	0.0707414	0.808299	0.0334491	0.997324	0.234298	0.843149	-0.0170889	0.993115	0.138445	0.959638	-0.0725526	0.7053	-0.141256	0.396451	-0.0014543	0.992092
cg24465943	FCER1G	TSS200	0.0462639	0.88982	-0.0634321	0.997324	0.0904595	0.985675	-0.0494919	0.993115	-0.105209	0.959638	-0.13156	0.399766	-0.160995	0.330564	-0.0576626	0.828966
cg24693053	MFSD7	1stExon	0.181393	0.418472	0.0583232	0.997324	-0.112245	0.985675	-0.134139	0.739615	-0.119474	0.959638	-0.112952	0.489883	-0.0914309	0.574991	-0.0888575	0.704568
cg24710655	SPATC1	1stExon	0.0361088	0.937486	-0.0438531	0.997324	0.0443047	0.985675	-0.101585	0.811485	0.0253539	0.998434	-0.282712	0.0358785	-0.244735	0.0573227	-0.203818	0.154369
cg25124402	GPBAR1	5'UTR	-0.188057	0.391602	0.0282121	0.997324	0.0360514	0.985675	-0.113294	0.772034	-0.0346524	0.998434	-0.235011	0.0611325	-0.270091	0.0331148	-0.195818	0.175269
cg25153741	COL23A1	Body	0.0503696	0.873792	-0.0856091	0.996974	0.0323514	0.985675	0.0319029	0.993115	0.0871244	0.959638	-0.153071	0.332624	-0.130869	0.447226	-0.18685	0.214561
cg25353896	PARVG	TSS200	0.2872	0.136246	-0.0988734	0.996974	-0.0123122	0.985675	-0.00206512	0.993115	-0.0240122	0.998434	-0.164455	0.278842	-0.139589	0.396451	-0.118708	0.531984
cg25422678	BRE	Body	0.16274	0.583182	-0.190512	0.835004	0.10829	0.985675	-0.125682	0.739615	0.0254023	0.998434	-0.1408	0.365259	-0.17966	0.227998	-0.0536673	0.828966
cg26121730	MEF2D	5'UTR	0.113964	0.729299	0.00925645	0.997324	0.0413702	0.985675	-0.0196122	0.993115	0.0237929	0.998434	-0.0505356	0.818872	-0.105365	0.513511	-0.0884351	0.704568
cg26247309	PDGFRB	Body	-0.0298533	0.945931	-0.0711157	0.996974	0.105331	0.985675	-0.14422	0.739615	-0.0829186	0.959638	-0.081918	0.667701	-0.0232342	0.931279	-0.133496	0.483625
cg26338202	NA	IGR	0.0640769	0.8557	-0.101256	0.996974	0.0122165	0.985675	0.00989644	0.993115	0.163967	0.959638	-0.00541798	0.961092	-0.0182391	0.936006	0.12309	0.531984
cg26528311	FHL3	3'UTR	0.0789497	0.802793	0.00236509	0.997324	-0.0176469	0.985675	-0.000580815	0.994913	0.0745555	0.959638	-0.248992	0.0561968	-0.308204	0.0217697	-0.23589	0.110925
cg26679912	NA	IGR	0.0290629	0.945931	0.0119128	0.997324	0.0671748	0.985675	0.154093	0.739615	0.0581227	0.959638	-0.0751745	0.70301	-0.112311	0.495909	-0.0985346	0.678207
cg27115863	NA	IGR	0.065956	0.8499	-0.068238	0.996974	0.0736419	0.985675	-0.0299475	0.993115	0.177968	0.959638	-0.0189371	0.957565	-0.0359139	0.882514	-0.0684973	0.800511
cg27432242	GGCX	Body	0.0563544	0.8557	0.0894946	0.996974	-0.0351025	0.985675	-0.0284406	0.993115	-0.048692	0.959638	-0.287772	0.0358785	-0.293628	0.0217697	-0.27842	0.0425794

## Sheet: Neutrophils
			Age at visit		BMI		Alcohol units per week		Neutrophil count		Neutrophil percent		Neutrophil granularity		Neutrophil cellular content		Maximum temperature		Minimum temperature		Daylight
Probe ID	HGNC symbol	Feature	rho	p.BH	rho	p.BH	rho	p.BH	rho	p.BH	rho	p.BH	rho	p.BH	rho	p.BH	rho	p.BH	rho	p.BH	rho	p.BH
cg00026703	NR2F2	Body	0.0901228	0.755494	-0.0733002	0.999262	-0.0125594	0.993937	-0.0777848	0.814769	-0.0899779	0.876525	-0.170411	0.721248	-0.175811	0.36606	-0.0132708	0.967131	0.0402834	0.981579	-0.0759074	0.988107
cg00085434	NA	IGR	0.108154	0.711974	-0.107722	0.986968	-0.0454769	0.993937	-0.00977066	0.979759	0.0532747	0.89462	-0.161398	0.721248	-0.0653262	0.777365	0.0492907	0.967131	0.026359	0.981579	0.090573	0.988107
cg00289503	COL9A3	Body	0.0631389	0.843381	0.00990889	0.999262	-0.106041	0.993937	-0.132452	0.726967	-0.0996293	0.827837	-0.0571983	0.949355	-0.0665196	0.777365	0.0696437	0.967131	0.114362	0.8848	-0.0166068	0.997825
cg00319655	ANXA3	5'UTR	-0.104614	0.711974	-0.0322024	0.999262	0.0130219	0.993937	-0.079826	0.811275	0.109881	0.78644	0.07213	0.893688	-0.13511	0.461141	0.0231522	0.967131	0.0801411	0.981579	0.0553022	0.988107
cg00337466	ADAM8	TSS200	-0.0271654	0.914592	0.05583	0.999262	0.0861853	0.993937	-0.000538515	0.997232	-0.0500049	0.89462	-0.118454	0.843393	-0.133736	0.462647	0.0382581	0.967131	0.0616053	0.981579	-0.0565146	0.988107
cg00665106	NA	IGR	0.0392211	0.896931	-0.148948	0.895534	0.0123919	0.993937	-0.180274	0.371157	-0.179611	0.77505	-0.0142448	0.972381	-0.030186	0.89732	-0.166129	0.812099	-0.133411	0.853214	-0.129581	0.988107
cg00674628	NA	IGR	0.0148421	0.965711	-0.132631	0.967386	-0.0218095	0.993937	-0.0512073	0.902155	0.00326981	0.988031	-0.190184	0.721248	-0.196982	0.343169	0.118628	0.943166	0.12452	0.853214	0.150264	0.988107
cg00724111	PACSIN3	TSS1500	-0.0722114	0.797495	-0.018711	0.999262	0.0113074	0.993937	-0.0152719	0.97265	-0.0553901	0.89462	-0.000225749	0.998023	-0.0590852	0.79257	0.0222782	0.967131	-0.00311187	0.98789	-0.0198443	0.997825
cg00910127	AARS2	TSS1500	-0.19422	0.355679	0.0266276	0.999262	-0.0732033	0.993937	-0.24821	0.189174	-0.186215	0.77505	-0.210495	0.721248	-0.203958	0.343169	0.0400931	0.967131	-0.0240823	0.981579	0.0789612	0.988107
cg00929635	DBNDD2	5'UTR	-0.0455043	0.874288	0.111916	0.985684	-0.150753	0.993937	-0.0102415	0.979759	0.0123505	0.975456	-0.0818308	0.893688	-0.0011579	0.993666	0.0547345	0.967131	0.0196322	0.981579	-0.0407172	0.996409
cg00992253	NA	IGR	-0.171231	0.471997	0.058964	0.999262	0.0526059	0.993937	-0.0521811	0.900337	0.0111412	0.975456	-0.0434986	0.951543	0.109517	0.563475	0.0165216	0.967131	0.0327762	0.981579	0.0238622	0.997825
cg01055824	CCDC88C	Body	0.0205071	0.939688	-0.0750827	0.999262	-0.062175	0.993937	-0.0485018	0.90858	-0.0118797	0.975456	0.0545442	0.951543	0.212234	0.343169	-0.177416	0.812099	-0.199501	0.736302	-0.12881	0.988107
cg01195214	UBE2I	5'UTR	-0.227989	0.308672	-0.0219266	0.999262	0.18627	0.993937	0.0229756	0.942077	-0.0356003	0.941436	0.180422	0.721248	-0.0672872	0.777365	0.0469301	0.967131	-0.00360203	0.98789	-0.06209	0.988107
cg01269314	PINX1	Body	-0.110648	0.711974	0.0935024	0.999262	-0.112078	0.993937	-0.0247459	0.942077	0.00854214	0.981711	-0.128429	0.802819	-0.127827	0.490637	0.00535671	0.991082	0.0546173	0.981579	0.00441127	0.997825
cg01788910	CBS	3'UTR	-0.219245	0.323022	-0.0127051	0.999262	0.178343	0.993937	-0.0177388	0.955415	-0.032811	0.941436	0.0833659	0.893688	0.0546245	0.799702	-0.110756	0.952579	-0.0699155	0.981579	-0.146427	0.988107
cg01796438	ATG7	TSS1500	0.117245	0.711974	-0.040987	0.999262	-0.158169	0.993937	0.0205539	0.952607	0.0764923	0.89462	0.0196756	0.972381	-0.0177555	0.943005	0.0380517	0.967131	0.101299	0.8848	-0.0377699	0.996409
cg02097014	CHI3L1	TSS1500	-0.0108748	0.967384	-0.0120584	0.999262	-0.0492806	0.993937	-0.00662019	0.986483	-0.0118281	0.975456	-0.0537476	0.951543	-0.158874	0.415035	0.0833402	0.967131	0.0442885	0.981579	0.0860553	0.988107
cg02182476	LOC100128573	Body	0.115474	0.711974	-0.141655	0.944144	0.0332684	0.993937	-0.0201572	0.952607	0.0469189	0.89462	0.0331303	0.968083	0.218666	0.343169	-0.041583	0.967131	-0.12542	0.853214	-0.0255067	0.997825
cg02254056	TXNDC5	TSS1500	-0.230243	0.308672	-0.0816828	0.999262	-0.0701412	0.993937	-0.0308759	0.930105	0.00968368	0.979116	-0.0518674	0.951543	-0.0238611	0.906665	-0.0565341	0.967131	-0.0361977	0.981579	0.00474663	0.997825
cg02288859	KREMEN1	Body	0.15189	0.575004	-0.125233	0.985684	0.043611	0.993937	-0.131104	0.726967	0.0215376	0.960247	0.00425698	0.98926	-0.15104	0.427082	0.030244	0.967131	0.00507251	0.98789	0.0386567	0.996409
cg02675859	LOC283999	TSS200	0.000984142	0.992721	-0.0999219	0.999262	0.10896	0.993937	-0.0334686	0.930105	0.0106898	0.975456	-0.174639	0.721248	-0.198011	0.343169	0.130918	0.943166	0.133472	0.853214	0.125931	0.988107
cg02736016	WNK1	Body	-0.0379079	0.896931	-0.105549	0.989621	0.0672625	0.993937	-0.0220727	0.942077	-0.0240205	0.946099	-0.111691	0.878279	-0.0831624	0.662541	-0.151807	0.943166	-0.0622535	0.981579	-0.147829	0.988107
cg02797539	RAB37	Body	-0.149104	0.575004	-0.00581368	0.999262	0.00307805	0.993937	0.0581371	0.88961	0.11661	0.77505	-0.0625841	0.907009	-0.0975926	0.569899	0.138378	0.943166	0.168238	0.746051	0.155062	0.988107
cg02845204	KRTAP5-9	TSS200	0.112011	0.711974	-0.037888	0.999262	4.78453e-05	0.999639	-0.0882939	0.806368	-0.076028	0.89462	0.0123968	0.972381	-0.091658	0.601297	-0.0979462	0.965469	-0.0230859	0.981579	-0.0990441	0.988107
cg03012280	ZFYVE19	TSS1500	0.111303	0.711974	0.0703292	0.999262	0.0959697	0.993937	-0.0460995	0.90858	-0.02819	0.941436	-0.0338107	0.968083	-0.0349854	0.873965	-0.0753067	0.967131	-0.0375843	0.981579	-0.120775	0.988107
cg03209720	C6orf35	Body	0.0477094	0.874288	-0.00380394	0.999262	-0.0788969	0.993937	-0.210089	0.233536	-0.104621	0.78644	-0.0744939	0.893688	-0.121338	0.519969	-0.0243616	0.967131	0.0300481	0.981579	-0.0485143	0.988107
cg03211593	NA	IGR	0.315279	0.0462864	-0.0717565	0.999262	-0.0863209	0.993937	-0.0151042	0.97265	0.063397	0.89462	-0.103951	0.883477	-0.0837688	0.660754	0.118989	0.943166	0.165026	0.746051	0.0012963	0.997825
cg03247944	NA	IGR	-0.175737	0.458142	-0.0365889	0.999262	-0.0344167	0.993937	0.0719256	0.814769	0.0762118	0.89462	-0.0438437	0.951543	-0.0408619	0.844527	0.0331077	0.967131	0.0180101	0.981579	0.0311111	0.997825
cg03310874	RADIL	Body	0.0942347	0.733407	0.0258587	0.999262	0.0490255	0.993937	-0.104127	0.801822	-0.131025	0.77505	0.0735296	0.893688	-0.0154914	0.955394	-0.00829145	0.980047	-0.0295418	0.981579	-0.0557278	0.988107
cg03401379	NA	IGR	0.141836	0.575221	-0.207953	0.895534	-0.0152308	0.993937	0.128173	0.726967	0.167363	0.77505	-0.0655414	0.905004	0.0344725	0.873965	-0.0430794	0.967131	-0.104752	0.8848	-0.0138336	0.997825
cg03566001	PVT1	Body	-0.16628	0.484525	-0.000203887	0.999262	0.015159	0.993937	-0.175627	0.387857	-0.168302	0.77505	-0.0633193	0.907009	-0.145963	0.427082	0.115909	0.943166	0.104652	0.8848	0.0498429	0.988107
cg03593358	MFN2	TSS1500	0.0803244	0.791593	-0.154808	0.895534	-0.170297	0.993937	-0.00381798	0.993678	0.0372997	0.941436	-0.0928183	0.893688	-0.0151559	0.955394	0.0803022	0.967131	0.10194	0.8848	0.0766846	0.988107
cg03622371	P2RY6	5'UTR	-0.208211	0.323022	0.161467	0.895534	-0.190727	0.993937	0.013221	0.978432	0.0282868	0.941436	-0.102883	0.883477	-0.221688	0.343169	-8.06247e-05	0.999294	0.0355527	0.981579	-0.0024894	0.997825
cg03699958	GTF2IRD1	5'UTR	-0.0376158	0.896931	0.0364724	0.999262	-0.0294886	0.993937	-0.0485276	0.90858	-0.125443	0.77505	-0.093273	0.893688	-0.0978732	0.569899	0.233618	0.812099	0.166096	0.746051	0.15434	0.988107
cg03962678	TTC36	TSS200	0.314476	0.0462864	0.0305131	0.999262	0.0397913	0.993937	-0.0668146	0.833018	-0.0238625	0.946099	0.0439985	0.951543	-0.104156	0.569899	0.0806699	0.967131	0.112011	0.8848	-0.0381923	0.996409
cg04099543	P2RY6	5'UTR	0.0318062	0.896931	0.0300878	0.999262	-0.0144573	0.993937	-0.123565	0.742528	0.00172842	0.98865	-0.147759	0.726367	-0.171982	0.3755	0.135327	0.943166	0.153504	0.799586	0.0746853	0.988107
cg04153152	MYO3B	Body	0.0497084	0.874288	-0.027583	0.999262	0.00497591	0.993937	-0.2416	0.189174	-0.155916	0.77505	0.0202432	0.972381	-0.0264059	0.906088	0.0128322	0.967131	-0.0336017	0.981579	-0.000470794	0.997825
cg04246138	MYLK3	Body	0.0344296	0.896931	-0.0899082	0.999262	-0.097732	0.993937	-0.0451933	0.90858	-0.0557803	0.89462	-0.145415	0.726367	-0.158419	0.415035	-0.00557601	0.991082	0.0180101	0.981579	-0.017371	0.997825
cg04299439	NA	IGR	0.0252894	0.920606	-0.163721	0.895534	0.0960973	0.993937	-0.0440002	0.910908	0.140837	0.77505	-0.153725	0.726367	-0.0977119	0.569899	-0.0530866	0.967131	-0.0212962	0.981579	-0.0704578	0.988107
cg04384209	KDM4B	5'UTR	0.104039	0.711974	-0.115406	0.985684	-0.0626933	0.993937	-0.0237463	0.942077	-0.0270485	0.943646	-0.0696435	0.893688	-0.12078	0.519969	-0.0628776	0.967131	-0.0194645	0.981579	-0.0160715	0.997825
cg04444949	AGTRAP	TSS1500	-0.110901	0.711974	-0.0927044	0.999262	0.172243	0.993937	-0.132365	0.726967	-0.161162	0.77505	0.0334786	0.968083	-0.206006	0.343169	0.000396674	0.999294	-0.00604638	0.98789	0.00864842	0.997825
cg04459545	USHBP1	TSS200	0.211154	0.323022	-0.00160197	0.999262	-0.00675416	0.993937	-0.0713613	0.814769	-0.0509723	0.89462	0.0401349	0.968083	-0.122805	0.519969	-0.0738877	0.967131	-0.0546851	0.981579	-0.106048	0.988107
cg04514683	ABP1	TSS1500	0.0818529	0.791593	-0.0632282	0.999262	0.107803	0.993937	-0.233493	0.19613	-0.160208	0.77505	-0.134156	0.772127	-0.12754	0.490637	-0.100655	0.958756	-0.0151208	0.981579	-0.0925755	0.988107
cg04540406	SHCBP1	TSS1500	-0.0750777	0.797495	-0.0478959	0.999262	0.0305971	0.993937	-0.106084	0.801822	-0.0576667	0.89462	-0.0183856	0.972381	-0.0443098	0.834284	-0.0421119	0.967131	0.00925821	0.98789	-0.0516422	0.988107
cg04569651	COL23A1	Body	-0.0135443	0.965954	-0.0875256	0.999262	0.0412347	0.993937	-0.182283	0.371157	-0.143927	0.77505	-0.0959304	0.893688	0.153082	0.427082	-0.116142	0.943166	-0.200385	0.736302	-0.0427713	0.996409
cg04758026	NA	IGR	-0.0793403	0.791593	0.00760789	0.999262	-0.0292335	0.993937	-0.131411	0.726967	-0.102454	0.806217	0.204899	0.721248	0.0445904	0.834284	-0.186501	0.812099	-0.184229	0.736302	-0.292847	0.264256
cg04764056	CLC	TSS200	0.148938	0.575004	-0.173525	0.895534	0.0192019	0.993937	-0.211994	0.230864	-0.10514	0.78644	-0.134811	0.772127	-0.00614751	0.976116	-0.0163797	0.967131	-0.0424472	0.981579	0.0427326	0.996409
cg04899715	NA	IGR	0.0723252	0.797495	0.0816945	0.999262	0.0946061	0.993937	-0.241277	0.189174	-0.155229	0.77505	-0.0954531	0.893688	-0.0256899	0.906088	-0.040164	0.967131	-0.0149176	0.981579	-0.0557633	0.988107
cg04952627	PRKAR1B	Body	0.106859	0.711974	-0.00414181	0.999262	0.0526139	0.993937	0.187365	0.353941	0.0315405	0.941436	0.0568307	0.949355	0.0138593	0.959991	0.0409187	0.967131	0.0472166	0.981579	-0.00419522	0.997825
cg05060607	C3AR1	Body	-0.101542	0.71359	-0.155193	0.895534	0.0988882	0.993937	-0.148895	0.608503	-0.111761	0.78644	-0.0436018	0.951543	0.018249	0.942303	-0.100462	0.958756	-0.077442	0.981579	0.0994246	0.988107
cg05171937	STK38L	TSS1500	0.145142	0.575004	-0.0984132	0.999262	-0.0898056	0.993937	0.204258	0.266016	0.0706396	0.89462	-0.00728202	0.979071	-0.0259995	0.906088	0.0456788	0.967131	0.0395997	0.981579	0.0683038	0.988107
cg05504085	RASAL3	TSS1500	0.0235856	0.929335	0.0361753	0.999262	-0.059376	0.993937	-0.0616164	0.878917	-0.0503209	0.89462	-0.0372808	0.968083	-0.174162	0.371112	0.0473396	0.967131	0.11225	0.8848	0.0502524	0.988107
cg05515099	NA	IGR	-0.0448707	0.874288	-0.214262	0.895534	0.0342174	0.993937	-0.0913767	0.801822	0.0333592	0.941436	0.0818598	0.893688	-0.0689709	0.77512	-0.0609394	0.967131	-0.0399867	0.981579	-0.0538962	0.988107
cg05670991	SIGLEC9	TSS200	0.0480015	0.874288	-0.014476	0.999262	0.0627172	0.993937	-0.0809836	0.811275	-0.132356	0.77505	-0.0469687	0.951543	-0.145308	0.427082	-0.0170021	0.967131	-0.0499737	0.981579	-0.0419168	0.996409
cg05765605	NA	IGR	0.0742289	0.797495	-0.201656	0.895534	0.21709	0.993937	-0.1783	0.372193	-0.159547	0.77505	-0.0865554	0.893688	0.0429262	0.840121	0.0436373	0.967131	0.0428922	0.981579	0.00607518	0.997825
cg05785753	NADSYN1	Body	0.176297	0.458142	0.0318296	0.999262	0.0687617	0.993937	-0.0339329	0.930105	0.00364065	0.988031	0.0751325	0.893688	-0.105272	0.569899	0.00925895	0.979061	-0.0256044	0.981579	0.0743467	0.988107
cg05892806	ATP4B	Body	0.0474387	0.874288	-0.130027	0.978624	-0.108178	0.993937	-0.00289573	0.993678	-0.0639742	0.89462	0.0226104	0.969012	-0.0480351	0.83303	0.0452918	0.967131	0.0195	0.981579	0.0427229	0.996409
cg06097213	LOC285830	TSS1500	0.0390581	0.896931	-0.00384472	0.999262	0.143632	0.993937	0.00325044	0.993678	0.093912	0.876525	0.014377	0.972381	-0.19434	0.343169	0.128106	0.943166	0.161646	0.759665	0.014256	0.997825
cg06161550	GALNT9	Body	-0.10324	0.71359	-0.00983316	0.999262	0.10136	0.993937	-0.0686042	0.822903	-0.118684	0.77505	-0.0127645	0.972381	0.0338791	0.873965	0.0217397	0.967131	0.0249433	0.981579	0.0919273	0.988107
cg06192961	C6orf10	Body	0.0384584	0.896931	-0.122221	0.985684	0.0320244	0.993937	0.0760177	0.814769	-0.0476606	0.89462	0.00107392	0.998023	0.00997923	0.968425	-0.132554	0.943166	-0.0282842	0.981579	-0.0351354	0.997825
cg06246882	C16orf38	TSS1500	0.134569	0.632264	-0.148668	0.895534	0.0706834	0.993937	-0.121308	0.751357	-0.0796332	0.89462	0.0299472	0.968083	-0.108291	0.563475	-0.017502	0.967131	-0.0928433	0.942903	0.0192477	0.997825
cg06515418	COL23A1	Body	0.0835198	0.791593	-0.116979	0.985684	0.00214506	0.993937	-0.229178	0.19613	-0.135178	0.77505	-0.145814	0.726367	-0.132594	0.463177	-0.024268	0.967131	-0.0489869	0.981579	-0.0241943	0.997825
cg06795216	LOC121838	TSS200	-0.0279004	0.914592	0.0927451	0.999262	-0.0728524	0.993937	-0.0803516	0.811275	-0.0298314	0.941436	-0.0759677	0.893688	-0.157303	0.415035	-0.101442	0.958756	-0.0146113	0.981579	-0.140193	0.988107
cg06835772	NA	IGR	0.019606	0.940632	0.0226431	0.999262	0.0971658	0.993937	-0.141968	0.665334	-0.142759	0.77505	-0.146447	0.726367	-0.111175	0.558798	0.0807247	0.967131	-0.0505477	0.981579	0.0531513	0.988107
cg06915112	NA	IGR	0.0394241	0.896931	0.0521484	0.999262	0.0523268	0.993937	-0.306515	0.0491171	-0.0696754	0.89462	-0.184927	0.721248	-0.181352	0.343169	0.0800313	0.967131	0.128016	0.853214	0.154617	0.988107
cg07033722	PPT1	3'UTR	-0.061229	0.843381	-0.0365773	0.999262	-0.068028	0.993937	0.195697	0.322343	0.130293	0.77505	0.0489843	0.951543	-0.116935	0.529235	0.164452	0.812099	0.181453	0.736302	-0.00115441	0.997825
cg07285237	NA	IGR	0.0391627	0.896931	-0.0125769	0.999262	0.141518	0.993937	0.0222984	0.942077	0.0654414	0.89462	-0.221589	0.721248	-0.04998	0.828062	0.133724	0.943166	0.180185	0.736302	0.0705643	0.988107
cg07740599	RAB11FIP3	1stExon	-0.0333101	0.896931	-0.0670321	0.999262	-0.0759783	0.993937	0.0998381	0.801822	0.105443	0.78644	0.115438	0.862045	-0.055376	0.799702	0.0238746	0.967131	0.0732918	0.981579	-0.0364027	0.996409
cg07932199	ATXN2	Body	0.187787	0.408328	-0.123287	0.985684	0.0499345	0.993937	-0.00545932	0.986483	0.0527007	0.89462	-0.129889	0.794327	-0.0578305	0.797764	0.115122	0.943166	0.130221	0.853214	0.139003	0.988107
cg07989851	NA	IGR	-0.0195229	0.940632	-0.0499581	0.999262	-0.00149118	0.993937	0.0351647	0.930105	0.0171036	0.969215	-0.047991	0.951543	-0.144041	0.429699	-0.126568	0.943166	-0.129373	0.853214	-0.165042	0.988107
cg08077617	CES1	TSS1500	0.00858049	0.967384	-0.0713021	0.999262	-0.209826	0.993937	0.102215	0.801822	0.109065	0.78644	-0.00959755	0.972381	-0.104869	0.569899	0.124568	0.943166	0.174471	0.736302	0.0288829	0.997825
cg08231648	NA	IGR	0.046144	0.874288	-0.0476221	0.999262	-0.0665687	0.993937	0.0261035	0.942077	0.078698	0.89462	-0.0813728	0.893688	-0.16337	0.411765	0.163523	0.812099	0.138502	0.853214	0.0657435	0.988107
cg08257257	MTL5	Body	0.173781	0.458142	-0.0385288	0.999262	0.0375665	0.993937	0.0778267	0.814769	0.121918	0.77505	-0.179106	0.721248	-0.0596238	0.791353	-0.0561245	0.967131	-0.0269685	0.981579	0.00820987	0.997825
cg08259506	NA	IGR	0.0940471	0.733407	0.0456298	0.999262	0.131598	0.993937	-0.00982226	0.979759	-0.106127	0.78644	-0.0219589	0.969165	-0.0301215	0.89732	-0.119554	0.943166	-0.1345	0.853214	-0.138536	0.988107
cg08320524	KCNJ15	5'UTR	0.00915252	0.967384	0.0502959	0.999262	0.0966634	0.993937	-0.0835182	0.80859	-0.172152	0.77505	0.0243615	0.969012	0.04988	0.828062	0.0450821	0.967131	0.0634112	0.981579	0.0476243	0.988107
cg08400424	ARHGAP26	Body	-0.0096938	0.967384	-0.148831	0.895534	0.129605	0.993937	-0.41356	0.000519489	-0.184957	0.77505	0.00710787	0.979071	-0.1837	0.343169	-0.0557375	0.967131	0.00576905	0.98789	-0.0746015	0.988107
cg08423562	FHL3	5'UTR	-0.0475125	0.874288	-0.0662981	0.999262	-0.0606359	0.993937	0.00555928	0.986483	0.0277192	0.941436	-0.0786864	0.893688	-0.159742	0.415035	0.000309599	0.999294	0.032415	0.981579	-0.0448222	0.996409
cg08438529	NA	IGR	0.145994	0.575004	-0.268589	0.862872	0.0670073	0.993937	-0.0241655	0.942077	0.0919062	0.876525	-0.0794056	0.893688	0.0469353	0.83303	-0.0840432	0.967131	-0.0501124	0.981579	-0.0583849	0.988107
cg08515285	DGCR6L	Body	0.0899629	0.755494	-0.0108992	0.999262	0.12624	0.993937	-0.101447	0.801822	0.0288962	0.941436	-0.092083	0.893688	-0.114068	0.53485	-0.0930313	0.967131	-0.0523278	0.981579	-0.144556	0.988107
cg08618878	CDH15	Body	0.211428	0.323022	-0.180661	0.895534	0.10703	0.993937	-0.114736	0.792009	-0.030328	0.941436	-0.023365	0.969012	-0.134571	0.461141	0.0956758	0.967131	0.125923	0.853214	0.064315	0.988107
cg08642068	SPAG4L	Body	-0.00869428	0.967384	-9.32053e-05	0.999262	0.071744	0.993937	-0.0188706	0.953031	-0.0355326	0.941436	-0.0804376	0.893688	-0.146695	0.427082	0.171221	0.812099	0.125939	0.853214	0.114164	0.988107
cg09022584	TMEM51	Body	-0.0599127	0.843381	-0.0744419	0.999262	-0.0524145	0.993937	-0.0466799	0.90858	0.0495696	0.89462	-0.100565	0.883477	-0.0341371	0.873965	0.02183	0.967131	0.00660426	0.98789	0.0780647	0.988107
cg09046445	JPH3	Body	0.00469313	0.981128	0.00726419	0.999262	-0.0283244	0.993937	0.0243912	0.942077	0.0661895	0.89462	0.0804408	0.893688	-0.169366	0.379722	0.115487	0.943166	0.0868486	0.981579	0.0175484	0.997825
cg09101151	NA	IGR	0.00862354	0.967384	-0.0424842	0.999262	0.0651334	0.993937	0.0883713	0.806368	0.0777725	0.89462	0.0332528	0.968083	-0.0896002	0.617928	0.0467624	0.967131	0.0344627	0.981579	0.00921595	0.997825
cg09152813	NCK2	5'UTR	-0.000824219	0.992721	-0.0152041	0.999262	0.0534512	0.993937	-0.100093	0.801822	-0.144842	0.77505	0.118828	0.843393	0.158142	0.415035	-0.071914	0.967131	-0.0983447	0.888578	-0.0540639	0.988107
cg09288273	NIPAL4	TSS1500	0.135141	0.632264	-0.0484493	0.999262	0.0239705	0.993937	0.0482503	0.90858	0.199597	0.77505	0.028583	0.968083	-0.0793113	0.680392	0.0236327	0.967131	0.0566908	0.981579	0.00628478	0.997825
cg09298313	NA	IGR	0.201595	0.350425	-0.0570475	0.999262	-0.0105977	0.993937	-0.0988449	0.801822	-0.0419465	0.927535	-0.0796507	0.893688	-0.204029	0.343169	-0.0102942	0.97367	0.0201901	0.981579	-0.049256	0.988107
cg09338148	NA	IGR	-0.0613059	0.843381	-0.110757	0.985684	0.040206	0.993937	-0.134742	0.726967	0.014166	0.975456	-0.168515	0.721248	-0.14804	0.427082	-0.0191048	0.967131	0.0451624	0.981579	0.00495946	0.997825
cg09374353	EHD1	3'UTR	0.100056	0.71359	0.0941141	0.999262	0.132874	0.993937	-0.179532	0.371157	-0.0481443	0.89462	0.0189436	0.972381	-0.140557	0.432565	-0.0542895	0.967131	0.0275908	0.981579	-0.112707	0.988107
cg09492074	MEGF11	Body	0.164807	0.484525	-0.163855	0.895534	-0.0463621	0.993937	-0.217921	0.212405	-0.150444	0.77505	-0.194773	0.721248	-0.140964	0.432565	0.0721656	0.967131	0.0487032	0.981579	0.111585	0.988107
cg09806625	EXOC2	Body	-0.147929	0.575004	-0.0506454	0.999262	-0.0193215	0.993937	-0.0648153	0.85149	-0.112106	0.78644	-0.112155	0.878279	-0.066368	0.777365	-0.0666509	0.967131	-0.0553558	0.981579	-0.0830338	0.988107
cg10131232	SIRPG	3'UTR	0.126262	0.698559	-0.187156	0.895534	-0.152706	0.993937	-0.0596946	0.882257	0.0566671	0.89462	-0.0375485	0.968083	-0.0626589	0.780465	-0.0341623	0.967131	-0.0866583	0.981579	0.0402013	0.996409
cg10442729	NA	IGR	-0.00873426	0.967384	-0.146379	0.895534	-0.0101273	0.993937	0.0361611	0.930105	0.152682	0.77505	0.0359618	0.968083	-0.150517	0.427082	0.0146318	0.967131	0.100689	0.8848	0.00552377	0.997825
cg10621012	ARAP3	TSS1500	-0.0160261	0.965711	-0.0918247	0.999262	-0.17383	0.993937	0.0388988	0.930105	0.135729	0.77505	0.00129644	0.998023	-0.0798209	0.680392	-0.0865233	0.967131	-0.0148306	0.981579	-0.0683909	0.988107
cg10688516	NFIC	Body	-0.107561	0.711974	-0.0273266	0.999262	-0.17765	0.993937	0.0391762	0.930105	0.0514463	0.89462	-0.0527801	0.951543	-0.00308021	0.988171	-0.0281284	0.967131	-0.0304222	0.981579	0.00922562	0.997825
cg10702770	NA	IGR	0.0321599	0.896931	-0.0284393	0.999262	-0.165776	0.993937	0.0642058	0.853092	0.027816	0.941436	-0.24913	0.721248	-0.118174	0.529235	0.0704596	0.967131	0.0596608	0.981579	0.0646052	0.988107
cg10824677	NA	IGR	0.102498	0.71359	-0.15348	0.895534	-0.107357	0.993937	-0.0117764	0.979759	-0.0141853	0.975456	-0.0135256	0.972381	-0.0117274	0.96405	0.0683246	0.967131	0.0262816	0.981579	0.0224562	0.997825
cg10875794	COMMD10	Body	-0.0582182	0.848187	-0.181238	0.895534	-0.0083809	0.993937	-0.296428	0.0568434	-0.15046	0.77505	-0.0655123	0.905004	-0.0548051	0.799702	-0.084627	0.967131	-0.040809	0.981579	-0.0198733	0.997825
cg10876767	SORCS2	Body	-0.0271316	0.914592	-0.0276004	0.999262	-0.0307805	0.993937	-0.0307276	0.930105	-0.0568573	0.89462	-0.0369809	0.968083	-0.148443	0.427082	0.0307664	0.967131	0.0699348	0.981579	-0.0758817	0.988107
cg10884953	GNG7	5'UTR	-0.0654577	0.84292	0.081945	0.999262	0.00214506	0.993937	-0.192037	0.322343	-0.18281	0.77505	-0.0655156	0.905004	-0.182903	0.343169	0.0301569	0.967131	0.0141824	0.981579	-0.0775359	0.988107
cg10953410	HTR3A	Body	0.0830524	0.791593	0.0571931	0.999262	0.0212593	0.993937	-0.0352357	0.930105	-0.0575958	0.89462	-0.0458012	0.951543	0.116158	0.529235	0.0992329	0.958756	0.067039	0.981579	0.212231	0.988107
cg11155735	CSGALNACT1	TSS1500	0.179837	0.458142	-0.0134565	0.999262	-0.0501897	0.993937	-0.0245395	0.942077	0.0619233	0.89462	-0.0170795	0.972381	-0.245056	0.343169	-0.0358329	0.967131	0.0531791	0.981579	-0.00182513	0.997825
cg11334709	C1orf200	TSS1500	0.106712	0.711974	-0.0216411	0.999262	0.0390178	0.993937	-0.0727544	0.814769	-0.0620265	0.89462	-0.150878	0.726367	-0.231632	0.343169	-0.0687794	0.967131	0.0251013	0.981579	-0.112433	0.988107
cg11347165	NA	IGR	0.104439	0.711974	-0.00643117	0.999262	0.133871	0.993937	-0.0314048	0.930105	-0.0535198	0.89462	-0.109543	0.883477	0.0071764	0.976116	0.0548345	0.967131	0.0285776	0.981579	0.0633701	0.988107
cg11381282	GJB2	Body	0.134997	0.632264	-0.201411	0.895534	0.127875	0.993937	-0.0923924	0.801822	-0.00415982	0.988031	-0.141499	0.772127	-0.166567	0.388962	-0.0256677	0.967131	-0.0285292	0.981579	-0.0927367	0.988107
cg11792874	NA	IGR	0.115178	0.711974	-0.0274664	0.999262	-0.102867	0.993937	-0.0942047	0.801822	-0.0792978	0.89462	-0.146708	0.726367	-0.157097	0.415035	-0.0126774	0.967131	0.0440338	0.981579	-0.0548668	0.988107
cg11808531	POLE	Body	0.0506987	0.874288	0.0785371	0.999262	-0.0251108	0.993937	-0.115245	0.792009	-0.191123	0.77505	0.0860845	0.893688	0.0412103	0.844527	0.0319629	0.967131	-0.0182423	0.981579	-0.00612354	0.997825
cg11882377	VPS28	TSS1500	0.00803921	0.967384	-0.146892	0.895534	-0.0849653	0.993937	-0.0015446	0.997232	0.0432944	0.927535	0.00318951	0.993479	0.0959154	0.571601	-0.163046	0.812099	-0.122908	0.864895	-0.121136	0.988107
cg11951169	ASH1L	Body	-0.071787	0.797495	-0.131763	0.967386	-0.0153982	0.993937	-0.0938564	0.801822	0.0579731	0.89462	-0.106392	0.883477	-0.0267639	0.906088	-0.0288572	0.967131	-0.00237663	0.990572	-0.00515938	0.997825
cg12031275	NA	IGR	0.0736015	0.797495	-0.00108351	0.999262	-0.122484	0.993937	-0.0594269	0.882257	-0.115101	0.77505	-0.104038	0.883477	0.0988408	0.569899	0.0128097	0.967131	-0.0305318	0.981579	-0.0357287	0.996409
cg12062782	RIN1	Body	0.231356	0.308672	-0.076574	0.999262	0.0848297	0.993937	0.0730123	0.814769	0.126723	0.77505	0.0382354	0.968083	-0.0841235	0.660754	0.0613296	0.967131	0.0976127	0.889229	0.0683038	0.988107
cg12081643	COL4A1	3'UTR	-0.117676	0.711974	-0.0231615	0.999262	-0.0298874	0.993937	0.0823735	0.811275	0.176099	0.77505	-0.00286701	0.993479	0.1165	0.529235	-0.11449	0.943166	-0.182897	0.736302	-0.0964998	0.988107
cg12182649	MICA	Body	-0.10463	0.711974	-0.00118254	0.999262	0.0435073	0.993937	0.0375316	0.930105	0.0320177	0.941436	0.106076	0.883477	0.0294958	0.89732	-0.198569	0.812099	-0.200488	0.736302	-0.159683	0.988107
cg12209693	GTF2IRD1	5'UTR	0.0348602	0.896931	-0.095786	0.999262	-0.0595435	0.993937	0.0423105	0.910908	0.00266358	0.988031	-0.103612	0.883477	0.0434132	0.839328	0.0203497	0.967131	0.0279359	0.981579	0.110685	0.988107
cg12213414	LYG2	Body	0.0807335	0.791593	0.0389132	0.999262	0.27165	0.766339	-0.0188351	0.953031	-0.0523525	0.89462	0.164697	0.721248	0.124205	0.513241	0.0420281	0.967131	0.0353818	0.981579	0.0390856	0.996409
cg12244647	PLXNB2	5'UTR	-0.0372067	0.896931	0.0444648	0.999262	0.0508755	0.993937	-0.00934824	0.979759	0.020267	0.960883	-0.0142254	0.972381	-0.184061	0.343169	0.0421184	0.967131	0.0492449	0.981579	0.100408	0.988107
cg12445565	NA	IGR	0.0545614	0.863465	-0.174055	0.895534	0.139397	0.993937	-0.271412	0.124904	-0.172088	0.77505	-0.149449	0.726367	-0.0395073	0.845889	0.133705	0.943166	0.0728048	0.981579	0.100656	0.988107
cg12481212	NA	IGR	0.154363	0.558863	0.00309325	0.999262	-0.0234681	0.993937	0.0934082	0.801822	0.0604206	0.89462	0.00949435	0.972381	-0.0664261	0.777365	0.0691115	0.967131	0.121963	0.865162	0.120333	0.988107
cg12547959	TRIO	Body	0.0927984	0.739899	0.0312471	0.999262	0.0722145	0.993937	0.0559733	0.88961	0.0616621	0.89462	0.0679956	0.894717	0.202542	0.343169	-0.096769	0.967131	-0.0992315	0.888578	-0.0447867	0.996409
cg12587921	RAB35	Body	-0.0825511	0.791593	-0.0422162	0.999262	0.121112	0.993937	-0.16692	0.42749	-0.0116378	0.975456	0.0154638	0.972381	-0.0416618	0.844527	0.0223943	0.967131	0.0665231	0.981579	-0.0569177	0.988107
cg12617549	NA	IGR	0.0019037	0.990782	0.0491949	0.999262	0.0183247	0.993937	-0.104307	0.801822	-0.0412757	0.927535	0.0463398	0.951543	-0.053902	0.802707	-0.0425634	0.967131	-0.056636	0.981579	-0.0611968	0.988107
cg12636435	NA	IGR	-0.118017	0.711974	-0.0556844	0.999262	0.0170728	0.993937	0.0312371	0.930105	0.116578	0.77505	-0.186091	0.721248	-0.196698	0.343169	0.134769	0.943166	0.195661	0.736302	0.0881416	0.988107
cg12682382	UBE2W	Body	-0.0401069	0.896931	0.0357908	0.999262	0.0161239	0.993937	0.0723481	0.814769	0.091874	0.876525	0.0281831	0.968083	0.0598625	0.791353	0.0368649	0.967131	0.0303964	0.981579	-0.00239266	0.997825
cg12711832	NA	IGR	-0.0151435	0.965711	0.115231	0.985684	0.074535	0.993937	0.0518232	0.900337	-0.118839	0.77505	0.101435	0.883477	0.0872747	0.637594	-0.0851881	0.967131	-0.108522	0.8848	-0.0499493	0.988107
cg12744634	CCDC21	TSS1500	-0.122335	0.711974	-0.0753565	0.999262	-0.0258285	0.993937	-0.0845308	0.807237	-0.0682598	0.89462	-0.199778	0.721248	-0.116274	0.529235	-0.114123	0.943166	0.00961294	0.98789	-0.0473664	0.988107
cg12746557	KCNJ15	5'UTR	-0.0281772	0.914592	0.0377016	0.999262	0.154389	0.993937	-0.128731	0.726967	-0.160734	0.77505	0.0205141	0.972381	-0.00766343	0.976116	0.104283	0.958756	0.147657	0.853214	0.0774037	0.988107
cg12894711	BLVRA	Body	-0.0921249	0.741599	-0.12701	0.985684	0.0500701	0.993937	-0.124478	0.742528	-0.100922	0.818926	-0.12998	0.794327	0.0253093	0.906088	-0.176065	0.812099	-0.187905	0.736302	-0.0877321	0.988107
cg13001844	LPCAT1	Body	-0.0729711	0.797495	-0.051461	0.999262	0.00389142	0.993937	-0.2222	0.19613	-0.14838	0.77505	-0.105857	0.883477	-0.181848	0.343169	-0.087752	0.967131	-0.0552397	0.981579	-0.115532	0.988107
cg13209762	NA	IGR	0.0225615	0.93539	-0.185013	0.895534	-0.0471515	0.993937	-0.0669952	0.833018	-0.120377	0.77505	0.0293119	0.968083	-0.0104147	0.96834	0.0417797	0.967131	0.0653009	0.981579	0.0187608	0.997825
cg13227806	NA	IGR	0.17495	0.458142	-0.0209129	0.999262	0.00340499	0.993937	-0.0428426	0.910908	-0.0517978	0.89462	-0.0750357	0.893688	-0.0044155	0.980117	0.0536413	0.967131	0.0618536	0.981579	0.0160038	0.997825
cg13320211	PPAP2B	Body	-0.0288569	0.914592	-0.00858654	0.999262	0.208597	0.993937	-0.345053	0.0121203	-0.311255	0.119535	0.0433051	0.951543	-0.132004	0.463282	-0.000967497	0.999294	0.0839979	0.981579	0.0268481	0.997825
cg13443575	SLFN13	TSS200	-0.044963	0.874288	0.00273208	0.999262	-0.144804	0.993937	0.0983451	0.801822	0.0866565	0.888876	0.0395996	0.968083	-0.0577563	0.797764	-0.106789	0.958756	-0.0634563	0.981579	-0.094162	0.988107
cg13473383	ZDHHC5	TSS1500	-0.21032	0.323022	0.0747915	0.999262	-0.0590889	0.993937	-0.0454868	0.90858	-0.0423883	0.927535	-0.0226426	0.969012	-0.18806	0.343169	-0.0687632	0.967131	-0.0142211	0.981579	-0.0273222	0.997825
cg13534536	AFAP1	5'UTR	0.0980113	0.71359	0.150282	0.895534	-0.027822	0.993937	0.00307953	0.993678	0.070617	0.89462	0.0993037	0.883477	-0.0235418	0.906665	-0.117264	0.943166	-0.133024	0.853214	-0.136633	0.988107
cg13595143	NA	IGR	0.143082	0.575004	0.0583524	0.999262	0.0495677	0.993937	-0.0914057	0.801822	-0.123198	0.77505	-0.00248324	0.993479	-0.102266	0.569899	0.035175	0.967131	0.0350045	0.981579	-0.0158522	0.997825
cg13692972	OTUB1	TSS1500	0.160329	0.512242	-0.346823	0.0993708	-0.0720949	0.993937	0.0702327	0.814769	0.0503661	0.89462	-0.0264674	0.968083	-0.0123982	0.96405	-0.0416959	0.967131	0.00860682	0.98789	0.0253971	0.997825
cg13736939	PTPRN2	Body	-0.0470143	0.874288	-0.017808	0.999262	0.0468246	0.993937	-0.0686816	0.822903	-0.088114	0.876525	-0.123278	0.827232	0.0939157	0.582896	-0.048162	0.967131	-0.0560072	0.981579	-0.0768942	0.988107
cg13746813	NA	IGR	0.0154418	0.965711	-0.0504124	0.999262	0.125347	0.993937	0.000938371	0.997232	-0.0550773	0.89462	0.0166248	0.972381	0.0360497	0.868591	0.193857	0.812099	0.0811537	0.981579	0.181772	0.988107
cg13826055	DFNB31	Body	-0.0161461	0.965711	0.0440104	0.999262	0.113744	0.993937	-0.012776	0.978432	0.00695561	0.986995	-0.0149349	0.972381	0.0053057	0.976483	0.0409993	0.967131	-0.0383905	0.981579	0.131697	0.988107
cg13844341	MAD1L1	Body	0.133136	0.635711	0.0118196	0.999262	0.0164428	0.993937	-0.166601	0.42749	-0.088917	0.876525	-0.031708	0.968083	-0.116545	0.529235	-0.0879003	0.967131	-0.0464491	0.981579	-0.0511037	0.988107
cg13941682	PCGF3	5'UTR	0.0795341	0.791593	-0.10506	0.989621	0.00548626	0.993937	0.02235	0.942077	0.0910291	0.876525	0.0856362	0.893688	-0.0277477	0.906088	0.0500647	0.967131	0.0479518	0.981579	0.094665	0.988107
cg13957377	NA	IGR	0.0118435	0.967384	0.177201	0.895534	0.00439379	0.993937	0.0136209	0.978432	0.0552644	0.89462	-0.0986716	0.883477	-0.0448646	0.834284	0.0480846	0.967131	-0.000715891	0.995481	-0.0454735	0.996409
cg14093474	PRDM2	Body	0.115089	0.711974	-0.0998812	0.999262	0.0704921	0.993937	0.0285445	0.936532	0.0247332	0.946099	-0.137971	0.772127	-0.121031	0.519969	-0.0227039	0.967131	0.0320829	0.981579	-0.0363092	0.996409
cg14224203	C9orf86	Body	-0.0670324	0.829458	-0.0496668	0.999262	0.0986171	0.993937	-0.0328623	0.930105	0.0805909	0.89462	-0.152529	0.726367	-0.18439	0.343169	0.064503	0.967131	0.154807	0.799586	0.0871839	0.988107
cg14333394	TRAF2	Body	0.117297	0.711974	-0.119903	0.985684	0.0741283	0.993937	-0.222155	0.19613	-0.161414	0.77505	-0.0274865	0.968083	-0.126753	0.492864	-0.000735298	0.999294	0.035198	0.981579	-0.107828	0.988107
cg14474302	NA	IGR	0.0802691	0.791593	-0.0191595	0.999262	-0.129087	0.993937	-0.0607522	0.882257	-0.124256	0.77505	-0.134504	0.772127	0.0550244	0.799702	0.0598139	0.967131	0.0279456	0.981579	0.000525612	0.997825
cg14519252	NA	IGR	0.0347187	0.896931	-0.0696652	0.999262	-0.125331	0.993937	-0.106894	0.801822	-0.0887686	0.876525	-0.0872584	0.893688	-0.138367	0.441776	-0.0141577	0.967131	0.0661135	0.981579	0.0917177	0.988107
cg14609407	SLPI	1stExon	0.196954	0.355679	-0.00889528	0.999262	0.011738	0.993937	-0.080013	0.811275	0.0125472	0.975456	-0.153667	0.726367	0.0076731	0.976116	-0.0796443	0.967131	-0.056062	0.981579	-0.0411687	0.996409
cg14623316	SRGAP3	Body	0.0213313	0.939688	-0.0363792	0.999262	-0.0791441	0.993937	-0.0345907	0.930105	-0.0476283	0.89462	-0.0264513	0.968083	0.0535085	0.802707	-0.0382194	0.967131	0.0177683	0.981579	-0.0724958	0.988107
cg14628343	NA	IGR	-0.0210606	0.939688	-0.0189615	0.999262	-0.180712	0.993937	0.0719675	0.814769	0.0188256	0.960883	0.0131741	0.972381	0.14497	0.427082	-0.112152	0.943166	-0.194158	0.736302	-0.118779	0.988107
cg14717666	SYNPO2	Body	0.142713	0.575004	0.0885625	0.999262	0.0477257	0.993937	-0.0975583	0.801822	-0.118416	0.77505	-0.0188371	0.972381	-0.0553889	0.799702	0.10428	0.958756	0.0415185	0.981579	-0.0223724	0.997825
cg14779825	CEACAM8	TSS1500	-0.0545276	0.863465	-0.0555795	0.999262	0.0281091	0.993937	-0.0712549	0.814769	0.0664153	0.89462	-0.0870327	0.893688	-0.115464	0.531042	0.0078464	0.980182	0.116065	0.8848	-0.0727763	0.988107
cg14830791	NA	IGR	-0.0455289	0.874288	-0.138759	0.944144	0.0777566	0.993937	-0.0054303	0.986483	-0.026194	0.946099	-0.00868488	0.972484	-0.0156042	0.955394	-0.0996296	0.958756	-0.131982	0.853214	-0.119327	0.988107
cg14832378	NA	IGR	0.0854727	0.791593	-0.222662	0.895534	-0.0319048	0.993937	-0.131314	0.726967	-0.01632	0.969215	-0.135059	0.772127	-0.116745	0.529235	-0.0423473	0.967131	0.00473391	0.98789	-0.0624769	0.988107
cg14859417	PTPRE	TSS1500	-0.195927	0.355679	-0.0706205	0.999262	-0.313179	0.436711	0.109019	0.801822	0.0752702	0.89462	-0.122198	0.830334	-0.0402717	0.845889	0.0786059	0.967131	0.138331	0.853214	0.122484	0.988107
cg14866567	NA	IGR	0.0607154	0.843381	-0.0637175	0.999262	0.0684188	0.993937	-0.129666	0.726967	-0.0750219	0.89462	-0.0106586	0.972381	0.0297829	0.89732	-0.0185953	0.967131	-0.0325827	0.981579	-0.074595	0.988107
cg14965639	STON1-GTF2A1L	TSS200	0.0606601	0.843381	0.00584281	0.999262	-0.138448	0.993937	-0.0551994	0.88961	0.0468705	0.89462	-0.157308	0.726367	-0.107523	0.566325	0.136227	0.943166	0.164755	0.746051	0.0871065	0.988107
cg14973995	MFSD10	5'UTR	0.034814	0.896931	0.0586902	0.999262	0.126264	0.993937	-0.118448	0.770753	-0.00452743	0.988031	-0.0848171	0.893688	-0.10842	0.563475	0.0489231	0.967131	0.0336533	0.981579	-0.0188769	0.997825
cg15090834	SOX12	1stExon	0.0613736	0.843381	0.0349637	0.999262	-0.0198638	0.993937	-0.0848951	0.807237	0.104486	0.78644	0.123975	0.827232	-0.000528957	0.995367	0.12175	0.943166	0.113591	0.8848	0.0880223	0.988107
cg15157241	PKNOX1	5'UTR	-0.00706737	0.967384	0.157692	0.895534	0.106799	0.993937	-0.181783	0.371157	-0.0944086	0.876525	-0.0736264	0.893688	-0.103618	0.569899	0.0452918	0.967131	0.0368458	0.981579	0.0240556	0.997825
cg15228694	CYB5R2	Body	0.00866353	0.967384	-0.0663971	0.999262	0.100882	0.993937	-0.0428297	0.910908	-0.0191094	0.960883	0.0366907	0.968083	0.0463257	0.83303	-0.194493	0.812099	-0.160766	0.759665	-0.118169	0.988107
cg15592062	RPS6KA2	Body	-0.0325013	0.896931	-0.111398	0.985684	-0.0353896	0.993937	-0.0808643	0.811275	-0.0634099	0.89462	0.107527	0.883477	-0.037614	0.861012	-0.169773	0.812099	-0.186054	0.736302	-0.130855	0.988107
cg15616382	MKX	Body	0.0692159	0.808697	-0.103289	0.999262	-0.0824853	0.993937	0.0100802	0.979759	0.0342589	0.941436	-0.0555117	0.949355	-0.231977	0.343169	0.0308986	0.967131	0.076265	0.981579	-0.0339907	0.997825
cg15709265	NA	IGR	-0.00231273	0.990782	-0.0478726	0.999262	-0.056912	0.993937	0.0487888	0.90858	0.0413918	0.927535	-0.0368648	0.968083	-0.0121886	0.96405	0.0148479	0.967131	0.152636	0.799586	0.0970287	0.988107
cg15930703	DOCK10	Body	0.143368	0.575004	0.0871237	0.999262	0.114215	0.993937	0.0973874	0.801822	-0.0240012	0.946099	0.0626969	0.907009	0.0368625	0.864494	0.0340494	0.967131	0.000635273	0.995481	-0.0205924	0.997825
cg16103421	NA	IGR	0.0274022	0.914592	-0.192096	0.895534	-0.0512343	0.993937	0.0523585	0.900337	0.010506	0.975456	-0.195753	0.721248	-0.0211873	0.922051	-0.151158	0.943166	-0.0956811	0.908719	-0.00875483	0.997825
cg16403326	AQP5	3'UTR	-0.122206	0.711974	-0.00167187	0.999262	0.0613696	0.993937	-0.0910735	0.801822	-0.00278934	0.988031	0.0367165	0.968083	-0.148731	0.427082	0.00402801	0.999186	0.0431276	0.981579	-0.0152653	0.997825
cg16415939	NA	IGR	-0.0053482	0.979055	-0.0139925	0.999262	-0.0369126	0.993937	-0.236453	0.19613	-0.0715618	0.89462	0.0224104	0.969012	0.0120047	0.96405	-0.0619069	0.967131	-0.0770744	0.981579	-0.0270868	0.997825
cg16498504	NA	IGR	0.057028	0.851	0.0607466	0.999262	0.066489	0.993937	-0.100538	0.801822	-0.149134	0.77505	-0.0288926	0.968083	-0.176723	0.36606	-0.113491	0.943166	-0.114278	0.8848	-0.164829	0.988107
cg16688112	GALNS	Body	-0.0142362	0.965954	0.0623893	0.999262	-0.0134366	0.993937	-0.0404015	0.927288	0.0626811	0.89462	-0.119889	0.843393	-0.170318	0.379687	0.149485	0.943166	0.12907	0.853214	0.102398	0.988107
cg16761550	PKMYT1	5'UTR	-0.0879023	0.768232	0.0147323	0.999262	-0.124956	0.993937	-0.0535645	0.900337	-0.0420819	0.927535	-0.090922	0.893688	-0.129336	0.484068	0.230719	0.812099	0.132095	0.853214	0.0984282	0.988107
cg16771652	NOD2	TSS1500	-0.0617334	0.843381	-0.0781643	0.999262	-0.0328777	0.993937	-0.0559475	0.88961	0.0369579	0.941436	0.0643771	0.907009	0.208545	0.343169	-0.169106	0.812099	-0.146861	0.853214	-0.0834111	0.988107
cg16955336	NA	IGR	0.245445	0.302718	0.151633	0.895534	-0.0109725	0.993937	-0.0333331	0.930105	0.0312116	0.941436	-0.0487069	0.951543	-0.183097	0.343169	0.0739135	0.967131	0.137116	0.853214	-0.00437258	0.997825
cg16986748	NA	IGR	-0.106878	0.711974	-0.209147	0.895534	-0.0354613	0.993937	-0.0985321	0.801822	-0.0504596	0.89462	-0.161346	0.721248	-0.182055	0.343169	-0.0140964	0.967131	0.00592061	0.98789	0.0247328	0.997825
cg17053201	GABBR1	Body	0.148482	0.575004	-0.0485542	0.999262	-0.0475662	0.993937	-0.112559	0.801822	0.0228177	0.951693	-0.044321	0.951543	-0.133233	0.462647	0.0245357	0.967131	0.0283132	0.981579	-0.00764556	0.997825
cg17199483	ABCC1	TSS1500	-0.213746	0.323022	0.0453444	0.999262	-0.0338266	0.993937	-0.0550898	0.88961	0.00667184	0.986995	0.0882388	0.893688	-0.103153	0.569899	-0.071914	0.967131	-0.0419796	0.981579	-0.0647309	0.988107
cg17237951	NA	IGR	-0.0938502	0.733407	-0.0268897	0.999262	0.00461707	0.993937	-0.0109025	0.979759	-0.0293284	0.941436	-0.0678408	0.894717	-0.0647811	0.777365	0.100229	0.958756	-0.00910665	0.98789	0.124151	0.988107
cg17342247	CTNS	5'UTR	-0.11929	0.711974	0.00792245	0.999262	0.0279257	0.993937	-0.0337878	0.930105	-0.053623	0.89462	-0.171108	0.721248	-0.160435	0.415035	0.0398189	0.967131	0.0588579	0.981579	-0.0234139	0.997825
cg17472111	NA	IGR	-0.0364963	0.896931	-0.0557018	0.999262	-0.0836734	0.993937	0.0794584	0.811275	0.0882398	0.876525	-0.130657	0.794327	-0.110749	0.558798	0.0245293	0.967131	-0.00559169	0.98789	0.0697742	0.988107
cg17547928	PCGF3	Body	0.20941	0.323022	-0.00600009	0.999262	0.133177	0.993937	-0.0916637	0.801822	0.00207346	0.98865	-0.0272318	0.968083	-0.201178	0.343169	0.0181599	0.967131	0.0452753	0.981579	-0.000989957	0.997825
cg17734624	NA	IGR	0.0949759	0.733407	-0.191106	0.895534	-0.0873256	0.993937	0.00548512	0.986483	0.0316469	0.941436	-0.23982	0.721248	-0.060285	0.791353	0.0307116	0.967131	0.0794833	0.981579	0.0557633	0.988107
cg17781669	NA	IGR	-0.170115	0.471997	0.136255	0.950372	0.0481563	0.993937	0.102305	0.801822	0.10861	0.78644	-0.0503485	0.951543	-0.15302	0.427082	0.000615973	0.999294	0.11045	0.8848	0.049285	0.988107
cg17904988	NDUFS2	TSS1500	0.157761	0.528002	-0.07764	0.999262	0.228876	0.993937	-0.0996221	0.801822	-0.0883752	0.876525	-0.0938954	0.893688	-0.140835	0.432565	0.0104232	0.97367	0.0987027	0.888578	-0.0920982	0.988107
cg18040878	HOXC4	TSS1500	0.164466	0.484525	-0.0230275	0.999262	-0.00169851	0.993937	-0.070984	0.814769	0.075641	0.89462	-0.0405123	0.968083	-0.0477029	0.83303	-0.0084398	0.980047	-0.000515958	0.995481	-0.0377087	0.996409
cg18151262	MIDN	Body	-0.0979775	0.71359	-0.11981	0.985684	0.165473	0.993937	-0.127851	0.726967	-0.0193061	0.960883	-0.0464656	0.951543	-0.0314891	0.893931	-0.0175149	0.967131	-0.0122475	0.98789	0.0272287	0.997825
cg18159802	NA	IGR	0.105328	0.711974	-0.0672884	0.999262	-0.062167	0.993937	0.085769	0.807237	0.0642096	0.89462	-0.0328819	0.968083	-0.192363	0.343169	0.180229	0.812099	0.176061	0.736302	0.0838432	0.988107
cg18191196	CUL5	Body	-0.0367393	0.896931	-0.0106487	0.999262	-0.00130777	0.993937	0.100331	0.801822	-0.0138951	0.975456	0.0539572	0.951543	-0.105869	0.569899	0.103351	0.958756	0.0466942	0.981579	0.129233	0.988107
cg18568145	FAM189B	TSS1500	0.110319	0.711974	0.0298898	0.999262	0.0349031	0.993937	-0.113978	0.792009	-0.137745	0.77505	-0.0805182	0.893688	-0.0997536	0.569899	-0.0431117	0.967131	-0.00749106	0.98789	-0.00219596	0.997825
cg18693985	CPEB4	Body	-0.072399	0.797495	0.0314102	0.999262	0.083179	0.993937	-0.133378	0.726967	-0.239257	0.77505	0.0307696	0.968083	-0.047261	0.83303	-0.0147027	0.967131	-0.0493933	0.981579	-0.0929463	0.988107
cg18886109	ADAMTS14	Body	0.0723652	0.797495	-0.11046	0.985684	0.163806	0.993937	-0.192875	0.322343	-0.130767	0.77505	0.0242745	0.969012	-0.0667841	0.777365	0.0148608	0.967131	0.0116864	0.98789	-0.00225723	0.997825
cg18993778	HIPK2	Body	-0.0828586	0.791593	0.0165381	0.999262	0.232345	0.993937	-0.222745	0.19613	-0.195189	0.77505	-0.0893643	0.893688	-0.135584	0.461141	-0.0742747	0.967131	-0.0710054	0.981579	-0.111775	0.988107
cg19002941	ERICH1	Body	-0.00193753	0.990782	-0.112237	0.985684	0.0506522	0.993937	0.122917	0.742528	0.154068	0.77505	0.0996682	0.883477	0.054947	0.799702	0.0111165	0.97367	-0.0309865	0.981579	-0.0867712	0.988107
cg19312314	CBS	3'UTR	-0.204185	0.343432	0.0336005	0.999262	0.110451	0.993937	0.00918378	0.979759	0.00269582	0.988031	0.0826402	0.893688	0.0812691	0.675972	-0.138597	0.943166	-0.103701	0.8848	-0.173178	0.988107
cg19339902	HTRA3	Body	-0.0551335	0.863465	-0.00644864	0.999262	0.140506	0.993937	-0.0348874	0.930105	0.135984	0.77505	0.0528672	0.951543	-0.0456645	0.83303	-0.0254258	0.967131	-0.0272329	0.981579	-0.0751819	0.988107
cg19383974	NA	IGR	0.0428686	0.891061	-0.113169	0.985684	-0.0435711	0.993937	-0.172354	0.402289	-0.0642999	0.89462	-0.0315952	0.968083	-0.0999245	0.569899	-0.125123	0.943166	-0.0563039	0.981579	-0.130923	0.988107
cg19392396	GRB10	TSS1500	0.173738	0.458142	-0.0334083	0.999262	-0.0973971	0.993937	0.0180354	0.955415	0.0784465	0.89462	0.0731427	0.893688	-0.0636136	0.778959	0.0990943	0.958756	0.0912342	0.957723	0.1037	0.988107
cg19473989	AFAP1	5'UTR	0.0698956	0.806165	0.120014	0.985684	-0.0366973	0.993937	0.0924279	0.801822	0.13187	0.77505	0.0339817	0.968083	-0.0423875	0.841451	-0.0894515	0.967131	-0.101731	0.8848	-0.0538736	0.988107
cg19690214	IPCEF1	TSS1500	-0.127929	0.686087	-0.0156876	0.999262	-0.00787852	0.993937	-0.225551	0.19613	-0.122308	0.77505	-0.0289604	0.968083	0.0989376	0.569899	-0.033972	0.967131	-0.073611	0.981579	-0.000248295	0.997825
cg19832721	KIAA1267	TSS1500	0.263255	0.262294	-0.0452337	0.999262	0.0540652	0.993937	-0.0943433	0.801822	-0.047638	0.89462	-0.126352	0.821871	-0.0231967	0.906665	-0.0161669	0.967131	-0.0410734	0.981579	0.00173162	0.997825
cg19893585	PLEC1	Body	-0.0828432	0.791593	-0.0726885	0.999262	-0.0078227	0.993937	0.0721804	0.814769	0.0673149	0.89462	-0.0225136	0.969012	0.0636265	0.778959	-0.121556	0.943166	-0.0816664	0.981579	-0.0948617	0.988107
cg20022454	TMCO3	Body	0.0204548	0.939688	0.0225906	0.999262	-0.0423032	0.993937	0.0867848	0.806368	0.0244527	0.946099	0.07203	0.893688	-0.0564049	0.799702	0.0448403	0.967131	-0.0153239	0.981579	-0.0659724	0.988107
cg20034202	B3GNT7	TSS200	0.0258091	0.919557	-0.0243848	0.999262	-0.135578	0.993937	-0.0373381	0.930105	0.00790044	0.983652	-0.000432148	0.998023	-0.0737863	0.731009	-0.00100942	0.999294	-0.0148241	0.981579	-0.0815473	0.988107
cg20183802	PIP4K2C	Body	-0.0484813	0.874288	0.018111	0.999262	-0.141359	0.993937	0.0277384	0.936532	0.125072	0.77505	-0.138539	0.772127	-0.0655584	0.777365	0.0537316	0.967131	0.0451205	0.981579	0.0975511	0.988107
cg20335425	S100A8	5'UTR	0.11631	0.711974	0.0542572	0.999262	0.0181812	0.993937	-0.241	0.189174	-0.105914	0.78644	-0.164429	0.721248	-0.171718	0.3755	-0.100007	0.958756	-0.0508476	0.981579	-0.0421489	0.996409
cg20371765	ICA1	TSS200	0.0717132	0.797495	-0.0645855	0.999262	0.119573	0.993937	-0.0460189	0.90858	-0.0542196	0.89462	0.0174375	0.972381	0.106911	0.567577	0.0944245	0.967131	0.0576486	0.981579	0.0656145	0.988107
cg20529923	NA	IGR	0.250006	0.302718	0.00862732	0.999262	0.087198	0.993937	-0.110863	0.801822	-0.162459	0.77505	-0.0793862	0.893688	-0.0944221	0.582161	0.0817632	0.967131	0.113562	0.8848	0.0149687	0.997825
cg20551756	NA	IGR	-0.104125	0.711974	-0.0728749	0.999262	-0.102596	0.993937	-0.0925279	0.801822	0.0990037	0.827837	-0.0558793	0.949355	-0.00525087	0.976483	-0.0172279	0.967131	0.00622051	0.98789	0.0658305	0.988107
cg20603106	ARHGAP24	TSS200	0.0334208	0.896931	-0.171183	0.895534	-0.0164269	0.993937	-0.153454	0.560267	-0.0134985	0.975456	-0.0943727	0.893688	-0.114732	0.533278	0.0852752	0.967131	0.107322	0.8848	0.0485369	0.988107
cg20654462	NA	IGR	0.032775	0.896931	-0.0735507	0.999262	0.146239	0.993937	0.0305051	0.930105	-0.00903874	0.981106	0.0363682	0.968083	0.0623331	0.780465	0.0178084	0.967131	0.0519795	0.981579	0.0748659	0.988107
cg20810975	ITGA2B	TSS1500	0.036361	0.896931	0.0477386	0.999262	-0.0247759	0.993937	0.0457996	0.90858	0.0284706	0.941436	-0.0118196	0.972381	-0.140761	0.432565	0.0762452	0.967131	0.129612	0.853214	0.0491947	0.988107
cg20875821	SERPINB2	5'UTR	-0.105651	0.711974	-0.0221654	0.999262	-0.133959	0.993937	0.122694	0.742528	0.090639	0.876525	-0.0488166	0.951543	0.0606237	0.791353	-0.0920251	0.967131	-0.0557234	0.981579	-0.0252584	0.997825
cg20979815	NA	IGR	-0.0703477	0.806165	-0.139057	0.944144	-0.0230375	0.993937	-0.0936726	0.801822	0.0194318	0.960883	-0.0694694	0.893688	-0.0650327	0.777365	0.0264449	0.967131	0.0427729	0.981579	0.0262645	0.997825
cg21150839	NA	IGR	-0.167842	0.484525	-0.0544028	0.999262	-0.0383321	0.993937	-0.161864	0.468985	-0.0636066	0.89462	-0.0446628	0.951543	-0.155575	0.422267	-0.167877	0.812099	-0.107077	0.8848	-0.195844	0.988107
cg21242009	NA	IGR	0.0317632	0.896931	-0.108951	0.986968	0.110658	0.993937	-0.215828	0.215396	-0.0276934	0.941436	0.0689534	0.893688	0.152059	0.427082	-0.113223	0.943166	-0.153465	0.799586	-0.0125244	0.997825
cg21312929	EYA1	3'UTR	0.0749916	0.797495	0.0634961	0.999262	0.136686	0.993937	-0.0724319	0.814769	-0.0686048	0.89462	0.0708271	0.893688	0.099802	0.569899	-0.0266029	0.967131	0.0212155	0.981579	0.0104961	0.997825
cg21422164	RASA3	Body	0.0752438	0.797495	-0.194962	0.895534	0.0341695	0.993937	-0.0469991	0.90858	0.130235	0.77505	-0.115132	0.862045	0.0973959	0.569899	0.109224	0.958756	0.00418248	0.98789	0.199388	0.988107
cg21526750	NA	IGR	-0.0976023	0.71359	0.0169168	0.999262	-0.106807	0.993937	-0.0833505	0.80859	-0.0610526	0.89462	-0.113977	0.867451	-0.219769	0.343169	0.0793928	0.967131	0.048371	0.981579	0.00570757	0.997825
cg21919809	ETV2	1stExon	0.0504926	0.874288	0.00279033	0.999262	-0.0774456	0.993937	-0.000377283	0.997232	0.0640516	0.89462	-0.0766289	0.893688	-0.0794952	0.680392	-0.179042	0.812099	-0.107909	0.8848	-0.161005	0.988107
cg21956614	NA	IGR	-0.179274	0.458142	-0.110361	0.985684	-0.0171286	0.993937	0.25267	0.189174	0.151875	0.77505	-0.0445854	0.951543	0.0854814	0.651895	0.0608523	0.967131	-0.00757168	0.98789	-0.0137852	0.997825
cg22017309	RAB3IL1	TSS1500	0.160058	0.512242	-0.151179	0.895534	-0.0945184	0.993937	-0.168162	0.42749	-0.0188288	0.960883	-0.16569	0.721248	-0.175714	0.36606	0.0799249	0.967131	0.133236	0.853214	0.0733955	0.988107
cg22129323	VAMP1	3'UTR	-0.0597036	0.843381	-0.0958559	0.999262	0.217273	0.993937	-0.147847	0.609154	-0.0238013	0.946099	0.0778511	0.893688	0.121238	0.519969	-0.16371	0.812099	-0.209817	0.736302	-0.172153	0.988107
cg22221074	EFCAB4B	TSS1500	0.0137226	0.965954	-0.0637874	0.999262	0.0827086	0.993937	0.00823251	0.98166	-0.0517688	0.89462	0.0708239	0.893688	-0.0283186	0.90495	-0.138033	0.943166	-0.00313767	0.98789	-0.105716	0.988107
cg22312904	GSDMD	TSS1500	0.134206	0.632264	-0.0679059	0.999262	0.060628	0.993937	-0.0375767	0.930105	-0.0375964	0.941436	-0.197156	0.721248	-0.10901	0.563475	0.167148	0.812099	0.188818	0.736302	0.0238718	0.997825
cg22383121	CHCHD2	Body	-0.0266764	0.915	0.000221363	0.999262	0.177546	0.993937	-0.120108	0.757508	-0.115749	0.77505	-0.00933311	0.972381	-0.202994	0.343169	0.0768386	0.967131	0.085965	0.981579	-0.0092482	0.997825
cg22579028	MIAT	Body	0.0513384	0.874288	0.0528999	0.999262	0.001547	0.993937	-0.123265	0.742528	-0.205356	0.77505	0.102335	0.883477	0.100047	0.569899	-0.169048	0.812099	-0.188805	0.736302	-0.0509554	0.988107
cg22883919	NA	IGR	0.0241976	0.927383	-0.00480007	0.999262	-0.119964	0.993937	-0.0852724	0.807237	-0.187531	0.77505	0.0313469	0.968083	0.0960928	0.571601	0.000844947	0.999294	0.0399448	0.981579	-0.0720863	0.988107
cg23220533	OVOL1	TSS1500	-0.0534389	0.870933	0.157674	0.895534	0.109933	0.993937	-0.0193736	0.953031	-0.0184612	0.960883	0.0147704	0.972381	-0.00617332	0.976116	-0.0247808	0.967131	-0.0415797	0.981579	-0.0141496	0.997825
cg23326224	GLT1D1	TSS1500	0.129064	0.681445	0.0523231	0.999262	0.139812	0.993937	-0.0711969	0.814769	0.0644643	0.89462	-0.044321	0.951543	-0.143341	0.430172	-0.024755	0.967131	0.0223119	0.981579	-0.0481177	0.988107
cg23369111	C18orf26	TSS200	0.0448154	0.874288	-0.139657	0.944144	0.0572549	0.993937	0.0869525	0.806368	0.131747	0.77505	-0.0613908	0.912527	-0.0810304	0.675972	-0.0496745	0.967131	-0.0631048	0.981579	-0.0610549	0.988107
cg23476065	WDR86	Body	0.0516275	0.874288	0.0431948	0.999262	0.302813	0.436711	-0.116619	0.786754	-0.0854763	0.89462	0.0823564	0.893688	0.0633329	0.778959	-0.0516192	0.967131	-0.0292161	0.981579	-0.0985733	0.988107
cg24328095	CSNK1D	Body	-0.0608569	0.843381	-0.0149886	0.999262	0.128353	0.993937	-0.0278738	0.936532	-0.00329883	0.988031	-0.00912348	0.972381	-0.202897	0.343169	0.0483297	0.967131	0.114552	0.8848	0.00638151	0.997825
cg24330347	NA	IGR	0.00284786	0.990782	-0.17264	0.895534	-0.0722304	0.993937	0.0447355	0.908688	-0.0164523	0.969215	-0.157421	0.726367	-0.0460838	0.83303	0.0381839	0.967131	0.0675098	0.981579	0.0846236	0.988107
cg24347562	PRTN3	TSS1500	0.00705814	0.967384	-0.124563	0.985684	0.0640728	0.993937	-0.19206	0.322343	-0.156429	0.77505	-0.12501	0.827232	-0.22023	0.343169	-0.0485845	0.967131	-0.00719116	0.98789	-0.13456	0.988107
cg24427660	PNPLA2	TSS200	0.0273376	0.914592	0.049894	0.999262	-0.14655	0.993937	0.0297247	0.933759	0.0591178	0.89462	-0.0562824	0.949355	-0.249219	0.343169	0.121537	0.943166	0.145171	0.853214	0.0178063	0.997825
cg24500630	NA	IGR	0.0816807	0.791593	-0.133977	0.967386	0.130697	0.993937	-0.0282575	0.936532	0.127806	0.77505	-0.117938	0.843393	-0.100241	0.569899	-0.0308567	0.967131	0.0280842	0.981579	-0.0261678	0.997825
cg24502330	CDA	TSS1500	0.108837	0.711974	0.105887	0.989621	-0.0592165	0.993937	0.0322754	0.930105	0.00559157	0.988031	0.13493	0.772127	-0.146447	0.427082	-0.0168764	0.967131	-0.118722	0.8848	-0.139455	0.988107
cg24616539	NA	IGR	0.0569418	0.851	-0.0697584	0.999262	0.0161877	0.993937	-0.0129792	0.978432	0.109023	0.78644	-0.209302	0.721248	-0.166612	0.388962	0.137723	0.943166	0.0647237	0.981579	0.0469955	0.988107
cg24842334	PTPRN2	Body	-0.0519473	0.874288	-0.00911082	0.999262	0.0647985	0.993937	-0.0703488	0.814769	-0.0299636	0.941436	-0.0950822	0.893688	0.101966	0.569899	-0.0065306	0.988288	-0.0670777	0.981579	-0.0477017	0.988107
cg25196348	PDSS1	TSS1500	0.0997336	0.71359	-0.214244	0.895534	-0.106448	0.993937	-0.000316015	0.997232	0.000325691	0.997147	-0.165832	0.721248	-0.0457225	0.83303	0.0925959	0.967131	0.102721	0.8848	0.133557	0.988107
cg25219643	CCDC81	Body	0.0474387	0.874288	-0.169232	0.895534	-0.0155417	0.993937	-0.0888098	0.806368	-0.064661	0.89462	-0.0714366	0.893688	-0.0398105	0.845889	-0.0787123	0.967131	-0.104198	0.8848	-0.0818988	0.988107
cg25414746	C10orf79	Body	-0.0760004	0.797495	0.163337	0.895534	0.0246722	0.993937	-0.0975841	0.801822	0.106865	0.78644	-0.0141996	0.972381	-0.023316	0.906665	-0.0337721	0.967131	-0.00935173	0.98789	0.0362028	0.996409
cg25540871	NA	IGR	0.0992661	0.71359	-0.070906	0.999262	-0.00270326	0.993937	-0.0746021	0.814769	-0.0715489	0.89462	-0.0105102	0.972381	-0.0235096	0.906665	-0.102561	0.958756	-0.100715	0.8848	-0.16176	0.988107
cg25616968	BAHCC1	Body	0.0595621	0.843381	-0.111165	0.985684	0.0158846	0.993937	0.0724932	0.814769	0.0336978	0.941436	0.0491971	0.951543	-0.0147689	0.955394	-0.0169957	0.967131	0.0595738	0.981579	-0.0892993	0.988107
cg25740457	CCKBR	3'UTR	0.117325	0.711974	-0.0443133	0.999262	0.0964162	0.993937	-0.146215	0.618199	-0.144175	0.77505	-0.023952	0.969012	-0.138751	0.441776	0.116	0.943166	0.0667262	0.981579	0.000551409	0.997825
cg25741609	MAPKAPK2	Body	0.0114929	0.967384	-0.0168061	0.999262	0.0240821	0.993937	0.0341038	0.930105	-0.057857	0.89462	-0.0098491	0.972381	-0.0270316	0.906088	-0.137704	0.943166	-0.106036	0.8848	-0.10093	0.988107
cg25755851	NA	IGR	0.0884375	0.768223	0.156474	0.895534	0.0447991	0.993937	-0.0531485	0.900337	-0.047222	0.89462	0.0623228	0.907009	0.0989118	0.569899	0.0243454	0.967131	0.0230988	0.981579	0.0103833	0.997825
cg25843426	MICALL2	Body	0.0630989	0.843381	-0.0737196	0.999262	-0.00705718	0.993937	-0.182521	0.371157	-0.0690466	0.89462	-0.233753	0.721248	-0.189134	0.343169	-0.093328	0.967131	-0.0144758	0.981579	-0.0504298	0.988107
cg26024880	IL28RA	TSS1500	0.195623	0.355679	-0.108194	0.986968	-0.141311	0.993937	0.17207	0.402289	0.114018	0.780101	-0.0578691	0.949355	0.0691999	0.77512	-0.068889	0.967131	-0.0710699	0.981579	-0.00132532	0.997825
cg26269286	NA	IGR	0.0116067	0.967384	0.033752	0.999262	0.0210998	0.993937	0.0920409	0.801822	0.125798	0.77505	0.0707368	0.893688	0.00862136	0.976116	-0.0627486	0.967131	0.0205545	0.981579	-0.0402142	0.996409
cg26306976	ITGB1BP1	TSS1500	0.0981743	0.71359	-0.0192003	0.999262	0.069272	0.993937	0.0460543	0.90858	0.0724293	0.89462	0.069708	0.893688	0.0772342	0.698052	-0.164023	0.812099	-0.189166	0.736302	-0.0758236	0.988107
cg26542792	LOC283404	TSS1500	0.144426	0.575004	-0.0162236	0.999262	0.141415	0.993937	0.0601654	0.882257	0.115169	0.77505	-0.0048923	0.987437	0.00189328	0.993666	-0.013445	0.967131	-0.00959359	0.98789	-0.00934494	0.997825
cg26678143	SEC62	Body	0.00732571	0.967384	0.0498183	0.999262	0.194435	0.993937	-0.0550479	0.88961	-0.123211	0.77505	0.10954	0.883477	-0.0112629	0.964416	-0.0664316	0.967131	-0.0364911	0.981579	-0.10896	0.988107
cg26704043	FARS2	5'UTR	-0.059396	0.843381	-0.155059	0.895534	-0.126463	0.993937	-0.00811642	0.98166	0.035797	0.941436	-0.0235521	0.969012	-0.0966798	0.571601	-0.0354168	0.967131	0.0203223	0.981579	-0.0534738	0.988107
cg26704293	NA	IGR	0.0342912	0.896931	0.0529057	0.999262	-0.130418	0.993937	-0.0561862	0.88961	-0.0373836	0.941436	-0.0987361	0.883477	0.00684096	0.976116	-0.0658994	0.967131	-0.0410767	0.981579	0.049227	0.988107
cg26819611	KIFC3	5'UTR	0.0580828	0.848187	0.00770109	0.999262	-0.0859222	0.993937	0.0565989	0.88961	0.231347	0.77505	-0.173891	0.721248	-0.320061	0.0665467	0.29708	0.221197	0.374079	0.00528379	0.231086	0.988107
cg26821681	NA	IGR	0.0715564	0.797495	-0.0252761	0.999262	-0.0860737	0.993937	-0.0231046	0.942077	0.0371804	0.941436	-0.00665959	0.979241	-0.15094	0.427082	0.0402672	0.967131	0.0357139	0.981579	0.0111314	0.997825
cg26924822	RBPJ	Body	-0.0416784	0.896931	-0.136091	0.950372	0.0890241	0.993937	-0.0427458	0.910908	0.0648126	0.89462	-0.00616295	0.97985	-0.0499671	0.828062	-0.00329594	0.999294	-0.00623341	0.98789	0.035732	0.996409
cg27203560	NA	IGR	0.0995952	0.71359	0.0549038	0.999262	-0.0328777	0.993937	-0.0875684	0.806368	-0.0514431	0.89462	-0.0141577	0.972381	-0.30883	0.0665467	0.112913	0.943166	0.176696	0.736302	-0.073144	0.988107
cg27278668	NA	IGR	0.105709	0.711974	-0.156865	0.895534	0.0546632	0.993937	-0.0237366	0.942077	0.036313	0.941436	-0.0273833	0.968083	-0.0461612	0.83303	0.0663606	0.967131	0.0160753	0.981579	0.0960677	0.988107
cg27489373	CLCN7	Body	0.22773	0.308672	-0.0258004	0.999262	-0.188734	0.993937	0.228911	0.19613	0.139273	0.77505	0.063658	0.907009	-0.00132884	0.993666	0.0780544	0.967131	0.169982	0.746051	0.118053	0.988107
cg27665985	NA	IGR	-0.0787406	0.792819	-0.122582	0.985684	0.0567126	0.993937	0.0902964	0.804564	0.0496018	0.89462	-0.0269996	0.968083	-0.0196553	0.932802	0.0102684	0.97367	0.0404446	0.981579	0.0301824	0.997825

## Sheet: T cells
			Age at visit		BMI		Alcohol units per week		Lymphocyte count		Lymphocyte percent		Maximum temperature		Minimum temperature		Daylight
Probe ID	HGNC symbol	Feature	rho	p.BH	rho	p.BH	rho	p.BH	rho	p.BH	rho	p.BH	rho	p.BH	rho	p.BH	rho	p.BH
cg01475207	NA	IGR	-0.0548044	0.675266	-0.076341	0.851992	0.0825491	0.932138	0.0382292	0.963153	0.0874163	0.992883	0.0405252	0.903948	0.0534597	0.957615	-3.54708e-05	0.999689
cg01746044	ASCC2	TSS1500	-0.0414724	0.765191	-0.0617194	0.851992	-0.101368	0.932138	-0.141276	0.699586	-0.0665038	0.992883	-0.0776287	0.868403	0.0740496	0.957615	0.0473793	0.999689
cg02082571	CLEC4A	Body	0.420582	8.16534e-06	-0.000378647	0.999815	0.179468	0.719672	-0.000251529	0.997797	0.0363751	0.992883	0.0596817	0.868403	0.0480872	0.957615	0.0455219	0.999689
cg03249590	SNORD59A	TSS1500	-0.0641661	0.659564	0.0779313	0.851992	0.0643758	0.932138	-0.147664	0.692398	-0.0544626	0.992883	-0.0936021	0.868403	-0.0163397	0.957615	-0.000348258	0.999689
cg03736781	NA	IGR	-0.0905411	0.529244	-0.0304024	0.943462	-0.00680201	0.969314	-0.0512765	0.963153	0.0111383	0.992883	0.0576499	0.868403	0.0735111	0.957615	0.0586461	0.999689
cg05504759	DUSP7	Body	-0.24193	0.0257094	-0.000733992	0.999815	0.0682035	0.932138	-0.0931723	0.919292	-0.0837046	0.992883	-0.0573081	0.868403	0.0305769	0.957615	-0.0479146	0.999689
cg06561886	SLC44A2	5'UTR	0.292696	0.00395197	-0.0183673	0.980514	0.0869269	0.932138	-0.151646	0.692398	-0.140125	0.822187	0.0523351	0.868403	0.0853136	0.957615	0.0941169	0.999689
cg06679265	SNORD59A	TSS1500	-0.119561	0.376315	0.16174	0.831247	0.020414	0.939478	-0.000496609	0.997797	0.181853	0.691014	-0.0335302	0.930526	-0.0163365	0.957615	0.024362	0.999689
cg06763375	CBFA2T3	Body	-0.030859	0.765191	0.0738011	0.851992	-0.0205496	0.939478	0.0057239	0.992117	0.136313	0.822187	0.0735394	0.868403	-0.049935	0.957615	-0.00133822	0.999689
cg07080372	SLC25A22	TSS1500	-0.502325	5.61821e-08	0.0852363	0.851992	-0.172203	0.719672	-0.0173233	0.963153	-0.0287292	0.992883	-0.0603073	0.868403	0.0239598	0.957615	-0.00676202	0.999689
cg08130175	UBXN10	TSS1500	-0.229056	0.0368261	0.0701195	0.851992	-0.0324949	0.939478	-0.0339694	0.963153	-0.0550495	0.992883	-0.0513418	0.868403	0.0442111	0.957615	-0.0328363	0.999689
cg08422803	ITGB2	TSS200	-0.213113	0.0533377	0.0555271	0.851992	0.0591926	0.932138	-0.0255883	0.963153	0.0031409	0.992883	-0.0854977	0.868403	-0.039948	0.957615	-0.179624	0.733408
cg09798090	HTR2A	TSS1500	-0.0836982	0.553669	-0.077407	0.851992	0.0283643	0.939478	-0.0377262	0.963153	0.0459977	0.992883	-0.246547	0.280961	-0.230601	0.483453	-0.21405	0.409823
cg11284582	NA	IGR	-0.444005	2.39545e-06	-0.116547	0.851992	-0.125068	0.849191	0.0157657	0.963153	0.00410187	0.992883	-0.127739	0.868403	-0.0715698	0.957615	-0.0796738	0.999689
cg11523799	C6orf154	TSS1500	0.0587348	0.672725	0.00592436	0.999815	0.0645911	0.932138	0.20142	0.598856	0.206525	0.514978	-0.00923315	0.983788	0.0219121	0.957615	0.024291	0.999689
cg11792075	NA	IGR	-0.152441	0.210721	-0.0598553	0.851992	0.017942	0.939478	-0.0173136	0.963153	0.0652042	0.992883	-0.203361	0.377119	-0.127564	0.957615	-0.126411	0.999689
cg13007871	HLA-E	Body	-0.37446	8.83432e-05	-0.0499289	0.851992	-0.189978	0.719672	0.0465329	0.963153	-0.0153272	0.992883	-0.0768805	0.868403	-0.0306156	0.957615	-0.0764363	0.999689
cg13440692	NA	IGR	-0.165324	0.161782	0.0389132	0.888219	-0.035565	0.939478	-0.123991	0.807574	0.0110093	0.992883	-0.055128	0.868403	-0.0421376	0.957615	-0.0606034	0.999689
cg13520651	NA	IGR	0.0938841	0.518191	-0.0107477	0.999815	0.111663	0.932138	0.0116639	0.963153	-0.00189937	0.992883	0.0100007	0.983788	0.053321	0.957615	0.0532126	0.999689
cg13843266	SHB	TSS1500	-0.136424	0.276138	-0.139429	0.851992	0.0473349	0.939478	-0.0161849	0.963153	-0.00974194	0.992883	-0.0204948	0.96126	-0.0118509	0.957615	-0.00996406	0.999689
cg14017402	NA	IGR	-0.0612259	0.668192	-0.0622903	0.851992	0.0192418	0.939478	0.127558	0.807574	0.122595	0.830675	-0.203439	0.377119	-0.128922	0.957615	-0.214524	0.409823
cg14449910	SLC22A18AS	Body	-0.0263535	0.787242	-0.198388	0.610547	-0.0978277	0.932138	0.0112543	0.963153	-0.0334567	0.992883	0.0384129	0.903948	0.0556041	0.957615	0.0338552	0.999689
cg15003208	WDR51A	TSS1500	-0.405482	1.59728e-05	0.163727	0.831247	-0.148576	0.719672	0.0358558	0.963153	0.0999476	0.992883	-0.129106	0.868403	-0.019142	0.957615	-0.0670075	0.999689
cg15448372	NA	IGR	-0.172071	0.143629	-0.132818	0.851992	-0.10506	0.932138	-0.034911	0.963153	0.000812635	0.992883	-0.117989	0.868403	-0.0737239	0.957615	-0.167654	0.749722
cg16123269	TRIM15	Body	-0.182955	0.113711	-0.0571582	0.851992	-0.13982	0.719672	0.0917276	0.919292	0.126042	0.830675	-0.00499873	0.983788	-0.0446465	0.957615	0.0528611	0.999689
cg16145216	HIVEP3	TSS1500	0.0764248	0.601802	0.0478784	0.851992	0.0134126	0.939478	0.0924661	0.919292	-0.0113221	0.992883	-0.065893	0.868403	-0.0657394	0.957615	0.0114474	0.999689
cg16585234	MAN1C1	1stExon	-0.44152	2.39545e-06	-0.0515659	0.851992	-0.0755477	0.932138	0.0300416	0.963153	-0.00686547	0.992883	-0.0858041	0.868403	0.000287001	0.997486	-0.0441289	0.999689
cg17970341	LRP5	Body	-0.037299	0.765191	-0.119297	0.851992	0.051952	0.939478	0.0626211	0.963153	0.0077942	0.992883	-0.139555	0.868403	-0.0709087	0.957615	-0.102581	0.999689
cg18304704	MAST3	Body	-0.538009	4.59406e-09	0.0421405	0.882085	-0.149764	0.719672	0.172246	0.692398	0.0649688	0.992883	-0.0873295	0.868403	-0.0228376	0.957615	-0.0695195	0.999689
cg18614702	NA	IGR	0.0950773	0.518191	-0.0661467	0.851992	0.0133488	0.939478	0.057813	0.963153	-0.0991059	0.992883	-0.0386644	0.903948	0.0335824	0.957615	-0.0623737	0.999689
cg18650626	MAD1L1	Body	0.0671861	0.650307	-0.232151	0.582757	0.094622	0.932138	0.0214155	0.963153	0.032973	0.992883	-0.0703757	0.868403	-0.0369555	0.957615	0.0277446	0.999689
cg18734877	PTK2B	Body	-0.308255	0.00220867	-0.100056	0.851992	0.0760421	0.932138	0.0456074	0.963153	0.0551689	0.992883	0.00353781	0.983788	0.0045759	0.997486	-0.0367219	0.999689
cg19051117	NA	IGR	0.141434	0.25883	-0.0210586	0.980454	-0.170856	0.719672	-0.0556686	0.963153	-0.0358075	0.992883	0.0422957	0.903948	0.0692963	0.957615	0.038776	0.999689
cg19577671	NA	IGR	0.0545153	0.675266	-0.0942364	0.851992	-0.0245367	0.939478	0.104801	0.899005	0.219847	0.514978	0.0803216	0.868403	0.0898572	0.957615	0.00593329	0.999689
cg19628934	NA	IGR	-0.0703846	0.639492	-0.0907354	0.851992	0.0154301	0.939478	-0.0212671	0.963153	0.0180811	0.992883	0.00185114	0.983788	0.0401544	0.957615	0.0393274	0.999689
cg20826277	MESTIT1	Body	-0.033224	0.765191	-0.104617	0.851992	-0.0210121	0.939478	0.027191	0.963153	0.0735144	0.992883	0.00421829	0.983788	-0.0382163	0.957615	-0.0307499	0.999689
cg20979296	DDX60L	TSS200	-0.00302009	0.973335	0.00942539	0.999815	-0.144644	0.719672	-0.118786	0.814693	-0.133853	0.822187	-0.0912446	0.868403	0.0132472	0.957615	-0.00303436	0.999689
cg21101720	ANKRD13B	Body	0.106118	0.467763	-0.0747507	0.851992	-0.269409	0.442058	0.0502833	0.963153	-0.0159786	0.992883	-0.0191016	0.96126	-0.0339307	0.957615	0.00364059	0.999689
cg21743649	PGAP2	Body	0.0842149	0.553669	-0.223291	0.582757	0.0526537	0.939478	-0.075204	0.963153	-0.0529857	0.992883	-0.1025	0.868403	0.00214445	0.997486	-0.0549055	0.999689
cg23195373	NA	IGR	-0.200796	0.0726941	-0.193954	0.610547	-0.154883	0.719672	-0.16105	0.692398	-0.14025	0.822187	0.0228394	0.96126	0.18618	0.92179	0.123977	0.999689
cg23666844	CRYGN	TSS1500	-0.0318524	0.765191	-0.099188	0.851992	-0.0709466	0.932138	0.0511669	0.963153	0.0660491	0.992883	-0.0817954	0.868403	-0.0206286	0.957615	-0.0112894	0.999689
cg23682634	DERA	Body	-0.0962983	0.518191	-0.128332	0.851992	0.0014832	0.988805	-0.105168	0.899005	0.054453	0.992883	-0.0618489	0.868403	-0.0312961	0.957615	0.0380182	0.999689
cg24038192	HIPK2	Body	0.0326274	0.765191	-0.0770284	0.851992	-0.0148719	0.939478	-0.254077	0.214864	-0.151202	0.822187	0.0642386	0.868403	0.163991	0.957615	0.124396	0.999689
cg24761195	LRP11	Body	-0.224526	0.0397029	-0.0580611	0.851992	-0.0875968	0.932138	-0.154919	0.692398	0.040219	0.992883	-0.0185598	0.96126	0.0265654	0.957615	0.0365381	0.999689
cg25017777	H6PD	5'UTR	0.405731	1.59728e-05	-0.023511	0.980454	0.193997	0.719672	0.0841849	0.925813	0.111195	0.94338	0.105805	0.868403	0.0361783	0.957615	0.0786742	0.999689
cg25247558	NA	IGR	0.0391873	0.765191	-2.33013e-05	0.999815	0.0605243	0.932138	-0.0859747	0.925813	-0.0914698	0.992883	-0.0204658	0.96126	0.0707862	0.957615	0.00122213	0.999689
cg27064708	RAD51L1	Body	0.482765	1.85924e-07	-0.0805993	0.851992	0.158081	0.719672	-0.048084	0.963153	-0.0202933	0.992883	0.11162	0.868403	0.0426181	0.957615	0.0826953	0.999689
