# Supplementary material for: Genome-wide analysis of differential transcriptional and epigenetic variability across human immune cell types
Source: Genome Biol. 2017 Jan 26;18:18. doi: 10.1186/s13059-017-1156-8 (PMC5270224; doi:10.1186/s13059-017-1156-8)
Supplement: Additional file 10: — Relationship between DNA methylation and gene expression. Relationship between DNA methylation and gene expression among genes showing cell type-specific DNA methylation hypervariability. (XLSX 29 kb) [file 13059_2017_1156_MOESM10_ESM.xlsx]

## Sheet: Hypervar prom methyl monocytes
Probe ID	HGNC symbol	Feature	rho	p.BH
cg01285164	GXYLT2	TSS1500	-0.1303	0.316091
cg02956542	PGLYRP4	TSS1500	0.0641	0.682104
cg05576959	DGKZ	TSS200	-0.1091	0.383259
cg05620821	ALDH3B1	TSS200	0.0083	0.959007
cg05844788	GHRL	TSS1500	-0.1169	0.363257
cg06512774	TTC3	1stExon	-0.3036	0.00228375
cg07507418	TRERF1	5'UTR	-0.1014	0.390437
cg08394278	DOK3	TSS200	-0.1052	0.383259
cg11241750	GRAMD3	TSS1500	-0.2896	0.00367
cg12940993	RNASE1	TSS200	-0.3347	0.00074
cg13247398	DGKZ	TSS200	-0.1488	0.225515
cg13500029	GLIPR1	TSS1500	-0.3227	0.00111429
cg15164194	WDFY4	TSS1500	-0.0574	0.683857
cg16303562	MSR1	TSS200	-0.6987	0
cg16611352	P2RX1	1stExon	-0.03	0.853446
cg17079034	KLHL30	TSS200	-0.6607	0
cg17419815	C12orf71	1stExon	-0.1953	0.0726725
cg19463078	TNIP3	5'UTR	-0.0005	0.995469
cg20316614	TMEM63A	5'UTR	0.0145	0.934349
cg21494776	ICAM4	1stExon	-0.1052	0.383259
cg21766592	SLC1A5	1stExon	-0.3754	0.000135
cg22225307	FCHO1	5'UTR	-0.3391	0.00072
cg22968401	PIPOX	5'UTR	-0.058	0.683857
cg23348723	C7orf16	TSS1500	0.5126	0
cg24465943	FCER1G	TSS200	-0.2284	0.0288164
cg24693053	MFSD7	1stExon	-0.0515	0.688956
cg24710655	SPATC1	1stExon	0.0507	0.688956
cg25124402	GPBAR1	5'UTR	-0.0195	0.92138
cg25353896	PARVG	TSS200	-0.1186	0.363257
cg26121730	MEF2D	5'UTR	-0.2416	0.020292

## Sheet: Hypervar prom methyl neutrophil
Probe ID	HGNC symbol	Feature	rho	p.BH
cg00319655	ANXA3	5'UTR	-0.192	0.091052
cg00337466	ADAM8	TSS200	-0.1753	0.137613
cg00724111	PACSIN3	TSS1500	-0.0964	0.461247
cg00910127	AARS2	TSS1500	0.0262	0.859804
cg01195214	UBE2I	5'UTR	0.2502	0.020008
cg01796438	ATG7	TSS1500	-0.0006	0.994321
cg02097014	CHI3L1	TSS1500	-0.3258	0.00128067
cg02845204	KRTAP5-9	TSS200	-0.1113	0.378842
cg03593358	MFN2	TSS1500	0.1959	0.0848758
cg03622371	P2RY6	5'UTR	-0.2009	0.0761816
cg03699958	GTF2IRD1	5'UTR	-0.1497	0.232094
cg03962678	TTC36	TSS200	-0.078	0.598504
cg04099543	P2RY6	5'UTR	-0.1234	0.33088
cg04384209	KDM4B	5'UTR	0.0413	0.790476
cg04444949	AGTRAP	TSS1500	-0.0604	0.72762
cg04459545	USHBP1	TSS200	-0.0172	0.931282
cg04514683	ABP1	TSS1500	-0.5483	0
cg04540406	SHCBP1	TSS1500	0.0409	0.790476
cg04764056	CLC	TSS200	-0.3266	0.00128067
cg05171937	STK38L	TSS1500	-0.2753	0.0088536
cg05504085	RASAL3	TSS1500	-0.0642	0.704128
cg05670991	SIGLEC9	TSS200	-0.425	1.13333e-05
cg06097213	LOC285830	TSS1500	-0.4586	0
cg06246882	C16orf38	TSS1500	0.0272	0.859804
cg08320524	KCNJ15	5'UTR	0.334	0.0010404
cg08423562	FHL3	5'UTR	-0.3363	0.0010404
cg09152813	NCK2	5'UTR	-0.0808	0.58495
cg09288273	NIPAL4	TSS1500	0.0276	0.859804
cg10621012	ARAP3	TSS1500	-0.0074	0.963387
cg10884953	GNG7	5'UTR	-0.0132	0.95385
cg11155735	CSGALNACT1	TSS1500	-0.3155	0.00189354
cg12209693	GTF2IRD1	5'UTR	-0.1245	0.33088
cg12244647	PLXNB2	5'UTR	0.0442	0.790476
cg12744634	CCDC21	TSS1500	0.2051	0.070937
cg12746557	KCNJ15	5'UTR	0.3603	0.000398286
cg13443575	SLFN13	TSS200	-0.0979	0.459773
cg13473383	ZDHHC5	TSS1500	0.0408	0.790476
cg13534536	AFAP1	5'UTR	-0.845	0
cg13692972	OTUB1	TSS1500	0.0733	0.628456
cg13941682	PCGF3	5'UTR	-0.7378	0
cg14609407	SLPI	1stExon	-0.2463	0.0216731
cg14779825	CEACAM8	TSS1500	-0.1114	0.378842
cg14859417	PTPRE	TSS1500	0.0537	0.767578
cg14973995	MFSD10	5'UTR	-0.0085	0.963387
cg15090834	SOX12	1stExon	-0.0383	0.800772
cg15157241	PKNOX1	5'UTR	-0.0476	0.790476
cg16761550	PKMYT1	5'UTR	0.1056	0.410314
cg16771652	NOD2	TSS1500	-0.2954	0.00420629
cg19392396	GRB10	TSS1500	-0.2372	0.0281377
cg19473989	AFAP1	5'UTR	-0.8092	0
cg19690214	IPCEF1	TSS1500	0.1111	0.378842
cg20034202	B3GNT7	TSS200	-0.044	0.790476
cg20335425	S100A8	5'UTR	-0.1291	0.311578
cg20371765	ICA1	TSS200	0.3515	0.0005525
cg20603106	ARHGAP24	TSS200	-0.1422	0.266623
cg20810975	ITGA2B	TSS1500	-0.1337	0.310851
cg20875821	SERPINB2	5'UTR	-0.0099	0.963387
cg21919809	ETV2	1stExon	-0.0013	0.994321
cg22017309	RAB3IL1	TSS1500	-0.1304	0.311578
cg22221074	EFCAB4B	TSS1500	-0.1189	0.351921
cg23220533	OVOL1	TSS1500	-0.0535	0.767578
cg23326224	GLT1D1	TSS1500	-0.2728	0.0091545
cg24427660	PNPLA2	TSS200	-0.0344	0.824353
cg24502330	CDA	TSS1500	-0.1294	0.311578
cg25196348	PDSS1	TSS1500	-0.1596	0.197569
cg26024880	IL28RA	TSS1500	0.1503	0.232094
cg26704043	FARS2	5'UTR	-0.2253	0.0396576
cg26819611	KIFC3	5'UTR	-0.0431	0.790476

## Sheet: Hypervar prom methyl T cells
Probe ID	HGNC symbol	Feature	rho	p.BH
cg01746044	ASCC2	TSS1500	-0.0151	0.968536
cg06561886	SLC44A2	5'UTR	0.0772	0.671475
cg07080372	SLC25A22	TSS1500	-0.0463	0.911627
cg08130175	UBXN10	TSS1500	-0.146	0.208282
cg08422803	ITGB2	TSS200	-0.2431	0.019266
cg13843266	SHB	TSS1500	0.0036	0.968536
cg15003208	WDR51A	TSS1500	0.1829	0.0991632
cg16145216	HIVEP3	TSS1500	-0.3728	0.000126
cg16585234	MAN1C1	1stExon	-0.3144	0.001516
cg20979296	DDX60L	TSS200	-0.0243	0.968536
cg23666844	CRYGN	TSS1500	-0.7818	0
cg25017777	H6PD	5'UTR	-0.0093	0.968536

## Sheet: Hypervar body methyl monocytes
Probe ID	HGNC symbol	Feature	rho	p.BH
cg00704970	RPTOR	Body	-0.0675	0.599498
cg01268901	WNT5B	Body	-0.1389	0.226048
cg01561304	COL23A1	Body	-0.2536	0.0182081
cg01718736	LSM5	Body	0.3299	0.0013764
cg01858712	SNX29	Body	-0.0381	0.82939
cg03181524	RYR1	Body	-0.4114	2.46667e-05
cg03270167	RAMP1	Body	-0.0992	0.455991
cg03502889	ABTB2	Body	-0.2241	0.0405674
cg04751149	MEIS1	Body	0.0468	0.770667
cg05388840	HIVEP3	Body	0.2216	0.0405674
cg05573434	SORCS2	Body	-0.1897	0.084397
cg06153925	RPTOR	Body	-0.0189	0.881852
cg07093324	ACTR3	Body	-0.093	0.485195
cg11051139	KRT80	Body	-0.4892	0
cg11636960	LOC401127	Body	0.0825	0.532612
cg13303520	BSDC1	Body	-0.1539	0.168665
cg13368983	CFLAR	Body	-0.0867	0.517992
cg14101659	EXOC2	Body	0.0789	0.542426
cg14598846	PLEC1	Body	0.0233	0.866639
cg15367247	DGKG	Body	0.1541	0.168665
cg15368872	KLRK1	3'UTR	0.2621	0.0145688
cg15691325	CYBRD1	Body	0.2122	0.0502716
cg16328023	KIAA0895	Body	0.231	0.0358641
cg16386080	CDK20	Body	-0.0346	0.835254
cg17387577	NCOR2	Body	-0.032	0.835254
cg18547299	PODNL1	Body	-0.0706	0.593649
cg19147804	MAD1L1	Body	-0.5405	0
cg19709355	RARA	Body	0.0253	0.866639
cg20954219	ALK	Body	0.1116	0.379058
cg22716190	PPT1	Body	-0.0072	0.93619
cg23042148	DNMT3A	Body	0.163	0.150951
cg24461952	GALNT9	Body	-0.0098	0.93619
cg25153741	COL23A1	Body	-0.2929	0.00592617
cg25422678	BRE	Body	-0.2019	0.0636532
cg26247309	PDGFRB	Body	-0.3691	0.0002405
cg26528311	FHL3	3'UTR	-0.1811	0.100443
cg27432242	GGCX	Body	-0.2631	0.0145688

## Sheet: Hypervar body methyl neutrophil
Probe ID	HGNC symbol	Feature	rho	p.BH
cg00289503	COL9A3	Body	-0.0408	0.747251
cg01055824	CCDC88C	Body	-0.1233	0.291239
cg01269314	PINX1	Body	-0.107	0.356865
cg02288859	KREMEN1	Body	-0.4222	1e-05
cg02736016	WNK1	Body	-0.0513	0.699149
cg02797539	RAB37	Body	-0.3237	0.0014525
cg03209720	C6orf35	Body	0.0918	0.431465
cg03310874	RADIL	Body	0.098	0.39559
cg03566001	PVT1	Body	-0.1929	0.0991709
cg04153152	MYO3B	Body	0.0361	0.777972
cg04246138	MYLK3	Body	-0.1516	0.213568
cg04569651	COL23A1	Body	0.0616	0.619919
cg04952627	PRKAR1B	Body	0.0163	0.932443
cg05060607	C3AR1	Body	-0.6985	0
cg05785753	NADSYN1	Body	-0.1941	0.0991709
cg06515418	COL23A1	Body	-0.2703	0.0127669
cg07033722	PPT1	3'UTR	0.0997	0.39559
cg07932199	ATXN2	Body	0.108	0.356865
cg08257257	MTL5	Body	0.2014	0.0951533
cg08400424	ARHGAP26	Body	-0.1561	0.210229
cg08515285	DGCR6L	Body	-0.2158	0.069055
cg09022584	TMEM51	Body	-0.0715	0.555169
cg09046445	JPH3	Body	-0.0488	0.710519
cg09374353	EHD1	3'UTR	-0.1409	0.24791
cg09806625	EXOC2	Body	-0.346	0.000595
cg10131232	SIRPG	3'UTR	0.0033	0.984702
cg10688516	NFIC	Body	-0.129	0.281596
cg10875794	COMMD10	Body	0.1466	0.231991
cg10876767	SORCS2	Body	-0.198	0.09912
cg11381282	GJB2	Body	-0.0015	0.986343
cg11808531	POLE	Body	0.0614	0.619919
cg11951169	ASH1L	Body	-0.109	0.356865
cg12062782	RIN1	Body	-0.0337	0.787383
cg12081643	COL4A1	3'UTR	-0.3873	7e-05
cg12213414	LYG2	Body	-0.1263	0.281596
cg12547959	TRIO	Body	-0.1656	0.1751
cg12587921	RAB35	Body	0.006	0.974548
cg12682382	UBE2W	Body	-0.1302	0.281596
cg12894711	BLVRA	Body	-0.208	0.0827235
cg13320211	PPAP2B	Body	0.0785	0.526642
cg13826055	DFNB31	Body	-0.7761	0
cg13844341	MAD1L1	Body	0.0723	0.555169
cg14093474	PRDM2	Body	-0.1538	0.210229
cg14224203	C9orf86	Body	-0.1183	0.314503
cg14333394	TRAF2	Body	0.099	0.39559
cg14623316	SRGAP3	Body	0.0112	0.95572
cg14717666	SYNPO2	Body	-0.0427	0.74203
cg15228694	CYB5R2	Body	-0.3722	0.000147778
cg15592062	RPS6KA2	Body	-0.1956	0.0991709
cg15930703	DOCK10	Body	-0.4821	0
cg17547928	PCGF3	Body	-0.5254	0
cg18151262	MIDN	Body	0.0152	0.932443
cg18191196	CUL5	Body	-0.1414	0.24791
cg18693985	CPEB4	Body	-0.1661	0.1751
cg18993778	HIPK2	Body	0.0089	0.962557
cg19339902	HTRA3	Body	-0.3411	0.000693636
cg19893585	PLEC1	Body	0.0462	0.722023
cg20022454	TMCO3	Body	-0.1354	0.264382
cg20183802	PIP4K2C	Body	-0.0715	0.555169
cg22129323	VAMP1	3'UTR	0.6466	0
cg22383121	CHCHD2	Body	0.5595	0
cg22579028	MIAT	Body	0.2491	0.025935
cg23476065	WDR86	Body	0.1679	0.1751
cg24328095	CSNK1D	Body	-0.1851	0.118285
cg25219643	CCDC81	Body	0.1393	0.249774
cg25741609	MAPKAPK2	Body	0.1537	0.210229
cg25843426	MICALL2	Body	-0.1275	0.281596
cg26678143	SEC62	Body	0.1261	0.281596
cg26924822	RBPJ	Body	-0.2163	0.069055
cg27489373	CLCN7	Body	0.1074	0.356865

## Sheet: Hypervar body methyl T cell
Probe ID	HGNC symbol	Feature	rho	p.BH
cg02082571	CLEC4A	Body	-0.0121	0.893347
cg05504759	DUSP7	Body	-0.0655	0.718749
cg06763375	CBFA2T3	Body	0.0805	0.718749
cg17970341	LRP5	Body	0.0162	0.893347
cg18304704	MAST3	Body	-0.105	0.71437
cg18650626	MAD1L1	Body	-0.1338	0.546672
cg18734877	PTK2B	Body	0.1464	0.546672
cg21101720	ANKRD13B	Body	0.0554	0.718749
cg23682634	DERA	Body	0.0568	0.718749
cg24038192	HIPK2	Body	0.0165	0.893347
cg24761195	LRP11	Body	-0.2626	0.038172
cg27064708	RAD51L1	Body	-0.0938	0.71437
